# Supplementary material for: Microbial Consortia and Mixed Plastic Waste: Pangenomic Analysis Reveals Potential for Degradation of Multiple Plastic Types via Previously Identified PET Degrading Bacteria
Source: Preprints.org preprint supplement (doi:10.20944/preprints202204.0311.v1), 2022-04-30
Supplement: Supplementary file 1 [file supplementary]

## Sheet: pangenome_all_50%
MICFAM_Id	NbOrganismsFAM	Organism	GO_id	Label	Type	Evidence	Gene	Product	ECnumber	Mutation	ProductType	Localization	Roles	BioProcess	PubmedID	AmigeneStatus	Class	CreationDate	Frame	Begin	End	Length
100	5	Bacillus albus PFYN01	93131232	SEIR01_2180002	CDS	automatic/finished	gltT	proton/sodium-glutamate (aspartate) symport permease		no	t : transporter			16.1 : Circulate ;	8634258, 10588697, 11148213, 15849754, 16850406, 17673229, 25344233	no	2a : Function from experimental evidences in other organisms	2022-01-17	-1	3314120	3315391	1272
100	5	Bacillus albus PFYN01	93133244	SEIR01_4310001	CDS	automatic/finished		L-cystine uptake protein TcyP		no						no		2022-01-17	2	5169833	5171068	1236
100	5	Bacillus albus PFYN01	93133798	SEIR01_4450065	CDS	automatic/finished	gltT	proton/sodium-glutamate (aspartate) symport permease		no	t : transporter			16.1 : Circulate ;	8634258, 10588697, 11148213, 15849754, 16850406, 17673229, 25344233	no	2a : Function from experimental evidences in other organisms	2022-01-17	-2	5668645	5669919	1275
100	5	Bacillus thuringiensis C15	93116291	SEIU01_10120	CDS	automatic/finished	gltT	proton/sodium-glutamate (aspartate) symport permease		no	t : transporter			16.1 : Circulate ;	8634258, 10588697, 11148213, 15849754, 16850406, 17673229, 25344233	no	2a : Function from experimental evidences in other organisms	2022-01-17	1	102514	103785	1272
100	5	Bacillus thuringiensis C15	93117214	SEIU01_460118	CDS	automatic/finished		L-cystine uptake protein TcyP		no						no		2022-01-17	-2	1022310	1023545	1236
100	5	Bacillus thuringiensis C15	93118129	SEIU01_550011	CDS	automatic/finished	dctP	C4-dicarboxylate transport protein		no	t : transporter			16.1 : Circulate ;	10627041, 10708364, 12949159, 15849754, 16850406, 20363944, 22389480	no	2a : Function from experimental evidences in other organisms	2022-01-17	-2	1875120	1876382	1263
100	5	Bacillus thuringiensis C15	93121155	SEIU01_1180041	CDS	automatic/finished	gltT	proton/sodium-glutamate (aspartate) symport permease		no	t : transporter			16.1 : Circulate ;	8634258, 10588697, 11148213, 15849754, 16850406, 17673229, 25344233	no	2a : Function from experimental evidences in other organisms	2022-01-17	3	4765263	4766537	1275
100	5	Pseudomonas sp. B10	93122063	SEIT01_20046	CDS	automatic/finished	dctA	C4-dicarboxylate transport protein 1		no						no		2022-01-17	-3	398221	399534	1314
100	5	Pseudomonas sp. B10	93123723	SEIT01_350076	CDS	automatic/finished	gltP	glutamate/aspartate : H(+) symporter GltP		no						no		2022-01-17	1	2194057	2195388	1332
100	5	Pseudomonas sp. B10	93125496	SEIT01_590014	CDS	automatic/finished	gltP	Proton/glutamate-aspartate symporter		no						no		2022-01-17	1	4090828	4092087	1260
100	5	Pseudomonas sp. B10	93125954	SEIT01_660006	CDS	automatic/finished	dctA	C4 dicarboxylate/orotate:H(+) symporter		no						no		2022-01-17	2	4558118	4559452	1335
100	5	Pseudomonas sp. B10	93126069	SEIT01_690004	CDS	automatic/finished	dctA	C4-dicarboxylate transport protein 2		no						no		2022-01-17	1	4680937	4682238	1302
100	5	Pseudomonas sp. SWI36 SWI36_1	77223515	SEIS01_50011	CDS	automatic/finished	dctA	C4 dicarboxylate/orotate:H(+) symporter		no						no		2020-07-15	-3	378527	379849	1323
100	5	Pseudomonas sp. SWI36 SWI36_1	77223620	SEIS01_120003	CDS	automatic/finished	dctA	C4 dicarboxylate/orotate:H(+) symporter		no						no		2020-07-15	-1	487108	488418	1311
100	5	Pseudomonas sp. SWI36 SWI36_1	77226814	SEIS01_1550019	CDS	automatic/finished	gltP	glutamate/aspartate : H(+) symporter GltP		no						no		2020-07-15	-3	3759788	3761104	1317
100	5	Pseudomonas sp. SWI36 SWI36_1	77226853	SEIS01_1560016	CDS	automatic/finished	gltP	glutamate/aspartate : H(+) symporter GltP		no						no		2020-07-15	3	3799527	3800882	1356
100	5	Pseudomonas sp. SWI36 SWI36_1	77227140	SEIS01_1630001	CDS	automatic/finished	dctA	C4 dicarboxylate/orotate:H(+) symporter		no						no		2020-07-15	-3	4136096	4137415	1320
100	5	Pseudomonas sp. SWI36 SWI36_2	77218016	SEIQ01_80011	CDS	automatic/finished	dctA	C4 dicarboxylate/orotate:H(+) symporter		no						no		2020-07-15	-1	453424	454746	1323
100	5	Pseudomonas sp. SWI36 SWI36_2	77218178	SEIQ01_150003	CDS	automatic/finished	dctA	C4 dicarboxylate/orotate:H(+) symporter		no						no		2020-07-15	-3	638195	639505	1311
100	5	Pseudomonas sp. SWI36 SWI36_2	77220106	SEIQ01_1310035	CDS	automatic/finished	gltP	glutamate/aspartate : H(+) symporter GltP		no						no		2020-07-15	3	2691867	2693183	1317
100	5	Pseudomonas sp. SWI36 SWI36_2	77221067	SEIQ01_1490001	CDS	automatic/finished	dctA	C4 dicarboxylate/orotate:H(+) symporter		no						no		2020-07-15	-3	3687971	3689290	1320
100	5	Pseudomonas sp. SWI36 SWI36_2	77221212	SEIQ01_1520027	CDS	automatic/finished	gltP	glutamate/aspartate : H(+) symporter GltP		no						no		2020-07-15	-2	3841620	3842975	1356
1007	5	Bacillus albus PFYN01	93128873	SEIR01_490003	CDS	automatic/finished	ppk	Polyphosphate kinase	2.7.4.1	no						no		2022-01-17	2	1157513	1159621	2109
1007	5	Bacillus thuringiensis C15	93119347	SEIU01_740026	CDS	automatic/finished	ppk	Polyphosphate kinase	2.7.4.1	no						no		2022-01-17	3	3026970	3029078	2109
1007	5	Pseudomonas sp. B10	93122637	SEIT01_260035	CDS	automatic/finished	ppk	Polyphosphate kinase	2.7.4.1	no						no		2022-01-17	-2	1000130	1002355	2226
1007	5	Pseudomonas sp. SWI36 SWI36_1	77225900	SEIS01_1380101	CDS	automatic/finished	ppk	Polyphosphate kinase	2.7.4.1	no						no		2020-07-15	2	2819024	2821267	2244
1007	5	Pseudomonas sp. SWI36 SWI36_2	77217856	SEIQ01_20036	CDS	automatic/finished	ppk	Polyphosphate kinase	2.7.4.1	no						no		2020-07-15	-3	294800	297043	2244
1008	5	Bacillus albus PFYN01	93130733	SEIR01_1680048	CDS	automatic/finished	purN	phosphoribosylglycinamide formyltransferase	2.1.2.2	no	e : enzyme			16.2 : Construct biomass (Anabolism) ;	9683488, 10569930, 12787499, 19574646	no	2a : Function from experimental evidences in other organisms	2022-01-17	-3	2853894	2854481	588
1008	5	Bacillus thuringiensis C15	93119872	SEIU01_850011	CDS	automatic/finished	purN	phosphoribosylglycinamide formyltransferase	2.1.2.2	no	e : enzyme			16.2 : Construct biomass (Anabolism) ;	9683488, 10569930, 12787499, 19574646	no	2a : Function from experimental evidences in other organisms	2022-01-17	2	3551183	3551770	588
1008	5	Pseudomonas sp. B10	93124590	SEIT01_450024	CDS	automatic/finished	purN	phosphoribosylglycinamide formyltransferase 1	2.1.2.2	no						no		2022-01-17	-3	3111511	3112161	651
1008	5	Pseudomonas sp. SWI36 SWI36_1	77227183	SEIS01_1640011	CDS	automatic/finished	purN	phosphoribosylglycinamide formyltransferase 1	2.1.2.2	no						no		2020-07-15	-2	4185543	4186196	654
1008	5	Pseudomonas sp. SWI36 SWI36_2	77221620	SEIQ01_1610011	CDS	automatic/finished	purN	phosphoribosylglycinamide formyltransferase 1	2.1.2.2	no						no		2020-07-15	-1	4249240	4249893	654
102	5	Bacillus albus PFYN01	93127677	SEIR01_10116	CDS	automatic/finished	hmtB	2-hydroxymuconate tautomerase (promiscuous)	5.3.2.6	no	e : enzyme			16.11 : Scavenge (Catabolism) ;	12051677, 14624569, 14730980, 15301547, 17902707	no	2a : Function from experimental evidences in other organisms	2022-01-17	2	117110	117295	186
102	5	Bacillus thuringiensis C15	93116513	SEIU01_20080	CDS	automatic/finished	hmtB	2-hydroxymuconate tautomerase (promiscuous)	5.3.2.6	no	e : enzyme			16.11 : Scavenge (Catabolism) ;	12051677, 14624569, 14730980, 15301547, 17902707	no	2a : Function from experimental evidences in other organisms	2022-01-17	1	337624	337809	186
102	5	Pseudomonas sp. B10	93124191	SEIT01_410047	CDS	automatic/finished		putative tautomerase K2	5.3.2.-	no						no	3 : Putative function from multiple computational evidences	2022-01-17	-2	2671526	2671744	219
102	5	Pseudomonas sp. SWI36 SWI36_1	77226480	SEIS01_1490030	CDS	automatic/finished		putative tautomerase K2	5.3.2.-	no						no	3 : Putative function from multiple computational evidences	2020-07-15	1	3405907	3406116	210
102	5	Pseudomonas sp. SWI36 SWI36_2	77217720	SEIQ01_10145	CDS	automatic/finished		putative tautomerase K2	5.3.2.-	no						no	3 : Putative function from multiple computational evidences	2020-07-15	3	147387	147596	210
1020	5	Bacillus albus PFYN01	93133022	SEIR01_4230095	CDS	automatic/finished	cinA	competence-damage inducible regulator		no	r : regulator			16.3 : Control ;	10438773, 11703670, 20480359	no	2a : Function from experimental evidences in other organisms	2022-01-17	3	4951332	4952570	1239
1020	5	Bacillus thuringiensis C15	93116870	SEIU01_240047	CDS	automatic/finished	cinA	competence-damage inducible regulator		no	r : regulator			16.3 : Control ;	10438773, 11703670, 20480359	no	2a : Function from experimental evidences in other organisms	2022-01-17	1	693694	694932	1239
1020	5	Pseudomonas sp. B10	93125674	SEIT01_620046	CDS	automatic/finished	pncC	NMN aminohydrolase	3.5.1.42	no						no		2022-01-17	-1	4268031	4268531	501
1020	5	Pseudomonas sp. SWI36 SWI36_1	77223371	SEIS01_10228	CDS	automatic/finished		CinA family protein		no						no		2020-07-15	1	221230	221733	504
1020	5	Pseudomonas sp. SWI36 SWI36_1	77228095	SEIS01_1920004	CDS	automatic/finished	pncC	NMN aminohydrolase	3.5.1.42	no						no		2020-07-15	1	5187808	5188290	483
1020	5	Pseudomonas sp. SWI36 SWI36_2	77220197	SEIQ01_1330023	CDS	automatic/finished		CinA family protein		no						no		2020-07-15	-1	2794663	2795166	504
1020	5	Pseudomonas sp. SWI36 SWI36_2	77222978	SEIQ01_2020022	CDS	automatic/finished	pncC	NMN aminohydrolase	3.5.1.42	no						no		2020-07-15	-1	5672992	5673474	483
1031	5	Bacillus albus PFYN01	93130740	SEIR01_1680055	CDS	automatic/finished	purC	phosphoribosylaminoimidazole succinocarboxamide synthetase	6.3.2.6	no	e : enzyme			16.2 : Construct biomass (Anabolism) ;	2495272, 9683488, 10784038, 12787499, 26118696	no	2a : Function from experimental evidences in other organisms	2022-01-17	-1	2860154	2860873	720
1031	5	Bacillus thuringiensis C15	93119866	SEIU01_850005	CDS	automatic/finished	purC	phosphoribosylaminoimidazole succinocarboxamide synthetase	6.3.2.6	no	e : enzyme			16.2 : Construct biomass (Anabolism) ;	2495272, 9683488, 10784038, 12787499, 26118696	no	2a : Function from experimental evidences in other organisms	2022-01-17	3	3544791	3545510	720
1031	5	Pseudomonas sp. B10	93122270	SEIT01_130075	CDS	automatic/finished	purC	phosphoribosylaminoimidazole-succinocarboxamide synthase	6.3.2.6	no						no		2022-01-17	-1	616626	617339	714
1031	5	Pseudomonas sp. SWI36 SWI36_1	77224939	SEIS01_1010049	CDS	automatic/finished	purC	phosphoribosylaminoimidazole-succinocarboxamide synthase	6.3.2.6	no						no		2020-07-15	-3	1865444	1866154	711
1031	5	Pseudomonas sp. SWI36 SWI36_2	77221574	SEIQ01_1590049	CDS	automatic/finished	purC	phosphoribosylaminoimidazole-succinocarboxamide synthase	6.3.2.6	no						no		2020-07-15	-3	4195106	4195816	711
1036	5	Bacillus albus PFYN01	93134303	SEIR01_4610012	CDS	automatic/finished	rpiA	Ribose-5-phosphate isomerase A	5.3.1.6	no						no		2022-01-17	2	6121589	6122251	663
1036	5	Bacillus thuringiensis C15	93119128	SEIU01_690033	CDS	automatic/finished	rpiA	Ribose-5-phosphate isomerase A	5.3.1.6	no						no		2022-01-17	-1	2830120	2830782	663
1036	5	Pseudomonas sp. B10	93121981	SEIT01_10287	CDS	automatic/finished	rpiA	ribose-5-phosphate isomerase A	5.3.1.6	no						no		2022-01-17	2	314159	314833	675
1036	5	Pseudomonas sp. SWI36 SWI36_1	77226339	SEIS01_1460031	CDS	automatic/finished	rpiA	ribose-5-phosphate isomerase A	5.3.1.6	no						no		2020-07-15	-2	3265956	3266630	675
1036	5	Pseudomonas sp. SWI36 SWI36_2	77220637	SEIQ01_1400031	CDS	automatic/finished	rpiA	ribose-5-phosphate isomerase A	5.3.1.6	no						no		2020-07-15	-2	3237684	3238358	675
1037	5	Bacillus albus PFYN01	93129717	SEIR01_1010040	CDS	automatic/finished	moaA	GTP 3',8-cyclase	4.1.99.22	no	e : enzyme			16.10 : Respire ; 16.11 : Scavenge (Catabolism) ;	2170340, 7860592, 16632608, 19566093, 23286307, 25896388, 25941396, 26575208	no	2b : Function from indirect experimental evidences (e.g. phenotypes)	2022-01-17	-2	1921708	1922724	1017
1037	5	Bacillus albus PFYN01	93133603	SEIR01_4390029	CDS	automatic/finished	moaA	GTP 3',8-cyclase	4.1.99.22	no	e : enzyme			16.10 : Respire ; 16.11 : Scavenge (Catabolism) ;	2170340, 7860592, 16632608, 19566093, 23286307, 25896388, 25941396, 26575208	no	2b : Function from indirect experimental evidences (e.g. phenotypes)	2022-01-17	-1	5483153	5484166	1014
1037	5	Bacillus albus PFYN01	93133611	SEIR01_4400007	CDS	automatic/finished	moaA	GTP 3',8-cyclase	4.1.99.22	no	e : enzyme			16.10 : Respire ; 16.11 : Scavenge (Catabolism) ;	2170340, 7860592, 16632608, 19566093, 23286307, 25896388, 25941396, 26575208	no	2b : Function from indirect experimental evidences (e.g. phenotypes)	2022-01-17	2	5493776	5494789	1014
1037	5	Bacillus thuringiensis C15	93118398	SEIU01_590009	CDS	automatic/finished	moaA	GTP 3',8-cyclase	4.1.99.22	no	e : enzyme			16.10 : Respire ; 16.11 : Scavenge (Catabolism) ;	2170340, 7860592, 16632608, 19566093, 23286307, 25896388, 25941396, 26575208	no	2b : Function from indirect experimental evidences (e.g. phenotypes)	2022-01-17	1	2116420	2117436	1017
1037	5	Bacillus thuringiensis C15	93119275	SEIU01_720037	CDS	automatic/finished	moaA	GTP 3',8-cyclase	4.1.99.22	no	e : enzyme			16.10 : Respire ; 16.11 : Scavenge (Catabolism) ;	2170340, 7860592, 16632608, 19566093, 23286307, 25896388, 25941396, 26575208	no	2b : Function from indirect experimental evidences (e.g. phenotypes)	2022-01-17	-1	2957872	2958885	1014
1037	5	Bacillus thuringiensis C15	93119667	SEIU01_770032	CDS	automatic/finished	moaA	GTP 3',8-cyclase	4.1.99.22	no	e : enzyme			16.10 : Respire ; 16.11 : Scavenge (Catabolism) ;	2170340, 7860592, 16632608, 19566093, 23286307, 25896388, 25941396, 26575208	no	2b : Function from indirect experimental evidences (e.g. phenotypes)	2022-01-17	-1	3325615	3326628	1014
1037	5	Pseudomonas sp. B10	93123087	SEIT01_300020	CDS	automatic/finished	moaA	GTP 3',8-cyclase	4.1.99.22	no						no		2022-01-17	-1	1509588	1510586	999
1037	5	Pseudomonas sp. SWI36 SWI36_1	77227679	SEIS01_1780020	CDS	automatic/finished	moaA	GTP 3',8-cyclase	4.1.99.22	no						no		2020-07-15	2	4734632	4735636	1005
1037	5	Pseudomonas sp. SWI36 SWI36_2	77220510	SEIQ01_1380012	CDS	automatic/finished	moaA	GTP 3',8-cyclase	4.1.99.22	no						no		2020-07-15	-1	3115471	3116475	1005
1053	5	Bacillus albus PFYN01	93133509	SEIR01_4360010	CDS	automatic/finished	proB	glutamate 5-kinase	2.7.2.11	no	e : enzyme			16.2 : Construct biomass (Anabolism) ;	16958849, 8083159, 21233158, 21784929	no	2a : Function from experimental evidences in other organisms	2022-01-17	3	5389980	5391083	1104
1053	5	Bacillus thuringiensis C15	93118480	SEIU01_600040	CDS	automatic/finished	proB	glutamate 5-kinase	2.7.2.11	no	e : enzyme			16.2 : Construct biomass (Anabolism) ;	16958849, 8083159, 21233158, 21784929	no	2a : Function from experimental evidences in other organisms	2022-01-17	-2	2204781	2205884	1104
1053	5	Pseudomonas sp. B10	93122084	SEIT01_20067	CDS	automatic/finished	proB	Glutamate 5-kinase	2.7.2.11	no						no		2022-01-17	2	423428	424549	1122
1053	5	Pseudomonas sp. SWI36 SWI36_1	77223965	SEIS01_260002	CDS	automatic/finished	proB	Glutamate 5-kinase	2.7.2.11	no						no		2020-07-15	-2	833001	834119	1119
1053	5	Pseudomonas sp. SWI36 SWI36_2	77221752	SEIQ01_1650018	CDS	automatic/finished	proB	Glutamate 5-kinase	2.7.2.11	no						no		2020-07-15	3	4390767	4391885	1119
1055	5	Bacillus albus PFYN01	93129844	SEIR01_1120018	CDS	automatic/finished	mutY	A/G-specific adenine glycosylase or DNA-(apurinic or apyrimidinic site) lyase	3.2.2.-	no	e : enzyme			16.6 : Maintain ; 16.8 : Protect ;	10463184, 20971907, 21954439, 27399782	no	2a : Function from experimental evidences in other organisms	2022-01-17	-1	2042426	2043523	1098
1055	5	Bacillus albus PFYN01	93133672	SEIR01_4420020	CDS	automatic/finished		8-oxo-dGTP diphosphatase	3.6.1.55	no						no		2022-01-17	-1	5554703	5555104	402
1055	5	Bacillus thuringiensis C15	93120051	SEIU01_850190	CDS	automatic/finished	mutY	A/G-specific adenine glycosylase or DNA-(apurinic or apyrimidinic site) lyase	3.2.2.-	no	e : enzyme			16.6 : Maintain ; 16.8 : Protect ;	10463184, 20971907, 21954439, 27399782	no	2a : Function from experimental evidences in other organisms	2022-01-17	3	3736995	3738092	1098
1055	5	Pseudomonas sp. B10	93123032	SEIT01_290062	CDS	automatic/finished		8-oxo-dGTP diphosphatase	3.6.1.55	no						no		2022-01-17	-2	1428698	1429642	945
1055	5	Pseudomonas sp. B10	93124172	SEIT01_410028	CDS	automatic/finished	mutY	adenine DNA glycosylase	3.2.2.31	no						no		2022-01-17	2	2656511	2657578	1068
1055	5	Pseudomonas sp. SWI36 SWI36_1	77227219	SEIS01_1650007	CDS	automatic/finished		Mutator mutT protein (7,8-dihydro-8-oxoguanine-triphosphatase) / Thiamin-phosphate pyrophosphorylase-like protein	3.6.1.-	no						no		2020-07-15	-3	4217183	4218127	945
1055	5	Pseudomonas sp. SWI36 SWI36_1	77228128	SEIS01_1930010	CDS	automatic/finished	mutY	adenine DNA glycosylase	3.2.2.31	no						no		2020-07-15	-2	5215425	5216492	1068
1055	5	Pseudomonas sp. SWI36 SWI36_2	77218089	SEIQ01_130010	CDS	automatic/finished	mutY	adenine DNA glycosylase	3.2.2.31	no						no		2020-07-15	-3	534011	535078	1068
1055	5	Pseudomonas sp. SWI36 SWI36_2	77218361	SEIQ01_240057	CDS	automatic/finished		Mutator mutT protein (7,8-dihydro-8-oxoguanine-triphosphatase) / Thiamin-phosphate pyrophosphorylase-like protein	3.6.1.-	no						no		2020-07-15	-1	835021	835965	945
1060	5	Bacillus albus PFYN01	93127604	SEIR01_10043	CDS	automatic/finished	atpG	ATP synthase (subunit gamma, component F1)	7.1.2.2	no	e : enzyme			16.10 : Respire ;	8021203, 15347741, 18174126, 22790590	no	2a : Function from experimental evidences in other organisms	2022-01-17	-1	41024	41884	861
1060	5	Bacillus thuringiensis C15	93116442	SEIU01_20009	CDS	automatic/finished	atpG	ATP synthase (subunit gamma, component F1)	7.1.2.2	no	e : enzyme			16.10 : Respire ;	8021203, 15347741, 18174126, 22790590	no	2a : Function from experimental evidences in other organisms	2022-01-17	-1	260539	261399	861
1060	5	Pseudomonas sp. B10	93125249	SEIT01_540127	CDS	automatic/finished	atpG	ATP synthase F1 complex subunit gamma	7.1.2.2	no						no		2022-01-17	-1	3812259	3813119	861
1060	5	Pseudomonas sp. SWI36 SWI36_1	77225092	SEIS01_1120094	CDS	automatic/finished	atpG	ATP synthase F1 complex subunit gamma	7.1.2.2	no						no		2020-07-15	-3	2006237	2007097	861
1060	5	Pseudomonas sp. SWI36 SWI36_2	77219480	SEIQ01_1120073	CDS	automatic/finished	atpG	ATP synthase F1 complex subunit gamma	7.1.2.2	no						no		2020-07-15	2	2040167	2041027	861
1065	5	Bacillus albus PFYN01	93131797	SEIR01_2680001	CDS	automatic/finished	zwf	glucose-6-phosphate 1-dehydrogenase (NADP-dependent)	1.1.1.49	no	e : enzyme			16.2 : Construct biomass (Anabolism) ;	1704005, 19779711, 26129872	no	2a : Function from experimental evidences in other organisms	2022-01-17	3	3818598	3820082	1485
1065	5	Bacillus thuringiensis C15	93117373	SEIU01_480047	CDS	automatic/finished	zwf	glucose-6-phosphate 1-dehydrogenase (NADP-dependent)	1.1.1.49	no	e : enzyme			16.2 : Construct biomass (Anabolism) ;	1704005, 19779711, 26129872	no	2a : Function from experimental evidences in other organisms	2022-01-17	-2	1171230	1172714	1485
1065	5	Pseudomonas sp. B10	93126599	SEIT01_820027	CDS	automatic/finished	zwf	NADP(+)-dependent glucose-6-phosphate dehydrogenase	1.1.1.49	no						no		2022-01-17	-2	5266193	5267659	1467
1065	5	Pseudomonas sp. B10	93127362	SEIT01_1090085	CDS	automatic/finished	zwf	Glucose-6-phosphate 1-dehydrogenase	1.1.1.49	no						no		2022-01-17	-3	6072166	6073689	1524
1065	5	Pseudomonas sp. SWI36 SWI36_1	77224171	SEIS01_370010	CDS	automatic/finished	zwf	NADP(+)-dependent glucose-6-phosphate dehydrogenase	1.1.1.49	no						no		2020-07-15	1	1055575	1057044	1470
1065	5	Pseudomonas sp. SWI36 SWI36_1	77227058	SEIS01_1600066	CDS	automatic/finished	zwf	Glucose-6-phosphate 1-dehydrogenase	1.1.1.49	no						no		2020-07-15	-3	4020122	4021627	1506
1065	5	Pseudomonas sp. SWI36 SWI36_1	77228079	SEIS01_1910013	CDS	automatic/finished	zwf	NADP(+)-dependent glucose-6-phosphate dehydrogenase	1.1.1.49	no						no		2020-07-15	-1	5168497	5169939	1443
1065	5	Pseudomonas sp. SWI36 SWI36_2	77218486	SEIQ01_340003	CDS	automatic/finished	zwf	NADP(+)-dependent glucose-6-phosphate dehydrogenase	1.1.1.49	no						no		2020-07-15	-3	991391	992860	1470
1065	5	Pseudomonas sp. SWI36 SWI36_2	77221791	SEIQ01_1660021	CDS	automatic/finished	zwf	Glucose-6-phosphate 1-dehydrogenase	1.1.1.49	no						no		2020-07-15	2	4441076	4442581	1506
1065	5	Pseudomonas sp. SWI36 SWI36_2	77222434	SEIQ01_1850013	CDS	automatic/finished	zwf	NADP(+)-dependent glucose-6-phosphate dehydrogenase	1.1.1.49	no						no		2020-07-15	-2	5133768	5135210	1443
10691	5	Bacillus albus PFYN01	93129708	SEIR01_1010031	CDS	automatic/finished		putative membrane component		no						no	3 : Putative function from multiple computational evidences	2022-01-17	-2	1915450	1915698	249
10691	5	Bacillus thuringiensis C15	93118407	SEIU01_590018	CDS	automatic/finished		putative Membrane protein		no						no	3 : Putative function from multiple computational evidences	2022-01-17	1	2123446	2123694	249
10691	5	Pseudomonas sp. B10	93127345	SEIT01_1090068	CDS	automatic/finished		DUF1294 domain-containing protein		no						no		2022-01-17	-2	6056456	6056884	429
10691	5	Pseudomonas sp. SWI36 SWI36_1	77225947	SEIS01_1390013	CDS	automatic/finished		conserved membrane protein of unknown function		no	u : unknown	1 : Unknown				no	4 : Unknown function but conserved in other organisms	2020-07-15	-3	2870474	2870887	414
10691	5	Pseudomonas sp. SWI36 SWI36_2	77222382	SEIQ01_1830014	CDS	automatic/finished		conserved membrane protein of unknown function		no	u : unknown	1 : Unknown				no	4 : Unknown function but conserved in other organisms	2020-07-15	-3	5082365	5082778	414
107	5	Bacillus albus PFYN01	93128586	SEIR01_350053	CDS	automatic/finished	rpmGA	ribosomal protein L33		no	s : structure			16.2 : Construct biomass (Anabolism) ; 16.3 : Control ;	12682299, 12904577, 19648245, 22720735, 23002217, 27561249	no	2a : Function from experimental evidences in other organisms	2022-01-17	-1	900908	901057	150
107	5	Bacillus albus PFYN01	93133040	SEIR01_4240009	CDS	automatic/finished	rpmGA	ribosomal protein L33		no	s : structure			16.2 : Construct biomass (Anabolism) ; 16.3 : Control ;	12682299, 12904577, 19648245, 22720735, 23002217, 27561249	no	2a : Function from experimental evidences in other organisms	2022-01-17	-3	4967076	4967225	150
107	5	Bacillus thuringiensis C15	93116774	SEIU01_130130	CDS	automatic/finished	rpmGA	ribosomal protein L33		no	s : structure			16.2 : Construct biomass (Anabolism) ; 16.3 : Control ;	12682299, 12904577, 19648245, 22720735, 23002217, 27561249	no	2a : Function from experimental evidences in other organisms	2022-01-17	1	601195	601344	150
107	5	Bacillus thuringiensis C15	93118035	SEIU01_530077	CDS	automatic/finished	rpmGA	ribosomal protein L33		no	s : structure			16.2 : Construct biomass (Anabolism) ; 16.3 : Control ;	12682299, 12904577, 19648245, 22720735, 23002217, 27561249	no	2a : Function from experimental evidences in other organisms	2022-01-17	3	1786059	1786208	150
107	5	Pseudomonas sp. B10	93122715	SEIT01_260113	CDS	automatic/finished	rpmG	50S ribosomal subunit protein L33		no						no		2022-01-17	-1	1074711	1074866	156
107	5	Pseudomonas sp. SWI36 SWI36_1	77225823	SEIS01_1380024	CDS	automatic/finished	rpmG	50S ribosomal subunit protein L33		no						no		2020-07-15	3	2737599	2737754	156
107	5	Pseudomonas sp. SWI36 SWI36_2	77220918	SEIQ01_1450023	CDS	automatic/finished	rpmG	50S ribosomal subunit protein L33		no						no		2020-07-15	1	3528832	3528987	156
1089	5	Bacillus albus PFYN01	93132583	SEIR01_3570039	CDS	automatic/finished	fliI	flagellar-specific ATPase subunit of export apparatus	7.1.2.2	no	e : enzyme			16.5 : Explore ;	12787361, 16113269, 16780875, 17002279, 26916245	no	2a : Function from experimental evidences in other organisms	2022-01-17	1	4508281	4509585	1305
1089	5	Bacillus thuringiensis C15	93116197	SEIU01_10026	CDS	automatic/finished	fliI	flagellar-specific ATPase subunit of export apparatus	7.1.2.2	no	e : enzyme			16.5 : Explore ;	12787361, 16113269, 16780875, 17002279, 26916245	no	2a : Function from experimental evidences in other organisms	2022-01-17	3	20787	22091	1305
1089	5	Pseudomonas sp. B10	93126941	SEIT01_930006	CDS	automatic/finished	fliI	flagellum-specific ATP synthase FliI		no						no		2022-01-17	2	5629595	5630953	1359
1089	5	Pseudomonas sp. SWI36 SWI36_1	77225636	SEIS01_1350014	CDS	automatic/finished	fliI	flagellum-specific ATP synthase FliI		no						no		2020-07-15	-3	2553965	2555320	1356
1089	5	Pseudomonas sp. SWI36 SWI36_2	77221463	SEIQ01_1570014	CDS	automatic/finished	fliI	flagellum-specific ATP synthase FliI		no						no		2020-07-15	-3	4096079	4097434	1356
1130	5	Bacillus albus PFYN01	93132970	SEIR01_4230043	CDS	automatic/finished	dprA	DNA processing Smf single strand binding protein		no	f : factor			16.1 : Circulate ;	16014871, 16978360, 17803906, 18045469, 7768823, 23779106, 25138221, 28618091, 30050509	no	2a : Function from experimental evidences in other organisms	2022-01-17	2	4893029	4893898	870
1130	5	Bacillus thuringiensis C15	93119510	SEIU01_740189	CDS	automatic/finished	dprA	DNA processing Smf single strand binding protein		no	f : factor			16.1 : Circulate ;	16014871, 16978360, 17803906, 18045469, 7768823, 23779106, 25138221, 28618091, 30050509	no	2a : Function from experimental evidences in other organisms	2022-01-17	2	3182210	3183079	870
1130	5	Pseudomonas sp. B10	93125283	SEIT01_540161	CDS	automatic/finished	dprA	DNA-processing protein A		no						no		2022-01-17	3	3847647	3848747	1101
1130	5	Pseudomonas sp. SWI36 SWI36_1	77225131	SEIS01_1120133	CDS	automatic/finished		Rossmann fold nucleotide-binding protein Smf possibly involved in DNA uptake		no						no		2020-07-15	1	2047771	2048868	1098
1130	5	Pseudomonas sp. SWI36 SWI36_2	77219441	SEIQ01_1120034	CDS	automatic/finished		Rossmann fold nucleotide-binding protein Smf possibly involved in DNA uptake		no						no		2020-07-15	-2	1998396	1999493	1098
11462	5	Bacillus albus PFYN01	93133187	SEIR01_4280026	CDS	automatic/finished	cheR	putative methyltransferase Cher3	2.1.1.-	no						no	3 : Putative function from multiple computational evidences	2022-01-17	3	5105070	5105927	858
11462	5	Bacillus thuringiensis C15	93119169	SEIU01_700020	CDS	automatic/finished	cheR	putative methyltransferase Cher3	2.1.1.-	no						no	3 : Putative function from multiple computational evidences	2022-01-17	-3	2863637	2864494	858
11462	5	Pseudomonas sp. B10	93127306	SEIT01_1090029	CDS	automatic/finished	cheR	putative methyltransferase Cher3	2.1.1.-	no						no	3 : Putative function from multiple computational evidences	2022-01-17	-3	6016105	6016938	834
11462	5	Pseudomonas sp. SWI36 SWI36_1	77228246	SEIS01_1960009	CDS	automatic/finished	cheR	Putative methyltransferase Cher3	2.1.1.-	no						no	3 : Putative function from multiple computational evidences	2020-07-15	-2	5357247	5358068	822
11462	5	Pseudomonas sp. SWI36 SWI36_2	77222606	SEIQ01_1890023	CDS	automatic/finished	cheR	Putative methyltransferase Cher3	2.1.1.-	no						no	3 : Putative function from multiple computational evidences	2020-07-15	3	5310333	5311154	822
1149	5	Bacillus albus PFYN01	93133126	SEIR01_4260027	CDS	automatic/finished	yazA	putative UvrC-Intron-type (URI) endonuclease		no	e : enzyme			16.6 : Maintain ; 16.11 : Scavenge (Catabolism) ;	11483577	no	3 : Putative function from multiple computational evidences	2022-01-17	-2	5047819	5048109	291
1149	5	Bacillus thuringiensis C15	93118958	SEIU01_660008	CDS	automatic/finished	yazA	putative UvrC-Intron-type (URI) endonuclease		no	e : enzyme			16.6 : Maintain ; 16.11 : Scavenge (Catabolism) ;	11483577	no	3 : Putative function from multiple computational evidences	2022-01-17	3	2669397	2669687	291
1149	5	Pseudomonas sp. B10	93122582	SEIT01_250103	CDS	automatic/finished		putative endonuclease		no						no	3 : Putative function from multiple computational evidences	2022-01-17	2	941756	942058	303
1149	5	Pseudomonas sp. SWI36 SWI36_1	77223540	SEIS01_70005	CDS	automatic/finished		GIY-YIG nuclease family protein		no						no		2020-07-15	3	405399	405716	318
1149	5	Pseudomonas sp. SWI36 SWI36_2	77218049	SEIQ01_110005	CDS	automatic/finished		GIY-YIG nuclease family protein		no						no		2020-07-15	1	497338	497655	318
1153	5	Bacillus albus PFYN01	93130592	SEIR01_1570039	CDS	automatic/finished	ispA	farnesyl diphosphate synthase	2.5.1.10	no	e : enzyme			16.2 : Construct biomass (Anabolism) ;	8755734, 12682299, 17147392, 23569278	no	2a : Function from experimental evidences in other organisms	2022-01-17	-2	2727853	2728743	891
1153	5	Bacillus thuringiensis C15	93120378	SEIU01_960079	CDS	automatic/finished	ispA	farnesyl diphosphate synthase	2.5.1.10	no	e : enzyme			16.2 : Construct biomass (Anabolism) ;	8755734, 12682299, 17147392, 23569278	no	2a : Function from experimental evidences in other organisms	2022-01-17	2	4055657	4056547	891
1153	5	Pseudomonas sp. B10	93125858	SEIT01_650100	CDS	automatic/finished	ispA	geranyl diphosphate/farnesyl diphosphate synthase	2.5.1.1, 2.5.1.10	no						no		2022-01-17	1	4468174	4469061	888
1153	5	Pseudomonas sp. SWI36 SWI36_1	77228421	SEIS01_2040002	CDS	automatic/finished	ispA	geranyl diphosphate/farnesyl diphosphate synthase	2.5.1.1, 2.5.1.10	no						no		2020-07-15	-2	5536599	5537486	888
1153	5	Pseudomonas sp. SWI36 SWI36_2	77218568	SEIQ01_350074	CDS	automatic/finished	ispA	geranyl diphosphate/farnesyl diphosphate synthase	2.5.1.1, 2.5.1.10	no						no		2020-07-15	2	1084649	1085536	888
116	5	Bacillus albus PFYN01	93130731	SEIR01_1680046	CDS	automatic/finished	purD	phosphoribosylglycinamide synthetase	6.3.4.13	no	e : enzyme			16.2 : Construct biomass (Anabolism) ;	9683488, 12787499, 16321950	no	2a : Function from experimental evidences in other organisms	2022-01-17	-3	2850954	2852225	1272
116	5	Bacillus thuringiensis C15	93119874	SEIU01_850013	CDS	automatic/finished	purD	phosphoribosylglycinamide synthetase	6.3.4.13	no	e : enzyme			16.2 : Construct biomass (Anabolism) ;	9683488, 12787499, 16321950	no	2a : Function from experimental evidences in other organisms	2022-01-17	2	3553595	3554866	1272
116	5	Pseudomonas sp. B10	93124649	SEIT01_460014	CDS	automatic/finished	purD	phosphoribosylamine--glycine ligase	6.3.4.13	no						no		2022-01-17	-3	3178057	3179349	1293
116	5	Pseudomonas sp. SWI36 SWI36_1	77225772	SEIS01_1370030	CDS	automatic/finished	purD	phosphoribosylamine--glycine ligase	6.3.4.13	no						no		2020-07-15	-2	2690820	2692115	1296
116	5	Pseudomonas sp. SWI36 SWI36_2	77220767	SEIQ01_1430028	CDS	automatic/finished	purD	phosphoribosylamine--glycine ligase	6.3.4.13	no						no		2020-07-15	2	3374213	3375508	1296
1163	5	Bacillus albus PFYN01	93134404	SEIR01_4650012	CDS	automatic/finished	comGA	membrane associated ATPase of the pilin platform for DNA competence		no	e : enzyme			16.5 : Explore ; 16.11 : Scavenge (Catabolism) ;	11298275, 15528548, 16009134, 9723928, 21564336, 21707789, 25899641, 30806035, 31954084	no	2a : Function from experimental evidences in other organisms	2022-01-17	-2	6200506	6201549	1044
1163	5	Bacillus thuringiensis C15	93120312	SEIU01_960013	CDS	automatic/finished	comGA	membrane associated ATPase of the pilin platform for DNA competence		no	e : enzyme			16.5 : Explore ; 16.11 : Scavenge (Catabolism) ;	11298275, 15528548, 16009134, 9723928, 21564336, 21707789, 25899641, 30806035, 31954084	no	2a : Function from experimental evidences in other organisms	2022-01-17	3	4010448	4011491	1044
1163	5	Pseudomonas sp. B10	93121918	SEIT01_10224	CDS	automatic/finished	yggR	Type II/IV secretion system family protein		no						no		2022-01-17	-1	251109	252143	1035
1163	5	Pseudomonas sp. B10	93122123	SEIT01_20106	CDS	automatic/finished	pilB	Type IV pilus assembly ATPase PilB		no						no		2022-01-17	-1	459819	461519	1701
1163	5	Pseudomonas sp. B10	93122605	SEIT01_260003	CDS	automatic/finished	pilB	Type IV pilus assembly ATPase PilB		no						no		2022-01-17	2	968147	969931	1785
1163	5	Pseudomonas sp. B10	93123529	SEIT01_330062	CDS	automatic/finished	pilU	Type IV pilus ATPase PilU		no						no		2022-01-17	-1	1997130	1998239	1110
1163	5	Pseudomonas sp. B10	93125736	SEIT01_640014	CDS	automatic/finished	gspE	Type II secretion system protein GspE		no						no		2022-01-17	-3	4344271	4345677	1407
1163	5	Pseudomonas sp. B10	93126561	SEIT01_810013	CDS	automatic/finished		Type II/IV secretion system protein		no						no		2022-01-17	1	5235892	5237613	1722
1163	5	Pseudomonas sp. SWI36 SWI36_1	77224541	SEIS01_640010	CDS	automatic/finished	yggR	Type II/IV secretion system family protein		no						no		2020-07-15	2	1456118	1457008	891
1163	5	Pseudomonas sp. SWI36 SWI36_1	77224854	SEIS01_900059	CDS	automatic/finished	gspE	Type II secretion system protein GspE		no						no		2020-07-15	-1	1792990	1794438	1449
1163	5	Pseudomonas sp. SWI36 SWI36_1	77225928	SEIS01_1380129	CDS	automatic/finished		Type II secretory pathway, ATPase PulE/Tfp pilus assembly pathway, ATPase PilB		no						no		2020-07-15	-1	2850715	2852388	1674
1163	5	Pseudomonas sp. SWI36 SWI36_1	77227757	SEIS01_1810015	CDS	automatic/finished		General secretion pathway protein E		no						no		2020-07-15	1	4828057	4829853	1797
1163	5	Pseudomonas sp. SWI36 SWI36_2	77217828	SEIQ01_20008	CDS	automatic/finished		Type II secretory pathway, ATPase PulE/Tfp pilus assembly pathway, ATPase PilB		no						no		2020-07-15	3	263679	265352	1674
1163	5	Pseudomonas sp. SWI36 SWI36_2	77218980	SEIQ01_620010	CDS	automatic/finished	yggR	Type II/IV secretion system family protein		no						no		2020-07-15	1	1496143	1497021	879
1163	5	Pseudomonas sp. SWI36 SWI36_2	77222052	SEIQ01_1730013	CDS	automatic/finished		General secretion pathway protein E		no						no		2020-07-15	-3	4717304	4719100	1797
1163	5	Pseudomonas sp. SWI36 SWI36_2	77222782	SEIQ01_1970013	CDS	automatic/finished	gspE	Type II secretion system protein GspE		no						no		2020-07-15	2	5494139	5495587	1449
1170	5	Bacillus albus PFYN01	93129498	SEIR01_890001	CDS	automatic/finished		protein of unknown function		no	u : unknown	1 : Unknown				no	5 : Unknown function	2022-01-17	-3	1726587	1729055	2469
1170	5	Bacillus albus PFYN01	93131407	SEIR01_2230153	CDS	automatic/finished		DNA segregation ATPase FtsK/SpoIIIE, S-DNA-T family		no						no		2022-01-17	-2	3466540	3468123	1584
1170	5	Bacillus albus PFYN01	93133009	SEIR01_4230082	CDS	automatic/finished	spoIIIE	spore DNA directional translocase (motor ATPase)		no	cp : cell process			16.5 : Explore ; 16.13 : Shape ;	11062134, 11778051, 12618465, 16430687, 17139259, 17322320, 18160039, 24297254, 24769697, 26452092, 34728126	no	2a : Function from experimental evidences in other organisms	2022-01-17	3	4936419	4938800	2382
1170	5	Bacillus thuringiensis C15	93116857	SEIU01_240034	CDS	automatic/finished	spoIIIE	spore DNA directional translocase (motor ATPase)		no	cp : cell process			16.5 : Explore ; 16.13 : Shape ;	11062134, 11778051, 12618465, 16430687, 17139259, 17322320, 18160039, 24297254, 24769697, 26452092, 34728126	no	2a : Function from experimental evidences in other organisms	2022-01-17	1	678781	681162	2382
1170	5	Bacillus thuringiensis C15	93119239	SEIU01_720001	CDS	automatic/finished		protein of unknown function		no	u : unknown	1 : Unknown				no	5 : Unknown function	2022-01-17	-2	2926947	2928764	1818
1170	5	Bacillus thuringiensis C15	93120945	SEIU01_1070207	CDS	automatic/finished		DNA segregation ATPase FtsK/SpoIIIE, S-DNA-T family		no						no		2022-01-17	-2	4578714	4580312	1599
1170	5	Pseudomonas sp. B10	93127121	SEIT01_980108	CDS	automatic/finished	ftsK	DNA translocase FtsK		no						no		2022-01-17	2	5820842	5823250	2409
1170	5	Pseudomonas sp. SWI36 SWI36_1	77227024	SEIS01_1600032	CDS	automatic/finished	ftsK	DNA translocase FtsK		no						no		2020-07-15	-3	3980462	3982966	2505
1170	5	Pseudomonas sp. SWI36 SWI36_2	77221825	SEIQ01_1660055	CDS	automatic/finished	ftsK	DNA translocase FtsK		no						no		2020-07-15	2	4479737	4482241	2505
1176	5	Bacillus albus PFYN01	93132578	SEIR01_3570034	CDS	automatic/finished	flgC	flagellar component of cell-proximal portion of basal-body rod		no	s : structure			16.5 : Explore ;	1905667, 2129540, 2181149, 9657996	no	2a : Function from experimental evidences in other organisms	2022-01-17	1	4504264	4504677	414
1176	5	Bacillus thuringiensis C15	93116192	SEIU01_10021	CDS	automatic/finished	flgC	flagellar component of cell-proximal portion of basal-body rod		no	s : structure			16.5 : Explore ;	1905667, 2129540, 2181149, 9657996	no	2a : Function from experimental evidences in other organisms	2022-01-17	3	16770	17183	414
1176	5	Pseudomonas sp. B10	93126454	SEIT01_770009	CDS	automatic/finished	flgC	flagellar basal-body rod protein FlgC		no						no		2022-01-17	-2	5115032	5115475	444
1176	5	Pseudomonas sp. SWI36 SWI36_1	77225661	SEIS01_1350039	CDS	automatic/finished	flgC	flagellar basal-body rod protein FlgC		no						no		2020-07-15	-3	2580803	2581246	444
1176	5	Pseudomonas sp. SWI36 SWI36_2	77221489	SEIQ01_1570040	CDS	automatic/finished	flgC	flagellar basal-body rod protein FlgC		no						no		2020-07-15	-3	4122917	4123360	444
1186	5	Bacillus albus PFYN01	93133021	SEIR01_4230094	CDS	automatic/finished	pgsA	CDP-diacylglycerol-glycerol-3-phosphate 3-phosphatidyltransferase	2.7.8.5	no	e : enzyme			16.2 : Construct biomass (Anabolism) ; 16.13 : Shape ;	12682299, 15743965, 15849754, 16514141, 16850406, 27818647	no	2a : Function from experimental evidences in other organisms	2022-01-17	1	4950733	4951311	579
1186	5	Bacillus thuringiensis C15	93116869	SEIU01_240046	CDS	automatic/finished	pgsA	CDP-diacylglycerol-glycerol-3-phosphate 3-phosphatidyltransferase	2.7.8.5	no	e : enzyme			16.2 : Construct biomass (Anabolism) ; 16.13 : Shape ;	12682299, 15743965, 15849754, 16514141, 16850406, 27818647	no	2a : Function from experimental evidences in other organisms	2022-01-17	2	693095	693673	579
1186	5	Pseudomonas sp. B10	93123509	SEIT01_330042	CDS	automatic/finished	pgsA	CDP-diacylglycerol--glycerol-3-phosphate 3-phosphatidyltransferase	2.7.8.5	no						no		2022-01-17	-1	1969611	1970171	561
1186	5	Pseudomonas sp. SWI36 SWI36_1	77223847	SEIS01_220013	CDS	automatic/finished	pgsA	phosphatidylglycerophosphate synthase	2.7.8.5	no						no		2020-07-15	-2	717303	717863	561
1186	5	Pseudomonas sp. SWI36 SWI36_2	77222988	SEIQ01_2030007	CDS	automatic/finished	pgsA	phosphatidylglycerophosphate synthase	2.7.8.5	no						no		2020-07-15	2	5684258	5684818	561
124	5	Bacillus albus PFYN01	93128865	SEIR01_480007	CDS	automatic/finished	yodR	putative acyloate-acetoacetate CoA-transferase	2.8.3.-	no	e : enzyme			16.11 : Scavenge (Catabolism) ;	15150230, 21538109, 24914178	no	3 : Putative function from multiple computational evidences	2022-01-17	-2	1149352	1150014	663
124	5	Bacillus albus PFYN01	93128866	SEIR01_480008	CDS	automatic/finished	yodS	putative oxoacid CoA-transferase	2.8.3.-	no	e : enzyme			16.11 : Scavenge (Catabolism) ;	15150230, 21538109, 24914178	no	3 : Putative function from multiple computational evidences	2022-01-17	-3	1149999	1150697	699
124	5	Bacillus thuringiensis C15	93117589	SEIU01_500069	CDS	automatic/finished	yodS	putative oxoacid CoA-transferase	2.8.3.-	no	e : enzyme			16.11 : Scavenge (Catabolism) ;	15150230, 21538109, 24914178	no	3 : Putative function from multiple computational evidences	2022-01-17	3	1378563	1379261	699
124	5	Bacillus thuringiensis C15	93117590	SEIU01_500070	CDS	automatic/finished	yodR	putative acyloate-acetoacetate CoA-transferase	2.8.3.-	no	e : enzyme			16.11 : Scavenge (Catabolism) ;	15150230, 21538109, 24914178	no	3 : Putative function from multiple computational evidences	2022-01-17	2	1379246	1379908	663
124	5	Pseudomonas sp. B10	93126084	SEIT01_690019	CDS	automatic/finished	atoD	acetyl-CoA:acetoacetyl-CoA transferase subunit alpha	2.8.3.9	no						no		2022-01-17	2	4694633	4695331	699
124	5	Pseudomonas sp. B10	93126085	SEIT01_690020	CDS	automatic/finished	atoA	acetyl-CoA:acetoacetyl-CoA transferase subunit beta	2.8.3.9	no						no		2022-01-17	2	4695356	4696021	666
124	5	Pseudomonas sp. SWI36 SWI36_1	77223153	SEIS01_10010	CDS	automatic/finished	atoD	acetyl-CoA:acetoacetyl-CoA transferase subunit alpha	2.8.3.9	no						no		2020-07-15	3	10677	11375	699
124	5	Pseudomonas sp. SWI36 SWI36_1	77223154	SEIS01_10011	CDS	automatic/finished	atoA	acetyl-CoA:acetoacetyl-CoA transferase subunit beta	2.8.3.9	no						no		2020-07-15	2	11411	12067	657
124	5	Pseudomonas sp. SWI36 SWI36_1	77225023	SEIS01_1120025	CDS	automatic/finished	atoD	acetyl-CoA:acetoacetyl-CoA transferase subunit alpha	2.8.3.9	no						no		2020-07-15	2	1944605	1945300	696
124	5	Pseudomonas sp. SWI36 SWI36_1	77225024	SEIS01_1120026	CDS	automatic/finished	atoA	acetyl-CoA:acetoacetyl-CoA transferase subunit beta	2.8.3.9	no						no		2020-07-15	1	1945309	1945950	642
124	5	Pseudomonas sp. SWI36 SWI36_1	77226997	SEIS01_1600005	CDS	automatic/finished	atoD	acetyl-CoA:acetoacetyl-CoA transferase subunit alpha	2.8.3.9	no						no		2020-07-15	1	3952252	3952947	696
124	5	Pseudomonas sp. SWI36 SWI36_1	77226998	SEIS01_1600006	CDS	automatic/finished	atoA	acetyl-CoA:acetoacetyl-CoA transferase subunit beta	2.8.3.9	no						no		2020-07-15	3	3952956	3953597	642
124	5	Pseudomonas sp. SWI36 SWI36_2	77219545	SEIQ01_1120138	CDS	automatic/finished	atoA	acetyl-CoA:acetoacetyl-CoA transferase subunit beta	2.8.3.9	no						no		2020-07-15	-2	2101314	2101955	642
124	5	Pseudomonas sp. SWI36 SWI36_2	77219546	SEIQ01_1120139	CDS	automatic/finished	atoD	acetyl-CoA:acetoacetyl-CoA transferase subunit alpha	2.8.3.9	no						no		2020-07-15	-3	2101964	2102659	696
124	5	Pseudomonas sp. SWI36 SWI36_2	77220830	SEIQ01_1440044	CDS	automatic/finished	atoA	acetyl-CoA:acetoacetyl-CoA transferase subunit beta	2.8.3.9	no						no		2020-07-15	-3	3440924	3441580	657
124	5	Pseudomonas sp. SWI36 SWI36_2	77220831	SEIQ01_1440045	CDS	automatic/finished	atoD	acetyl-CoA:acetoacetyl-CoA transferase subunit alpha	2.8.3.9	no						no		2020-07-15	-1	3441616	3442314	699
124	5	Pseudomonas sp. SWI36 SWI36_2	77221850	SEIQ01_1660080	CDS	automatic/finished	atoA	acetyl-CoA:acetoacetyl-CoA transferase subunit beta	2.8.3.9	no						no		2020-07-15	-1	4509106	4509747	642
124	5	Pseudomonas sp. SWI36 SWI36_2	77221851	SEIQ01_1660081	CDS	automatic/finished	atoD	acetyl-CoA:acetoacetyl-CoA transferase subunit alpha	2.8.3.9	no						no		2020-07-15	-2	4509756	4510451	696
1244	5	Bacillus albus PFYN01	93129546	SEIR01_900040	CDS	automatic/finished	phaJ	(R)-specific enoyl-CoA hydratase	4.2.1.119	no						no		2022-01-17	1	1768525	1768968	444
1244	5	Bacillus albus PFYN01	93130579	SEIR01_1570026	CDS	automatic/finished	ptb	phosphate BCFA and butyryl coenzyme A transferase	2.3.1.19, 2.3.1.-	no	e : enzyme			16.2 : Construct biomass (Anabolism) ; 16.8 : Protect ;	10094682, 12427936, 15241682, 22720735, 28165735	no	2a : Function from experimental evidences in other organisms	2022-01-17	-3	2714148	2715047	900
1244	5	Bacillus thuringiensis C15	93117136	SEIU01_460040	CDS	automatic/finished	phaJ	(R)-specific enoyl-CoA hydratase	4.2.1.119	no						no		2022-01-17	-2	959952	960395	444
1244	5	Bacillus thuringiensis C15	93120390	SEIU01_960091	CDS	automatic/finished	ptb	phosphate BCFA and butyryl coenzyme A transferase	2.3.1.19, 2.3.1.-	no	e : enzyme			16.2 : Construct biomass (Anabolism) ; 16.8 : Protect ;	10094682, 12427936, 15241682, 22720735, 28165735	no	2a : Function from experimental evidences in other organisms	2022-01-17	2	4069355	4070254	900
1244	5	Pseudomonas sp. B10	93126592	SEIT01_820020	CDS	automatic/finished	croR	3-hydroxybutyryl-CoA dehydratase	4.2.1.55	no						no		2022-01-17	2	5261249	5261719	471
1244	5	Pseudomonas sp. SWI36 SWI36_1	77227937	SEIS01_1850027	CDS	automatic/finished		enoyl-CoA hydratase, R-specific		no						no		2020-07-15	-2	5016486	5016956	471
1244	5	Pseudomonas sp. SWI36 SWI36_2	77218829	SEIQ01_550005	CDS	automatic/finished		enoyl-CoA hydratase, R-specific		no						no		2020-07-15	-2	1362486	1362956	471
125	5	Bacillus albus PFYN01	93130743	SEIR01_1680058	CDS	automatic/finished	purE	N5-carboxyaminoimidazole ribonucleotide mutase	5.4.99.18	no	e : enzyme			16.2 : Construct biomass (Anabolism) ;	12787499, 16138311, 9683488	no	2a : Function from experimental evidences in other organisms	2022-01-17	-2	2863414	2863899	486
125	5	Bacillus thuringiensis C15	93119863	SEIU01_850002	CDS	automatic/finished	purE	N5-carboxyaminoimidazole ribonucleotide mutase	5.4.99.18	no	e : enzyme			16.2 : Construct biomass (Anabolism) ;	12787499, 16138311, 9683488	no	2a : Function from experimental evidences in other organisms	2022-01-17	1	3541765	3542250	486
125	5	Pseudomonas sp. B10	93125173	SEIT01_540051	CDS	automatic/finished	purE	N(5)-carboxyaminoimidazole ribonucleotide mutase	5.4.99.18	no						no		2022-01-17	-1	3720753	3721244	492
125	5	Pseudomonas sp. SWI36 SWI36_1	77228043	SEIS01_1900003	CDS	automatic/finished	purE	N(5)-carboxyaminoimidazole ribonucleotide mutase	5.4.99.18	no						no		2020-07-15	3	5133651	5134142	492
125	5	Pseudomonas sp. SWI36 SWI36_2	77222398	SEIQ01_1840003	CDS	automatic/finished	purE	N(5)-carboxyaminoimidazole ribonucleotide mutase	5.4.99.18	no						no		2020-07-15	2	5098922	5099413	492
1252	5	Bacillus albus PFYN01	93132563	SEIR01_3570019	CDS	automatic/finished	cheA	chemotactic two-component sensor histidine kinase	2.7.3.-	no	rc : receptor			16.3 : Control ; 16.12 : Sense ;	12094812, 12864845, 12920116, 15451661, 16045621, 21515776, 22355139	no	2a : Function from experimental evidences in other organisms	2022-01-17	3	4490790	4492808	2019
1252	5	Bacillus thuringiensis C15	93116177	SEIU01_10006	CDS	automatic/finished	cheA	chemotactic two-component sensor histidine kinase	2.7.3.-	no	rc : receptor			16.3 : Control ; 16.12 : Sense ;	12094812, 12864845, 12920116, 15451661, 16045621, 21515776, 22355139	no	2a : Function from experimental evidences in other organisms	2022-01-17	2	3266	5284	2019
1252	5	Pseudomonas sp. B10	93125622	SEIT01_610042	CDS	automatic/finished		two-component system, chemotaxis family, sensor kinase CheA	2.7.13.3	no						no		2022-01-17	-3	4217452	4219722	2271
1252	5	Pseudomonas sp. SWI36 SWI36_1	77227988	SEIS01_1870021	CDS	automatic/finished		Signal transduction histidine kinase CheA	2.7.3.-	no						no		2020-07-15	-3	5068511	5070754	2244
1252	5	Pseudomonas sp. SWI36 SWI36_2	77222279	SEIQ01_1790007	CDS	automatic/finished		Signal transduction histidine kinase CheA	2.7.3.-	no						no		2020-07-15	2	4968578	4970821	2244
1254	5	Bacillus albus PFYN01	93133035	SEIR01_4240004	CDS	automatic/finished	yqgX	putative metal-binding hydrolase	3.-.-.-	no	e : enzyme			16.6 : Maintain ; 16.11 : Scavenge (Catabolism) ;	20669241, 22333191	no	3 : Putative function from multiple computational evidences	2022-01-17	-3	4964031	4964660	630
1254	5	Bacillus thuringiensis C15	93118040	SEIU01_530082	CDS	automatic/finished	yqgX	putative metal-binding hydrolase	3.-.-.-	no	e : enzyme			16.6 : Maintain ; 16.11 : Scavenge (Catabolism) ;	20669241, 22333191	no	3 : Putative function from multiple computational evidences	2022-01-17	1	1788625	1789254	630
1254	5	Pseudomonas sp. B10	93122789	SEIT01_270046	CDS	automatic/finished		hydroxyacylglutathione hydrolase	3.1.2.6	no						no		2022-01-17	-1	1146312	1146956	645
1254	5	Pseudomonas sp. SWI36 SWI36_1	77227526	SEIS01_1730024	CDS	automatic/finished		Beta-lactamase		no						no		2020-07-15	1	4579921	4580565	645
1254	5	Pseudomonas sp. SWI36 SWI36_2	77218672	SEIQ01_450009	CDS	automatic/finished		Beta-lactamase		no						no		2020-07-15	-1	1201528	1202172	645
126	5	Bacillus albus PFYN01	93131200	SEIR01_2120052	CDS	automatic/finished	aqpZ	Aquaporin Z		no						no		2022-01-17	2	3284771	3285436	666
126	5	Bacillus thuringiensis C15	93120761	SEIU01_1070023	CDS	automatic/finished	aqpZ	Aquaporin Z		no						no		2022-01-17	2	4407038	4407703	666
126	5	Pseudomonas sp. B10	93122211	SEIT01_130016	CDS	automatic/finished	aqpZ	water channel AqpZ		no						no		2022-01-17	3	556527	557222	696
126	5	Pseudomonas sp. SWI36 SWI36_1	77227387	SEIS01_1700030	CDS	automatic/finished	aqpZ	water channel AqpZ		no						no		2020-07-15	-2	4417911	4418609	699
126	5	Pseudomonas sp. SWI36 SWI36_2	77221886	SEIQ01_1670030	CDS	automatic/finished	aqpZ	water channel AqpZ		no						no		2020-07-15	-1	4547089	4547787	699
1310	5	Bacillus albus PFYN01	93127599	SEIR01_10038	CDS	automatic/finished		diguanylate cyclase	2.7.7.65	no						no		2022-01-17	3	34512	37241	2730
1310	5	Bacillus albus PFYN01	93127648	SEIR01_10087	CDS	automatic/finished		diguanylate cyclase	2.7.7.65	no						no		2022-01-17	3	80049	82727	2679
1310	5	Bacillus albus PFYN01	93128638	SEIR01_370004	CDS	automatic/finished		diguanylate cyclase	2.7.7.65	no						no		2022-01-17	-3	950871	953600	2730
1310	5	Bacillus albus PFYN01	93132672	SEIR01_3790027	CDS	automatic/finished		diguanylate cyclase	2.7.7.65	no						no		2022-01-17	-2	4615777	4618497	2721
1310	5	Bacillus thuringiensis C15	93116437	SEIU01_20004	CDS	automatic/finished		diguanylate cyclase	2.7.7.65	no						no		2022-01-17	3	254097	256826	2730
1310	5	Bacillus thuringiensis C15	93116485	SEIU01_20052	CDS	automatic/finished		diguanylate cyclase	2.7.7.65	no						no		2022-01-17	1	299998	302676	2679
1310	5	Bacillus thuringiensis C15	93116905	SEIU01_240082	CDS	automatic/finished		diguanylate cyclase	2.7.7.65	no						no		2022-01-17	-3	734333	737053	2721
1310	5	Pseudomonas sp. B10	93121747	SEIT01_10053	CDS	automatic/finished		diguanylate cyclase	2.7.7.65	no						no		2022-01-17	2	56282	60028	3747
1310	5	Pseudomonas sp. B10	93123388	SEIT01_320119	CDS	automatic/finished		diguanylate cyclase	2.7.7.65	no						no		2022-01-17	-1	1835142	1837838	2697
1310	5	Pseudomonas sp. B10	93123718	SEIT01_350071	CDS	automatic/finished		c-di-GMP phosphodiesterase	3.1.4.52	no						no		2022-01-17	2	2187188	2188804	1617
1310	5	Pseudomonas sp. B10	93125197	SEIT01_540075	CDS	automatic/finished		diguanylate cyclase	2.7.7.65	no						no		2022-01-17	-3	3750628	3753501	2874
1310	5	Pseudomonas sp. B10	93125448	SEIT01_580017	CDS	automatic/finished		diguanylate cyclase	2.7.7.65	no						no		2022-01-17	-2	4037312	4039231	1920
1310	5	Pseudomonas sp. B10	93126312	SEIT01_760043	CDS	automatic/finished		diguanylate cyclase	2.7.7.65	no						no		2022-01-17	1	4973800	4976262	2463
1310	5	Pseudomonas sp. B10	93126671	SEIT01_860009	CDS	automatic/finished		diguanylate cyclase	2.7.7.65	no						no		2022-01-17	-2	5347076	5350354	3279
1310	5	Pseudomonas sp. B10	93126882	SEIT01_890013	CDS	automatic/finished		membrane protein of unknown function		no	u : unknown	1 : Unknown				no	5 : Unknown function	2022-01-17	2	5568374	5568874	501
1310	5	Pseudomonas sp. B10	93126883	SEIT01_890014	CDS	automatic/finished		diguanylate cyclase	2.7.7.65	no						no		2022-01-17	3	5568945	5569820	876
1310	5	Pseudomonas sp. SWI36 SWI36_1	77223623	SEIS01_120006	CDS	automatic/finished		Diguanylate cyclase/phosphodiesterase with PAS/PAC and GAF sensor		no						no		2020-07-15	3	490806	492494	1689
1310	5	Pseudomonas sp. SWI36 SWI36_1	77223860	SEIS01_230007	CDS	automatic/finished		Bifunctional diguanylate cyclase/phosphodiesterase		no						no		2020-07-15	-2	728037	731333	3297
1310	5	Pseudomonas sp. SWI36 SWI36_1	77224597	SEIS01_680031	CDS	automatic/finished		Sensory box/GGDEF family protein		no						no		2020-07-15	-3	1515308	1517764	2457
1310	5	Pseudomonas sp. SWI36 SWI36_1	77226642	SEIS01_1510015	CDS	automatic/finished		Sensory box/GGDEF family protein		no						no		2020-07-15	3	3580404	3584147	3744
1310	5	Pseudomonas sp. SWI36 SWI36_1	77226759	SEIS01_1540004	CDS	automatic/finished		Sensory box/GGDEF family protein		no						no		2020-07-15	2	3704156	3706051	1896
1310	5	Pseudomonas sp. SWI36 SWI36_1	77226845	SEIS01_1560008	CDS	automatic/finished		Cyclic-guanylate-specific phosphodiesterase	3.1.4.52	no						no		2020-07-15	3	3791898	3793496	1599
1310	5	Pseudomonas sp. SWI36 SWI36_1	77227329	SEIS01_1680018	CDS	automatic/finished		Diguanylate cyclase/phosphodiesterase		no						no		2020-07-15	-3	4339157	4341244	2088
1310	5	Pseudomonas sp. SWI36 SWI36_1	77227830	SEIS01_1820061	CDS	automatic/finished		Diguanylate cyclase/phosphodiesterase with PAS/PAC sensor(S)		no						no		2020-07-15	-1	4899913	4902012	2100
1310	5	Pseudomonas sp. SWI36 SWI36_1	77228183	SEIS01_1930065	CDS	automatic/finished		Sensory box/GGDEF family protein		no						no		2020-07-15	-2	5276361	5279051	2691
1310	5	Pseudomonas sp. SWI36 SWI36_2	77218144	SEIQ01_130065	CDS	automatic/finished		Sensory box/GGDEF family protein		no						no		2020-07-15	-3	594947	597637	2691
1310	5	Pseudomonas sp. SWI36 SWI36_2	77218181	SEIQ01_150006	CDS	automatic/finished		Diguanylate cyclase/phosphodiesterase with PAS/PAC and GAF sensor		no						no		2020-07-15	1	641893	643581	1689
1310	5	Pseudomonas sp. SWI36 SWI36_2	77218393	SEIQ01_250007	CDS	automatic/finished		Bifunctional diguanylate cyclase/phosphodiesterase		no						no		2020-07-15	3	871626	874922	3297
1310	5	Pseudomonas sp. SWI36 SWI36_2	77219260	SEIQ01_900031	CDS	automatic/finished		Sensory box/GGDEF family protein		no						no		2020-07-15	-3	1820087	1822543	2457
1310	5	Pseudomonas sp. SWI36 SWI36_2	77220310	SEIQ01_1340010	CDS	automatic/finished		Diguanylate cyclase/phosphodiesterase		no						no		2020-07-15	2	2900978	2903065	2088
1310	5	Pseudomonas sp. SWI36 SWI36_2	77220725	SEIQ01_1420026	CDS	automatic/finished		Sensory box/GGDEF family protein		no						no		2020-07-15	-1	3330391	3334134	3744
1310	5	Pseudomonas sp. SWI36 SWI36_2	77221139	SEIQ01_1500037	CDS	automatic/finished		Sensory box/GGDEF family protein		no						no		2020-07-15	-1	3768364	3770259	1896
1310	5	Pseudomonas sp. SWI36 SWI36_2	77221219	SEIQ01_1520034	CDS	automatic/finished		Cyclic-guanylate-specific phosphodiesterase	3.1.4.52	no						no		2020-07-15	-2	3849006	3850604	1599
1310	5	Pseudomonas sp. SWI36 SWI36_2	77222522	SEIQ01_1880031	CDS	automatic/finished		Diguanylate cyclase/phosphodiesterase with PAS/PAC sensor(S)		no						no		2020-07-15	1	5229028	5231127	2100
141	5	Bacillus albus PFYN01	93130734	SEIR01_1680049	CDS	automatic/finished	purM	phosphoribosylaminoimidazole synthetase	6.3.3.1	no	e : enzyme			16.2 : Construct biomass (Anabolism) ;	9683488, 10508786, 12787499, 16321950	no	2a : Function from experimental evidences in other organisms	2022-01-17	-1	2854478	2855518	1041
141	5	Bacillus thuringiensis C15	93119871	SEIU01_850010	CDS	automatic/finished	purM	phosphoribosylaminoimidazole synthetase	6.3.3.1	no	e : enzyme			16.2 : Construct biomass (Anabolism) ;	9683488, 10508786, 12787499, 16321950	no	2a : Function from experimental evidences in other organisms	2022-01-17	3	3550146	3551186	1041
141	5	Pseudomonas sp. B10	93124591	SEIT01_450025	CDS	automatic/finished	purM	phosphoribosylformylglycinamide cyclo-ligase	6.3.3.1	no						no		2022-01-17	-1	3112161	3113219	1059
141	5	Pseudomonas sp. SWI36 SWI36_1	77227184	SEIS01_1640012	CDS	automatic/finished	purM	phosphoribosylformylglycinamide cyclo-ligase	6.3.3.1	no						no		2020-07-15	-3	4186196	4187254	1059
141	5	Pseudomonas sp. SWI36 SWI36_2	77221621	SEIQ01_1610012	CDS	automatic/finished	purM	phosphoribosylformylglycinamide cyclo-ligase	6.3.3.1	no						no		2020-07-15	-2	4249893	4250951	1059
14188	5	Bacillus albus PFYN01	93134696	SEIR01_4750010	CDS	automatic/finished	arsC	thioredoxin-coupled arsenate reductase; skin element	1.20.4.4	no	e : enzyme			16.5 : Explore ; 16.8 : Protect ;	11698660, 16192272, 16905151, 8760915, 8969508, 9537360, 17303556, 21258851, 21904062, 23813734	no	2a : Function from experimental evidences in other organisms	2022-01-17	-3	6462807	6463211	405
14188	5	Bacillus thuringiensis C15	93120731	SEIU01_1060008	CDS	automatic/finished	arsC	thioredoxin-coupled arsenate reductase; skin element	1.20.4.4	no	e : enzyme			16.5 : Explore ; 16.8 : Protect ;	11698660, 16192272, 16905151, 8760915, 8969508, 9537360, 17303556, 21258851, 21904062, 23813734	no	2a : Function from experimental evidences in other organisms	2022-01-17	3	4378356	4378760	405
14188	5	Pseudomonas sp. B10	93126724	SEIT01_870045	CDS	automatic/finished		arsenate reductase (thioredoxin)	1.20.4.4	no						no		2022-01-17	3	5397006	5397476	471
14188	5	Pseudomonas sp. SWI36 SWI36_1	77223669	SEIS01_130038	CDS	automatic/finished		Arsenate reductase	1.20.4.1	no						no		2020-07-15	-1	538615	539085	471
14188	5	Pseudomonas sp. SWI36 SWI36_1	77225037	SEIS01_1120039	CDS	automatic/finished		Arsenate reductase	1.20.4.1	no						no		2020-07-15	-2	1954626	1955150	525
14188	5	Pseudomonas sp. SWI36 SWI36_1	77225039	SEIS01_1120041	CDS	automatic/finished		Arsenate reductase	1.20.4.1	no						no		2020-07-15	-2	1955481	1955894	414
14188	5	Pseudomonas sp. SWI36 SWI36_2	77218720	SEIQ01_460048	CDS	automatic/finished		Arsenate reductase	1.20.4.1	no						no		2020-07-15	3	1246641	1247111	471
14188	5	Pseudomonas sp. SWI36 SWI36_2	77219531	SEIQ01_1120124	CDS	automatic/finished		Arsenate reductase	1.20.4.1	no						no		2020-07-15	1	2091370	2091783	414
14188	5	Pseudomonas sp. SWI36 SWI36_2	77219533	SEIQ01_1120126	CDS	automatic/finished		Arsenate reductase	1.20.4.1	no						no		2020-07-15	1	2092114	2092638	525
142	5	Bacillus albus PFYN01	93134191	SEIR01_4560105	CDS	automatic/finished		Lrp/AsnC family transcriptional regulator, leucine-responsive regulatory protein		no						no		2022-01-17	3	6025446	6025940	495
142	5	Bacillus thuringiensis C15	93117787	SEIU01_520103	CDS	automatic/finished		Lrp/AsnC family transcriptional regulator, leucine-responsive regulatory protein		no						no		2022-01-17	3	1561458	1561952	495
142	5	Pseudomonas sp. B10	93122351	SEIT01_240002	CDS	automatic/finished	doeX	Transcriptional regulatory protein DoeX		no						no		2022-01-17	-2	697349	697837	489
142	5	Pseudomonas sp. B10	93122603	SEIT01_260001	CDS	automatic/finished	decR	DNA-binding transcriptional activator DecR		no						no		2022-01-17	-2	967121	967591	471
142	5	Pseudomonas sp. B10	93122703	SEIT01_260101	CDS	automatic/finished	lrp	DNA-binding transcriptional dual regulator Lrp		no						no		2022-01-17	3	1064598	1065086	489
142	5	Pseudomonas sp. B10	93125777	SEIT01_650019	CDS	automatic/finished	lrp	Leucine-responsive regulatory protein		no						no		2022-01-17	3	4383084	4383563	480
142	5	Pseudomonas sp. B10	93126046	SEIT01_680027	CDS	automatic/finished	bkdR	Bkd operon transcriptional regulator		no						no		2022-01-17	2	4660604	4661092	489
142	5	Pseudomonas sp. SWI36 SWI36_1	77224204	SEIS01_410002	CDS	automatic/finished	lrp	Leucine-responsive regulatory protein		no						no		2020-07-15	-1	1095802	1096278	477
142	5	Pseudomonas sp. SWI36 SWI36_1	77224346	SEIS01_500005	CDS	automatic/finished		Transcriptional regulator, AsnC family		no						no		2020-07-15	-2	1266522	1267001	480
142	5	Pseudomonas sp. SWI36 SWI36_1	77225671	SEIS01_1350049	CDS	automatic/finished	bkdR	Bkd operon transcriptional regulator		no						no		2020-07-15	-2	2589627	2590112	486
142	5	Pseudomonas sp. SWI36 SWI36_1	77225833	SEIS01_1380034	CDS	automatic/finished	lrp	DNA-binding transcriptional dual regulator Lrp		no						no		2020-07-15	-2	2746890	2747378	489
142	5	Pseudomonas sp. SWI36 SWI36_1	77225931	SEIS01_1380132	CDS	automatic/finished		Transcriptional regulator, AsnC family		no						no		2020-07-15	3	2852979	2853449	471
142	5	Pseudomonas sp. SWI36 SWI36_1	77227677	SEIS01_1780018	CDS	automatic/finished	decR	DNA-binding transcriptional activator DecR		no						no		2020-07-15	1	4731508	4731969	462
142	5	Pseudomonas sp. SWI36 SWI36_1	77227807	SEIS01_1820038	CDS	automatic/finished		Transcriptional regulator, AsnC family		no						no		2020-07-15	2	4873817	4874269	453
142	5	Pseudomonas sp. SWI36 SWI36_2	77217825	SEIQ01_20005	CDS	automatic/finished		Transcriptional regulator, AsnC family		no						no		2020-07-15	-1	262618	263088	471
142	5	Pseudomonas sp. SWI36 SWI36_2	77218766	SEIQ01_480005	CDS	automatic/finished		Transcriptional regulator, AsnC family		no						no		2020-07-15	-2	1299285	1299764	480
142	5	Pseudomonas sp. SWI36 SWI36_2	77220512	SEIQ01_1380014	CDS	automatic/finished	decR	DNA-binding transcriptional activator DecR		no						no		2020-07-15	-3	3119138	3119599	462
142	5	Pseudomonas sp. SWI36 SWI36_2	77220928	SEIQ01_1450033	CDS	automatic/finished	lrp	DNA-binding transcriptional dual regulator Lrp		no						no		2020-07-15	-1	3538123	3538611	489
142	5	Pseudomonas sp. SWI36 SWI36_2	77221308	SEIQ01_1550002	CDS	automatic/finished	lrp	Leucine-responsive regulatory protein		no						no		2020-07-15	-2	3937497	3937973	477
142	5	Pseudomonas sp. SWI36 SWI36_2	77221725	SEIQ01_1640023	CDS	automatic/finished	bkdR	Bkd operon transcriptional regulator		no						no		2020-07-15	1	4369714	4370199	486
142	5	Pseudomonas sp. SWI36 SWI36_2	77222545	SEIQ01_1880054	CDS	automatic/finished		Transcriptional regulator, AsnC family		no						no		2020-07-15	-2	5256771	5257223	453
145	5	Bacillus albus PFYN01	93132729	SEIR01_3900029	CDS	automatic/finished	glpK	glycerol kinase (sn-glycerol-3-phosphate generating)	2.7.1.30	no	e : enzyme			16.2 : Construct biomass (Anabolism) ;	9972264, 10920256, 11929549, 22720735	no	2a : Function from experimental evidences in other organisms	2022-01-17	-2	4667488	4668978	1491
145	5	Bacillus thuringiensis C15	93121056	SEIU01_1140009	CDS	automatic/finished	glpK	glycerol kinase (sn-glycerol-3-phosphate generating)	2.7.1.30	no	e : enzyme			16.2 : Construct biomass (Anabolism) ;	9972264, 10920256, 11929549, 22720735	no	2a : Function from experimental evidences in other organisms	2022-01-17	-2	4676568	4678058	1491
145	5	Pseudomonas sp. B10	93123570	SEIT01_340017	CDS	automatic/finished	glpK	glycerol kinase	2.7.1.30	no						no		2022-01-17	-2	2046647	2048149	1503
145	5	Pseudomonas sp. SWI36 SWI36_1	77224823	SEIS01_900028	CDS	automatic/finished	glpK	glycerol kinase	2.7.1.30	no						no		2020-07-15	1	1756561	1758060	1500
145	5	Pseudomonas sp. SWI36 SWI36_2	77220424	SEIQ01_1360024	CDS	automatic/finished	glpK	glycerol kinase	2.7.1.30	no						no		2020-07-15	-3	3030278	3031777	1500
14733	5	Bacillus albus PFYN01	93132413	SEIR01_3350014	CDS	automatic/finished	aceA	isocitrate lyase	4.1.3.1	no						no		2022-01-17	-2	4366312	4367589	1278
14733	5	Bacillus thuringiensis C15	93118278	SEIU01_570032	CDS	automatic/finished	aceA	isocitrate lyase	4.1.3.1	no						no		2022-01-17	-3	2014226	2015503	1278
14733	5	Pseudomonas sp. B10	93127102	SEIT01_980089	CDS	automatic/finished	aceA	isocitrate lyase	4.1.3.1	no						no		2022-01-17	-1	5802042	5803367	1326
14733	5	Pseudomonas sp. SWI36 SWI36_1	77225343	SEIS01_1300014	CDS	automatic/finished	aceA	isocitrate lyase	4.1.3.1	no						no		2020-07-15	1	2247427	2248752	1326
14733	5	Pseudomonas sp. SWI36 SWI36_2	77219846	SEIQ01_1260043	CDS	automatic/finished	aceA	isocitrate lyase	4.1.3.1	no						no		2020-07-15	-3	2396477	2397802	1326
14898	5	Bacillus albus PFYN01	93132866	SEIR01_4210010	CDS	automatic/finished		osmoprotectant transport system permease protein		no						no		2022-01-17	-1	4795193	4796704	1512
14898	5	Bacillus thuringiensis C15	93117575	SEIU01_500055	CDS	automatic/finished		osmoprotectant transport system permease protein		no						no		2022-01-17	2	1361627	1363138	1512
14898	5	Pseudomonas sp. B10	93124357	SEIT01_430076	CDS	automatic/finished	osmY	Osmoprotectant import permease protein OsmY		no						no		2022-01-17	1	2857705	2858421	717
14898	5	Pseudomonas sp. B10	93124359	SEIT01_430078	CDS	automatic/finished	yehW	glycine betaine ABC transporter membrane subunit YehW		no						no		2022-01-17	1	2859349	2860002	654
14898	5	Pseudomonas sp. SWI36 SWI36_1	77226744	SEIS01_1530028	CDS	automatic/finished	osmY	Osmoprotectant import permease protein OsmY		no						no		2020-07-15	3	3684402	3685115	714
14898	5	Pseudomonas sp. SWI36 SWI36_1	77226746	SEIS01_1530030	CDS	automatic/finished	yehW	glycine betaine ABC transporter membrane subunit YehW		no						no		2020-07-15	3	3686037	3686690	654
14898	5	Pseudomonas sp. SWI36 SWI36_2	77221000	SEIQ01_1470010	CDS	automatic/finished	yehW	glycine betaine ABC transporter membrane subunit YehW		no						no		2020-07-15	-3	3613343	3613996	654
14898	5	Pseudomonas sp. SWI36 SWI36_2	77221002	SEIQ01_1470012	CDS	automatic/finished	osmY	Osmoprotectant import permease protein OsmY		no						no		2020-07-15	-3	3614918	3615631	714
150	5	Bacillus albus PFYN01	93134511	SEIR01_4670074	CDS	automatic/finished	cydA	Cytochrome bd ubiquinol oxidase subunit 1	1.10.3.-	no						no		2022-01-17	-1	6306506	6307855	1350
150	5	Bacillus albus PFYN01	93134710	SEIR01_4760006	CDS	automatic/finished	cydA	cytochrome bb' ubiquinol oxidase (subunit I)	1.10.3.-	no	e : enzyme			16.10 : Respire ;	9852001, 10551842, 15231791, 15849754, 16850406	no	2a : Function from experimental evidences in other organisms	2022-01-17	-2	6476890	6478293	1404
150	5	Bacillus thuringiensis C15	93116428	SEIU01_10257	CDS	automatic/finished	cydA	cytochrome bb' ubiquinol oxidase (subunit I)	1.10.3.-	no	e : enzyme			16.10 : Respire ;	9852001, 10551842, 15231791, 15849754, 16850406	no	2a : Function from experimental evidences in other organisms	2022-01-17	3	244935	246338	1404
150	5	Bacillus thuringiensis C15	93117242	SEIU01_470028	CDS	automatic/finished	cydA	Cytochrome bd ubiquinol oxidase subunit 1	1.10.3.-	no						no		2022-01-17	2	1043336	1044685	1350
150	5	Pseudomonas sp. B10	93122048	SEIT01_20031	CDS	automatic/finished		cytochrome bd ubiquinol oxidase subunit I	7.1.1.7	no						no		2022-01-17	3	383232	384668	1437
150	5	Pseudomonas sp. B10	93123090	SEIT01_300023	CDS	automatic/finished		cytochrome bd ubiquinol oxidase subunit I	7.1.1.7	no						no		2022-01-17	1	1513342	1514793	1452
150	5	Pseudomonas sp. SWI36 SWI36_1	77225598	SEIS01_1340033	CDS	automatic/finished		putative Cytochrome bd2, subunit I		no						no	3 : Putative function from multiple computational evidences	2020-07-15	-3	2511206	2512642	1437
150	5	Pseudomonas sp. SWI36 SWI36_2	77219986	SEIQ01_1290025	CDS	automatic/finished		putative Cytochrome bd2, subunit I		no						no	3 : Putative function from multiple computational evidences	2020-07-15	2	2564246	2565682	1437
151	5	Bacillus albus PFYN01	93134510	SEIR01_4670073	CDS	automatic/finished		cytochrome bd ubiquinol oxidase subunit II	7.1.1.7	no						no		2022-01-17	-2	6305488	6306516	1029
151	5	Bacillus albus PFYN01	93134709	SEIR01_4760005	CDS	automatic/finished	cydB	cytochrome bb' ubiquinol oxidase (subunit II)	1.10.3.-	no	e : enzyme			16.10 : Respire ;	9852001, 10551842, 15231791, 15849754, 16850406	no	2a : Function from experimental evidences in other organisms	2022-01-17	-3	6475887	6476903	1017
151	5	Bacillus thuringiensis C15	93116429	SEIU01_10258	CDS	automatic/finished	cydB	cytochrome bb' ubiquinol oxidase (subunit II)	1.10.3.-	no	e : enzyme			16.10 : Respire ;	9852001, 10551842, 15231791, 15849754, 16850406	no	2a : Function from experimental evidences in other organisms	2022-01-17	1	246325	247341	1017
151	5	Bacillus thuringiensis C15	93117243	SEIU01_470029	CDS	automatic/finished		cytochrome bd ubiquinol oxidase subunit II	7.1.1.7	no						no		2022-01-17	3	1044675	1045703	1029
151	5	Pseudomonas sp. B10	93122049	SEIT01_20032	CDS	automatic/finished		cytochrome bd ubiquinol oxidase subunit II	7.1.1.7	no						no		2022-01-17	3	384672	385679	1008
151	5	Pseudomonas sp. B10	93123091	SEIT01_300024	CDS	automatic/finished		cytochrome bd ubiquinol oxidase subunit II	7.1.1.7	no						no		2022-01-17	3	1514811	1515827	1017
151	5	Pseudomonas sp. SWI36 SWI36_1	77225597	SEIS01_1340032	CDS	automatic/finished		putative Cytochrome bd2, subunit II		no						no	3 : Putative function from multiple computational evidences	2020-07-15	-3	2510195	2511202	1008
151	5	Pseudomonas sp. SWI36 SWI36_1	77226822	SEIS01_1550027	CDS	automatic/finished		putative Ubiquinol oxidase (electrogenic, proton-motive force generating)	7.1.1.7	no	e : enzyme					no	3 : Putative function from multiple computational evidences	2020-07-15	3	3769149	3769418	270
151	5	Pseudomonas sp. SWI36 SWI36_2	77219987	SEIQ01_1290026	CDS	automatic/finished		putative Cytochrome bd2, subunit II		no						no	3 : Putative function from multiple computational evidences	2020-07-15	2	2565686	2566693	1008
151	5	Pseudomonas sp. SWI36 SWI36_2	77220098	SEIQ01_1310027	CDS	automatic/finished		putative Ubiquinol oxidase (electrogenic, proton-motive force generating)	7.1.1.7	no	e : enzyme					no	3 : Putative function from multiple computational evidences	2020-07-15	-3	2683553	2683822	270
152	5	Bacillus albus PFYN01	93133536	SEIR01_4370011	CDS	automatic/finished	rpmA	ribosomal protein L27 (BL24)		no	f : factor			16.2 : Construct biomass (Anabolism) ;	9000630, 9588797, 11399077, 12682299, 14586115, 17981968, 22720735, 24335279, 25388641, 27435445	no	2a : Function from experimental evidences in other organisms	2022-01-17	3	5416338	5416628	291
152	5	Bacillus thuringiensis C15	93116675	SEIU01_130031	CDS	automatic/finished	rpmA	ribosomal protein L27 (BL24)		no	f : factor			16.2 : Construct biomass (Anabolism) ;	9000630, 9588797, 11399077, 12682299, 14586115, 17981968, 22720735, 24335279, 25388641, 27435445	no	2a : Function from experimental evidences in other organisms	2022-01-17	1	502888	503178	291
152	5	Pseudomonas sp. B10	93122082	SEIT01_20065	CDS	automatic/finished	rpmA	50S ribosomal subunit protein L27		no						no		2022-01-17	2	421622	421879	258
152	5	Pseudomonas sp. SWI36 SWI36_1	77223967	SEIS01_260004	CDS	automatic/finished	rpmA	50S ribosomal subunit protein L27		no						no		2020-07-15	-2	835620	835877	258
152	5	Pseudomonas sp. SWI36 SWI36_2	77221750	SEIQ01_1650016	CDS	automatic/finished	rpmA	50S ribosomal subunit protein L27		no						no		2020-07-15	3	4389009	4389266	258
1557	5	Bacillus albus PFYN01	93130430	SEIR01_1460002	CDS	automatic/finished	rbsC	ribose ABC transporter (permease)		no	t : transporter			16.1 : Circulate ;	7921236, 15849754, 16850406	no	2a : Function from experimental evidences in other organisms	2022-01-17	2	2570381	2571316	936
1557	5	Bacillus thuringiensis C15	93121457	SEIU01_1290013	CDS	automatic/finished	rbsC	ribose ABC transporter (permease)		no	t : transporter			16.1 : Circulate ;	7921236, 15849754, 16850406	no	2a : Function from experimental evidences in other organisms	2022-01-17	-1	5038012	5038947	936
1557	5	Pseudomonas sp. B10	93124519	SEIT01_440026	CDS	automatic/finished	rbsC	ribose ABC transporter membrane subunit		no						no		2022-01-17	-3	3037975	3038997	1023
1557	5	Pseudomonas sp. B10	93124549	SEIT01_440056	CDS	automatic/finished		ABC transporter permease		no						no		2022-01-17	-2	3067982	3068959	978
1557	5	Pseudomonas sp. B10	93124997	SEIT01_510053	CDS	automatic/finished	araH	arabinose ABC transporter membrane subunit	7.5.2.12	no						no		2022-01-17	3	3543915	3544886	972
1557	5	Pseudomonas sp. B10	93126808	SEIT01_870129	CDS	automatic/finished	xylH	xylose ABC transporter membrane subunit	7.5.2.10	no						no		2022-01-17	1	5483290	5484426	1137
1557	5	Pseudomonas sp. SWI36 SWI36_1	77226459	SEIS01_1490009	CDS	automatic/finished		Ribose ABC transport system, permease protein RbsC (TC 3.A.1.2.1)		no						no		2020-07-15	3	3389886	3390881	996
1557	5	Pseudomonas sp. SWI36 SWI36_2	77217699	SEIQ01_10124	CDS	automatic/finished		Ribose ABC transport system, permease protein RbsC (TC 3.A.1.2.1)		no						no		2020-07-15	2	131366	132361	996
1558	5	Bacillus albus PFYN01	93128914	SEIR01_520004	CDS	automatic/finished		acetyl esterase	3.1.1.-	no						no		2022-01-17	-1	1198706	1199662	957
1558	5	Bacillus thuringiensis C15	93121363	SEIU01_1220003	CDS	automatic/finished		acetyl esterase	3.1.1.-	no						no		2022-01-17	2	4943516	4944472	957
1558	5	Pseudomonas sp. B10	93122935	SEIT01_280064	CDS	automatic/finished		acetyl esterase	3.1.1.-	no						no		2022-01-17	1	1318801	1319757	957
1558	5	Pseudomonas sp. B10	93124496	SEIT01_440003	CDS	automatic/finished		acetyl esterase	3.1.1.-	no						no		2022-01-17	3	3012864	3013880	1017
1558	5	Pseudomonas sp. B10	93126387	SEIT01_760118	CDS	automatic/finished		acetyl esterase	3.1.1.-	no						no		2022-01-17	-1	5050389	5051402	1014
1558	5	Pseudomonas sp. SWI36 SWI36_1	77223818	SEIS01_200010	CDS	automatic/finished		Alpha/beta hydrolase		no						no		2020-07-15	-3	688808	689827	1020
1558	5	Pseudomonas sp. SWI36 SWI36_1	77224673	SEIS01_770002	CDS	automatic/finished		Alpha/beta hydrolase		no						no		2020-07-15	2	1613777	1614730	954
1558	5	Pseudomonas sp. SWI36 SWI36_2	77218037	SEIQ01_100002	CDS	automatic/finished		Alpha/beta hydrolase		no						no		2020-07-15	1	480679	481632	954
1558	5	Pseudomonas sp. SWI36 SWI36_2	77218285	SEIQ01_220007	CDS	automatic/finished		Alpha/beta hydrolase		no						no		2020-07-15	2	753353	754372	1020
157	5	Bacillus albus PFYN01	93134647	SEIR01_4720018	CDS	automatic/finished	gcvPB	glycine decarboxylase (subunit 2) (glycine cleavage system protein P)	1.4.4.2	no	e : enzyme			16.11 : Scavenge (Catabolism) ;	8181752, 20011599, 22720735, 23721735, 29089431	no	2a : Function from experimental evidences in other organisms	2022-01-17	-3	6410982	6412457	1476
157	5	Bacillus albus PFYN01	93134648	SEIR01_4720019	CDS	automatic/finished	gcvPA	glycine decarboxylase (subunit 1) (glycine cleavage system protein P)	1.4.4.2	no	e : enzyme			16.11 : Scavenge (Catabolism) ;	8181752, 20011599, 23721735, 29089431	no	2a : Function from experimental evidences in other organisms	2022-01-17	-1	6412454	6413797	1344
157	5	Bacillus thuringiensis C15	93120329	SEIU01_960030	CDS	automatic/finished	gcvPA	glycine decarboxylase (subunit 1) (glycine cleavage system protein P)	1.4.4.2	no	e : enzyme			16.11 : Scavenge (Catabolism) ;	8181752, 20011599, 23721735, 29089431	no	2a : Function from experimental evidences in other organisms	2022-01-17	2	4021559	4022902	1344
157	5	Bacillus thuringiensis C15	93120330	SEIU01_960031	CDS	automatic/finished	gcvPB	glycine decarboxylase (subunit 2) (glycine cleavage system protein P)	1.4.4.2	no	e : enzyme			16.11 : Scavenge (Catabolism) ;	8181752, 20011599, 22720735, 23721735, 29089431	no	2a : Function from experimental evidences in other organisms	2022-01-17	1	4022899	4024374	1476
157	5	Pseudomonas sp. B10	93122607	SEIT01_260005	CDS	automatic/finished	gcvP	glycine decarboxylase	1.4.4.2	no						no		2022-01-17	-1	970374	973247	2874
157	5	Pseudomonas sp. B10	93122999	SEIT01_290029	CDS	automatic/finished	gcvP	glycine decarboxylase	1.4.4.2	no						no		2022-01-17	2	1397570	1400422	2853
157	5	Pseudomonas sp. SWI36 SWI36_1	77225926	SEIS01_1380127	CDS	automatic/finished	gcvP	glycine decarboxylase	1.4.4.2	no						no		2020-07-15	1	2847373	2850246	2874
157	5	Pseudomonas sp. SWI36 SWI36_1	77227477	SEIS01_1720003	CDS	automatic/finished	gcvP	glycine decarboxylase	1.4.4.2	no						no		2020-07-15	-1	4528525	4531380	2856
157	5	Pseudomonas sp. SWI36 SWI36_2	77217830	SEIQ01_20010	CDS	automatic/finished	gcvP	glycine decarboxylase	1.4.4.2	no						no		2020-07-15	-2	265821	268694	2874
157	5	Pseudomonas sp. SWI36 SWI36_2	77221923	SEIQ01_1690003	CDS	automatic/finished	gcvP	glycine decarboxylase	1.4.4.2	no						no		2020-07-15	-1	4584547	4587402	2856
1579	5	Bacillus albus PFYN01	93128092	SEIR01_130076	CDS	automatic/finished	dapF	diaminopimelate epimerase	5.1.1.7	no	e : enzyme			16.2 : Construct biomass (Anabolism) ;	14627808, 16723397, 19307721, 28873470	no	2a : Function from experimental evidences in other organisms	2022-01-17	1	470206	471072	867
1579	5	Bacillus thuringiensis C15	93117032	SEIU01_350069	CDS	automatic/finished	dapF	diaminopimelate epimerase	5.1.1.7	no	e : enzyme			16.2 : Construct biomass (Anabolism) ;	14627808, 16723397, 19307721, 28873470	no	2a : Function from experimental evidences in other organisms	2022-01-17	3	852618	853484	867
1579	5	Pseudomonas sp. B10	93122677	SEIT01_260075	CDS	automatic/finished	dapF	diaminopimelate epimerase	5.1.1.7	no						no		2022-01-17	2	1037060	1037890	831
1579	5	Pseudomonas sp. SWI36 SWI36_1	77225890	SEIS01_1380091	CDS	automatic/finished	dapF	diaminopimelate epimerase	5.1.1.7	no						no		2020-07-15	-3	2808845	2809675	831
1579	5	Pseudomonas sp. SWI36 SWI36_2	77217866	SEIQ01_20046	CDS	automatic/finished	dapF	diaminopimelate epimerase	5.1.1.7	no						no		2020-07-15	2	306392	307222	831
159	5	Bacillus albus PFYN01	93133691	SEIR01_4430013	CDS	automatic/finished	alaS	alanyl-tRNA synthetase	6.1.1.7	no	e : enzyme			16.2 : Construct biomass (Anabolism) ;	12554667, 12682299, 17329819, 22720735, 25918376	no	2a : Function from experimental evidences in other organisms	2022-01-17	3	5571885	5574527	2643
159	5	Bacillus thuringiensis C15	93116727	SEIU01_130083	CDS	automatic/finished	alaS	alanyl-tRNA synthetase	6.1.1.7	no	e : enzyme			16.2 : Construct biomass (Anabolism) ;	12554667, 12682299, 17329819, 22720735, 25918376	no	2a : Function from experimental evidences in other organisms	2022-01-17	2	557927	560569	2643
159	5	Pseudomonas sp. B10	93126112	SEIT01_700003	CDS	automatic/finished	alaS	alanine--tRNA ligase/DNA-binding transcriptional repressor	6.1.1.7	no						no		2022-01-17	-3	4719949	4722573	2625
159	5	Pseudomonas sp. SWI36 SWI36_1	77224061	SEIS01_330003	CDS	automatic/finished	alaS	alanine--tRNA ligase/DNA-binding transcriptional repressor	6.1.1.7	no						no		2020-07-15	-1	931741	934434	2694
159	5	Pseudomonas sp. SWI36 SWI36_2	77221710	SEIQ01_1640008	CDS	automatic/finished	alaS	alanine--tRNA ligase/DNA-binding transcriptional repressor	6.1.1.7	no						no		2020-07-15	3	4352349	4355042	2694
16	5	Bacillus albus PFYN01	93131727	SEIR01_2570012	CDS	automatic/finished	msrA	peptide methionine S-sulfoxide reductase	1.8.4.11	no	e : enzyme			16.6 : Maintain ;	9573155, 16803968, 17062561, 18662407	no	2a : Function from experimental evidences in other organisms	2022-01-17	-1	3744299	3744835	537
16	5	Bacillus albus PFYN01	93133231	SEIR01_4300009	CDS	automatic/finished	msrAB	Peptide methionine sulfoxide reductase MsrA / Peptide methionine sulfoxide reductase MsrB	1.8.4.11, 1.8.4.12	no						no		2022-01-17	-1	5155427	5156392	966
16	5	Bacillus thuringiensis C15	93116329	SEIU01_10158	CDS	automatic/finished	msrA	peptide methionine S-sulfoxide reductase	1.8.4.11	no	e : enzyme			16.6 : Maintain ;	9573155, 16803968, 17062561, 18662407	no	2a : Function from experimental evidences in other organisms	2022-01-17	-1	143590	144126	537
16	5	Bacillus thuringiensis C15	93116573	SEIU01_20140	CDS	automatic/finished	msrAB	Peptide methionine sulfoxide reductase MsrA / Peptide methionine sulfoxide reductase MsrB	1.8.4.11, 1.8.4.12	no						no		2022-01-17	-1	399751	400716	966
16	5	Pseudomonas sp. B10	93123387	SEIT01_320118	CDS	automatic/finished	msrA	methionine sulfoxide reductase A	1.8.4.11, 1.8.4.13	no						no		2022-01-17	-1	1834371	1835036	666
16	5	Pseudomonas sp. B10	93126406	SEIT01_760137	CDS	automatic/finished	msrB	methionine sulfoxide reductase B	1.8.4.12, 1.8.4.14	no						no		2022-01-17	2	5066393	5066788	396
16	5	Pseudomonas sp. B10	93126816	SEIT01_870137	CDS	automatic/finished	msrA	Peptide methionine sulfoxide reductase MsrA	1.8.4.11	no						no		2022-01-17	2	5492624	5493130	507
16	5	Pseudomonas sp. SWI36 SWI36_1	77224525	SEIS01_630002	CDS	automatic/finished	msrB	methionine sulfoxide reductase B	1.8.4.12, 1.8.4.14	no						no		2020-07-15	1	1443016	1443411	396
16	5	Pseudomonas sp. SWI36 SWI36_1	77228182	SEIS01_1930064	CDS	automatic/finished	msrA	methionine sulfoxide reductase A	1.8.4.11, 1.8.4.13	no						no		2020-07-15	-2	5275524	5276192	669
16	5	Pseudomonas sp. SWI36 SWI36_2	77218143	SEIQ01_130064	CDS	automatic/finished	msrA	methionine sulfoxide reductase A	1.8.4.11, 1.8.4.13	no						no		2020-07-15	-3	594110	594778	669
16	5	Pseudomonas sp. SWI36 SWI36_2	77218986	SEIQ01_630006	CDS	automatic/finished	msrB	methionine sulfoxide reductase B	1.8.4.12, 1.8.4.14	no						no		2020-07-15	-1	1502911	1503306	396
1667	5	Bacillus albus PFYN01	93130611	SEIR01_1570058	CDS	automatic/finished	efp	elongation factor P		no	f : factor			16.2 : Construct biomass (Anabolism) ; 16.6 : Maintain ;	1956781, 14586115, 15066026, 15210970, 16014871, 27002156, 28787546, 29615499	no	2a : Function from experimental evidences in other organisms	2022-01-17	-2	2741638	2742195	558
1667	5	Bacillus thuringiensis C15	93120359	SEIU01_960060	CDS	automatic/finished	efp	elongation factor P		no	f : factor			16.2 : Construct biomass (Anabolism) ; 16.6 : Maintain ;	1956781, 14586115, 15066026, 15210970, 16014871, 27002156, 28787546, 29615499	no	2a : Function from experimental evidences in other organisms	2022-01-17	1	4042207	4042764	558
1667	5	Pseudomonas sp. B10	93126386	SEIT01_760117	CDS	automatic/finished	efp	Elongation factor P		no						no		2022-01-17	1	5049754	5050323	570
1667	5	Pseudomonas sp. SWI36 SWI36_1	77224184	SEIS01_390009	CDS	automatic/finished	efp	Elongation factor P		no						no		2020-07-15	1	1078234	1078803	570
1667	5	Pseudomonas sp. SWI36 SWI36_2	77218580	SEIQ01_370009	CDS	automatic/finished	efp	Elongation factor P		no						no		2020-07-15	2	1107824	1108393	570
1725	5	Bacillus albus PFYN01	93133264	SEIR01_4310021	CDS	automatic/finished	yrpB	putative anionic nitroalkane monoxygenase	1.13.12.-	no	e : enzyme			16.8 : Protect ; 16.11 : Scavenge (Catabolism) ;	9501443	no	3 : Putative function from multiple computational evidences	2022-01-17	-1	5184299	5185387	1089
1725	5	Bacillus thuringiensis C15	93117193	SEIU01_460097	CDS	automatic/finished	yrpB	putative anionic nitroalkane monoxygenase	1.13.12.-	no	e : enzyme			16.8 : Protect ; 16.11 : Scavenge (Catabolism) ;	9501443	no	3 : Putative function from multiple computational evidences	2022-01-17	2	1007039	1008130	1092
1725	5	Pseudomonas sp. B10	93123498	SEIT01_330031	CDS	automatic/finished	pnoA	Nitronate monooxygenase	1.13.12.-	no						no		2022-01-17	1	1960117	1961178	1062
1725	5	Pseudomonas sp. SWI36 SWI36_1	77228502	SEIS01_2050009	CDS	automatic/finished	pnoA	Nitronate monooxygenase	1.13.12.-	no						no		2020-07-15	1	5623849	5624934	1086
1725	5	Pseudomonas sp. SWI36 SWI36_2	77222948	SEIQ01_2010020	CDS	automatic/finished	pnoA	Nitronate monooxygenase	1.13.12.-	no						no		2020-07-15	-1	5652973	5654058	1086
1731	5	Bacillus albus PFYN01	93132955	SEIR01_4230028	CDS	automatic/finished	rnc	ribonuclease III	3.1.26.3	no	e : enzyme				11123676, 12682299, 16179796, 22412379, 23300471, 26883633	no	2a : Function from experimental evidences in other organisms	2022-01-17	3	4878507	4879244	738
1731	5	Bacillus thuringiensis C15	93119494	SEIU01_740173	CDS	automatic/finished	rnc	ribonuclease III	3.1.26.3	no	e : enzyme				11123676, 12682299, 16179796, 22412379, 23300471, 26883633	no	2a : Function from experimental evidences in other organisms	2022-01-17	1	3167686	3168423	738
1731	5	Pseudomonas sp. B10	93122596	SEIT01_250117	CDS	automatic/finished	rnc	RNase III	3.1.26.3	no						no		2022-01-17	1	957604	958230	627
1731	5	Pseudomonas sp. SWI36 SWI36_1	77227652	SEIS01_1770022	CDS	automatic/finished	rnc	RNase III	3.1.26.3	no						no		2020-07-15	1	4708648	4709337	690
1731	5	Pseudomonas sp. SWI36 SWI36_2	77222018	SEIQ01_1720008	CDS	automatic/finished	rnc	RNase III	3.1.26.3	no						no		2020-07-15	-3	4685159	4685848	690
1763	5	Bacillus albus PFYN01	93127569	SEIR01_10008	CDS	automatic/finished		Exopolysaccharide biosynthesis polyprenyl glycosylphosphotransferase		no						no		2022-01-17	-1	8015	8674	660
1763	5	Bacillus albus PFYN01	93132512	SEIR01_3460027	CDS	automatic/finished		Sugar transferase		no						no		2022-01-17	-2	4454737	4455375	639
1763	5	Bacillus thuringiensis C15	93118859	SEIU01_640006	CDS	automatic/finished		Bac_transf domain-containing protein		no						no		2022-01-17	1	2567524	2568162	639
1763	5	Bacillus thuringiensis C15	93119609	SEIU01_760010	CDS	automatic/finished		Multidrug MFS transporter		no						no		2022-01-17	-3	3276263	3276943	681
1763	5	Pseudomonas sp. B10	93122392	SEIT01_240043	CDS	automatic/finished		putative colanic acid biosysnthesis UDP-glucose lipid carrier transferase		no						no	3 : Putative function from multiple computational evidences	2022-01-17	1	738673	740064	1392
1763	5	Pseudomonas sp. B10	93123263	SEIT01_310088	CDS	automatic/finished		putative colanic acid biosysnthesis UDP-glucose lipid carrier transferase		no						no	3 : Putative function from multiple computational evidences	2022-01-17	-1	1691988	1693382	1395
1763	5	Pseudomonas sp. B10	93125693	SEIT01_630012	CDS	automatic/finished		Sugar transferase		no						no		2022-01-17	3	4285344	4286090	747
1763	5	Pseudomonas sp. SWI36 SWI36_1	77223177	SEIS01_10034	CDS	automatic/finished		Undecaprenyl-phosphate galactose phosphotransferase	2.7.8.6	no						no		2020-07-15	2	35054	36475	1422
1763	5	Pseudomonas sp. SWI36 SWI36_2	77220808	SEIQ01_1440022	CDS	automatic/finished		Undecaprenyl-phosphate galactose phosphotransferase	2.7.8.6	no						no		2020-07-15	-3	3416516	3417937	1422
177	5	Bacillus albus PFYN01	93134104	SEIR01_4560018	CDS	automatic/finished	kdpA	K(+) transporting P-type ATPase subunit KdpA	7.2.2.6	no						no		2022-01-17	3	5947203	5948870	1668
177	5	Bacillus thuringiensis C15	93117702	SEIU01_520018	CDS	automatic/finished	kdpA	K(+) transporting P-type ATPase subunit KdpA	7.2.2.6	no						no		2022-01-17	2	1483562	1485229	1668
177	5	Pseudomonas sp. B10	93126351	SEIT01_760082	CDS	automatic/finished	kdpA	K(+) transporting P-type ATPase subunit KdpA	7.2.2.6	no						no		2022-01-17	3	5017923	5019617	1695
177	5	Pseudomonas sp. SWI36 SWI36_1	77225385	SEIS01_1300056	CDS	automatic/finished	kdpA	K(+) transporting P-type ATPase subunit KdpA	7.2.2.-	no						no		2020-07-15	-3	2296376	2298070	1695
177	5	Pseudomonas sp. SWI36 SWI36_2	77219805	SEIQ01_1260002	CDS	automatic/finished	kdpA	K(+) transporting P-type ATPase subunit KdpA	7.2.2.-	no						no		2020-07-15	1	2347159	2348853	1695
1772	5	Bacillus albus PFYN01	93133552	SEIR01_4370027	CDS	automatic/finished	nadA	quinolinate synthetase	2.5.1.72	no	e : enzyme			16.10 : Respire ;	15898769, 15937336, 15967443, 18959769, 26455817	no	2a : Function from experimental evidences in other organisms	2022-01-17	1	5431897	5433003	1107
1772	5	Bacillus thuringiensis C15	93116689	SEIU01_130045	CDS	automatic/finished	nadA	quinolinate synthetase	2.5.1.72	no	e : enzyme			16.10 : Respire ;	15898769, 15937336, 15967443, 18959769, 26455817	no	2a : Function from experimental evidences in other organisms	2022-01-17	1	517882	518988	1107
1772	5	Pseudomonas sp. B10	93123004	SEIT01_290034	CDS	automatic/finished	nadA	quinolinate synthase	2.5.1.72	no						no		2022-01-17	-1	1404354	1405412	1059
1772	5	Pseudomonas sp. SWI36 SWI36_1	77224948	SEIS01_1010058	CDS	automatic/finished	nadA	quinolinate synthase	2.5.1.72	no						no		2020-07-15	-2	1873389	1874447	1059
1772	5	Pseudomonas sp. SWI36 SWI36_2	77218782	SEIQ01_500004	CDS	automatic/finished	nadA	quinolinate synthase	2.5.1.72	no						no		2020-07-15	-1	1317106	1318164	1059
18	5	Bacillus albus PFYN01	93133201	SEIR01_4290003	CDS	automatic/finished	yfnC	putative efflux transporter		no	t : transporter			16.1 : Circulate ; 16.8 : Protect ;	15849754, 16850406	no	3 : Putative function from multiple computational evidences	2022-01-17	-2	5114182	5115393	1212
18	5	Bacillus thuringiensis C15	93116317	SEIU01_10146	CDS	automatic/finished	yfnC	putative efflux transporter		no	t : transporter			16.1 : Circulate ; 16.8 : Protect ;	15849754, 16850406	no	3 : Putative function from multiple computational evidences	2022-01-17	1	132685	133896	1212
18	5	Pseudomonas sp. B10	93122842	SEIT01_270099	CDS	automatic/finished	fsr	fosmidomycin efflux pump		no						no		2022-01-17	-3	1197904	1199121	1218
18	5	Pseudomonas sp. SWI36 SWI36_1	77223466	SEIS01_20071	CDS	automatic/finished	fsr	fosmidomycin efflux pump		no						no		2020-07-15	-2	320226	321458	1233
18	5	Pseudomonas sp. SWI36 SWI36_1	77228566	SEIS01_2080010	CDS	automatic/finished	fsr	fosmidomycin efflux pump		no						no		2020-07-15	3	5690547	5691761	1215
18	5	Pseudomonas sp. SWI36 SWI36_2	77217603	SEIQ01_10028	CDS	automatic/finished	fsr	fosmidomycin efflux pump		no						no		2020-07-15	-2	29967	31199	1233
18	5	Pseudomonas sp. SWI36 SWI36_2	77221764	SEIQ01_1650030	CDS	automatic/finished	fsr	fosmidomycin efflux pump		no						no		2020-07-15	2	4402616	4403830	1215
186	5	Bacillus albus PFYN01	93133214	SEIR01_4290016	CDS	automatic/finished	lysCA	aspartokinase II alpha subunit (aa 1->408)	2.7.2.4	no	e : enzyme			16.2 : Construct biomass (Anabolism) ;	1980002, 2837491, 2981221, 2981222, 8757727, 9851048, 14597663	no	2a : Function from experimental evidences in other organisms	2022-01-17	1	5130067	5131296	1230
186	5	Bacillus thuringiensis C15	93116302	SEIU01_10131	CDS	automatic/finished	lysCA	aspartokinase II alpha subunit (aa 1->408)	2.7.2.4	no	e : enzyme			16.2 : Construct biomass (Anabolism) ;	1980002, 2837491, 2981221, 2981222, 8757727, 9851048, 14597663	no	2a : Function from experimental evidences in other organisms	2022-01-17	-2	115344	116573	1230
186	5	Pseudomonas sp. B10	93126111	SEIT01_700002	CDS	automatic/finished		Aspartate kinase	2.7.2.4	no						no		2022-01-17	-3	4718617	4719858	1242
186	5	Pseudomonas sp. SWI36 SWI36_1	77224060	SEIS01_330002	CDS	automatic/finished		Aspartate kinase	2.7.2.4	no						no		2020-07-15	-1	930403	931638	1236
186	5	Pseudomonas sp. SWI36 SWI36_2	77221711	SEIQ01_1640009	CDS	automatic/finished		Aspartate kinase	2.7.2.4	no						no		2020-07-15	3	4355145	4356380	1236
187	5	Bacillus albus PFYN01	93131732	SEIR01_2570017	CDS	automatic/finished	ilvC	acetohydroxy-acid isomeroreductase (NADP-dependent)	1.1.1.86	no	e : enzyme			16.2 : Construct biomass (Anabolism) ;	15228537, 15916605, 25393291, 25849365	no	2a : Function from experimental evidences in other organisms	2022-01-17	2	3749498	3750505	1008
187	5	Bacillus albus PFYN01	93133830	SEIR01_4450097	CDS	automatic/finished	ilvC	acetohydroxy-acid isomeroreductase (NADP-dependent)	1.1.1.86	no	e : enzyme			16.2 : Construct biomass (Anabolism) ;	15228537, 15916605, 25393291, 25849365	no	2a : Function from experimental evidences in other organisms	2022-01-17	-1	5699831	5700841	1011
187	5	Bacillus thuringiensis C15	93116335	SEIU01_10164	CDS	automatic/finished	ilvC	acetohydroxy-acid isomeroreductase (NADP-dependent)	1.1.1.86	no	e : enzyme			16.2 : Construct biomass (Anabolism) ;	15228537, 15916605, 25393291, 25849365	no	2a : Function from experimental evidences in other organisms	2022-01-17	3	148791	149798	1008
187	5	Bacillus thuringiensis C15	93121123	SEIU01_1180009	CDS	automatic/finished	ilvC	acetohydroxy-acid isomeroreductase (NADP-dependent)	1.1.1.86	no	e : enzyme			16.2 : Construct biomass (Anabolism) ;	15228537, 15916605, 25393291, 25849365	no	2a : Function from experimental evidences in other organisms	2022-01-17	3	4734357	4735367	1011
187	5	Pseudomonas sp. B10	93122158	SEIT01_20141	CDS	automatic/finished	ilvC	Ketol-acid reductoisomerase (NADP(+))	1.1.1.86	no						no		2022-01-17	1	498745	499761	1017
187	5	Pseudomonas sp. SWI36 SWI36_1	77224144	SEIS01_350067	CDS	automatic/finished	ilvC	Ketol-acid reductoisomerase (NADP(+))	1.1.1.86	no						no		2020-07-15	3	1029609	1030625	1017
187	5	Pseudomonas sp. SWI36 SWI36_2	77219194	SEIQ01_790067	CDS	automatic/finished	ilvC	Ketol-acid reductoisomerase (NADP(+))	1.1.1.86	no						no		2020-07-15	1	1745110	1746126	1017
19177	5	Bacillus albus PFYN01	93131801	SEIR01_2680005	CDS	automatic/finished	gntP	gluconate/proton permease		no	t : transporter			16.1 : Circulate ;	3020045, 15849754, 1659648, 16850406	no	2a : Function from experimental evidences in other organisms	2022-01-17	1	3824290	3825615	1326
19177	5	Bacillus albus PFYN01	93132875	SEIR01_4210019	CDS	automatic/finished	gntP	gluconate/proton permease		no	t : transporter			16.1 : Circulate ;	3020045, 15849754, 1659648, 16850406	no	2a : Function from experimental evidences in other organisms	2022-01-17	-2	4804585	4805934	1350
19177	5	Bacillus albus PFYN01	93134466	SEIR01_4670029	CDS	automatic/finished	gnuT	Gluconate permease		no						no		2022-01-17	1	6264697	6266022	1326
19177	5	Bacillus thuringiensis C15	93117292	SEIU01_470078	CDS	automatic/finished	gnuT	Gluconate permease		no						no		2022-01-17	-2	1084683	1086008	1326
19177	5	Bacillus thuringiensis C15	93117369	SEIU01_480043	CDS	automatic/finished	gntP	gluconate/proton permease		no	t : transporter			16.1 : Circulate ;	3020045, 15849754, 1659648, 16850406	no	2a : Function from experimental evidences in other organisms	2022-01-17	-3	1165691	1167016	1326
19177	5	Bacillus thuringiensis C15	93117566	SEIU01_500046	CDS	automatic/finished	gntP	gluconate/proton permease		no	t : transporter			16.1 : Circulate ;	3020045, 15849754, 1659648, 16850406	no	2a : Function from experimental evidences in other organisms	2022-01-17	3	1352397	1353746	1350
19177	5	Pseudomonas sp. B10	93124458	SEIT01_430177	CDS	automatic/finished	gntP	Gluconate permease		no						no		2022-01-17	-1	2969382	2970731	1350
19177	5	Pseudomonas sp. B10	93126658	SEIT01_850021	CDS	automatic/finished	gnuT	Gluconate permease		no						no		2022-01-17	-2	5333144	5334496	1353
19177	5	Pseudomonas sp. SWI36 SWI36_1	77228216	SEIS01_1950004	CDS	automatic/finished	gnuT	Gluconate permease		no						no		2020-07-15	-2	5330007	5331359	1353
19177	5	Pseudomonas sp. SWI36 SWI36_2	77222225	SEIQ01_1770068	CDS	automatic/finished	gnuT	Gluconate permease		no						no		2020-07-15	-2	4911765	4913117	1353
1921	5	Bacillus albus PFYN01	93133808	SEIR01_4450075	CDS	automatic/finished	cysH	(phospho)adenosine phosphosulfate reductase	1.8.4.8	no	e : enzyme			16.2 : Construct biomass (Anabolism) ;	10094622, 11004190, 12072441, 16267287, 18456801	no	2a : Function from experimental evidences in other organisms	2022-01-17	-2	5679598	5680302	705
1921	5	Bacillus thuringiensis C15	93121145	SEIU01_1180031	CDS	automatic/finished	cysH	(phospho)adenosine phosphosulfate reductase	1.8.4.8	no	e : enzyme			16.2 : Construct biomass (Anabolism) ;	10094622, 11004190, 12072441, 16267287, 18456801	no	2a : Function from experimental evidences in other organisms	2022-01-17	1	4754896	4755600	705
1921	5	Pseudomonas sp. B10	93127446	SEIT01_1130003	CDS	automatic/finished	cysH	Adenosine 5'-phosphosulfate reductase	1.8.4.10	no						no		2022-01-17	3	6165735	6166469	735
1921	5	Pseudomonas sp. SWI36 SWI36_1	77223429	SEIS01_20034	CDS	automatic/finished	cysH	Phosphoadenosine phosphosulfate reductase	1.8.4.8	no						no		2020-07-15	-3	277517	278251	735
1921	5	Pseudomonas sp. SWI36 SWI36_2	77221176	SEIQ01_1510034	CDS	automatic/finished	cysH	Phosphoadenosine phosphosulfate reductase	1.8.4.8	no						no		2020-07-15	-1	3803884	3804618	735
1969	5	Bacillus albus PFYN01	93130468	SEIR01_1460040	CDS	automatic/finished	qoxA	cytochrome aa3-600 quinol oxidase (subunit II)	7.1.1.5	no	e : enzyme			16.10 : Respire ;	1316894, 7495838, 7575098, 10551842, 22720735, 26196462, 34097790	no	2a : Function from experimental evidences in other organisms	2022-01-17	-1	2608370	2609245	876
1969	5	Bacillus thuringiensis C15	93119069	SEIU01_680017	CDS	automatic/finished	qoxA	cytochrome aa3-600 quinol oxidase (subunit II)	7.1.1.5	no	e : enzyme			16.10 : Respire ;	1316894, 7495838, 7575098, 10551842, 22720735, 26196462, 34097790	no	2a : Function from experimental evidences in other organisms	2022-01-17	2	2779400	2780275	876
1969	5	Pseudomonas sp. B10	93124837	SEIT01_490011	CDS	automatic/finished	cyoA	cytochrome bo3 ubiquinol oxidase subunit 2	7.1.1.3	no						no		2022-01-17	3	3374397	3375338	942
1969	5	Pseudomonas sp. SWI36 SWI36_1	77226256	SEIS01_1450003	CDS	automatic/finished	cyoA	cytochrome bo3 ubiquinol oxidase subunit 2	7.1.1.-	no						no		2020-07-15	2	3184556	3185497	942
1969	5	Pseudomonas sp. SWI36 SWI36_2	77220554	SEIQ01_1390002	CDS	automatic/finished	cyoA	cytochrome bo3 ubiquinol oxidase subunit 2	7.1.1.-	no						no		2020-07-15	2	3156284	3157225	942
199	5	Bacillus albus PFYN01	93131651	SEIR01_2460035	CDS	automatic/finished	moaB	molybdopterin GTP-binding precursor Z biosynthesis component		no	f : factor			16.2 : Construct biomass (Anabolism) ;	15269205, 20054111, 23680484	no	2a : Function from experimental evidences in other organisms	2022-01-17	-1	3682226	3682735	510
199	5	Bacillus thuringiensis C15	93119703	SEIU01_790022	CDS	automatic/finished	moaB	molybdopterin GTP-binding precursor Z biosynthesis component		no	f : factor			16.2 : Construct biomass (Anabolism) ;	15269205, 20054111, 23680484	no	2a : Function from experimental evidences in other organisms	2022-01-17	-3	3388475	3388984	510
199	5	Pseudomonas sp. B10	93125535	SEIT01_600014	CDS	automatic/finished	moaB	protein MoaB		no						no		2022-01-17	-2	4144721	4145260	540
199	5	Pseudomonas sp. B10	93126427	SEIT01_760158	CDS	automatic/finished	moaB	protein MoaB		no						no		2022-01-17	1	5089153	5089692	540
199	5	Pseudomonas sp. SWI36 SWI36_1	77227574	SEIS01_1750007	CDS	automatic/finished	moaB	MoaB protein		no						no		2020-07-15	1	4628302	4628841	540
199	5	Pseudomonas sp. SWI36 SWI36_1	77227681	SEIS01_1780022	CDS	automatic/finished	moaB	MoaB protein		no						no		2020-07-15	-3	4736603	4737121	519
199	5	Pseudomonas sp. SWI36 SWI36_2	77220508	SEIQ01_1380010	CDS	automatic/finished	moaB	MoaB protein		no						no		2020-07-15	1	3113986	3114504	519
199	5	Pseudomonas sp. SWI36 SWI36_2	77221971	SEIQ01_1700023	CDS	automatic/finished	moaB	MoaB protein		no						no		2020-07-15	-1	4639072	4639611	540
206	5	Bacillus albus PFYN01	93128678	SEIR01_400007	CDS	automatic/finished	ldeF	methylglutaconyl-CoA hydratase (leucine degradation)	4.2.1.18	no	e : enzyme			16.11 : Scavenge (Catabolism) ;	19935659	no	2b : Function from indirect experimental evidences (e.g. phenotypes)	2022-01-17	-1	991448	992236	789
206	5	Bacillus albus PFYN01	93134032	SEIR01_4530020	CDS	automatic/finished	fadB	enoyl-CoA hydratase	4.2.1.17	no	e : enzyme			16.11 : Scavenge (Catabolism) ;	17189250, 21398533	no	2a : Function from experimental evidences in other organisms	2022-01-17	-1	5886422	5887198	777
206	5	Bacillus thuringiensis C15	93117618	SEIU01_510016	CDS	automatic/finished	ldeF	methylglutaconyl-CoA hydratase (leucine degradation)	4.2.1.18	no	e : enzyme			16.11 : Scavenge (Catabolism) ;	19935659	no	2b : Function from indirect experimental evidences (e.g. phenotypes)	2022-01-17	-1	1405327	1406106	780
206	5	Bacillus thuringiensis C15	93119582	SEIU01_750019	CDS	automatic/finished	ldeF	methylglutaconyl-CoA hydratase (leucine degradation)	4.2.1.18	no	e : enzyme			16.11 : Scavenge (Catabolism) ;	19935659	no	2b : Function from indirect experimental evidences (e.g. phenotypes)	2022-01-17	-2	3248166	3248954	789
206	5	Bacillus thuringiensis C15	93120778	SEIU01_1070040	CDS	automatic/finished	fadB	enoyl-CoA hydratase	4.2.1.17	no	e : enzyme			16.11 : Scavenge (Catabolism) ;	17189250, 21398533	no	2a : Function from experimental evidences in other organisms	2022-01-17	-1	4423198	4423974	777
206	5	Pseudomonas sp. B10	93122433	SEIT01_240084	CDS	automatic/finished	paaF	putative 2,3-dehydroadipyl-CoA hydratase		no						no	3 : Putative function from multiple computational evidences	2022-01-17	-1	784746	785519	774
206	5	Pseudomonas sp. B10	93124220	SEIT01_410076	CDS	automatic/finished		3-hydroxyacyl-CoA dehydrogenase		no						no		2022-01-17	-2	2700419	2701642	1224
206	5	Pseudomonas sp. B10	93127032	SEIT01_980019	CDS	automatic/finished	echA	putative enoyl-CoA hydratase echA8	4.2.1.17	no						no	3 : Putative function from multiple computational evidences	2022-01-17	3	5721123	5721887	765
206	5	Pseudomonas sp. SWI36 SWI36_1	77223319	SEIS01_10176	CDS	automatic/finished	paaF	putative 2,3-dehydroadipyl-CoA hydratase		no						no	3 : Putative function from multiple computational evidences	2020-07-15	-1	169960	170733	774
206	5	Pseudomonas sp. SWI36 SWI36_1	77223834	SEIS01_210010	CDS	automatic/finished	paaF	putative 2,3-dehydroadipyl-CoA hydratase		no						no	3 : Putative function from multiple computational evidences	2020-07-15	3	708090	708863	774
206	5	Pseudomonas sp. SWI36 SWI36_1	77227150	SEIS01_1630011	CDS	automatic/finished		Enoyl-CoA hydratase	1.1.1.35, 5.1.2.3, 4.2.1.17, 5.3.3.8	no						no		2020-07-15	-3	4147112	4148350	1239
206	5	Pseudomonas sp. SWI36 SWI36_2	77218304	SEIQ01_230010	CDS	automatic/finished	paaF	putative 2,3-dehydroadipyl-CoA hydratase		no						no	3 : Putative function from multiple computational evidences	2020-07-15	2	777899	778672	774
206	5	Pseudomonas sp. SWI36 SWI36_2	77220250	SEIQ01_1330076	CDS	automatic/finished	paaF	putative 2,3-dehydroadipyl-CoA hydratase		no						no	3 : Putative function from multiple computational evidences	2020-07-15	1	2845663	2846436	774
206	5	Pseudomonas sp. SWI36 SWI36_2	77221077	SEIQ01_1490011	CDS	automatic/finished		Enoyl-CoA hydratase	1.1.1.35, 5.1.2.3, 4.2.1.17, 5.3.3.8	no						no		2020-07-15	-3	3698987	3700225	1239
2105	5	Bacillus albus PFYN01	93130238	SEIR01_1290006	CDS	automatic/finished		putative Mg2+ transporter-C (MgtC) family protein		no						no	3 : Putative function from multiple computational evidences	2022-01-17	-1	2407241	2407636	396
2105	5	Bacillus albus PFYN01	93130558	SEIR01_1570005	CDS	automatic/finished		putative Mg2+ transporter-C (MgtC) family protein		no						no	3 : Putative function from multiple computational evidences	2022-01-17	3	2694627	2694782	156
2105	5	Bacillus thuringiensis C15	93118437	SEIU01_590048	CDS	automatic/finished		putative Mg2+ transporter-C (MgtC) family protein		no						no	3 : Putative function from multiple computational evidences	2022-01-17	1	2156185	2156862	678
2105	5	Bacillus thuringiensis C15	93120412	SEIU01_960113	CDS	automatic/finished		putative Mg2+ transporter-C (MgtC) family protein		no						no	3 : Putative function from multiple computational evidences	2022-01-17	-2	4089882	4090289	408
2105	5	Pseudomonas sp. B10	93122949	SEIT01_280078	CDS	automatic/finished	mgtC	Protein MgtC		no						no		2022-01-17	1	1339786	1340502	717
2105	5	Pseudomonas sp. B10	93127208	SEIT01_1020007	CDS	automatic/finished		Protein MgtC		no						no		2022-01-17	-3	5904562	5905098	537
2105	5	Pseudomonas sp. SWI36 SWI36_1	77223274	SEIS01_10131	CDS	automatic/finished	mgtC	Protein MgtC		no						no		2020-07-15	-2	131955	132668	714
2105	5	Pseudomonas sp. SWI36 SWI36_1	77226948	SEIS01_1580031	CDS	automatic/finished		Protein MgtC		no		Cell inner membrane; Multi-pass membrane protein				no		2020-07-15	-3	3896891	3897409	519
2105	5	Pseudomonas sp. SWI36 SWI36_2	77220295	SEIQ01_1330121	CDS	automatic/finished	mgtC	Protein MgtC		no						no		2020-07-15	2	2883728	2884441	714
2105	5	Pseudomonas sp. SWI36 SWI36_2	77221276	SEIQ01_1540007	CDS	automatic/finished		Protein MgtC		no		Cell inner membrane; Multi-pass membrane protein				no		2020-07-15	2	3905621	3906139	519
211	5	Bacillus albus PFYN01	93131899	SEIR01_2790019	CDS	automatic/finished	sufLB	general stress protein 18; deglycase		no	e : enzyme			16.6 : Maintain ; 16.8 : Protect ;	10220166, 12354229, 16181642, 16380269, 17257049, 17933887, 24330391, 25283443, 25561404, 28032445, 30377275	no	2a : Function from experimental evidences in other organisms	2022-01-17	-2	3913240	3913755	516
211	5	Bacillus thuringiensis C15	93117804	SEIU01_520120	CDS	automatic/finished	sufLB	general stress protein 18; deglycase		no	e : enzyme			16.6 : Maintain ; 16.8 : Protect ;	10220166, 12354229, 16181642, 16380269, 17257049, 17933887, 24330391, 25283443, 25561404, 28032445, 30377275	no	2a : Function from experimental evidences in other organisms	2022-01-17	-1	1572400	1572915	516
211	5	Pseudomonas sp. B10	93121953	SEIT01_10259	CDS	automatic/finished		Deglycase PH1704	3.4.22.-, 3.5.1.124	no						no		2022-01-17	1	280915	281454	540
211	5	Pseudomonas sp. B10	93122335	SEIT01_130140	CDS	automatic/finished		protease I	3.5.1.124	no						no		2022-01-17	-1	678285	678866	582
211	5	Pseudomonas sp. SWI36 SWI36_1	77226720	SEIS01_1530004	CDS	automatic/finished		ThiJ/PfpI family protein		no						no		2020-07-15	-2	3658572	3659150	579
211	5	Pseudomonas sp. SWI36 SWI36_2	77221026	SEIQ01_1470036	CDS	automatic/finished		ThiJ/PfpI family protein		no						no		2020-07-15	2	3640883	3641461	579
212	5	Bacillus albus PFYN01	93127965	SEIR01_100002	CDS	automatic/finished	adhB	putative oxidoreductase (involving bacillithiol)	1.1.1.-	no	e : enzyme				7926692, 17586670	no	3 : Putative function from multiple computational evidences	2022-01-17	-1	365294	366427	1134
212	5	Bacillus thuringiensis C15	93117090	SEIU01_400002	CDS	automatic/finished		protein of unknown function		no	u : unknown	1 : Unknown				no	5 : Unknown function	2022-01-17	3	911754	911978	225
212	5	Bacillus thuringiensis C15	93117091	SEIU01_400003	CDS	automatic/finished	adhB	putative oxidoreductase (involving bacillithiol)	1.1.1.-	no	e : enzyme				7926692, 17586670	no	3 : Putative function from multiple computational evidences	2022-01-17	2	911936	912886	951
212	5	Pseudomonas sp. B10	93121796	SEIT01_10102	CDS	automatic/finished	fdhA	Glutathione-independent formaldehyde dehydrogenase	1.2.1.46, 1.2.98.1	no						no		2022-01-17	-1	115143	116342	1200
212	5	Pseudomonas sp. SWI36 SWI36_1	77228171	SEIS01_1930053	CDS	automatic/finished	fdhA	Glutathione-independent formaldehyde dehydrogenase	1.2.1.46, 1.2.98.1	no						no		2020-07-15	1	5264719	5265918	1200
212	5	Pseudomonas sp. SWI36 SWI36_2	77218132	SEIQ01_130053	CDS	automatic/finished	fdhA	Glutathione-independent formaldehyde dehydrogenase	1.2.1.46, 1.2.98.1	no						no		2020-07-15	3	583305	584504	1200
215	5	Bacillus albus PFYN01	93133878	SEIR01_4470015	CDS	automatic/finished	ganQ	galacto-oligosaccharides (galactan) oligomer permease		no	t : transporter			16.1 : Circulate ;	15849754, 16850406, 17056685, 27501980	no	2a : Function from experimental evidences in other organisms	2022-01-17	-1	5746937	5747779	843
215	5	Bacillus thuringiensis C15	93119329	SEIU01_740008	CDS	automatic/finished	ganQ	galacto-oligosaccharides (galactan) oligomer permease		no	t : transporter			16.1 : Circulate ;	15849754, 16850406, 17056685, 27501980	no	2a : Function from experimental evidences in other organisms	2022-01-17	1	3009259	3010101	843
215	5	Pseudomonas sp. B10	93122974	SEIT01_290004	CDS	automatic/finished		glucose/mannose transport system permease protein		no						no		2022-01-17	-2	1366211	1367056	846
215	5	Pseudomonas sp. B10	93127314	SEIT01_1090037	CDS	automatic/finished		sorbitol/mannitol transport system permease protein		no						no		2022-01-17	3	6027069	6027899	831
215	5	Pseudomonas sp. SWI36 SWI36_1	77223366	SEIS01_10223	CDS	automatic/finished	malG	Trehalose/maltose transport system permease protein MalG		no						no		2020-07-15	3	216432	217274	843
215	5	Pseudomonas sp. SWI36 SWI36_1	77224165	SEIS01_370004	CDS	automatic/finished		Carbohydrate ABC transporter permease		no						no		2020-07-15	1	1050148	1050993	846
215	5	Pseudomonas sp. SWI36 SWI36_2	77218491	SEIQ01_340008	CDS	automatic/finished		Carbohydrate ABC transporter permease		no						no		2020-07-15	-3	997442	998287	846
215	5	Pseudomonas sp. SWI36 SWI36_2	77220202	SEIQ01_1330028	CDS	automatic/finished	malG	Trehalose/maltose transport system permease protein MalG		no						no		2020-07-15	-3	2799122	2799964	843
220	5	Bacillus albus PFYN01	93128561	SEIR01_350028	CDS	automatic/finished	hxlR	positive regulator of hxlAB expression (formaldehyde sensing)		no	r : regulator			16.3 : Control ;	15978081, 26973631	no	2a : Function from experimental evidences in other organisms	2022-01-17	-1	880013	880387	375
220	5	Bacillus albus PFYN01	93129256	SEIR01_700005	CDS	automatic/finished	catR	transcriptional repressor of catechol dioxygenase		no	r : regulator			16.3 : Control ;	20639328, 30377275	no	2a : Function from experimental evidences in other organisms	2022-01-17	-1	1499699	1500016	318
220	5	Bacillus albus PFYN01	93130488	SEIR01_1470002	CDS	automatic/finished		MarR family transcriptional regulator		no						no		2022-01-17	-2	2629786	2629980	195
220	5	Bacillus albus PFYN01	93130634	SEIR01_1600001	CDS	automatic/finished	ytcD	putative transcriptional regulator (HxlR family)		no	r : regulator			16.3 : Control ;	23504016	no	3 : Putative function from multiple computational evidences	2022-01-17	3	2760564	2760896	333
220	5	Bacillus albus PFYN01	93130636	SEIR01_1600003	CDS	automatic/finished	ykvN	putative transcriptional regulator (HGT island)		no	r : regulator			16.3 : Control ;	16683018	no	3 : Putative function from multiple computational evidences	2022-01-17	-2	2761891	2762238	348
220	5	Bacillus albus PFYN01	93131893	SEIR01_2790013	CDS	automatic/finished		MarR family transcriptional regulator		no						no		2022-01-17	-3	3907884	3908222	339
220	5	Bacillus albus PFYN01	93131937	SEIR01_2830004	CDS	automatic/finished	hypR	transcriptional regulator (Cys-activated by oxidative stress)		no	r : regulator			16.3 : Control ; 16.8 : Protect ;	22238377	no	2a : Function from experimental evidences in other organisms	2022-01-17	3	3955527	3955907	381
220	5	Bacillus albus PFYN01	93133958	SEIR01_4500018	CDS	automatic/finished		Transcriptional regulator		no						no		2022-01-17	1	5816968	5817291	324
220	5	Bacillus albus PFYN01	93134012	SEIR01_4520020	CDS	automatic/finished	ytcD	putative transcriptional regulator (HxlR family)		no	r : regulator			16.3 : Control ;	23504016	no	3 : Putative function from multiple computational evidences	2022-01-17	2	5868455	5868799	345
220	5	Bacillus albus PFYN01	93134427	SEIR01_4660010	CDS	automatic/finished	catR	transcriptional repressor of catechol dioxygenase		no	r : regulator			16.3 : Control ;	20639328, 30377275	no	2a : Function from experimental evidences in other organisms	2022-01-17	3	6224973	6225287	315
220	5	Bacillus thuringiensis C15	93117385	SEIU01_480059	CDS	automatic/finished	catR	transcriptional repressor of catechol dioxygenase		no	r : regulator			16.3 : Control ;	20639328, 30377275	no	2a : Function from experimental evidences in other organisms	2022-01-17	3	1188150	1188467	318
220	5	Bacillus thuringiensis C15	93117403	SEIU01_480077	CDS	automatic/finished	ytcD	putative transcriptional regulator (HxlR family)		no	r : regulator			16.3 : Control ;	23504016	no	3 : Putative function from multiple computational evidences	2022-01-17	2	1204937	1205281	345
220	5	Bacillus thuringiensis C15	93117407	SEIU01_480081	CDS	automatic/finished	ytcD	putative transcriptional regulator (HxlR family)		no	r : regulator			16.3 : Control ;	23504016	no	3 : Putative function from multiple computational evidences	2022-01-17	-3	1208837	1209163	327
220	5	Bacillus thuringiensis C15	93117408	SEIU01_480082	CDS	automatic/finished	ytcD	putative transcriptional regulator (HxlR family)		no	r : regulator			16.3 : Control ;	23504016	no	3 : Putative function from multiple computational evidences	2022-01-17	-1	1209355	1209699	345
220	5	Bacillus thuringiensis C15	93117422	SEIU01_480096	CDS	automatic/finished		MarR family transcriptional regulator		no						no		2022-01-17	3	1221225	1221548	324
220	5	Bacillus thuringiensis C15	93117795	SEIU01_520111	CDS	automatic/finished		Transcriptional regulator, HxlR		no						no		2022-01-17	-3	1567136	1567474	339
220	5	Bacillus thuringiensis C15	93117981	SEIU01_530023	CDS	automatic/finished	hxlR	positive regulator of hxlAB expression (formaldehyde sensing)		no	r : regulator			16.3 : Control ;	15978081, 26973631	no	2a : Function from experimental evidences in other organisms	2022-01-17	3	1735110	1735484	375
220	5	Bacillus thuringiensis C15	93118549	SEIU01_610062	CDS	automatic/finished	hypR	transcriptional regulator (Cys-activated by oxidative stress)		no	r : regulator			16.3 : Control ; 16.8 : Protect ;	22238377	no	2a : Function from experimental evidences in other organisms	2022-01-17	-1	2264137	2264517	381
220	5	Bacillus thuringiensis C15	93118669	SEIU01_630069	CDS	automatic/finished	ytcD	putative transcriptional regulator (HxlR family)		no	r : regulator			16.3 : Control ;	23504016	no	3 : Putative function from multiple computational evidences	2022-01-17	1	2386537	2386881	345
220	5	Bacillus thuringiensis C15	93118777	SEIU01_630177	CDS	automatic/finished	catR	transcriptional repressor of catechol dioxygenase		no	r : regulator			16.3 : Control ;	20639328, 30377275	no	2a : Function from experimental evidences in other organisms	2022-01-17	-1	2485576	2485890	315
220	5	Bacillus thuringiensis C15	93120659	SEIU01_1020002	CDS	automatic/finished	hxlR	positive regulator of hxlAB expression (formaldehyde sensing)		no	r : regulator			16.3 : Control ;	15978081, 26973631	no	2a : Function from experimental evidences in other organisms	2022-01-17	-3	4304612	4304950	339
220	5	Pseudomonas sp. B10	93124025	SEIT01_390030	CDS	automatic/finished		Transcriptional regulator		no						no		2022-01-17	-2	2500943	2501392	450
220	5	Pseudomonas sp. B10	93124032	SEIT01_390037	CDS	automatic/finished		Transcriptional regulator		no						no		2022-01-17	-3	2508061	2508558	498
220	5	Pseudomonas sp. SWI36 SWI36_1	77223935	SEIS01_240069	CDS	automatic/finished		Transcriptional regulator		no						no		2020-07-15	-2	799887	800330	444
220	5	Pseudomonas sp. SWI36 SWI36_1	77225190	SEIS01_1130026	CDS	automatic/finished		HTH hxlR-type domain-containing protein		no						no		2020-07-15	2	2094947	2095390	444
220	5	Pseudomonas sp. SWI36 SWI36_2	77218913	SEIQ01_570069	CDS	automatic/finished		Transcriptional regulator		no						no		2020-07-15	-1	1438273	1438716	444
220	5	Pseudomonas sp. SWI36 SWI36_2	77219682	SEIQ01_1240025	CDS	automatic/finished		HTH hxlR-type domain-containing protein		no						no		2020-07-15	1	2228590	2229033	444
224	5	Bacillus albus PFYN01	93128457	SEIR01_290007	CDS	automatic/finished	groES	chaperonin small subunit		no	f : factor			16.6 : Maintain ; 16.13 : Shape ;	11407116, 17031040, 9303302	no	2a : Function from experimental evidences in other organisms	2022-01-17	-1	782636	782920	285
224	5	Bacillus thuringiensis C15	93120952	SEIU01_1080007	CDS	automatic/finished	groES	chaperonin small subunit		no	f : factor			16.6 : Maintain ; 16.13 : Shape ;	11407116, 17031040, 9303302	no	2a : Function from experimental evidences in other organisms	2022-01-17	-1	4588288	4588572	285
224	5	Pseudomonas sp. B10	93123603	SEIT01_340050	CDS	automatic/finished	groS	cochaperonin GroES	5.6.1.7	no						no		2022-01-17	3	2074992	2075285	294
224	5	Pseudomonas sp. SWI36 SWI36_1	77226361	SEIS01_1470006	CDS	automatic/finished	groS	cochaperonin GroES		no						no		2020-07-15	1	3289351	3289644	294
224	5	Pseudomonas sp. SWI36 SWI36_2	77218349	SEIQ01_240045	CDS	automatic/finished	groS	cochaperonin GroES		no						no		2020-07-15	-3	823133	823426	294
22539	5	Bacillus albus PFYN01	93130557	SEIR01_1570004	CDS	automatic/finished	mgtA	Mg(2(+)) importing P-type ATPase	7.2.2.14	no						no		2022-01-17	2	2691851	2694556	2706
22539	5	Bacillus albus PFYN01	93130763	SEIR01_1710003	CDS	automatic/finished		P-type Mg2+ transporter	7.2.2.14	no						no		2022-01-17	3	2876481	2878328	1848
22539	5	Bacillus albus PFYN01	93130764	SEIR01_1710004	CDS	automatic/finished		protein of unknown function		no	u : unknown	1 : Unknown				no	5 : Unknown function	2022-01-17	1	2878336	2878524	189
22539	5	Bacillus thuringiensis C15	93120413	SEIU01_960114	CDS	automatic/finished	mgtA	Mg(2(+)) importing P-type ATPase	7.2.2.14	no						no		2022-01-17	-2	4090362	4093067	2706
22539	5	Pseudomonas sp. B10	93122948	SEIT01_280077	CDS	automatic/finished	mgtA	Mg(2(+)) importing P-type ATPase	7.2.2.14	no						no		2022-01-17	1	1337032	1339731	2700
22539	5	Pseudomonas sp. SWI36 SWI36_1	77224450	SEIS01_570039	CDS	automatic/finished	mgtA	Mg(2(+)) importing P-type ATPase	7.2.2.-	no						no		2020-07-15	-1	1360012	1362726	2715
22539	5	Pseudomonas sp. SWI36 SWI36_2	77220145	SEIQ01_1320021	CDS	automatic/finished	mgtA	Mg(2(+)) importing P-type ATPase	7.2.2.-	no						no		2020-07-15	-1	2726971	2729685	2715
227	5	Bacillus albus PFYN01	93130111	SEIR01_1220006	CDS	automatic/finished	ssuC	aliphatic sulfonate ABC transporter (permease)		no	t : transporter			16.1 : Circulate ;	11390694, 15849754, 16513748, 16850406, 16885442, 9782504	no	2a : Function from experimental evidences in other organisms	2022-01-17	-2	2301151	2301999	849
227	5	Bacillus thuringiensis C15	93121312	SEIU01_1190009	CDS	automatic/finished	ssuC	aliphatic sulfonate ABC transporter (permease)		no	t : transporter			16.1 : Circulate ;	11390694, 15849754, 16513748, 16850406, 16885442, 9782504	no	2a : Function from experimental evidences in other organisms	2022-01-17	-2	4906320	4907168	849
227	5	Pseudomonas sp. B10	93122008	SEIT01_10314	CDS	automatic/finished	ssuC	aliphatic sulfonate ABC transporter membrane subunit	7.6.2.14	no						no		2022-01-17	-3	342283	343065	783
227	5	Pseudomonas sp. B10	93124063	SEIT01_390068	CDS	automatic/finished	ssuC	putative aliphatic sulfonates transport permease protein SsuC		no						no	3 : Putative function from multiple computational evidences	2022-01-17	1	2537014	2537853	840
227	5	Pseudomonas sp. B10	93126868	SEIT01_880022	CDS	automatic/finished	tauC	taurine ABC transporter membrane subunit	7.6.2.7	no						no		2022-01-17	2	5548682	5549521	840
227	5	Pseudomonas sp. SWI36 SWI36_1	77226773	SEIS01_1540018	CDS	automatic/finished	tauC	taurine ABC transporter membrane subunit	7.6.2.-	no						no		2020-07-15	-2	3719622	3720461	840
227	5	Pseudomonas sp. SWI36 SWI36_1	77226781	SEIS01_1540026	CDS	automatic/finished	ssuC	aliphatic sulfonate ABC transporter membrane subunit	7.6.2.-	no						no		2020-07-15	2	3727931	3728728	798
227	5	Pseudomonas sp. SWI36 SWI36_2	77221117	SEIQ01_1500015	CDS	automatic/finished	ssuC	aliphatic sulfonate ABC transporter membrane subunit	7.6.2.-	no						no		2020-07-15	-1	3745687	3746484	798
227	5	Pseudomonas sp. SWI36 SWI36_2	77221125	SEIQ01_1500023	CDS	automatic/finished	tauC	taurine ABC transporter membrane subunit	7.6.2.-	no						no		2020-07-15	3	3753954	3754793	840
228	5	Bacillus albus PFYN01	93130110	SEIR01_1220005	CDS	automatic/finished	ssuD	FMNH2-dependent aliphatic sulfonate monooxygenase	1.14.14.5	no	e : enzyme			16.11 : Scavenge (Catabolism) ;	9782504, 11390694, 16513748, 16885442	no	2a : Function from experimental evidences in other organisms	2022-01-17	-3	2299962	2301074	1113
228	5	Bacillus thuringiensis C15	93121311	SEIU01_1190008	CDS	automatic/finished	ssuD	FMNH2-dependent aliphatic sulfonate monooxygenase	1.14.14.5	no	e : enzyme			16.11 : Scavenge (Catabolism) ;	9782504, 11390694, 16513748, 16885442	no	2a : Function from experimental evidences in other organisms	2022-01-17	-3	4905131	4906243	1113
228	5	Pseudomonas sp. B10	93122009	SEIT01_10315	CDS	automatic/finished	ssuD	FMNH2-dependent alkanesulfonate monooxygenase	1.14.14.5	no						no		2022-01-17	-3	343075	344223	1149
228	5	Pseudomonas sp. B10	93125372	SEIT01_560035	CDS	automatic/finished	ssuD	FMNH2-dependent alkanesulfonate monooxygenase	1.14.14.5	no						no		2022-01-17	-1	3958086	3959231	1146
228	5	Pseudomonas sp. SWI36 SWI36_1	77226780	SEIS01_1540025	CDS	automatic/finished	ssuD	FMNH2-dependent alkanesulfonate monooxygenase	1.14.14.5	no						no		2020-07-15	1	3726772	3727920	1149
228	5	Pseudomonas sp. SWI36 SWI36_2	77221118	SEIQ01_1500016	CDS	automatic/finished	ssuD	FMNH2-dependent alkanesulfonate monooxygenase	1.14.14.5	no						no		2020-07-15	-3	3746495	3747643	1149
229	5	Bacillus albus PFYN01	93133778	SEIR01_4450045	CDS	automatic/finished	pitB	putative low-affinity inorganic phosphate transporter		no	t : transporter			16.1 : Circulate ;	10784039, 15849754, 16850406	no	3 : Putative function from multiple computational evidences	2022-01-17	1	5651482	5652480	999
229	5	Bacillus thuringiensis C15	93121175	SEIU01_1180061	CDS	automatic/finished	pitB	putative low-affinity inorganic phosphate transporter		no	t : transporter			16.1 : Circulate ;	10784039, 15849754, 16850406	no	3 : Putative function from multiple computational evidences	2022-01-17	-2	4782702	4783700	999
229	5	Pseudomonas sp. B10	93124721	SEIT01_470026	CDS	automatic/finished	pitB	metal phosphate:H(+) symporter PitB		no						no		2022-01-17	1	3256615	3258090	1476
229	5	Pseudomonas sp. B10	93126641	SEIT01_850004	CDS	automatic/finished	pitA	Low-affinity inorganic phosphate transporter 1		no						no		2022-01-17	1	5319370	5320983	1614
229	5	Pseudomonas sp. SWI36 SWI36_1	77223852	SEIS01_220018	CDS	automatic/finished	pitA	Low-affinity inorganic phosphate transporter 1		no						no		2020-07-15	3	721896	723512	1617
229	5	Pseudomonas sp. SWI36 SWI36_1	77226378	SEIS01_1470023	CDS	automatic/finished	pitB	metal phosphate:H(+) symporter PitB		no						no		2020-07-15	-1	3303952	3305424	1473
229	5	Pseudomonas sp. SWI36 SWI36_2	77218333	SEIQ01_240029	CDS	automatic/finished	pitB	metal phosphate:H(+) symporter PitB		no						no		2020-07-15	2	807353	808825	1473
229	5	Pseudomonas sp. SWI36 SWI36_2	77222982	SEIQ01_2030001	CDS	automatic/finished	pitA	Low-affinity inorganic phosphate transporter 1		no						no		2020-07-15	-3	5678609	5680225	1617
2363	5	Bacillus albus PFYN01	93129125	SEIR01_630007	CDS	automatic/finished		Uncharacterized membrane protein MJ1061		no						no		2022-01-17	-2	1373740	1374765	1026
2363	5	Bacillus albus PFYN01	93132668	SEIR01_3790023	CDS	automatic/finished		Uncharacterized membrane protein MJ1061		no						no		2022-01-17	3	4612323	4613309	987
2363	5	Bacillus thuringiensis C15	93116901	SEIU01_240078	CDS	automatic/finished		Uncharacterized membrane protein MJ1061		no						no		2022-01-17	3	730899	731885	987
2363	5	Pseudomonas sp. B10	93123894	SEIT01_370059	CDS	automatic/finished	pseB	UDP-N-acetylglucosamine 4,6-dehydratase (inverting)	4.2.1.115	no						no		2022-01-17	2	2369786	2370787	1002
2363	5	Pseudomonas sp. B10	93126341	SEIT01_760072	CDS	automatic/finished		FlaA1/EpsC-like NDP-sugar epimerase		no						no		2022-01-17	3	5009352	5011361	2010
2363	5	Pseudomonas sp. SWI36 SWI36_1	77224570	SEIS01_680004	CDS	automatic/finished	capD	Capsular polysaccharide biosynthesis protein CapD		no						no		2020-07-15	-1	1483246	1485243	1998
2363	5	Pseudomonas sp. SWI36 SWI36_1	77224576	SEIS01_680010	CDS	automatic/finished	capD	UDP-glucose 4-epimerase	5.1.3.2	no						no		2020-07-15	-1	1490821	1491855	1035
2363	5	Pseudomonas sp. SWI36 SWI36_2	77219233	SEIQ01_900004	CDS	automatic/finished	capD	Capsular polysaccharide biosynthesis protein CapD		no						no		2020-07-15	-1	1788025	1790022	1998
2363	5	Pseudomonas sp. SWI36 SWI36_2	77219239	SEIQ01_900010	CDS	automatic/finished	capD	UDP-glucose 4-epimerase	5.1.3.2	no						no		2020-07-15	-1	1795600	1796634	1035
2393	5	Bacillus albus PFYN01	93134007	SEIR01_4520015	CDS	automatic/finished	ywnB	putative oxidoreductase	1.-.-.-	no	e : enzyme					no	3 : Putative function from multiple computational evidences	2022-01-17	2	5860553	5861191	639
2393	5	Bacillus thuringiensis C15	93118663	SEIU01_630063	CDS	automatic/finished	ywnB	putative oxidoreductase	1.-.-.-	no	e : enzyme					no	3 : Putative function from multiple computational evidences	2022-01-17	1	2378056	2378694	639
2393	5	Pseudomonas sp. B10	93123631	SEIT01_340078	CDS	automatic/finished		NAD(P)-bd_dom domain-containing protein		no						no		2022-01-17	2	2106026	2106640	615
2393	5	Pseudomonas sp. SWI36 SWI36_1	77226399	SEIS01_1470044	CDS	automatic/finished		NAD(P)-dependent oxidoreductase		no						no		2020-07-15	1	3327775	3328389	615
2393	5	Pseudomonas sp. SWI36 SWI36_2	77218312	SEIQ01_240008	CDS	automatic/finished		NAD(P)-dependent oxidoreductase		no						no		2020-07-15	-3	784388	785002	615
24	5	Bacillus albus PFYN01	93128700	SEIR01_420010	CDS	automatic/finished	hutH	histidine ammonia-lyase (histidase)	4.3.1.3	no	e : enzyme			16.11 : Scavenge (Catabolism) ;	9535092, 10220322, 17395359	no	2a : Function from experimental evidences in other organisms	2022-01-17	3	1014423	1015943	1521
24	5	Bacillus thuringiensis C15	93118941	SEIU01_650045	CDS	automatic/finished	hutH	histidine ammonia-lyase (histidase)	4.3.1.3	no	e : enzyme			16.11 : Scavenge (Catabolism) ;	9535092, 10220322, 17395359	no	2a : Function from experimental evidences in other organisms	2022-01-17	1	2651833	2653353	1521
24	5	Pseudomonas sp. B10	93123288	SEIT01_320019	CDS	automatic/finished	hutH	Histidine ammonia-lyase	4.3.1.3	no						no		2022-01-17	2	1721237	1722760	1524
24	5	Pseudomonas sp. B10	93123289	SEIT01_320020	CDS	automatic/finished	hutH	Histidine ammonia-lyase	4.3.1.3	no						no		2022-01-17	2	1722878	1724410	1533
24	5	Pseudomonas sp. SWI36 SWI36_1	77228574	SEIS01_2090002	CDS	automatic/finished	hutH	Histidine ammonia-lyase	4.3.1.3	no						no		2020-07-15	2	5701319	5702851	1533
24	5	Pseudomonas sp. SWI36 SWI36_2	77223065	SEIQ01_2070012	CDS	automatic/finished	hutH	Histidine ammonia-lyase	4.3.1.3	no						no		2020-07-15	-2	5772777	5774309	1533
24424	5	Bacillus albus PFYN01	93134728	SEIR01_4770005	CDS	automatic/finished	walJ	putative hydrolase		no	e : enzyme			16.3 : Control ;	9829949, 16030236, 21169496	no	3 : Putative function from multiple computational evidences	2022-01-17	3	6492975	6493769	795
24424	5	Bacillus thuringiensis C15	93119802	SEIU01_830005	CDS	automatic/finished	walJ	putative hydrolase		no	e : enzyme			16.3 : Control ;	9829949, 16030236, 21169496	no	3 : Putative function from multiple computational evidences	2022-01-17	2	3490103	3490897	795
24424	5	Pseudomonas sp. B10	93122271	SEIT01_130076	CDS	automatic/finished		MBL fold metallo-hydrolase		no						no		2022-01-17	-3	617368	618126	759
24424	5	Pseudomonas sp. SWI36 SWI36_1	77224940	SEIS01_1010050	CDS	automatic/finished		Metal-dependent hydrolases of the beta-lactamase superfamily I		no						no		2020-07-15	-3	1866185	1866943	759
24424	5	Pseudomonas sp. SWI36 SWI36_2	77221575	SEIQ01_1590050	CDS	automatic/finished		Metal-dependent hydrolases of the beta-lactamase superfamily I		no						no		2020-07-15	-3	4195847	4196605	759
245	5	Bacillus albus PFYN01	93128702	SEIR01_420012	CDS	automatic/finished	hutI	imidazolone-5-propionate hydrolase	3.5.2.7	no	e : enzyme			16.11 : Scavenge (Catabolism) ;	16990261, 17395359, 18296777	no	2a : Function from experimental evidences in other organisms	2022-01-17	2	1017638	1018909	1272
245	5	Bacillus thuringiensis C15	93118943	SEIU01_650047	CDS	automatic/finished	hutI	imidazolone-5-propionate hydrolase	3.5.2.7	no	e : enzyme			16.11 : Scavenge (Catabolism) ;	16990261, 17395359, 18296777	no	2a : Function from experimental evidences in other organisms	2022-01-17	3	2655048	2656319	1272
245	5	Pseudomonas sp. B10	93123290	SEIT01_320021	CDS	automatic/finished	hutI	Imidazolonepropionase	3.5.2.7	no						no		2022-01-17	1	1724659	1725864	1206
245	5	Pseudomonas sp. SWI36 SWI36_1	77228576	SEIS01_2090004	CDS	automatic/finished	hutI	Imidazolonepropionase	3.5.2.7	no						no		2020-07-15	2	5704427	5705632	1206
245	5	Pseudomonas sp. SWI36 SWI36_2	77223063	SEIQ01_2070010	CDS	automatic/finished	hutI	Imidazolonepropionase	3.5.2.7	no						no		2020-07-15	-2	5769996	5771201	1206
25	5	Bacillus albus PFYN01	93128701	SEIR01_420011	CDS	automatic/finished	hutU	urocanase	4.2.1.49	no	e : enzyme			16.11 : Scavenge (Catabolism) ;	15313616, 17395359, 22933560	no	2a : Function from experimental evidences in other organisms	2022-01-17	2	1015967	1017625	1659
25	5	Bacillus thuringiensis C15	93118942	SEIU01_650046	CDS	automatic/finished	hutU	urocanase	4.2.1.49	no	e : enzyme			16.11 : Scavenge (Catabolism) ;	15313616, 17395359, 22933560	no	2a : Function from experimental evidences in other organisms	2022-01-17	3	2653377	2655035	1659
25	5	Pseudomonas sp. B10	93123283	SEIT01_320014	CDS	automatic/finished	hutU	Urocanate hydratase	4.2.1.49	no						no		2022-01-17	2	1715057	1716739	1683
25	5	Pseudomonas sp. SWI36 SWI36_1	77228573	SEIS01_2090001	CDS	automatic/finished	hutU	Urocanate hydratase	4.2.1.49	no						no		2020-07-15	2	5699537	5701210	1674
25	5	Pseudomonas sp. SWI36 SWI36_2	77223066	SEIQ01_2070013	CDS	automatic/finished	hutU	Urocanate hydratase	4.2.1.49	no						no		2020-07-15	-2	5774418	5776091	1674
2514	5	Bacillus albus PFYN01	93134140	SEIR01_4560054	CDS	automatic/finished	yrkI	putative sulfur-carrier protein		no	c : carrier			5.5 : Sulfur metabolism ;	9555915	no	3 : Putative function from multiple computational evidences	2022-01-17	1	5980702	5980932	231
2514	5	Bacillus thuringiensis C15	93117736	SEIU01_520052	CDS	automatic/finished	yrkI	putative sulfur-carrier protein		no	c : carrier			5.5 : Sulfur metabolism ;	9555915	no	3 : Putative function from multiple computational evidences	2022-01-17	2	1516097	1516327	231
2514	5	Pseudomonas sp. B10	93122278	SEIT01_130083	CDS	automatic/finished	tusA	Sulfur carrier protein TusA		no						no		2022-01-17	-3	622639	622878	240
2514	5	Pseudomonas sp. B10	93123202	SEIT01_310027	CDS	automatic/finished	tusA	sulfur transfer protein TusA		no						no		2022-01-17	1	1624264	1624515	252
2514	5	Pseudomonas sp. SWI36 SWI36_1	77224946	SEIS01_1010056	CDS	automatic/finished	tusA	Sulfur carrier protein TusA		no						no		2020-07-15	-1	1871482	1871721	240
2514	5	Pseudomonas sp. SWI36 SWI36_1	77227568	SEIS01_1750001	CDS	automatic/finished	tusA	sulfur transfer protein TusA	2.8.1.-	no						no		2020-07-15	3	4622133	4622375	243
2514	5	Pseudomonas sp. SWI36 SWI36_2	77218780	SEIQ01_500002	CDS	automatic/finished	tusA	Sulfur carrier protein TusA		no						no		2020-07-15	-3	1315199	1315438	240
2514	5	Pseudomonas sp. SWI36 SWI36_2	77221977	SEIQ01_1700029	CDS	automatic/finished	tusA	sulfur transfer protein TusA	2.8.1.-	no						no		2020-07-15	-3	4645538	4645780	243
257	5	Bacillus albus PFYN01	93133820	SEIR01_4450087	CDS	automatic/finished	hisA	phosphoribosylformimino-5-aminoimidazole carboxamide ribotide isomerase	5.3.1.16	no	e : enzyme			16.2 : Construct biomass (Anabolism) ;	1400209, 26294764	no	2a : Function from experimental evidences in other organisms	2022-01-17	-3	5689824	5690543	720
257	5	Bacillus thuringiensis C15	93121133	SEIU01_1180019	CDS	automatic/finished	hisA	phosphoribosylformimino-5-aminoimidazole carboxamide ribotide isomerase	5.3.1.16	no	e : enzyme			16.2 : Construct biomass (Anabolism) ;	1400209, 26294764	no	2a : Function from experimental evidences in other organisms	2022-01-17	2	4744655	4745374	720
257	5	Pseudomonas sp. B10	93124166	SEIT01_410022	CDS	automatic/finished	hisA	1-(5-phosphoribosyl)-5-[(5-phosphoribosylamino)methylideneamino] imidazole-4-carboxamide isomerase	5.3.1.16	no						no		2022-01-17	-2	2649665	2650402	738
257	5	Pseudomonas sp. SWI36 SWI36_1	77228134	SEIS01_1930016	CDS	automatic/finished	hisA	1-(5-phosphoribosyl)-5-[(5-phosphoribosylamino)methylideneamino] imidazole-4-carboxamide isomerase	5.3.1.16	no						no		2020-07-15	3	5222373	5223110	738
257	5	Pseudomonas sp. SWI36 SWI36_2	77218095	SEIQ01_130016	CDS	automatic/finished	hisA	1-(5-phosphoribosyl)-5-[(5-phosphoribosylamino)methylideneamino] imidazole-4-carboxamide isomerase	5.3.1.16	no						no		2020-07-15	2	540959	541696	738
2591	5	Bacillus albus PFYN01	93129151	SEIR01_660005	CDS	automatic/finished		5'-nucleotidase	3.1.3.5	no						no		2022-01-17	2	1402136	1402801	666
2591	5	Bacillus thuringiensis C15	93120297	SEIU01_950012	CDS	automatic/finished		5'-nucleotidase	3.1.3.5	no						no		2022-01-17	3	3994386	3995051	666
2591	5	Pseudomonas sp. B10	93123675	SEIT01_350028	CDS	automatic/finished		5'-nucleotidase	3.1.3.5	no						no		2022-01-17	-3	2142481	2143131	651
2591	5	Pseudomonas sp. SWI36 SWI36_1	77225156	SEIS01_1120158	CDS	automatic/finished		5'-nucleotidase	3.1.3.5	no						no		2020-07-15	-3	2067959	2068654	696
2591	5	Pseudomonas sp. SWI36 SWI36_2	77219416	SEIQ01_1120009	CDS	automatic/finished		5'-nucleotidase	3.1.3.5	no						no		2020-07-15	2	1978610	1979305	696
261	5	Bacillus albus PFYN01	93128679	SEIR01_400008	CDS	automatic/finished	ldeG	hydroxymethylglutaryl-CoA lyase (leucine degradation)	4.1.3.4	no	e : enzyme			16.11 : Scavenge (Catabolism) ;	16330546, 19935659, 22720735	no	2b : Function from indirect experimental evidences (e.g. phenotypes)	2022-01-17	-3	992241	993152	912
261	5	Bacillus thuringiensis C15	93119583	SEIU01_750020	CDS	automatic/finished	ldeG	hydroxymethylglutaryl-CoA lyase (leucine degradation)	4.1.3.4	no	e : enzyme			16.11 : Scavenge (Catabolism) ;	16330546, 19935659, 22720735	no	2b : Function from indirect experimental evidences (e.g. phenotypes)	2022-01-17	-1	3248959	3249870	912
261	5	Pseudomonas sp. B10	93127047	SEIT01_980034	CDS	automatic/finished	liuE	3-hydroxy-3-isohexenylglutaryl-CoA/hydroxy-methylglutaryl-CoA lyase	4.1.3.26, 4.1.3.4	no						no		2022-01-17	-2	5737196	5738095	900
261	5	Pseudomonas sp. SWI36 SWI36_1	77224388	SEIS01_540005	CDS	automatic/finished		Hydroxymethylglutaryl-CoA lyase	4.1.3.4	no						no		2020-07-15	-2	1303920	1304849	930
261	5	Pseudomonas sp. SWI36 SWI36_1	77226946	SEIS01_1580029	CDS	automatic/finished	liuE	3-hydroxy-3-isohexenylglutaryl-CoA/hydroxy-methylglutaryl-CoA lyase	4.1.3.26, 4.1.3.4	no						no		2020-07-15	3	3895458	3896357	900
261	5	Pseudomonas sp. SWI36 SWI36_2	77218800	SEIQ01_520005	CDS	automatic/finished		Hydroxymethylglutaryl-CoA lyase	4.1.3.4	no						no		2020-07-15	3	1336683	1337612	930
261	5	Pseudomonas sp. SWI36 SWI36_2	77221278	SEIQ01_1540009	CDS	automatic/finished	liuE	3-hydroxy-3-isohexenylglutaryl-CoA/hydroxy-methylglutaryl-CoA lyase	4.1.3.26, 4.1.3.4	no						no		2020-07-15	-1	3906673	3907572	900
263	5	Bacillus albus PFYN01	93128222	SEIR01_190006	CDS	automatic/finished	serS	seryl-tRNA synthetase	6.1.1.11	no	e : enzyme			16.2 : Construct biomass (Anabolism) ;	10546897, 12682299, 14732487	no	2a : Function from experimental evidences in other organisms	2022-01-17	2	574310	575584	1275
263	5	Bacillus thuringiensis C15	93120980	SEIU01_1100006	CDS	automatic/finished	serS	seryl-tRNA synthetase	6.1.1.11	no	e : enzyme			16.2 : Construct biomass (Anabolism) ;	10546897, 12682299, 14732487	no	2a : Function from experimental evidences in other organisms	2022-01-17	1	4617484	4618758	1275
263	5	Pseudomonas sp. B10	93127125	SEIT01_980112	CDS	automatic/finished	serS	serine--tRNA ligase	6.1.1.11	no						no		2022-01-17	1	5825686	5826966	1281
263	5	Pseudomonas sp. SWI36 SWI36_1	77227020	SEIS01_1600028	CDS	automatic/finished	serS	serine--tRNA ligase	6.1.1.11	no						no		2020-07-15	-1	3976756	3978036	1281
263	5	Pseudomonas sp. SWI36 SWI36_2	77221829	SEIQ01_1660059	CDS	automatic/finished	serS	serine--tRNA ligase	6.1.1.11	no						no		2020-07-15	3	4484667	4485947	1281
2638	5	Bacillus albus PFYN01	93130017	SEIR01_1130041	CDS	automatic/finished	lutP	L-lactate permease		no	t : transporter			16.1 : Circulate ;	25031425	no	2a : Function from experimental evidences in other organisms	2022-01-17	3	2212572	2214233	1662
2638	5	Bacillus albus PFYN01	93133649	SEIR01_4410018	CDS	automatic/finished	glcA	glycolate/lactate:H(+) symporter GlcA		no						no		2022-01-17	-3	5531319	5532938	1620
2638	5	Bacillus thuringiensis C15	93118813	SEIU01_630213	CDS	automatic/finished	lutP	L-lactate permease		no	t : transporter			16.1 : Circulate ;	25031425	no	2a : Function from experimental evidences in other organisms	2022-01-17	-1	2524306	2525967	1662
2638	5	Bacillus thuringiensis C15	93121514	SEIU01_1290070	CDS	automatic/finished	glcA	glycolate/lactate:H(+) symporter GlcA		no						no		2022-01-17	3	5099985	5101604	1620
2638	5	Pseudomonas sp. B10	93124414	SEIT01_430133	CDS	automatic/finished	glcA	glycolate/lactate:H(+) symporter GlcA		no						no		2022-01-17	3	2924214	2925908	1695
2638	5	Pseudomonas sp. B10	93126620	SEIT01_830020	CDS	automatic/finished	glcA	Glycolate permease GlcA		no						no		2022-01-17	-2	5289146	5290900	1755
2638	5	Pseudomonas sp. SWI36 SWI36_1	77224080	SEIS01_350003	CDS	automatic/finished	glcA	glycolate/lactate:H(+) symporter GlcA		no						no		2020-07-15	-3	960692	962362	1671
2638	5	Pseudomonas sp. SWI36 SWI36_2	77219130	SEIQ01_790003	CDS	automatic/finished	glcA	glycolate/lactate:H(+) symporter GlcA		no						no		2020-07-15	-2	1676193	1677863	1671
26421	5	Bacillus albus PFYN01	93128956	SEIR01_550018	CDS	automatic/finished		sulfide:quinone oxidoreductase	1.8.5.4	no						no		2022-01-17	-3	1231839	1232879	1041
26421	5	Bacillus thuringiensis C15	93120245	SEIU01_920029	CDS	automatic/finished		sulfide:quinone oxidoreductase	1.8.5.4	no						no		2022-01-17	-3	3930305	3931504	1200
26421	5	Pseudomonas sp. B10	93126051	SEIT01_680032	CDS	automatic/finished		sulfide:quinone oxidoreductase	1.8.5.4	no						no		2022-01-17	3	4663434	4664678	1245
26421	5	Pseudomonas sp. SWI36 SWI36_1	77225115	SEIS01_1120117	CDS	automatic/finished		NAD(P)/FAD-dependent oxidoreductase		no						no		2020-07-15	1	2030281	2031549	1269
26421	5	Pseudomonas sp. SWI36 SWI36_2	77219457	SEIQ01_1120050	CDS	automatic/finished		NAD(P)/FAD-dependent oxidoreductase		no						no		2020-07-15	-2	2015715	2016983	1269
265	5	Bacillus albus PFYN01	93127711	SEIR01_10150	CDS	automatic/finished	azoJ	FMN-dependent NADH-azoreductase involved in aromatic hydrocarbons catabolism	1.7.1.17, 1.6.5.-	no	e : enzyme				11886746, 18208493, 22200572, 32801174	no	2a : Function from experimental evidences in other organisms	2022-01-17	-1	146735	147361	627
265	5	Bacillus albus PFYN01	93132128	SEIR01_3110001	CDS	automatic/finished	azoRB	NADH:dichloroindophenol oxidoreductase (2-methylhydroquinone resistance)		no	e : enzyme			16.8 : Protect ; 16.11 : Scavenge (Catabolism) ;	17284825, 17725564, 18208493	no	2a : Function from experimental evidences in other organisms	2022-01-17	2	4113116	4113751	636
265	5	Bacillus albus PFYN01	93132825	SEIR01_4120019	CDS	automatic/finished	azoJ	FMN-dependent NADH-azoreductase involved in aromatic hydrocarbons catabolism	1.7.1.17, 1.6.5.-	no	e : enzyme				11886746, 18208493, 22200572, 32801174	no	2a : Function from experimental evidences in other organisms	2022-01-17	3	4758111	4758803	693
265	5	Bacillus thuringiensis C15	93116399	SEIU01_10228	CDS	automatic/finished	azoJ	FMN-dependent NADH-azoreductase involved in aromatic hydrocarbons catabolism	1.7.1.17, 1.6.5.-	no	e : enzyme				11886746, 18208493, 22200572, 32801174	no	2a : Function from experimental evidences in other organisms	2022-01-17	2	218033	218725	693
265	5	Bacillus thuringiensis C15	93116547	SEIU01_20114	CDS	automatic/finished	azoJ	FMN-dependent NADH-azoreductase involved in aromatic hydrocarbons catabolism	1.7.1.17, 1.6.5.-	no	e : enzyme				11886746, 18208493, 22200572, 32801174	no	2a : Function from experimental evidences in other organisms	2022-01-17	-3	367397	368023	627
265	5	Bacillus thuringiensis C15	93117535	SEIU01_500015	CDS	automatic/finished	azoRB	NADH:dichloroindophenol oxidoreductase (2-methylhydroquinone resistance)		no	e : enzyme			16.8 : Protect ; 16.11 : Scavenge (Catabolism) ;	17284825, 17725564, 18208493	no	2a : Function from experimental evidences in other organisms	2022-01-17	2	1324526	1325161	636
265	5	Pseudomonas sp. B10	93122205	SEIT01_130010	CDS	automatic/finished	azoR	FMN-dependent NADH:quinone oxidoreductase 2	1.6.5.-, 1.7.1.17	no						no		2022-01-17	-3	550984	551583	600
265	5	Pseudomonas sp. B10	93124116	SEIT01_400039	CDS	automatic/finished	azoR	FMN-dependent NADH:quinone oxidoreductase 1	1.6.5.-, 1.7.1.17	no						no		2022-01-17	3	2589933	2590571	639
265	5	Pseudomonas sp. B10	93127342	SEIT01_1090065	CDS	automatic/finished	azoR	FMN-dependent NADH:quinone oxidoreductase 3	1.6.5.-, 1.7.1.17	no						no		2022-01-17	-1	6054456	6055067	612
265	5	Pseudomonas sp. SWI36 SWI36_1	77225448	SEIS01_1310062	CDS	automatic/finished	azoR	FMN-dependent NADH-azoreductase 1	1.7.1.17	no						no		2020-07-15	-1	2359843	2360454	612
265	5	Pseudomonas sp. SWI36 SWI36_1	77226438	SEIS01_1480032	CDS	automatic/finished	azoR	FMN-dependent NADH-azoreductase 2	1.7.1.17	no						no		2020-07-15	-2	3366474	3367073	600
265	5	Pseudomonas sp. SWI36 SWI36_2	77218472	SEIQ01_320014	CDS	automatic/finished	azoR	FMN-dependent NADH-azoreductase 1	1.7.1.17	no						no		2020-07-15	-1	974497	975108	612
265	5	Pseudomonas sp. SWI36 SWI36_2	77223043	SEIQ01_2060008	CDS	automatic/finished	azoR	FMN-dependent NADH-azoreductase 2	1.7.1.17	no						no		2020-07-15	-2	5744121	5744720	600
2660	5	Bacillus albus PFYN01	93132880	SEIR01_4210024	CDS	automatic/finished		trans-2,3-dihydro-3-hydroxyanthranilate isomerase	5.3.3.17	no						no		2022-01-17	-2	4811452	4812309	858
2660	5	Bacillus thuringiensis C15	93117560	SEIU01_500040	CDS	automatic/finished		trans-2,3-dihydro-3-hydroxyanthranilate isomerase	5.3.3.17	no						no		2022-01-17	1	1346020	1346883	864
2660	5	Pseudomonas sp. B10	93123573	SEIT01_340020	CDS	automatic/finished		Uncharacterized isomerase PA3578	5.1.-.-	no						no		2022-01-17	1	2050000	2050782	783
2660	5	Pseudomonas sp. SWI36 SWI36_1	77227599	SEIS01_1760002	CDS	automatic/finished		Phenazine biosynthesis protein PhzF like		no						no		2020-07-15	3	4654875	4655663	789
2660	5	Pseudomonas sp. SWI36 SWI36_2	77221979	SEIQ01_1710002	CDS	automatic/finished		Phenazine biosynthesis protein PhzF like		no						no		2020-07-15	3	4647192	4647980	789
2668	5	Bacillus albus PFYN01	93130721	SEIR01_1680036	CDS	automatic/finished	yddQ	putative hydrolase	3.-.-.-	no	e : enzyme			16.11 : Scavenge (Catabolism) ;		no	3 : Putative function from multiple computational evidences	2022-01-17	1	2839384	2839929	546
2668	5	Bacillus thuringiensis C15	93119884	SEIU01_850023	CDS	automatic/finished	yddQ	putative hydrolase	3.-.-.-	no	e : enzyme			16.11 : Scavenge (Catabolism) ;		no	3 : Putative function from multiple computational evidences	2022-01-17	-1	3565891	3566436	546
2668	5	Pseudomonas sp. B10	93122645	SEIT01_260043	CDS	automatic/finished		Nicotinamidase-like amidase		no						no		2022-01-17	-3	1009741	1010454	714
2668	5	Pseudomonas sp. B10	93123788	SEIT01_360047	CDS	automatic/finished		putative isochorismatase		no						no	3 : Putative function from multiple computational evidences	2022-01-17	-1	2260800	2261390	591
2668	5	Pseudomonas sp. B10	93125894	SEIT01_650136	CDS	automatic/finished	yddQ	Uncharacterized isochorismatase family protein YddQ	3.-.-.-	no						no		2022-01-17	2	4505741	4506295	555
2668	5	Pseudomonas sp. SWI36 SWI36_1	77224766	SEIS01_820003	CDS	automatic/finished		Isochorismatase	3.3.2.1	no						no		2020-07-15	3	1706604	1707194	591
2668	5	Pseudomonas sp. SWI36 SWI36_1	77228653	SEIS01_2130015	CDS	automatic/finished	yddQ	Uncharacterized isochorismatase family protein YddQ	3.-.-.-	no						no		2020-07-15	-3	5782235	5782783	549
2668	5	Pseudomonas sp. SWI36 SWI36_2	77217959	SEIQ01_50009	CDS	automatic/finished	yddQ	Uncharacterized isochorismatase family protein YddQ	3.-.-.-	no						no		2020-07-15	1	396229	396777	549
2668	5	Pseudomonas sp. SWI36 SWI36_2	77222677	SEIQ01_1920021	CDS	automatic/finished		Isochorismatase	3.3.2.1	no						no		2020-07-15	2	5385998	5386588	591
267	5	Bacillus albus PFYN01	93130711	SEIR01_1680026	CDS	automatic/finished	gatA	glutamyl-tRNA(Gln) amidotransferase (subunit A)	6.3.5.7	no	e : enzyme			16.2 : Construct biomass (Anabolism) ;	11445070, 12682299, 9342321	no	2a : Function from experimental evidences in other organisms	2022-01-17	-2	2831371	2832828	1458
267	5	Bacillus thuringiensis C15	93119894	SEIU01_850033	CDS	automatic/finished	gatA	glutamyl-tRNA(Gln) amidotransferase (subunit A)	6.3.5.7	no	e : enzyme			16.2 : Construct biomass (Anabolism) ;	11445070, 12682299, 9342321	no	2a : Function from experimental evidences in other organisms	2022-01-17	2	3572993	3574450	1458
267	5	Pseudomonas sp. B10	93124324	SEIT01_430043	CDS	automatic/finished	gatA	Glutamyl-tRNA(Gln) amidotransferase subunit A	6.3.5.7	no						no		2022-01-17	1	2820343	2821794	1452
267	5	Pseudomonas sp. B10	93127217	SEIT01_1030006	CDS	automatic/finished		amidase	3.5.1.4	no						no		2022-01-17	2	5913833	5915290	1458
267	5	Pseudomonas sp. SWI36 SWI36_1	77224720	SEIS01_790040	CDS	automatic/finished	gatA	Glutamyl-tRNA(Gln) amidotransferase subunit A	6.3.5.7	no						no		2020-07-15	-3	1659758	1661209	1452
267	5	Pseudomonas sp. SWI36 SWI36_1	77228284	SEIS01_1970016	CDS	automatic/finished		Aspartyl-tRNA(Asn) amidotransferase subunit A		no						no		2020-07-15	-1	5390995	5392404	1410
267	5	Pseudomonas sp. SWI36 SWI36_2	77219353	SEIQ01_1010037	CDS	automatic/finished	gatA	Glutamyl-tRNA(Gln) amidotransferase subunit A	6.3.5.7	no						no		2020-07-15	1	1913614	1915065	1452
267	5	Pseudomonas sp. SWI36 SWI36_2	77222483	SEIQ01_1870016	CDS	automatic/finished		Aspartyl-tRNA(Asn) amidotransferase subunit A		no						no		2020-07-15	-3	5188325	5189734	1410
268	5	Bacillus albus PFYN01	93130710	SEIR01_1680025	CDS	automatic/finished	gatB	glutamyl-tRNA(Gln) amidotransferase (subunit B)	6.3.5.7	no	e : enzyme			16.2 : Construct biomass (Anabolism) ;	11445070, 12682299, 9342321	no	2a : Function from experimental evidences in other organisms	2022-01-17	-1	2829929	2831356	1428
268	5	Bacillus thuringiensis C15	93119895	SEIU01_850034	CDS	automatic/finished	gatB	glutamyl-tRNA(Gln) amidotransferase (subunit B)	6.3.5.7	no	e : enzyme			16.2 : Construct biomass (Anabolism) ;	11445070, 12682299, 9342321	no	2a : Function from experimental evidences in other organisms	2022-01-17	1	3574465	3575892	1428
268	5	Pseudomonas sp. B10	93124325	SEIT01_430044	CDS	automatic/finished	gatB	Aspartyl/glutamyl-tRNA(Asn/Gln) amidotransferase subunit B	6.3.5.-	no						no		2022-01-17	2	2821805	2823250	1446
268	5	Pseudomonas sp. SWI36 SWI36_1	77224719	SEIS01_790039	CDS	automatic/finished	gatB	Aspartyl/glutamyl-tRNA(Asn/Gln) amidotransferase subunit B	6.3.5.-	no						no		2020-07-15	-2	1658301	1659746	1446
268	5	Pseudomonas sp. SWI36 SWI36_2	77219354	SEIQ01_1010038	CDS	automatic/finished	gatB	Aspartyl/glutamyl-tRNA(Asn/Gln) amidotransferase subunit B	6.3.5.-	no						no		2020-07-15	3	1915077	1916522	1446
269	5	Bacillus albus PFYN01	93131391	SEIR01_2230137	CDS	automatic/finished	mscL	large conductance mechanosensitive channel protein		no	t : transporter			16.1 : Circulate ; 16.8 : Protect ; 16.13 : Shape ;	12948773, 15063854, 15165739, 16897034, 22685134, 22720735	no	2a : Function from experimental evidences in other organisms	2022-01-17	2	3454160	3454564	405
269	5	Bacillus thuringiensis C15	93120929	SEIU01_1070191	CDS	automatic/finished	mscL	large conductance mechanosensitive channel protein		no	t : transporter			16.1 : Circulate ; 16.8 : Protect ; 16.13 : Shape ;	12948773, 15063854, 15165739, 16897034, 22685134, 22720735	no	2a : Function from experimental evidences in other organisms	2022-01-17	1	4566415	4566813	399
269	5	Pseudomonas sp. B10	93122054	SEIT01_20037	CDS	automatic/finished	mscL	large conductance mechanosensitive channel		no						no		2022-01-17	-2	389117	389581	465
269	5	Pseudomonas sp. SWI36 SWI36_1	77225591	SEIS01_1340026	CDS	automatic/finished	mscL	large conductance mechanosensitive channel		no						no		2020-07-15	2	2506310	2506729	420
269	5	Pseudomonas sp. SWI36 SWI36_2	77219993	SEIQ01_1290032	CDS	automatic/finished	mscL	large conductance mechanosensitive channel		no						no		2020-07-15	-3	2570159	2570578	420
27621	5	Bacillus albus PFYN01	93128135	SEIR01_140006	CDS	automatic/finished	mbtH	stimulator of DhbF tyrosine adenylation activity		no	r : regulator			16.2 : Construct biomass (Anabolism) ; 16.11 : Scavenge (Catabolism) ;	11112781, 20845982, 21890635, 24975514, 28880538	no	2a : Function from experimental evidences in other organisms	2022-01-17	2	504383	504607	225
27621	5	Bacillus thuringiensis C15	93120274	SEIU01_940006	CDS	automatic/finished	mbtH	stimulator of DhbF tyrosine adenylation activity		no	r : regulator			16.2 : Construct biomass (Anabolism) ; 16.11 : Scavenge (Catabolism) ;	11112781, 20845982, 21890635, 24975514, 28880538	no	2a : Function from experimental evidences in other organisms	2022-01-17	2	3965915	3966139	225
27621	5	Pseudomonas sp. B10	93125354	SEIT01_560017	CDS	automatic/finished	mbtH	Protein MbtH		no						no		2022-01-17	2	3943490	3943714	225
27621	5	Pseudomonas sp. B10	93126844	SEIT01_870165	CDS	automatic/finished		MbtH protein		no						no		2022-01-17	-1	5521092	5521298	207
27621	5	Pseudomonas sp. SWI36 SWI36_1	77223821	SEIS01_200013	CDS	automatic/finished	mbtH	Protein MbtH		no						no		2020-07-15	1	691420	691641	222
27621	5	Pseudomonas sp. SWI36 SWI36_2	77218282	SEIQ01_220004	CDS	automatic/finished	mbtH	Protein MbtH		no						no		2020-07-15	-2	751539	751760	222
279	5	Bacillus albus PFYN01	93133918	SEIR01_4490004	CDS	automatic/finished	yqjM	NADPH-dependent flavin oxidoreductase (acting on cinnamaldehyde-related compounds)	1.6.99.1	no	e : enzyme			16.2 : Construct biomass (Anabolism) ; 16.8 : Protect ;	12660247, 15249051, 15890652, 20011599, 20461254	no	2a : Function from experimental evidences in other organisms	2022-01-17	-2	5782084	5783121	1038
279	5	Bacillus thuringiensis C15	93117477	SEIU01_490048	CDS	automatic/finished	yqjM	NADPH-dependent flavin oxidoreductase (acting on cinnamaldehyde-related compounds)	1.6.99.1	no	e : enzyme			16.2 : Construct biomass (Anabolism) ; 16.8 : Protect ;	12660247, 15249051, 15890652, 20011599, 20461254	no	2a : Function from experimental evidences in other organisms	2022-01-17	-2	1271724	1272761	1038
279	5	Pseudomonas sp. B10	93125044	SEIT01_520036	CDS	automatic/finished	namA	NADPH dehydrogenase	1.6.99.1	no						no		2022-01-17	1	3587818	3588924	1107
279	5	Pseudomonas sp. SWI36 SWI36_1	77224508	SEIS01_610001	CDS	automatic/finished	namA	NADPH dehydrogenase	1.6.99.1	no						no		2020-07-15	3	1425999	1427105	1107
279	5	Pseudomonas sp. SWI36 SWI36_1	77227689	SEIS01_1780030	CDS	automatic/finished	namA	NADPH dehydrogenase	1.6.99.1	no						no		2020-07-15	-3	4745957	4747048	1092
279	5	Pseudomonas sp. SWI36 SWI36_2	77220500	SEIQ01_1380002	CDS	automatic/finished	namA	NADPH dehydrogenase	1.6.99.1	no						no		2020-07-15	1	3104059	3105150	1092
279	5	Pseudomonas sp. SWI36 SWI36_2	77222106	SEIQ01_1750009	CDS	automatic/finished	namA	NADPH dehydrogenase	1.6.99.1	no						no		2020-07-15	-2	4775667	4776773	1107
2850	5	Bacillus albus PFYN01	93129869	SEIR01_1120043	CDS	automatic/finished	glsB	L-glutamine amidohydrolase; glutaminase	3.5.1.2	no	e : enzyme			16.11 : Scavenge (Catabolism) ;	18459799	no	2a : Function from experimental evidences in other organisms	2022-01-17	1	2064631	2065560	930
2850	5	Bacillus albus PFYN01	93130938	SEIR01_1880003	CDS	automatic/finished	glsA	glutaminase	3.5.1.2	no	e : enzyme			16.11 : Scavenge (Catabolism) ;	15995196, 18459799, 20050917	no	2a : Function from experimental evidences in other organisms	2022-01-17	2	3019583	3020563	981
2850	5	Bacillus thuringiensis C15	93116636	SEIU01_110003	CDS	automatic/finished	glsA	glutaminase	3.5.1.2	no	e : enzyme			16.11 : Scavenge (Catabolism) ;	15995196, 18459799, 20050917	no	2a : Function from experimental evidences in other organisms	2022-01-17	1	462583	463563	981
2850	5	Bacillus thuringiensis C15	93120028	SEIU01_850167	CDS	automatic/finished	glsB	L-glutamine amidohydrolase; glutaminase	3.5.1.2	no	e : enzyme			16.11 : Scavenge (Catabolism) ;	18459799	no	2a : Function from experimental evidences in other organisms	2022-01-17	-2	3714954	3715883	930
2850	5	Pseudomonas sp. B10	93123104	SEIT01_300037	CDS	automatic/finished	glsB	glutaminase 2	3.5.1.2	no						no		2022-01-17	2	1526021	1526929	909
2850	5	Pseudomonas sp. SWI36 SWI36_1	77226493	SEIS01_1490043	CDS	automatic/finished	glsB	glutaminase 2	3.5.1.2	no						no		2020-07-15	3	3413883	3414791	909
2850	5	Pseudomonas sp. SWI36 SWI36_2	77217734	SEIQ01_10159	CDS	automatic/finished	glsB	glutaminase 2	3.5.1.2	no						no		2020-07-15	2	155363	156271	909
28548	5	Bacillus albus PFYN01	93134423	SEIR01_4660006	CDS	automatic/finished	mnaA	UDP-N-acetylmannosamine 2-epimerase	5.1.3.14	no	e : enzyme			16.8 : Protect ; 16.13 : Shape ;	12107153, 16952950	no	2a : Function from experimental evidences in other organisms	2022-01-17	1	6220726	6221841	1116
28548	5	Bacillus thuringiensis C15	93118781	SEIU01_630181	CDS	automatic/finished	mnaA	UDP-N-acetylmannosamine 2-epimerase	5.1.3.14	no	e : enzyme			16.8 : Protect ; 16.13 : Shape ;	12107153, 16952950	no	2a : Function from experimental evidences in other organisms	2022-01-17	-2	2489022	2490137	1116
28548	5	Pseudomonas sp. B10	93126339	SEIT01_760070	CDS	automatic/finished	wecB	UDP-N-acetylglucosamine 2-epimerase	5.1.3.14	no						no		2022-01-17	-3	5007160	5008287	1128
28548	5	Pseudomonas sp. SWI36 SWI36_1	77224779	SEIS01_850001	CDS	automatic/finished	wecB	UDP-N-acetylglucosamine 2-epimerase	5.1.3.14	no						no		2020-07-15	-2	1718667	1719809	1143
28548	5	Pseudomonas sp. SWI36 SWI36_2	77219207	SEIQ01_820001	CDS	automatic/finished	wecB	UDP-N-acetylglucosamine 2-epimerase	5.1.3.14	no						no		2020-07-15	-3	1757780	1758922	1143
2891	5	Bacillus albus PFYN01	93129468	SEIR01_850006	CDS	automatic/finished	pxpC	L-5-oxoprolinase (ATP-dependent) subunit C	3.5.2.9	no	e : enzyme			16.6 : Maintain ; 16.8 : Protect ; 16.11 : Scavenge (Catabolism) ;	9334321, 18823995, 19040634, 20524093, 21050859, 21245531, 22277658, 28830929	no	2a : Function from experimental evidences in other organisms	2022-01-17	-2	1696267	1697256	990
2891	5	Bacillus albus PFYN01	93129469	SEIR01_850007	CDS	automatic/finished	pxpB	L-5-oxoprolinase (ATP-dependent) subunit B	3.5.2.9	no	e : enzyme			16.6 : Maintain ; 16.8 : Protect ;	9334321, 18823995, 19040634, 20524093, 21050859, 21245531, 22277658, 28830929	no	2a : Function from experimental evidences in other organisms	2022-01-17	-3	1697247	1697960	714
2891	5	Bacillus thuringiensis C15	93117666	SEIU01_510064	CDS	automatic/finished	pxpC	L-5-oxoprolinase (ATP-dependent) subunit C	3.5.2.9	no	e : enzyme			16.6 : Maintain ; 16.8 : Protect ; 16.11 : Scavenge (Catabolism) ;	9334321, 18823995, 19040634, 20524093, 21050859, 21245531, 22277658, 28830929	no	2a : Function from experimental evidences in other organisms	2022-01-17	-3	1451153	1452142	990
2891	5	Bacillus thuringiensis C15	93117667	SEIU01_510065	CDS	automatic/finished	pxpB	L-5-oxoprolinase (ATP-dependent) subunit B	3.5.2.9	no	e : enzyme			16.6 : Maintain ; 16.8 : Protect ;	9334321, 18823995, 19040634, 20524093, 21050859, 21245531, 22277658, 28830929	no	2a : Function from experimental evidences in other organisms	2022-01-17	-1	1452133	1452846	714
2891	5	Pseudomonas sp. B10	93122229	SEIT01_130034	CDS	automatic/finished		Allophanate hydrolase		no						no		2022-01-17	-3	579898	580602	705
2891	5	Pseudomonas sp. SWI36 SWI36_1	77227914	SEIS01_1850004	CDS	automatic/finished	pxpB	5-oxoprolinase component B	3.5.2.9	no						no		2020-07-15	1	4996552	4997238	687
2891	5	Pseudomonas sp. SWI36 SWI36_2	77220534	SEIQ01_1380036	CDS	automatic/finished	pxpB	5-oxoprolinase component B	3.5.2.9	no						no		2020-07-15	2	3137630	3138316	687
297	5	Bacillus albus PFYN01	93132317	SEIR01_3340038	CDS	automatic/finished	trpC	Indole-3-glycerol phosphate synthase	4.1.1.48	no						no		2022-01-17	-2	4282804	4283565	762
297	5	Bacillus thuringiensis C15	93118093	SEIU01_540050	CDS	automatic/finished	trpC	Indole-3-glycerol phosphate synthase	4.1.1.48	no						no		2022-01-17	1	1834726	1835487	762
297	5	Pseudomonas sp. B10	93121710	SEIT01_10016	CDS	automatic/finished	trpC	Indole-3-glycerol phosphate synthase	4.1.1.48	no						no		2022-01-17	-1	13596	14432	837
297	5	Pseudomonas sp. SWI36 SWI36_1	77227125	SEIS01_1620021	CDS	automatic/finished	trpC	Indole-3-glycerol phosphate synthase	4.1.1.48	no						no		2020-07-15	1	4122532	4123365	834
297	5	Pseudomonas sp. SWI36 SWI36_2	77221511	SEIQ01_1580021	CDS	automatic/finished	trpC	Indole-3-glycerol phosphate synthase	4.1.1.48	no						no		2020-07-15	1	4148986	4149819	834
307	5	Bacillus albus PFYN01	93134266	SEIR01_4590019	CDS	automatic/finished	hpd	4-hydroxyphenylpyruvate dioxygenase	1.13.11.27	no						no		2022-01-17	-1	6092033	6093151	1119
307	5	Bacillus thuringiensis C15	93120595	SEIU01_990005	CDS	automatic/finished	hpd	4-hydroxyphenylpyruvate dioxygenase	1.13.11.27	no						no		2022-01-17	1	4244263	4245381	1119
307	5	Pseudomonas sp. B10	93123473	SEIT01_330006	CDS	automatic/finished	hpd	4-hydroxyphenylpyruvate dioxygenase	1.13.11.27	no						no		2022-01-17	-1	1940259	1941335	1077
307	5	Pseudomonas sp. SWI36 SWI36_1	77224271	SEIS01_460013	CDS	automatic/finished	hpd	4-hydroxyphenylpyruvate dioxygenase	1.13.11.27	no						no		2020-07-15	-3	1169855	1170931	1077
307	5	Pseudomonas sp. SWI36 SWI36_2	77222209	SEIQ01_1770052	CDS	automatic/finished	hpd	4-hydroxyphenylpyruvate dioxygenase	1.13.11.27	no						no		2020-07-15	1	4890136	4891212	1077
3085	5	Bacillus albus PFYN01	93130840	SEIR01_1790021	CDS	automatic/finished	adk	adenylate kinase	2.7.4.3	no	e : enzyme			16.2 : Construct biomass (Anabolism) ; 16.7 : Manage energy ;	8061005, 8288548, 9056261, 9715904, 11106368, 16452168	no	2a : Function from experimental evidences in other organisms	2022-01-17	-3	2931666	2932316	651
3085	5	Bacillus thuringiensis C15	93118336	SEIU01_580021	CDS	automatic/finished	adk	adenylate kinase	2.7.4.3	no	e : enzyme			16.2 : Construct biomass (Anabolism) ; 16.7 : Manage energy ;	8061005, 8288548, 9056261, 9715904, 11106368, 16452168	no	2a : Function from experimental evidences in other organisms	2022-01-17	-2	2060757	2061407	651
3085	5	Pseudomonas sp. B10	93126156	SEIT01_710015	CDS	automatic/finished	adk	adenylate kinase	2.7.4.3, 2.7.4.4	no						no		2022-01-17	-1	4772493	4773143	651
3085	5	Pseudomonas sp. SWI36 SWI36_1	77225527	SEIS01_1330020	CDS	automatic/finished	adk	adenylate kinase	2.7.4.3, 2.7.4.4	no						no		2020-07-15	2	2444270	2444920	651
3085	5	Pseudomonas sp. SWI36 SWI36_2	77219898	SEIQ01_1270039	CDS	automatic/finished	adk	adenylate kinase	2.7.4.3, 2.7.4.4	no						no		2020-07-15	-3	2452079	2452729	651
310	5	Bacillus albus PFYN01	93134443	SEIR01_4670006	CDS	automatic/finished	glgA	glycogen (starch) synthase	2.4.1.21	no	e : enzyme			16.14 : Store ;	8145641, 15272305	no	2a : Function from experimental evidences in other organisms	2022-01-17	1	6239770	6241266	1497
310	5	Bacillus thuringiensis C15	93117320	SEIU01_470106	CDS	automatic/finished	glgA	glycogen (starch) synthase	2.4.1.21	no	e : enzyme			16.14 : Store ;	8145641, 15272305	no	2a : Function from experimental evidences in other organisms	2022-01-17	-2	1114578	1116074	1497
310	5	Pseudomonas sp. B10	93127401	SEIT01_1090124	CDS	automatic/finished	glgA	glycogen synthase	2.4.1.21	no						no		2022-01-17	1	6114697	6116283	1587
310	5	Pseudomonas sp. SWI36 SWI36_1	77227067	SEIS01_1600075	CDS	automatic/finished	glgA	glycogen synthase	2.4.1.21	no						no		2020-07-15	1	4029886	4031445	1560
310	5	Pseudomonas sp. SWI36 SWI36_2	77221782	SEIQ01_1660012	CDS	automatic/finished	glgA	glycogen synthase	2.4.1.21	no						no		2020-07-15	-2	4431258	4432817	1560
3120	5	Bacillus albus PFYN01	93133998	SEIR01_4520006	CDS	automatic/finished	yvdD	putative enzyme		no	e : enzyme					no	3 : Putative function from multiple computational evidences	2022-01-17	-3	5851140	5851718	579
3120	5	Bacillus thuringiensis C15	93118655	SEIU01_630055	CDS	automatic/finished	yvdD	putative enzyme		no	e : enzyme					no	3 : Putative function from multiple computational evidences	2022-01-17	-2	2368635	2369213	579
3120	5	Pseudomonas sp. B10	93124090	SEIT01_400013	CDS	automatic/finished		Cytokinin riboside 5'-monophosphate phosphoribohydrolase	3.2.2.4	no						no		2022-01-17	-3	2564743	2565330	588
3120	5	Pseudomonas sp. SWI36 SWI36_1	77223789	SEIS01_180013	CDS	automatic/finished		Cytokinin riboside 5'-monophosphate phosphoribohydrolase	3.2.2.4	no						no		2020-07-15	-2	662022	662609	588
3120	5	Pseudomonas sp. SWI36 SWI36_2	77218276	SEIQ01_210013	CDS	automatic/finished		Cytokinin riboside 5'-monophosphate phosphoribohydrolase	3.2.2.4	no						no		2020-07-15	-2	747441	748028	588
3124	5	Bacillus albus PFYN01	93128545	SEIR01_350012	CDS	automatic/finished	unpK	undecaprenol kinase	2.7.1.66	no	e : enzyme			16.2 : Construct biomass (Anabolism) ;	12923107, 17535816, 19935659, 28872301	no	2a : Function from experimental evidences in other organisms	2022-01-17	-2	862942	863295	354
3124	5	Bacillus thuringiensis C15	93117998	SEIU01_530040	CDS	automatic/finished	unpK	undecaprenol kinase	2.7.1.66	no	e : enzyme			16.2 : Construct biomass (Anabolism) ;	12923107, 17535816, 19935659, 28872301	no	2a : Function from experimental evidences in other organisms	2022-01-17	3	1752201	1752554	354
3124	5	Pseudomonas sp. B10	93125665	SEIT01_620037	CDS	automatic/finished	dgkA	Diacylglycerol kinase	2.7.1.107	no						no		2022-01-17	-2	4261991	4262353	363
3124	5	Pseudomonas sp. SWI36 SWI36_1	77228102	SEIS01_1920011	CDS	automatic/finished	dgkA	Diacylglycerol kinase	2.7.1.107	no						no		2020-07-15	2	5193977	5194342	366
3124	5	Pseudomonas sp. SWI36 SWI36_2	77222970	SEIQ01_2020014	CDS	automatic/finished	dgkA	Diacylglycerol kinase	2.7.1.107	no						no		2020-07-15	-2	5666940	5667305	366
314	5	Bacillus albus PFYN01	93129249	SEIR01_690007	CDS	automatic/finished		putative non-heme chloroperoxidase	1.11.1.10	no						no	3 : Putative function from multiple computational evidences	2022-01-17	1	1492111	1492947	837
314	5	Bacillus thuringiensis C15	93120088	SEIU01_860019	CDS	automatic/finished		putative non-heme chloroperoxidase	1.11.1.10	no						no	3 : Putative function from multiple computational evidences	2022-01-17	1	3773110	3773946	837
314	5	Pseudomonas sp. B10	93124026	SEIT01_390031	CDS	automatic/finished		Arylesterase	3.1.1.2, 1.-.-.-	no						no		2022-01-17	3	2501574	2502392	819
314	5	Pseudomonas sp. B10	93124903	SEIT01_500010	CDS	automatic/finished	cpo	Non-heme chloroperoxidase	1.11.1.10	no						no		2022-01-17	-1	3441036	3441866	831
314	5	Pseudomonas sp. SWI36 SWI36_1	77225852	SEIS01_1380053	CDS	automatic/finished		Arylesterase	3.1.1.2, 1.-.-.-	no						no		2020-07-15	3	2770347	2771165	819
314	5	Pseudomonas sp. SWI36 SWI36_1	77227041	SEIS01_1600049	CDS	automatic/finished	cpo	Non-heme chloroperoxidase	1.11.1.10	no						no		2020-07-15	3	4001736	4002566	831
314	5	Pseudomonas sp. SWI36 SWI36_2	77217906	SEIQ01_20086	CDS	automatic/finished		Arylesterase	3.1.1.2, 1.-.-.-	no						no		2020-07-15	-1	344902	345720	819
314	5	Pseudomonas sp. SWI36 SWI36_2	77221808	SEIQ01_1660038	CDS	automatic/finished	cpo	Non-heme chloroperoxidase	1.11.1.10	no						no		2020-07-15	-1	4460137	4460967	831
316	5	Bacillus albus PFYN01	93134136	SEIR01_4560050	CDS	automatic/finished	cdr	CoA-disulfide reductase	1.8.1.14	no						no		2022-01-17	2	5976743	5978407	1665
316	5	Bacillus albus PFYN01	93134143	SEIR01_4560057	CDS	automatic/finished	yrkE	putative protein involved in sulfur metabolism (DsrE-like)		no	e : enzyme					no	3 : Putative function from multiple computational evidences	2022-01-17	2	5981714	5982193	480
316	5	Bacillus thuringiensis C15	93117732	SEIU01_520048	CDS	automatic/finished		CoA-disulfide reductase		no						no		2022-01-17	1	1512139	1513803	1665
316	5	Bacillus thuringiensis C15	93117739	SEIU01_520055	CDS	automatic/finished	yrkE	putative protein involved in sulfur metabolism (DsrE-like)		no	e : enzyme					no	3 : Putative function from multiple computational evidences	2022-01-17	3	1517094	1517573	480
316	5	Pseudomonas sp. B10	93121842	SEIT01_10148	CDS	automatic/finished	betA	choline dehydrogenase	1.1.99.1	no						no		2022-01-17	1	169267	170970	1704
316	5	Pseudomonas sp. B10	93123120	SEIT01_300053	CDS	automatic/finished	alkJ	Alcohol dehydrogenase [acceptor]	1.1.99.-	no						no		2022-01-17	-2	1541357	1543006	1650
316	5	Pseudomonas sp. B10	93126834	SEIT01_870155	CDS	automatic/finished	yjcS	putative alkyl/aryl-sulfatase YjcS	3.1.6.-	no						no	3 : Putative function from multiple computational evidences	2022-01-17	2	5510534	5512501	1968
316	5	Pseudomonas sp. B10	93127194	SEIT01_1010005	CDS	automatic/finished	betA	Oxygen-dependent choline dehydrogenase	1.1.99.1, 1.2.1.8	no						no		2022-01-17	-3	5886055	5887716	1662
316	5	Pseudomonas sp. SWI36 SWI36_1	77225118	SEIS01_1120120	CDS	automatic/finished	alkJ	Alcohol dehydrogenase [acceptor]	1.1.99.-	no						no		2020-07-15	3	2033475	2035121	1647
316	5	Pseudomonas sp. SWI36 SWI36_1	77226110	SEIS01_1420015	CDS	automatic/finished	betA	choline dehydrogenase	1.1.99.1	no						no		2020-07-15	2	3041627	3043324	1698
316	5	Pseudomonas sp. SWI36 SWI36_1	77227152	SEIS01_1630013	CDS	automatic/finished	yjcS	Putative alkyl/aryl-sulfatase YjcS	3.1.6.-	no						no	3 : Putative function from multiple computational evidences	2020-07-15	1	4149460	4151421	1962
316	5	Pseudomonas sp. SWI36 SWI36_2	77219454	SEIQ01_1120047	CDS	automatic/finished	alkJ	Alcohol dehydrogenase [acceptor]	1.1.99.-	no						no		2020-07-15	-1	2012143	2013789	1647
316	5	Pseudomonas sp. SWI36 SWI36_2	77219932	SEIQ01_1280015	CDS	automatic/finished	betA	choline dehydrogenase	1.1.99.1	no						no		2020-07-15	2	2491829	2493526	1698
316	5	Pseudomonas sp. SWI36 SWI36_2	77221079	SEIQ01_1490013	CDS	automatic/finished	yjcS	Putative alkyl/aryl-sulfatase YjcS	3.1.6.-	no						no	3 : Putative function from multiple computational evidences	2020-07-15	1	3701335	3703296	1962
3276	5	Bacillus albus PFYN01	93130706	SEIR01_1680021	CDS	automatic/finished	gabT	4-aminobutyrate aminotransferase	2.6.1.19	no	e : enzyme			16.8 : Protect ;	4590473, 12123465, 12354229, 15590624, 9723923, 19854901, 24529384	no	2a : Function from experimental evidences in other organisms	2022-01-17	-3	2826063	2827502	1440
3276	5	Bacillus thuringiensis C15	93119898	SEIU01_850037	CDS	automatic/finished	gabT	4-aminobutyrate aminotransferase	2.6.1.19	no	e : enzyme			16.8 : Protect ;	4590473, 12123465, 12354229, 15590624, 9723923, 19854901, 24529384	no	2a : Function from experimental evidences in other organisms	2022-01-17	3	3578394	3579758	1365
3276	5	Pseudomonas sp. B10	93122353	SEIT01_240004	CDS	automatic/finished	gabT	4-aminobutyrate aminotransferase GabT	2.6.1.11, 2.6.1.19, 2.6.1.48	no						no		2022-01-17	-2	698636	699928	1293
3276	5	Pseudomonas sp. B10	93125452	SEIT01_580021	CDS	automatic/finished	gabT	4-aminobutyrate aminotransferase GabT	2.6.1.11, 2.6.1.19, 2.6.1.48	no						no		2022-01-17	-2	4043078	4044355	1278
3276	5	Pseudomonas sp. SWI36 SWI36_1	77223614	SEIS01_110008	CDS	automatic/finished		Hydroxylysine kinase /5-phosphonooxy-L-lysine phospho-lyase		no						no		2020-07-15	-3	478136	481183	3048
3276	5	Pseudomonas sp. SWI36 SWI36_1	77225335	SEIS01_1300006	CDS	automatic/finished	gabT	4-aminobutyrate aminotransferase GabT	2.6.1.11, 2.6.1.19	no						no		2020-07-15	2	2237039	2238289	1251
3276	5	Pseudomonas sp. SWI36 SWI36_1	77226880	SEIS01_1570001	CDS	automatic/finished	gabT	4-aminobutyrate aminotransferase GabT	2.6.1.11, 2.6.1.19	no						no		2020-07-15	-3	3825977	3827254	1278
3276	5	Pseudomonas sp. SWI36 SWI36_2	77219854	SEIQ01_1260051	CDS	automatic/finished	gabT	4-aminobutyrate aminotransferase GabT	2.6.1.11, 2.6.1.19	no						no		2020-07-15	-1	2406940	2408190	1251
3276	5	Pseudomonas sp. SWI36 SWI36_2	77220075	SEIQ01_1310004	CDS	automatic/finished		Hydroxylysine kinase /5-phosphonooxy-L-lysine phospho-lyase		no						no		2020-07-15	2	2655575	2658622	3048
3276	5	Pseudomonas sp. SWI36 SWI36_2	77221449	SEIQ01_1560037	CDS	automatic/finished	gabT	4-aminobutyrate aminotransferase GabT	2.6.1.11, 2.6.1.19	no						no		2020-07-15	1	4084324	4085601	1278
331	5	Bacillus albus PFYN01	93132314	SEIR01_3340035	CDS	automatic/finished	trpA	tryptophan synthase (alpha subunit)	4.2.1.20	no	e : enzyme			16.2 : Construct biomass (Anabolism) ;	2422155, 9383185, 10714985, 12963367, 17114058, 17555270	no	2a : Function from experimental evidences in other organisms	2022-01-17	-3	4280223	4280999	777
331	5	Bacillus thuringiensis C15	93118096	SEIU01_540053	CDS	automatic/finished	trpA	tryptophan synthase (alpha subunit)	4.2.1.20	no	e : enzyme			16.2 : Construct biomass (Anabolism) ;	2422155, 9383185, 10714985, 12963367, 17114058, 17555270	no	2a : Function from experimental evidences in other organisms	2022-01-17	2	1837292	1838068	777
331	5	Pseudomonas sp. B10	93123662	SEIT01_350015	CDS	automatic/finished	trpA	Tryptophan synthase alpha chain	4.2.1.20	no						no		2022-01-17	-1	2134149	2134961	813
331	5	Pseudomonas sp. SWI36 SWI36_1	77225144	SEIS01_1120146	CDS	automatic/finished	trpA	tryptophan synthase subunit alpha	4.1.2.8, 4.2.1.20	no						no		2020-07-15	-3	2059772	2060581	810
331	5	Pseudomonas sp. SWI36 SWI36_2	77219428	SEIQ01_1120021	CDS	automatic/finished	trpA	tryptophan synthase subunit alpha	4.1.2.8, 4.2.1.20	no						no		2020-07-15	2	1986683	1987492	810
3318	5	Bacillus albus PFYN01	93129152	SEIR01_660006	CDS	automatic/finished	yxjC	putative acid metabolite permease		no	t : transporter			16.1 : Circulate ;	15849754, 16850406, 22720735	no	3 : Putative function from multiple computational evidences	2022-01-17	2	1403006	1404445	1440
3318	5	Bacillus thuringiensis C15	93120298	SEIU01_950013	CDS	automatic/finished	yxjC	putative acid metabolite permease		no	t : transporter			16.1 : Circulate ;	15849754, 16850406, 22720735	no	3 : Putative function from multiple computational evidences	2022-01-17	3	3995256	3996695	1440
3318	5	Pseudomonas sp. B10	93123526	SEIT01_330059	CDS	automatic/finished	yxjC	Uncharacterized transporter YxjC		no						no		2022-01-17	2	1992932	1994323	1392
3318	5	Pseudomonas sp. SWI36 SWI36_1	77226060	SEIS01_1410020	CDS	automatic/finished	yxjC	Uncharacterized transporter YxjC		no						no		2020-07-15	2	2990840	2992231	1392
3318	5	Pseudomonas sp. SWI36 SWI36_2	77220860	SEIQ01_1440074	CDS	automatic/finished	yxjC	Uncharacterized transporter YxjC		no						no		2020-07-15	3	3475077	3476468	1392
332	5	Bacillus albus PFYN01	93131163	SEIR01_2120015	CDS	automatic/finished	ohrR	transcriptional regulator sensing organic peroxides		no	r : regulator			16.3 : Control ;	11983871, 17502599, 18363800, 20094649, 21749987, 24184231	no	2a : Function from experimental evidences in other organisms	2022-01-17	2	3252233	3252685	453
332	5	Bacillus thuringiensis C15	93116650	SEIU01_130006	CDS	automatic/finished	ohrR	transcriptional regulator sensing organic peroxides		no	r : regulator			16.3 : Control ;	11983871, 17502599, 18363800, 20094649, 21749987, 24184231	no	2a : Function from experimental evidences in other organisms	2022-01-17	-2	478266	478718	453
332	5	Pseudomonas sp. B10	93126390	SEIT01_760121	CDS	automatic/finished	ohrR	Organic hydroperoxide resistance transcriptional regulator		no						no		2022-01-17	-3	5052130	5052594	465
332	5	Pseudomonas sp. B10	93126408	SEIT01_760139	CDS	automatic/finished	ohrR	Organic hydroperoxide resistance transcriptional regulator		no						no		2022-01-17	3	5067372	5067833	462
332	5	Pseudomonas sp. SWI36 SWI36_1	77224186	SEIS01_390011	CDS	automatic/finished	ohrR	Organic hydroperoxide resistance transcriptional regulator		no						no		2020-07-15	-2	1079595	1080050	456
332	5	Pseudomonas sp. SWI36 SWI36_2	77218582	SEIQ01_370011	CDS	automatic/finished	ohrR	Organic hydroperoxide resistance transcriptional regulator		no						no		2020-07-15	-1	1109185	1109640	456
333	5	Bacillus albus PFYN01	93131164	SEIR01_2120016	CDS	automatic/finished	ohrA	peroxiredoxin	1.11.1.24	no	e : enzyme			16.6 : Maintain ; 16.8 : Protect ;	11418552, 17502599, 21749987, 24184231	no	2a : Function from experimental evidences in other organisms	2022-01-17	1	3252688	3253104	417
333	5	Bacillus thuringiensis C15	93116649	SEIU01_130005	CDS	automatic/finished	ohrA	peroxiredoxin	1.11.1.24	no	e : enzyme			16.6 : Maintain ; 16.8 : Protect ;	11418552, 17502599, 21749987, 24184231	no	2a : Function from experimental evidences in other organisms	2022-01-17	-1	477847	478263	417
333	5	Pseudomonas sp. B10	93124783	SEIT01_480023	CDS	automatic/finished	ohr	Organic hydroperoxide resistance protein		no						no		2022-01-17	-1	3320322	3320741	420
333	5	Pseudomonas sp. B10	93124938	SEIT01_500045	CDS	automatic/finished	ohr	Organic hydroperoxide resistance protein		no						no		2022-01-17	2	3482885	3483337	453
333	5	Pseudomonas sp. B10	93125516	SEIT01_590034	CDS	automatic/finished	ohr	Organic hydroperoxide resistance protein		no						no		2022-01-17	-1	4114686	4115102	417
333	5	Pseudomonas sp. B10	93126388	SEIT01_760119	CDS	automatic/finished	ohr	Organic hydroperoxide resistance protein		no						no		2022-01-17	-1	5051436	5051855	420
333	5	Pseudomonas sp. SWI36 SWI36_1	77224185	SEIS01_390010	CDS	automatic/finished	ohr	Organic hydroperoxide resistance protein		no						no		2020-07-15	-1	1079026	1079454	429
333	5	Pseudomonas sp. SWI36 SWI36_2	77218581	SEIQ01_370010	CDS	automatic/finished	ohr	Organic hydroperoxide resistance protein		no						no		2020-07-15	-3	1108616	1109044	429
3342	5	Bacillus albus PFYN01	93133723	SEIR01_4440016	CDS	automatic/finished	crcBB	subunit of fluoride efflux transporter		no	t : transporter			16.1 : Circulate ; 16.4 : Excrete ;	8844142, 12904550, 15849754, 16850406, 22194412, 27824896, 35017489	no	2a : Function from experimental evidences in other organisms	2022-01-17	-3	5599635	5599991	357
3342	5	Bacillus albus PFYN01	93133724	SEIR01_4440017	CDS	automatic/finished	crcBB	subunit of fluoride efflux transporter		no	t : transporter			16.1 : Circulate ; 16.4 : Excrete ;	8844142, 12904550, 15849754, 16850406, 22194412, 27824896, 35017489	no	2a : Function from experimental evidences in other organisms	2022-01-17	-1	5599988	5600422	435
3342	5	Bacillus thuringiensis C15	93118679	SEIU01_630079	CDS	automatic/finished	crcBB	subunit of fluoride efflux transporter		no	t : transporter			16.1 : Circulate ; 16.4 : Excrete ;	8844142, 12904550, 15849754, 16850406, 22194412, 27824896, 35017489	no	2a : Function from experimental evidences in other organisms	2022-01-17	1	2395573	2396007	435
3342	5	Bacillus thuringiensis C15	93118680	SEIU01_630080	CDS	automatic/finished	crcBB	subunit of fluoride efflux transporter		no	t : transporter			16.1 : Circulate ; 16.4 : Excrete ;	8844142, 12904550, 15849754, 16850406, 22194412, 27824896, 35017489	no	2a : Function from experimental evidences in other organisms	2022-01-17	3	2396004	2396360	357
3342	5	Pseudomonas sp. B10	93127124	SEIT01_980111	CDS	automatic/finished	crcB	putative fluoride ion transporter CrcB		no						no	3 : Putative function from multiple computational evidences	2022-01-17	1	5825296	5825670	375
3342	5	Pseudomonas sp. SWI36 SWI36_1	77227021	SEIS01_1600029	CDS	automatic/finished	crcB	Putative fluoride ion transporter CrcB		no						no	3 : Putative function from multiple computational evidences	2020-07-15	-1	3978067	3978441	375
3342	5	Pseudomonas sp. SWI36 SWI36_2	77221828	SEIQ01_1660058	CDS	automatic/finished	crcB	Putative fluoride ion transporter CrcB		no						no	3 : Putative function from multiple computational evidences	2020-07-15	3	4484262	4484636	375
3359	5	Bacillus albus PFYN01	93130907	SEIR01_1810006	CDS	automatic/finished		protein of unknown function		no	u : unknown	1 : Unknown				no	5 : Unknown function	2022-01-17	-3	2986008	2986862	855
3359	5	Bacillus thuringiensis C15	93120072	SEIU01_860003	CDS	automatic/finished	phrA	Deoxyribodipyrimidine photo-lyase	4.1.99.3	no						no		2022-01-17	3	3757530	3758960	1431
3359	5	Pseudomonas sp. B10	93122821	SEIT01_270078	CDS	automatic/finished	phr	deoxyribodipyrimidine photolyase		no						no		2022-01-17	2	1178501	1179967	1467
3359	5	Pseudomonas sp. SWI36 SWI36_1	77226616	SEIS01_1500036	CDS	automatic/finished	phr	deoxyribodipyrimidine photolyase (photoreactivation)	4.1.99.3	no						no		2020-07-15	-3	3553970	3555412	1443
3359	5	Pseudomonas sp. SWI36 SWI36_2	77220688	SEIQ01_1410035	CDS	automatic/finished	phr	deoxyribodipyrimidine photolyase (photoreactivation)	4.1.99.3	no						no		2020-07-15	-3	3292955	3294397	1443
3379	5	Bacillus albus PFYN01	93132328	SEIR01_3340049	CDS	automatic/finished	yjcF	putative acetyltransferase	2.3.1.-	no	e : enzyme					no	3 : Putative function from multiple computational evidences	2022-01-17	1	4292542	4292964	423
3379	5	Bacillus albus PFYN01	93134304	SEIR01_4610013	CDS	automatic/finished	yybD	putative acetyltransferase		no	e : enzyme			16.8 : Protect ;	28032445	no	3 : Putative function from multiple computational evidences	2022-01-17	2	6122366	6122800	435
3379	5	Bacillus thuringiensis C15	93118081	SEIU01_540038	CDS	automatic/finished	yjcF	putative acetyltransferase	2.3.1.-	no	e : enzyme					no	3 : Putative function from multiple computational evidences	2022-01-17	-1	1825348	1825770	423
3379	5	Bacillus thuringiensis C15	93119127	SEIU01_690032	CDS	automatic/finished	yybD	putative acetyltransferase		no	e : enzyme			16.8 : Protect ;	28032445	no	3 : Putative function from multiple computational evidences	2022-01-17	-1	2829574	2830008	435
3379	5	Pseudomonas sp. B10	93127105	SEIT01_980092	CDS	automatic/finished		ElaA protein		no						no		2022-01-17	-3	5804839	5805264	426
3379	5	Pseudomonas sp. SWI36 SWI36_1	77227038	SEIS01_1600046	CDS	automatic/finished		GNAT family acetyltransferase YjcF		no						no		2020-07-15	1	3997555	3997983	429
3379	5	Pseudomonas sp. SWI36 SWI36_2	77221811	SEIQ01_1660041	CDS	automatic/finished		GNAT family acetyltransferase YjcF		no						no		2020-07-15	-2	4464720	4465148	429
34	5	Bacillus albus PFYN01	93130732	SEIR01_1680047	CDS	automatic/finished	purH	fused phosphoribosylaminoimidazole carboxy formyl formyltransferase; inosine-monophosphate cyclohydrolase	2.1.2.3, 3.5.4.10	no	e : enzyme			16.2 : Construct biomass (Anabolism) ;	12787499, 1937050, 9683488	no	2a : Function from experimental evidences in other organisms	2022-01-17	-3	2852334	2853869	1536
34	5	Bacillus thuringiensis C15	93119873	SEIU01_850012	CDS	automatic/finished	purH	fused phosphoribosylaminoimidazole carboxy formyl formyltransferase; inosine-monophosphate cyclohydrolase	2.1.2.3, 3.5.4.10	no	e : enzyme			16.2 : Construct biomass (Anabolism) ;	12787499, 1937050, 9683488	no	2a : Function from experimental evidences in other organisms	2022-01-17	2	3551795	3553330	1536
34	5	Pseudomonas sp. B10	93124650	SEIT01_460015	CDS	automatic/finished	purH	bifunctional AICAR transformylase/IMP cyclohydrolase	2.1.2.3, 3.5.4.10	no						no		2022-01-17	-2	3179522	3181129	1608
34	5	Pseudomonas sp. SWI36 SWI36_1	77225773	SEIS01_1370031	CDS	automatic/finished	purH	bifunctional AICAR transformylase/IMP cyclohydrolase	2.1.2.3, 3.5.4.10	no						no		2020-07-15	-3	2692262	2693869	1608
34	5	Pseudomonas sp. SWI36 SWI36_2	77220766	SEIQ01_1430027	CDS	automatic/finished	purH	bifunctional AICAR transformylase/IMP cyclohydrolase	2.1.2.3, 3.5.4.10	no						no		2020-07-15	3	3372459	3374066	1608
343	5	Bacillus albus PFYN01	93129245	SEIR01_690003	CDS	automatic/finished		Amidohydro_3 domain-containing protein		no						no		2022-01-17	-1	1487570	1489405	1836
343	5	Bacillus thuringiensis C15	93120084	SEIU01_860015	CDS	automatic/finished		Amidohydrolase		no						no		2022-01-17	-1	3768715	3770550	1836
343	5	Pseudomonas sp. B10	93124499	SEIT01_440006	CDS	automatic/finished		Amidohydrolase		no						no		2022-01-17	-3	3016363	3018201	1839
343	5	Pseudomonas sp. SWI36 SWI36_1	77225853	SEIS01_1380054	CDS	automatic/finished		Exoenzymes regulatory protein AepA precursor		no						no		2020-07-15	1	2771506	2773347	1842
343	5	Pseudomonas sp. SWI36 SWI36_2	77217905	SEIQ01_20085	CDS	automatic/finished		Exoenzymes regulatory protein AepA precursor		no						no		2020-07-15	-2	342720	344561	1842
3431	5	Bacillus albus PFYN01	93129026	SEIR01_570049	CDS	automatic/finished		NAD(P)-dependent alcohol dehydrogenase		no						no		2022-01-17	3	1293333	1294241	909
3431	5	Bacillus albus PFYN01	93131249	SEIR01_2210002	CDS	automatic/finished		NADPH:quinone reductase	1.6.5.5	no						no		2022-01-17	3	3327354	3328349	996
3431	5	Bacillus albus PFYN01	93131786	SEIR01_2630002	CDS	automatic/finished		NADPH:quinone reductase	1.6.5.5	no						no		2022-01-17	-3	3803802	3804800	999
3431	5	Bacillus thuringiensis C15	93117375	SEIU01_480049	CDS	automatic/finished		NADPH:quinone reductase	1.6.5.5	no						no		2022-01-17	-3	1173851	1174804	954
3431	5	Bacillus thuringiensis C15	93117377	SEIU01_480051	CDS	automatic/finished		NADPH:quinone reductase	1.6.5.5	no						no		2022-01-17	1	1176178	1177173	996
3431	5	Bacillus thuringiensis C15	93118204	SEIU01_560018	CDS	automatic/finished		NAD(P)-dependent alcohol dehydrogenase		no						no		2022-01-17	-2	1943523	1944431	909
3431	5	Bacillus thuringiensis C15	93119206	SEIU01_710010	CDS	automatic/finished		NADPH:quinone reductase	1.6.5.5	no						no		2022-01-17	-2	2900952	2901878	927
3431	5	Bacillus thuringiensis C15	93120229	SEIU01_920013	CDS	automatic/finished		NADPH:quinone reductase	1.6.5.5	no						no		2022-01-17	2	3917648	3918646	999
3431	5	Pseudomonas sp. B10	93123148	SEIT01_300081	CDS	automatic/finished		NADPH:quinone reductase	1.6.5.5	no						no		2022-01-17	2	1567340	1568335	996
3431	5	Pseudomonas sp. B10	93124790	SEIT01_480030	CDS	automatic/finished		NADPH:quinone reductase	1.6.5.5	no						no		2022-01-17	-3	3329578	3330576	999
3431	5	Pseudomonas sp. B10	93125379	SEIT01_560042	CDS	automatic/finished		NADPH:quinone reductase	1.6.5.5	no						no		2022-01-17	2	3965432	3966430	999
3431	5	Pseudomonas sp. B10	93126822	SEIT01_870143	CDS	automatic/finished		NADPH:quinone reductase	1.6.5.5	no						no		2022-01-17	2	5499659	5500669	1011
3431	5	Pseudomonas sp. SWI36 SWI36_1	77225189	SEIS01_1130025	CDS	automatic/finished		Bifunctional protein: zinc-containing alcohol dehydrogenase; quinone oxidoreductase ( NADPH:quinone reductase) ; Similar to arginate lyase	1.1.1.-	no						no		2020-07-15	-3	2093834	2094832	999
3431	5	Pseudomonas sp. SWI36 SWI36_1	77226963	SEIS01_1590008	CDS	automatic/finished		Alcohol dehydrogenase	1.1.1.1	no						no		2020-07-15	2	3910397	3911407	1011
3431	5	Pseudomonas sp. SWI36 SWI36_2	77219681	SEIQ01_1240024	CDS	automatic/finished		Bifunctional protein: zinc-containing alcohol dehydrogenase; quinone oxidoreductase ( NADPH:quinone reductase) ; Similar to arginate lyase	1.1.1.-	no						no		2020-07-15	-1	2227477	2228475	999
3431	5	Pseudomonas sp. SWI36 SWI36_2	77221327	SEIQ01_1550021	CDS	automatic/finished		Alcohol dehydrogenase	1.1.1.1	no						no		2020-07-15	2	3955130	3956140	1011
344	5	Bacillus albus PFYN01	93130225	SEIR01_1280003	CDS	automatic/finished		PhnB protein		no						no		2022-01-17	2	2395238	2395645	408
344	5	Bacillus thuringiensis C15	93119295	SEIU01_730013	CDS	automatic/finished		PhnB protein		no						no		2022-01-17	-2	2975073	2975480	408
344	5	Pseudomonas sp. B10	93124896	SEIT01_500003	CDS	automatic/finished		PhnB protein		no						no		2022-01-17	-2	3435065	3435568	504
344	5	Pseudomonas sp. SWI36 SWI36_1	77227783	SEIS01_1820014	CDS	automatic/finished		VOC family protein		no						no		2020-07-15	-1	4851163	4851642	480
344	5	Pseudomonas sp. SWI36 SWI36_2	77222569	SEIQ01_1880078	CDS	automatic/finished		VOC family protein		no						no		2020-07-15	1	5279398	5279877	480
350	5	Bacillus albus PFYN01	93130613	SEIR01_1570060	CDS	automatic/finished	yqhS	3-dehydroquinate dehydratase, type II	4.2.1.10	no	e : enzyme			16.2 : Construct biomass (Anabolism) ;	10870960, 19099550	no	2a : Function from experimental evidences in other organisms	2022-01-17	-1	2743283	2743723	441
350	5	Bacillus thuringiensis C15	93120357	SEIU01_960058	CDS	automatic/finished	yqhS	3-dehydroquinate dehydratase, type II	4.2.1.10	no	e : enzyme			16.2 : Construct biomass (Anabolism) ;	10870960, 19099550	no	2a : Function from experimental evidences in other organisms	2022-01-17	3	4040679	4041119	441
350	5	Pseudomonas sp. B10	93122037	SEIT01_20020	CDS	automatic/finished	aroQ	3-dehydroquinate dehydratase 2	4.2.1.10	no						no		2022-01-17	-1	374607	375056	450
350	5	Pseudomonas sp. B10	93124657	SEIT01_460022	CDS	automatic/finished	aroQ	3-dehydroquinate dehydratase 1	4.2.1.10	no						no		2022-01-17	-3	3186937	3187392	456
350	5	Pseudomonas sp. SWI36 SWI36_1	77225174	SEIS01_1130010	CDS	automatic/finished	aroQ	3-dehydroquinate dehydratase	4.2.1.10	no						no		2020-07-15	-2	2082216	2082653	438
350	5	Pseudomonas sp. SWI36 SWI36_1	77225474	SEIS01_1320026	CDS	automatic/finished	aroQ	3-dehydroquinate dehydratase 2	4.2.1.10	no						no		2020-07-15	3	2383572	2384021	450
350	5	Pseudomonas sp. SWI36 SWI36_1	77228455	SEIS01_2040036	CDS	automatic/finished	aroQ	3-dehydroquinate dehydratase 1	4.2.1.10	no						no		2020-07-15	-3	5572646	5573101	456
350	5	Pseudomonas sp. SWI36 SWI36_2	77217643	SEIQ01_10068	CDS	automatic/finished	aroQ	3-dehydroquinate dehydratase 2	4.2.1.10	no						no		2020-07-15	-1	80788	81237	450
350	5	Pseudomonas sp. SWI36 SWI36_2	77218534	SEIQ01_350040	CDS	automatic/finished	aroQ	3-dehydroquinate dehydratase 1	4.2.1.10	no						no		2020-07-15	3	1049034	1049489	456
350	5	Pseudomonas sp. SWI36 SWI36_2	77219666	SEIQ01_1240009	CDS	automatic/finished	aroQ	3-dehydroquinate dehydratase	4.2.1.10	no						no		2020-07-15	-3	2215859	2216296	438
351	5	Bacillus albus PFYN01	93128444	SEIR01_280009	CDS	automatic/finished	ywcH	putative monooxygenase	1.14.-.-	no	e : enzyme			16.8 : Protect ; 16.11 : Scavenge (Catabolism) ;	10913069, 15774866	no	3 : Putative function from multiple computational evidences	2022-01-17	-1	770810	771811	1002
351	5	Bacillus thuringiensis C15	93117467	SEIU01_490038	CDS	automatic/finished	ywcH	putative monooxygenase	1.14.-.-	no	e : enzyme			16.8 : Protect ; 16.11 : Scavenge (Catabolism) ;	10913069, 15774866	no	3 : Putative function from multiple computational evidences	2022-01-17	-2	1263183	1264184	1002
351	5	Pseudomonas sp. B10	93123668	SEIT01_350021	CDS	automatic/finished	yhbW	putative luciferase-like monooxygenase YhbW		no						no	3 : Putative function from multiple computational evidences	2022-01-17	-2	2138324	2139325	1002
351	5	Pseudomonas sp. SWI36 SWI36_1	77223210	SEIS01_10067	CDS	automatic/finished	yhbW	Luciferase-like monooxygenase		no						no		2020-07-15	1	70504	71484	981
351	5	Pseudomonas sp. SWI36 SWI36_1	77225150	SEIS01_1120152	CDS	automatic/finished		Coenzyme F420-dependent N5,N10-methylene tetrahydromethanopterin reductase and related flavin-dependent oxidoreductases		no						no		2020-07-15	-1	2063881	2064885	1005
351	5	Pseudomonas sp. SWI36 SWI36_2	77219422	SEIQ01_1120015	CDS	automatic/finished		Coenzyme F420-dependent N5,N10-methylene tetrahydromethanopterin reductase and related flavin-dependent oxidoreductases		no						no		2020-07-15	3	1982379	1983383	1005
351	5	Pseudomonas sp. SWI36 SWI36_2	77219630	SEIQ01_1130060	CDS	automatic/finished	yhbW	Luciferase-like monooxygenase		no						no		2020-07-15	-2	2185212	2186192	981
358	5	Bacillus albus PFYN01	93129830	SEIR01_1120004	CDS	automatic/finished	bcp	peroxiredoxin with versatile activity	1.11.1.24	no	e : enzyme			16.6 : Maintain ; 16.8 : Protect ;	10644761, 11349039, 12950915, 21910476, 26723255	no	2a : Function from experimental evidences in other organisms	2022-01-17	-2	2027608	2028063	456
358	5	Bacillus albus PFYN01	93129975	SEIR01_1120149	CDS	automatic/finished	ahpC	alkyl hydroperoxide reductase (small subunit)	1.11.1.5	no	e : enzyme			16.8 : Protect ;	8932315, 14766928, 26322180	no	2a : Function from experimental evidences in other organisms	2022-01-17	3	2173419	2173982	564
358	5	Bacillus albus PFYN01	93130625	SEIR01_1580002	CDS	automatic/finished	ahpC	alkyl hydroperoxide reductase (small subunit)	1.11.1.5	no	e : enzyme			16.8 : Protect ;	8932315, 14766928, 26322180	no	2a : Function from experimental evidences in other organisms	2022-01-17	-2	2748925	2749488	564
358	5	Bacillus thuringiensis C15	93119920	SEIU01_850059	CDS	automatic/finished	ahpC	alkyl hydroperoxide reductase (small subunit)	1.11.1.5	no	e : enzyme			16.8 : Protect ;	8932315, 14766928, 26322180	no	2a : Function from experimental evidences in other organisms	2022-01-17	-1	3603787	3604350	564
358	5	Bacillus thuringiensis C15	93120065	SEIU01_850204	CDS	automatic/finished	bcp	peroxiredoxin with versatile activity	1.11.1.24	no	e : enzyme			16.6 : Maintain ; 16.8 : Protect ;	10644761, 11349039, 12950915, 21910476, 26723255	no	2a : Function from experimental evidences in other organisms	2022-01-17	1	3752458	3752913	456
358	5	Pseudomonas sp. B10	93122012	SEIT01_10318	CDS	automatic/finished		thioredoxin-dependent peroxiredoxin	1.11.1.24	no						no		2022-01-17	-1	346209	346847	639
358	5	Pseudomonas sp. B10	93122276	SEIT01_130081	CDS	automatic/finished	bcp	Peroxiredoxin Bcp	1.11.1.24	no						no		2022-01-17	1	621028	621501	474
358	5	Pseudomonas sp. B10	93123483	SEIT01_330016	CDS	automatic/finished	ahpC	alkyl hydroperoxide reductase, AhpC component	1.11.1.26	no						no		2022-01-17	-2	1948886	1949449	564
358	5	Pseudomonas sp. B10	93123583	SEIT01_340030	CDS	automatic/finished	ahpC	Alkyl hydroperoxide reductase C	1.11.1.26	no						no		2022-01-17	2	2057522	2058124	603
358	5	Pseudomonas sp. B10	93124804	SEIT01_480044	CDS	automatic/finished		Thioredoxin peroxidase		no						no		2022-01-17	2	3345116	3345658	543
358	5	Pseudomonas sp. SWI36 SWI36_1	77223798	SEIS01_190007	CDS	automatic/finished	ahpC	alkyl hydroperoxide reductase, AhpC component	1.8.1.-	no						no		2020-07-15	2	669362	669925	564
358	5	Pseudomonas sp. SWI36 SWI36_1	77224796	SEIS01_900001	CDS	automatic/finished	ahpC	Alkyl hydroperoxide reductase C	1.11.1.26	no						no		2020-07-15	-3	1736525	1737127	603
358	5	Pseudomonas sp. SWI36 SWI36_1	77224944	SEIS01_1010054	CDS	automatic/finished	bcp	Peroxiredoxin Bcp	1.11.1.24	no						no		2020-07-15	2	1869800	1870273	474
358	5	Pseudomonas sp. SWI36 SWI36_1	77226777	SEIS01_1540022	CDS	automatic/finished		Alkyl hydroperoxide reductase subunit C-like protein		no						no		2020-07-15	1	3724210	3724848	639
358	5	Pseudomonas sp. SWI36 SWI36_2	77217681	SEIQ01_10106	CDS	automatic/finished	ahpC	alkyl hydroperoxide reductase, AhpC component	1.8.1.-	no						no		2020-07-15	3	115278	115841	564
358	5	Pseudomonas sp. SWI36 SWI36_2	77220451	SEIQ01_1360051	CDS	automatic/finished	ahpC	Alkyl hydroperoxide reductase C	1.11.1.26	no						no		2020-07-15	1	3051211	3051813	603
358	5	Pseudomonas sp. SWI36 SWI36_2	77221121	SEIQ01_1500019	CDS	automatic/finished		Alkyl hydroperoxide reductase subunit C-like protein		no						no		2020-07-15	-3	3749567	3750205	639
358	5	Pseudomonas sp. SWI36 SWI36_2	77221579	SEIQ01_1590054	CDS	automatic/finished	bcp	Peroxiredoxin Bcp	1.11.1.24	no						no		2020-07-15	2	4199462	4199935	474
36	5	Bacillus albus PFYN01	93131189	SEIR01_2120041	CDS	automatic/finished	rph	ribonuclease PH	2.7.7.56	no	e : enzyme			16.2 : Construct biomass (Anabolism) ; 16.6 : Maintain ;	1624460, 19153445	no	2a : Function from experimental evidences in other organisms	2022-01-17	-2	3275575	3276312	738
36	5	Bacillus thuringiensis C15	93120748	SEIU01_1070010	CDS	automatic/finished	rph	ribonuclease PH	2.7.7.56	no	e : enzyme			16.2 : Construct biomass (Anabolism) ; 16.6 : Maintain ;	1624460, 19153445	no	2a : Function from experimental evidences in other organisms	2022-01-17	-3	4394390	4395127	738
36	5	Pseudomonas sp. B10	93122728	SEIT01_260126	CDS	automatic/finished	rph	truncated RNase PH	2.7.7.56	no						no		2022-01-17	-1	1084359	1085081	723
36	5	Pseudomonas sp. SWI36 SWI36_1	77225810	SEIS01_1380011	CDS	automatic/finished	rph	truncated RNase PH	2.7.7.56	no						no		2020-07-15	2	2727530	2728252	723
36	5	Pseudomonas sp. SWI36 SWI36_2	77220906	SEIQ01_1450011	CDS	automatic/finished	rph	truncated RNase PH	2.7.7.56	no						no		2020-07-15	3	3518763	3519485	723
367	5	Bacillus albus PFYN01	93129713	SEIR01_1010036	CDS	automatic/finished	moaE	molybdopterin synthase (large subunit)	2.8.1.12	no	e : enzyme			16.2 : Construct biomass (Anabolism) ;	11135669, 18092812	no	2b : Function from indirect experimental evidences (e.g. phenotypes)	2022-01-17	-1	1917926	1918390	465
367	5	Bacillus albus PFYN01	93133598	SEIR01_4390024	CDS	automatic/finished	moaE	molybdopterin synthase (large subunit)	2.8.1.12	no	e : enzyme			16.2 : Construct biomass (Anabolism) ;	11135669, 18092812	no	2b : Function from indirect experimental evidences (e.g. phenotypes)	2022-01-17	-3	5479281	5479745	465
367	5	Bacillus albus PFYN01	93133614	SEIR01_4400010	CDS	automatic/finished	moaE	molybdopterin synthase (large subunit)	2.8.1.12	no	e : enzyme			16.2 : Construct biomass (Anabolism) ;	11135669, 18092812	no	2b : Function from indirect experimental evidences (e.g. phenotypes)	2022-01-17	2	5497199	5497669	471
367	5	Bacillus thuringiensis C15	93118402	SEIU01_590013	CDS	automatic/finished	moaE	molybdopterin synthase (large subunit)	2.8.1.12	no	e : enzyme			16.2 : Construct biomass (Anabolism) ;	11135669, 18092812	no	2b : Function from indirect experimental evidences (e.g. phenotypes)	2022-01-17	3	2120754	2121218	465
367	5	Bacillus thuringiensis C15	93119270	SEIU01_720032	CDS	automatic/finished	moaE	molybdopterin synthase (large subunit)	2.8.1.12	no	e : enzyme			16.2 : Construct biomass (Anabolism) ;	11135669, 18092812	no	2b : Function from indirect experimental evidences (e.g. phenotypes)	2022-01-17	-3	2954000	2954464	465
367	5	Bacillus thuringiensis C15	93119664	SEIU01_770029	CDS	automatic/finished	moaE	molybdopterin synthase (large subunit)	2.8.1.12	no	e : enzyme			16.2 : Construct biomass (Anabolism) ;	11135669, 18092812	no	2b : Function from indirect experimental evidences (e.g. phenotypes)	2022-01-17	-3	3322736	3323206	471
367	5	Pseudomonas sp. B10	93122566	SEIT01_250087	CDS	automatic/finished	moaE	molybdopterin synthase catalytic subunit	2.8.1.12	no						no		2022-01-17	3	926817	927269	453
367	5	Pseudomonas sp. B10	93125541	SEIT01_600020	CDS	automatic/finished	moaE	Molybdopterin synthase catalytic subunit	2.8.1.12	no						no		2022-01-17	1	4148287	4148748	462
367	5	Pseudomonas sp. SWI36 SWI36_1	77225994	SEIS01_1400007	CDS	automatic/finished	moaE	molybdopterin synthase catalytic subunit	2.8.1.12	no						no		2020-07-15	-1	2920261	2920707	447
367	5	Pseudomonas sp. SWI36 SWI36_2	77220354	SEIQ01_1350007	CDS	automatic/finished	moaE	molybdopterin synthase catalytic subunit	2.8.1.12	no						no		2020-07-15	-3	2951858	2952304	447
370	5	Bacillus albus PFYN01	93128945	SEIR01_550007	CDS	automatic/finished		D-lactate dehydrogenase (cytochrome)	1.1.2.4	no						no		2022-01-17	-1	1225295	1226686	1392
370	5	Bacillus albus PFYN01	93129561	SEIR01_900055	CDS	automatic/finished	glcD	glycolate oxidase subunit	1.1.99.14	no	e : enzyme			16.11 : Scavenge (Catabolism) ;	8606183, 25217009	no	2a : Function from experimental evidences in other organisms	2022-01-17	2	1782587	1783999	1413
370	5	Bacillus thuringiensis C15	93117121	SEIU01_460025	CDS	automatic/finished	glcD	glycolate oxidase subunit	1.1.99.14	no	e : enzyme			16.11 : Scavenge (Catabolism) ;	8606183, 25217009	no	2a : Function from experimental evidences in other organisms	2022-01-17	-2	944925	946337	1413
370	5	Bacillus thuringiensis C15	93120237	SEIU01_920021	CDS	automatic/finished		D-lactate dehydrogenase (cytochrome)	1.1.2.4	no						no		2022-01-17	-1	3923746	3925137	1392
370	5	Pseudomonas sp. B10	93126181	SEIT01_720006	CDS	automatic/finished	glcD	glycolate dehydrogenase, putative FAD-linked subunit	1.1.99.14	no						no		2022-01-17	1	4799530	4801029	1500
370	5	Pseudomonas sp. SWI36 SWI36_1	77223768	SEIS01_170008	CDS	automatic/finished	glcD	glycolate dehydrogenase, putative FAD-linked subunit	1.1.99.14	no						no		2020-07-15	-2	638598	640097	1500
370	5	Pseudomonas sp. SWI36 SWI36_2	77218240	SEIQ01_190008	CDS	automatic/finished	glcD	glycolate dehydrogenase, putative FAD-linked subunit	1.1.99.14	no						no		2020-07-15	3	709455	710954	1500
372	5	Bacillus albus PFYN01	93128413	SEIR01_260007	CDS	automatic/finished		putative quercetin 2,3-dioxygenase ZMO1337	1.13.11.24	no						no	3 : Putative function from multiple computational evidences	2022-01-17	2	740435	741133	699
372	5	Bacillus thuringiensis C15	93118643	SEIU01_630043	CDS	automatic/finished		putative quercetin 2,3-dioxygenase ZMO1337	1.13.11.24	no						no	3 : Putative function from multiple computational evidences	2022-01-17	-1	2360740	2361438	699
372	5	Pseudomonas sp. B10	93124510	SEIT01_440017	CDS	automatic/finished		putative quercetin 2,3-dioxygenase sll1773	1.13.11.24	no						no	3 : Putative function from multiple computational evidences	2022-01-17	1	3030211	3030933	723
372	5	Pseudomonas sp. B10	93127282	SEIT01_1090005	CDS	automatic/finished		putative quercetin 2,3-dioxygenase PA1210	1.13.11.24	no						no	3 : Putative function from multiple computational evidences	2022-01-17	1	5986468	5987163	696
372	5	Pseudomonas sp. SWI36 SWI36_1	77226534	SEIS01_1490084	CDS	automatic/finished		Pirin-related protein		no						no		2020-07-15	-3	3459440	3460138	699
372	5	Pseudomonas sp. SWI36 SWI36_2	77217775	SEIQ01_10200	CDS	automatic/finished		Pirin-related protein		no						no		2020-07-15	-1	200920	201618	699
379	5	Bacillus albus PFYN01	93129570	SEIR01_900064	CDS	automatic/finished	potC	spermidine preferential ABC transporter membrane subunit PotC	7.6.2.11	no						no		2022-01-17	-3	1792992	1793792	801
379	5	Bacillus thuringiensis C15	93117112	SEIU01_460016	CDS	automatic/finished	potC	spermidine preferential ABC transporter membrane subunit PotC	7.6.2.11	no						no		2022-01-17	3	935127	935927	801
379	5	Pseudomonas sp. B10	93121997	SEIT01_10303	CDS	automatic/finished	potI	putrescine ABC transporter membrane subunit PotI	7.6.2.11	no						no		2022-01-17	-2	329831	330721	891
379	5	Pseudomonas sp. B10	93124272	SEIT01_420051	CDS	automatic/finished	potC	spermidine preferential ABC transporter membrane subunit PotC	7.6.2.11	no						no		2022-01-17	2	2768171	2768959	789
379	5	Pseudomonas sp. B10	93125574	SEIT01_600053	CDS	automatic/finished	potI	putrescine ABC transporter membrane subunit PotI	7.6.2.11	no						no		2022-01-17	3	4175577	4176461	885
379	5	Pseudomonas sp. SWI36 SWI36_1	77224249	SEIS01_450001	CDS	automatic/finished	potI	putrescine ABC transporter membrane subunit PotI	7.6.2.-	no						no		2020-07-15	-3	1142480	1143373	894
379	5	Pseudomonas sp. SWI36 SWI36_2	77218634	SEIQ01_420001	CDS	automatic/finished	potI	putrescine ABC transporter membrane subunit PotI	7.6.2.-	no						no		2020-07-15	-3	1160093	1160986	894
38	5	Bacillus albus PFYN01	93132974	SEIR01_4230047	CDS	automatic/finished	clpQ	two-component ATP-dependent protease (N-terminal serine protease)	3.4.25.2	no	e : enzyme			16.3 : Control ; 16.6 : Maintain ;	11179218, 12032294, 12805205, 15983416, 17979190, 18689473, 21546913, 29629859	no	2a : Function from experimental evidences in other organisms	2022-01-17	1	4898482	4899024	543
38	5	Bacillus thuringiensis C15	93119514	SEIU01_740193	CDS	automatic/finished	clpQ	two-component ATP-dependent protease (N-terminal serine protease)	3.4.25.2	no	e : enzyme			16.3 : Control ; 16.6 : Maintain ;	11179218, 12032294, 12805205, 15983416, 17979190, 18689473, 21546913, 29629859	no	2a : Function from experimental evidences in other organisms	2022-01-17	1	3187663	3188205	543
38	5	Pseudomonas sp. B10	93123320	SEIT01_320051	CDS	automatic/finished	hslV	peptidase component of the HslVU protease		no						no		2022-01-17	-2	1755713	1756243	531
38	5	Pseudomonas sp. SWI36 SWI36_1	77228366	SEIS01_2000022	CDS	automatic/finished	hslV	peptidase component of the HslVU protease	3.4.21.-	no						no		2020-07-15	-1	5468794	5469324	531
38	5	Pseudomonas sp. SWI36 SWI36_2	77220039	SEIQ01_1300022	CDS	automatic/finished	hslV	peptidase component of the HslVU protease	3.4.21.-	no						no		2020-07-15	-2	2614593	2615123	531
380	5	Bacillus albus PFYN01	93129571	SEIR01_900065	CDS	automatic/finished	potB	spermidine preferential ABC transporter membrane subunit PotB	7.6.2.11	no						no		2022-01-17	-3	1793799	1794647	849
380	5	Bacillus thuringiensis C15	93117111	SEIU01_460015	CDS	automatic/finished	potB	spermidine preferential ABC transporter membrane subunit PotB	7.6.2.11	no						no		2022-01-17	3	934272	935120	849
380	5	Pseudomonas sp. B10	93121998	SEIT01_10304	CDS	automatic/finished	potH	putrescine ABC transporter membrane subunit PotH	7.6.2.11	no						no		2022-01-17	-3	330718	331638	921
380	5	Pseudomonas sp. B10	93124271	SEIT01_420050	CDS	automatic/finished	potB	Spermidine/putrescine transport system permease protein PotB		no						no		2022-01-17	3	2767257	2768174	918
380	5	Pseudomonas sp. B10	93125573	SEIT01_600052	CDS	automatic/finished	potH	putrescine ABC transporter membrane subunit PotH	7.6.2.11	no						no		2022-01-17	1	4174666	4175580	915
380	5	Pseudomonas sp. SWI36 SWI36_1	77224250	SEIS01_450002	CDS	automatic/finished	potH	putrescine ABC transporter membrane subunit PotH	7.6.2.-	no						no		2020-07-15	-1	1143370	1144290	921
380	5	Pseudomonas sp. SWI36 SWI36_2	77218635	SEIQ01_420002	CDS	automatic/finished	potH	putrescine ABC transporter membrane subunit PotH	7.6.2.-	no						no		2020-07-15	-1	1160983	1161903	921
38165	5	Bacillus albus PFYN01	93133066	SEIR01_4240035	CDS	automatic/finished	trmK	tRNA (adenine(22)-N(1))-methyltransferase	2.1.1.217	no	e : enzyme			16.2 : Construct biomass (Anabolism) ;	18420655, 27098549	no	2a : Function from experimental evidences in other organisms	2022-01-17	-1	4991159	4991866	708
38165	5	Bacillus thuringiensis C15	93118010	SEIU01_530052	CDS	automatic/finished	trmK	tRNA (adenine(22)-N(1))-methyltransferase	2.1.1.217	no	e : enzyme			16.2 : Construct biomass (Anabolism) ;	18420655, 27098549	no	2a : Function from experimental evidences in other organisms	2022-01-17	1	1761385	1762092	708
38165	5	Pseudomonas sp. B10	93126732	SEIT01_870053	CDS	automatic/finished	trmK	tRNA (adenine(22)-N(1))-methyltransferase	2.1.1.217	no						no		2022-01-17	-1	5407143	5407817	675
38165	5	Pseudomonas sp. SWI36 SWI36_1	77227745	SEIS01_1810003	CDS	automatic/finished		tRNA (Adenine22-N1)-methyltransferase		no						no		2020-07-15	3	4811028	4811720	693
38165	5	Pseudomonas sp. SWI36 SWI36_2	77222064	SEIQ01_1730025	CDS	automatic/finished		tRNA (Adenine22-N1)-methyltransferase		no						no		2020-07-15	-2	4735437	4736129	693
3846	5	Bacillus albus PFYN01	93129515	SEIR01_900009	CDS	automatic/finished		6-pyruvoyltetrahydropterin/6-carboxytetrahydropterin synthase	4.1.2.50, 4.2.3.12	no						no		2022-01-17	-1	1739546	1740037	492
3846	5	Bacillus thuringiensis C15	93117166	SEIU01_460070	CDS	automatic/finished		6-pyruvoyltetrahydropterin/6-carboxytetrahydropterin synthase	4.1.2.50, 4.2.3.12	no						no		2022-01-17	2	988895	989386	492
3846	5	Pseudomonas sp. B10	93127466	SEIT01_1150006	CDS	automatic/finished	queD	6-carboxy-5,6,7,8-tetrahydropterin synthase	4.1.2.50	no						no		2022-01-17	1	6187699	6188055	357
3846	5	Pseudomonas sp. SWI36 SWI36_1	77223442	SEIS01_20047	CDS	automatic/finished	queD	6-carboxy-5,6,7,8-tetrahydropterin synthase	4.1.2.50	no						no		2020-07-15	-3	295469	295825	357
3846	5	Pseudomonas sp. SWI36 SWI36_2	77217579	SEIQ01_10004	CDS	automatic/finished	queD	6-carboxy-5,6,7,8-tetrahydropterin synthase	4.1.2.50	no						no		2020-07-15	-3	5210	5566	357
387	5	Bacillus albus PFYN01	93133625	SEIR01_4400021	CDS	automatic/finished	nasE	assimilatory nitrite reductase subunit	1.7.1.4	no	e : enzyme			16.2 : Construct biomass (Anabolism) ; 16.10 : Respire ;	10217486, 15028686, 9765565, 22103536, 34898263	no	2a : Function from experimental evidences in other organisms	2022-01-17	-3	5504286	5504603	318
387	5	Bacillus thuringiensis C15	93119654	SEIU01_770019	CDS	automatic/finished	nasE	assimilatory nitrite reductase subunit	1.7.1.4	no	e : enzyme			16.2 : Construct biomass (Anabolism) ; 16.10 : Respire ;	10217486, 15028686, 9765565, 22103536, 34898263	no	2a : Function from experimental evidences in other organisms	2022-01-17	1	3315751	3316068	318
387	5	Pseudomonas sp. B10	93126497	SEIT01_780021	CDS	automatic/finished		nitrite reductase (NADH) small subunit	1.7.1.15	no						no		2022-01-17	-2	5162627	5162944	318
387	5	Pseudomonas sp. SWI36 SWI36_1	77226085	SEIS01_1410045	CDS	automatic/finished		(2Fe-2S)-binding protein		no						no		2020-07-15	-3	3016424	3016756	333
387	5	Pseudomonas sp. SWI36 SWI36_2	77220885	SEIQ01_1440099	CDS	automatic/finished		(2Fe-2S)-binding protein		no						no		2020-07-15	-2	3500661	3500993	333
390	5	Bacillus albus PFYN01	93134444	SEIR01_4670007	CDS	automatic/finished	glgP	glycogen phosphorylase	2.4.1.1	no	e : enzyme			16.11 : Scavenge (Catabolism) ; 16.14 : Store ;	8145641, 9244254, 15272305	no	2a : Function from experimental evidences in other organisms	2022-01-17	1	6241285	6243693	2409
390	5	Bacillus thuringiensis C15	93117319	SEIU01_470105	CDS	automatic/finished	glgP	glycogen phosphorylase	2.4.1.1	no	e : enzyme			16.11 : Scavenge (Catabolism) ; 16.14 : Store ;	8145641, 9244254, 15272305	no	2a : Function from experimental evidences in other organisms	2022-01-17	-2	1112151	1114559	2409
390	5	Pseudomonas sp. B10	93123271	SEIT01_320002	CDS	automatic/finished	glgP	Glycogen phosphorylase	2.4.1.1	no						no		2022-01-17	1	1699120	1701570	2451
390	5	Pseudomonas sp. SWI36 SWI36_1	77228612	SEIS01_2110008	CDS	automatic/finished	glgP	glycogen phosphorylase		no						no		2020-07-15	-2	5742033	5744483	2451
390	5	Pseudomonas sp. SWI36 SWI36_2	77223074	SEIQ01_2080008	CDS	automatic/finished	glgP	glycogen phosphorylase		no						no		2020-07-15	-3	5782388	5784838	2451
393	5	Bacillus albus PFYN01	93131578	SEIR01_2370003	CDS	automatic/finished	proP	putative proline/betaine transporter		no						no	3 : Putative function from multiple computational evidences	2022-01-17	3	3618165	3619622	1458
393	5	Bacillus albus PFYN01	93133676	SEIR01_4420024	CDS	automatic/finished	kgtP	alpha-ketoglutarate:H(+) symporter		no						no		2022-01-17	2	5558807	5560129	1323
393	5	Bacillus thuringiensis C15	93117899	SEIU01_520215	CDS	automatic/finished	kgtP	alpha-ketoglutarate:H(+) symporter		no						no		2022-01-17	-2	1656891	1658024	1134
393	5	Bacillus thuringiensis C15	93119780	SEIU01_820006	CDS	automatic/finished	proP	putative proline/betaine transporter		no						no	3 : Putative function from multiple computational evidences	2022-01-17	-1	3460531	3461988	1458
393	5	Pseudomonas sp. B10	93122856	SEIT01_270113	CDS	automatic/finished		MFS transporter		no						no		2022-01-17	-2	1211717	1213069	1353
393	5	Pseudomonas sp. B10	93123119	SEIT01_300052	CDS	automatic/finished		MFS transporter		no						no		2022-01-17	-2	1539653	1541275	1623
393	5	Pseudomonas sp. B10	93123178	SEIT01_310003	CDS	automatic/finished		MFS transporter, MHS family, shikimate and dehydroshikimate transport protein		no						no		2022-01-17	1	1596274	1597572	1299
393	5	Pseudomonas sp. B10	93123182	SEIT01_310007	CDS	automatic/finished		MFS transporter, MHS family, shikimate and dehydroshikimate transport protein		no						no		2022-01-17	2	1600343	1601653	1311
393	5	Pseudomonas sp. B10	93123227	SEIT01_310052	CDS	automatic/finished	citA	Citrate-proton symporter		no						no		2022-01-17	-2	1655516	1656808	1293
393	5	Pseudomonas sp. B10	93123647	SEIT01_340094	CDS	automatic/finished	kgtP	alpha-ketoglutarate:H(+) symporter		no						no		2022-01-17	-2	2119427	2120746	1320
393	5	Pseudomonas sp. B10	93124712	SEIT01_470017	CDS	automatic/finished	kgtP	alpha-ketoglutarate:H(+) symporter		no						no		2022-01-17	-2	3246974	3248269	1296
393	5	Pseudomonas sp. B10	93125023	SEIT01_520015	CDS	automatic/finished	yhjE	putative transporter YhjE		no						no	3 : Putative function from multiple computational evidences	2022-01-17	-3	3565726	3567042	1317
393	5	Pseudomonas sp. B10	93125167	SEIT01_540045	CDS	automatic/finished		MFS transporter		no						no		2022-01-17	-2	3715574	3716872	1299
393	5	Pseudomonas sp. B10	93126021	SEIT01_680002	CDS	automatic/finished	citH	Citrate-proton symporter		no						no		2022-01-17	-3	4638271	4639563	1293
393	5	Pseudomonas sp. B10	93126744	SEIT01_870065	CDS	automatic/finished		putative MFS family arabinose efflux permease		no						no	3 : Putative function from multiple computational evidences	2022-01-17	3	5418816	5420492	1677
393	5	Pseudomonas sp. B10	93127216	SEIT01_1030005	CDS	automatic/finished		MFS transporter, MHS family, proline/betaine transporter		no						no		2022-01-17	3	5912526	5913836	1311
393	5	Pseudomonas sp. SWI36 SWI36_1	77223502	SEIS01_40013	CDS	automatic/finished	kgtP	alpha-ketoglutarate:H(+) symporter		no						no		2020-07-15	1	364993	366312	1320
393	5	Pseudomonas sp. SWI36 SWI36_1	77223656	SEIS01_130025	CDS	automatic/finished		Putative MFS family arabinose efflux permease		no						no	3 : Putative function from multiple computational evidences	2020-07-15	1	527509	528810	1302
393	5	Pseudomonas sp. SWI36 SWI36_1	77225119	SEIS01_1120121	CDS	automatic/finished		Permeases of the major facilitator superfamily		no						no		2020-07-15	1	2035219	2036838	1620
393	5	Pseudomonas sp. SWI36 SWI36_1	77225400	SEIS01_1310014	CDS	automatic/finished	proP	osmolyte:H(+) symporter ProP		no						no		2020-07-15	-3	2312246	2313748	1503
393	5	Pseudomonas sp. SWI36 SWI36_1	77226383	SEIS01_1470028	CDS	automatic/finished	kgtP	alpha-ketoglutarate:H(+) symporter		no						no		2020-07-15	2	3310676	3311965	1290
393	5	Pseudomonas sp. SWI36 SWI36_1	77226511	SEIS01_1490061	CDS	automatic/finished		MFS transporter		no						no		2020-07-15	1	3430504	3431808	1305
393	5	Pseudomonas sp. SWI36 SWI36_1	77226525	SEIS01_1490075	CDS	automatic/finished		MFS transporter		no						no		2020-07-15	-2	3446373	3447746	1374
393	5	Pseudomonas sp. SWI36 SWI36_1	77226539	SEIS01_1490089	CDS	automatic/finished		MFS transporter		no						no		2020-07-15	3	3469590	3471266	1677
393	5	Pseudomonas sp. SWI36 SWI36_1	77228049	SEIS01_1900009	CDS	automatic/finished		MFS transporter		no						no		2020-07-15	3	5138022	5139311	1290
393	5	Pseudomonas sp. SWI36 SWI36_1	77228537	SEIS01_2060016	CDS	automatic/finished	yhjE	putative transporter YhjE		no						no	3 : Putative function from multiple computational evidences	2020-07-15	-3	5659157	5660455	1299
393	5	Pseudomonas sp. SWI36 SWI36_1	77228675	SEIS01_2140014	CDS	automatic/finished		major facilitator family transporter		no						no		2020-07-15	-2	5800173	5801498	1326
393	5	Pseudomonas sp. SWI36 SWI36_2	77217752	SEIQ01_10177	CDS	automatic/finished		MFS transporter		no						no		2020-07-15	3	171984	173288	1305
393	5	Pseudomonas sp. SWI36 SWI36_2	77217766	SEIQ01_10191	CDS	automatic/finished		MFS transporter		no						no		2020-07-15	-3	187853	189226	1374
393	5	Pseudomonas sp. SWI36 SWI36_2	77217780	SEIQ01_10205	CDS	automatic/finished		MFS transporter		no						no		2020-07-15	2	211070	212746	1677
393	5	Pseudomonas sp. SWI36 SWI36_2	77217937	SEIQ01_40006	CDS	automatic/finished		major facilitator family transporter		no						no		2020-07-15	2	377516	378841	1326
393	5	Pseudomonas sp. SWI36 SWI36_2	77217975	SEIQ01_60002	CDS	automatic/finished	kgtP	alpha-ketoglutarate:H(+) symporter		no						no		2020-07-15	-2	407436	408755	1320
393	5	Pseudomonas sp. SWI36 SWI36_2	77218328	SEIQ01_240024	CDS	automatic/finished	kgtP	alpha-ketoglutarate:H(+) symporter		no						no		2020-07-15	-1	800812	802101	1290
393	5	Pseudomonas sp. SWI36 SWI36_2	77218733	SEIQ01_460061	CDS	automatic/finished		Putative MFS family arabinose efflux permease		no						no	3 : Putative function from multiple computational evidences	2020-07-15	-2	1256916	1258217	1302
393	5	Pseudomonas sp. SWI36 SWI36_2	77219453	SEIQ01_1120046	CDS	automatic/finished		Permeases of the major facilitator superfamily		no						no		2020-07-15	-2	2010426	2012045	1620
393	5	Pseudomonas sp. SWI36 SWI36_2	77222404	SEIQ01_1840009	CDS	automatic/finished		MFS transporter		no						no		2020-07-15	2	5103293	5104582	1290
393	5	Pseudomonas sp. SWI36 SWI36_2	77222886	SEIQ01_1990085	CDS	automatic/finished	proP	osmolyte:H(+) symporter ProP		no						no		2020-07-15	-2	5588364	5589866	1503
393	5	Pseudomonas sp. SWI36 SWI36_2	77223003	SEIQ01_2040001	CDS	automatic/finished	yhjE	putative transporter YhjE		no						no	3 : Putative function from multiple computational evidences	2020-07-15	2	5698916	5700214	1299
395	5	Bacillus albus PFYN01	93130889	SEIR01_1790070	CDS	automatic/finished	radA	DNA repair protein	3.6.4.-	no	e : enzyme			16.6 : Maintain ;	10931349, 11810266, 15317759, 25616256, 31350886, 34880841	no	2a : Function from experimental evidences in other organisms	2022-01-17	-3	2970240	2971616	1377
395	5	Bacillus thuringiensis C15	93118385	SEIU01_580070	CDS	automatic/finished	radA	DNA repair protein	3.6.4.-	no	e : enzyme			16.6 : Maintain ;	10931349, 11810266, 15317759, 25616256, 31350886, 34880841	no	2a : Function from experimental evidences in other organisms	2022-01-17	-3	2099330	2100706	1377
395	5	Pseudomonas sp. B10	93122056	SEIT01_20039	CDS	automatic/finished	radA	DNA recombination protein		no						no		2022-01-17	1	391498	392865	1368
395	5	Pseudomonas sp. SWI36 SWI36_1	77225590	SEIS01_1340025	CDS	automatic/finished	radA	DNA recombination protein		no						no		2020-07-15	-2	2504763	2506133	1371
395	5	Pseudomonas sp. SWI36 SWI36_2	77219994	SEIQ01_1290033	CDS	automatic/finished	radA	DNA recombination protein		no						no		2020-07-15	1	2570755	2572125	1371
424	5	Bacillus albus PFYN01	93133680	SEIR01_4430002	CDS	automatic/finished	rarA	DNA-dependent ATPase modulator of replication restart		no	e : enzyme			16.3 : Control ; 16.11 : Scavenge (Catabolism) ;	15743409, 17641684, 21170359, 29947798, 30760776, 30806035, 30954900, 30971308, 32117122	no	2a : Function from experimental evidences in other organisms	2022-01-17	-1	5561516	5562802	1287
424	5	Bacillus thuringiensis C15	93116716	SEIU01_130072	CDS	automatic/finished	rarA	DNA-dependent ATPase modulator of replication restart		no	e : enzyme			16.3 : Control ; 16.11 : Scavenge (Catabolism) ;	15743409, 17641684, 21170359, 29947798, 30760776, 30806035, 30954900, 30971308, 32117122	no	2a : Function from experimental evidences in other organisms	2022-01-17	-2	547560	548846	1287
424	5	Pseudomonas sp. B10	93127123	SEIT01_980110	CDS	automatic/finished	rarA	replication-associated recombination protein A		no						no		2022-01-17	2	5823974	5825296	1323
424	5	Pseudomonas sp. SWI36 SWI36_1	77227022	SEIS01_1600030	CDS	automatic/finished	rarA	recombination factor		no						no		2020-07-15	-2	3978438	3979763	1326
424	5	Pseudomonas sp. SWI36 SWI36_2	77221827	SEIQ01_1660057	CDS	automatic/finished	rarA	recombination factor		no						no		2020-07-15	1	4482940	4484265	1326
428	5	Bacillus albus PFYN01	93134317	SEIR01_4610026	CDS	automatic/finished	mnaT	L-amino acid N-acyltransferase MnaT	2.3.1.-	no						no		2022-01-17	-3	6132036	6132548	513
428	5	Bacillus thuringiensis C15	93119114	SEIU01_690019	CDS	automatic/finished	mnaT	L-amino acid N-acyltransferase MnaT	2.3.1.-	no						no		2022-01-17	2	2820476	2820988	513
428	5	Pseudomonas sp. B10	93124131	SEIT01_400054	CDS	automatic/finished	mnaT	L-amino acid N-acyltransferase		no						no		2022-01-17	-2	2609423	2609956	534
428	5	Pseudomonas sp. SWI36 SWI36_1	77225746	SEIS01_1370004	CDS	automatic/finished	mnaT	L-amino acid N-acyltransferase		no						no		2020-07-15	-1	2662789	2663304	516
428	5	Pseudomonas sp. SWI36 SWI36_2	77218630	SEIQ01_410007	CDS	automatic/finished	mnaT	L-amino acid N-acyltransferase		no						no		2020-07-15	1	1156204	1156719	516
4319	5	Bacillus albus PFYN01	93129942	SEIR01_1120116	CDS	automatic/finished	arcC	Carbamate kinase	2.7.2.2	no						no		2022-01-17	-1	2141603	2142565	963
4319	5	Bacillus thuringiensis C15	93119955	SEIU01_850094	CDS	automatic/finished	arcC	Carbamate kinase	2.7.2.2	no						no		2022-01-17	3	3635217	3636179	963
4319	5	Pseudomonas sp. B10	93122995	SEIT01_290025	CDS	automatic/finished	ybcF	putative carbamate kinase		no						no	3 : Putative function from multiple computational evidences	2022-01-17	2	1393745	1394674	930
4319	5	Pseudomonas sp. SWI36 SWI36_1	77227487	SEIS01_1720013	CDS	automatic/finished	ybcF	putative carbamate kinase		no						no	3 : Putative function from multiple computational evidences	2020-07-15	-1	4539370	4540299	930
4319	5	Pseudomonas sp. SWI36 SWI36_2	77221933	SEIQ01_1690013	CDS	automatic/finished	ybcF	putative carbamate kinase		no						no	3 : Putative function from multiple computational evidences	2020-07-15	-1	4595392	4596321	930
442	5	Bacillus albus PFYN01	93134440	SEIR01_4670003	CDS	automatic/finished	glgB	1,4-alpha-glucan branching enzyme	2.4.1.18	no	e : enzyme			16.14 : Store ;	1296817, 15272305, 8145641	no	2a : Function from experimental evidences in other organisms	2022-01-17	1	6235654	6237591	1938
442	5	Bacillus thuringiensis C15	93117323	SEIU01_470109	CDS	automatic/finished	glgB	1,4-alpha-glucan branching enzyme	2.4.1.18	no	e : enzyme			16.14 : Store ;	1296817, 15272305, 8145641	no	2a : Function from experimental evidences in other organisms	2022-01-17	-2	1118253	1120190	1938
442	5	Pseudomonas sp. B10	93127203	SEIT01_1020002	CDS	automatic/finished	glgB	1,4-alpha-glucan branching enzyme	2.4.1.18	no						no		2022-01-17	-2	5896433	5898664	2232
442	5	Pseudomonas sp. SWI36 SWI36_1	77227075	SEIS01_1600083	CDS	automatic/finished	glgB	1,4-alpha-glucan branching enzyme	2.4.1.18	no						no		2020-07-15	-1	4043116	4045326	2211
442	5	Pseudomonas sp. SWI36 SWI36_2	77221774	SEIQ01_1660004	CDS	automatic/finished	glgB	1,4-alpha-glucan branching enzyme	2.4.1.18	no						no		2020-07-15	3	4417377	4419587	2211
443	5	Bacillus albus PFYN01	93129937	SEIR01_1120111	CDS	automatic/finished	yugT	putative oligo-1,6-glucosidase	3.2.1.10	no	e : enzyme			16.11 : Scavenge (Catabolism) ;	1761534	no	3 : Putative function from multiple computational evidences	2022-01-17	-2	2137393	2139057	1665
443	5	Bacillus albus PFYN01	93132250	SEIR01_3230037	CDS	automatic/finished	treA	trehalose-6-phosphate hydrolase	3.2.1.93	no	e : enzyme			16.8 : Protect ;	7651129, 7751281, 8755887, 8917076, 9701821, 26894535	no	2a : Function from experimental evidences in other organisms	2022-01-17	-2	4213051	4214712	1662
443	5	Bacillus albus PFYN01	93133883	SEIR01_4470020	CDS	automatic/finished	mdxL	oligo-1,4-1,6-alpha-glucosidase (sucrase-maltase-isomaltase)	3.2.1.10	no	e : enzyme			16.11 : Scavenge (Catabolism) ;	814118, 1670768, 9573215, 10229946	no	2a : Function from experimental evidences in other organisms	2022-01-17	-3	5752548	5754242	1695
443	5	Bacillus thuringiensis C15	93119324	SEIU01_740003	CDS	automatic/finished	mdxL	oligo-1,4-1,6-alpha-glucosidase (sucrase-maltase-isomaltase)	3.2.1.10	no	e : enzyme			16.11 : Scavenge (Catabolism) ;	814118, 1670768, 9573215, 10229946	no	2a : Function from experimental evidences in other organisms	2022-01-17	3	3002796	3004490	1695
443	5	Bacillus thuringiensis C15	93119959	SEIU01_850098	CDS	automatic/finished	yugT	putative oligo-1,6-glucosidase	3.2.1.10	no	e : enzyme			16.11 : Scavenge (Catabolism) ;	1761534	no	3 : Putative function from multiple computational evidences	2022-01-17	1	3639613	3641277	1665
443	5	Bacillus thuringiensis C15	93121494	SEIU01_1290050	CDS	automatic/finished	treA	trehalose-6-phosphate hydrolase	3.2.1.93	no	e : enzyme			16.8 : Protect ;	7651129, 7751281, 8755887, 8917076, 9701821, 26894535	no	2a : Function from experimental evidences in other organisms	2022-01-17	-2	5075985	5077646	1662
443	5	Pseudomonas sp. B10	93127204	SEIT01_1020003	CDS	automatic/finished		maltose alpha-D-glucosyltransferase / alpha-amylase	3.2.1.1, 5.4.99.16	no						no		2022-01-17	-3	5898667	5902008	3342
443	5	Pseudomonas sp. SWI36 SWI36_1	77227076	SEIS01_1600084	CDS	automatic/finished		Trehalose synthase	5.4.99.16	no						no		2020-07-15	-2	4045323	4048643	3321
443	5	Pseudomonas sp. SWI36 SWI36_2	77221773	SEIQ01_1660003	CDS	automatic/finished		Trehalose synthase	5.4.99.16	no						no		2020-07-15	1	4414060	4417380	3321
456	5	Bacillus albus PFYN01	93133510	SEIR01_4360011	CDS	automatic/finished	proA	gamma-glutamyl phosphate reductase	1.2.1.41	no	e : enzyme			16.2 : Construct biomass (Anabolism) ;	16958849, 8083159, 21784929, 22720735	no	2a : Function from experimental evidences in other organisms	2022-01-17	1	5391100	5392347	1248
456	5	Bacillus thuringiensis C15	93118479	SEIU01_600039	CDS	automatic/finished	proA	gamma-glutamyl phosphate reductase	1.2.1.41	no	e : enzyme			16.2 : Construct biomass (Anabolism) ;	16958849, 8083159, 21784929, 22720735	no	2a : Function from experimental evidences in other organisms	2022-01-17	-3	2203517	2204764	1248
456	5	Pseudomonas sp. B10	93125813	SEIT01_650055	CDS	automatic/finished	proA	Gamma-glutamyl phosphate reductase	1.2.1.41	no						no		2022-01-17	-1	4419129	4420400	1272
456	5	Pseudomonas sp. SWI36 SWI36_1	77225785	SEIS01_1370043	CDS	automatic/finished	proA	Gamma-glutamyl phosphate reductase	1.2.1.41	no						no		2020-07-15	3	2702559	2703830	1272
456	5	Pseudomonas sp. SWI36 SWI36_2	77220754	SEIQ01_1430015	CDS	automatic/finished	proA	Gamma-glutamyl phosphate reductase	1.2.1.41	no						no		2020-07-15	-3	3362498	3363769	1272
458	5	Bacillus albus PFYN01	93128880	SEIR01_490010	CDS	automatic/finished		Glutaredoxin domain-containing protein		no						no		2022-01-17	-2	1164241	1164477	237
458	5	Bacillus thuringiensis C15	93119354	SEIU01_740033	CDS	automatic/finished		Glutaredoxin-like protein, YruB-family		no						no		2022-01-17	-1	3033649	3033885	237
458	5	Pseudomonas sp. B10	93124156	SEIT01_410012	CDS	automatic/finished	grxC	glutaredoxin 3		no						no		2022-01-17	-3	2639038	2639292	255
458	5	Pseudomonas sp. SWI36 SWI36_1	77223653	SEIS01_130022	CDS	automatic/finished		Glutathione-dependent peroxiredoxin	1.11.1.27	no						no		2020-07-15	1	524503	525003	501
458	5	Pseudomonas sp. SWI36 SWI36_1	77226100	SEIS01_1420005	CDS	automatic/finished	grxC	glutaredoxin 3		no						no		2020-07-15	-1	3026014	3026268	255
458	5	Pseudomonas sp. SWI36 SWI36_2	77218736	SEIQ01_460064	CDS	automatic/finished		Glutathione-dependent peroxiredoxin	1.11.1.27	no						no		2020-07-15	-2	1260723	1261223	501
458	5	Pseudomonas sp. SWI36 SWI36_2	77219922	SEIQ01_1280005	CDS	automatic/finished	grxC	glutaredoxin 3		no						no		2020-07-15	-1	2476216	2476470	255
47	5	Bacillus albus PFYN01	93127613	SEIR01_10052	CDS	automatic/finished	glyA	serine hydroxymethyltransferase (PLP-dependent)	2.1.2.1	no	e : enzyme			16.2 : Construct biomass (Anabolism) ;	11390694, 11902725, 12682299, 12686103, 12923093, 15865438, 18483062, 19171795	no	2a : Function from experimental evidences in other organisms	2022-01-17	-3	47832	49073	1242
47	5	Bacillus thuringiensis C15	93116451	SEIU01_20018	CDS	automatic/finished	glyA	serine hydroxymethyltransferase (PLP-dependent)	2.1.2.1	no	e : enzyme			16.2 : Construct biomass (Anabolism) ;	11390694, 11902725, 12682299, 12686103, 12923093, 15865438, 18483062, 19171795	no	2a : Function from experimental evidences in other organisms	2022-01-17	-2	267426	268667	1242
47	5	Pseudomonas sp. B10	93121802	SEIT01_10108	CDS	automatic/finished	glyA	serine hydroxymethyltransferase	2.1.2.1	no						no		2022-01-17	-1	122868	124121	1254
47	5	Pseudomonas sp. B10	93122064	SEIT01_20047	CDS	automatic/finished	glyA	serine hydroxymethyltransferase	2.1.2.1	no						no		2022-01-17	-3	399811	401064	1254
47	5	Pseudomonas sp. SWI36 SWI36_1	77226211	SEIS01_1440006	CDS	automatic/finished	glyA	serine hydroxymethyltransferase	2.1.2.1, 4.1.2.-	no						no		2020-07-15	2	3139559	3140812	1254
47	5	Pseudomonas sp. SWI36 SWI36_1	77228165	SEIS01_1930047	CDS	automatic/finished	glyA	serine hydroxymethyltransferase	2.1.2.1, 4.1.2.-	no						no		2020-07-15	3	5256864	5258117	1254
47	5	Pseudomonas sp. SWI36 SWI36_2	77218126	SEIQ01_130047	CDS	automatic/finished	glyA	serine hydroxymethyltransferase	2.1.2.1, 4.1.2.-	no						no		2020-07-15	2	575450	576703	1254
47	5	Pseudomonas sp. SWI36 SWI36_2	77220493	SEIQ01_1370042	CDS	automatic/finished	glyA	serine hydroxymethyltransferase	2.1.2.1, 4.1.2.-	no						no		2020-07-15	-1	3093751	3095004	1254
4723	5	Bacillus albus PFYN01	93132337	SEIR01_3340058	CDS	automatic/finished	spsK	putative dTDP-4-dehydrorhamnose reductase	1.1.1.133	no	e : enzyme			16.5 : Explore ; 16.8 : Protect ; 16.13 : Shape ;		no	3 : Putative function from multiple computational evidences	2022-01-17	-2	4299337	4300191	855
4723	5	Bacillus thuringiensis C15	93118073	SEIU01_540030	CDS	automatic/finished		dTDP-4-dehydrorhamnose reductase	1.1.1.133	no						no		2022-01-17	1	1818121	1818975	855
4723	5	Pseudomonas sp. B10	93124207	SEIT01_410063	CDS	automatic/finished	rfbD	dTDP-4-dehydrorhamnose reductase	1.1.1.133	no						no		2022-01-17	1	2687521	2688390	870
4723	5	Pseudomonas sp. SWI36 SWI36_1	77224568	SEIS01_680002	CDS	automatic/finished	rfbD	dTDP-4-dehydrorhamnose reductase	1.1.1.133	no						no		2020-07-15	-1	1481104	1482009	906
4723	5	Pseudomonas sp. SWI36 SWI36_2	77219231	SEIQ01_900002	CDS	automatic/finished	rfbD	dTDP-4-dehydrorhamnose reductase	1.1.1.133	no						no		2020-07-15	-1	1785883	1786788	906
478	5	Bacillus albus PFYN01	93133330	SEIR01_4330020	CDS	automatic/finished	apt	adenine phosphoribosyltransferase	2.4.2.7	no	e : enzyme			16.11 : Scavenge (Catabolism) ;	6408059, 9383190, 15629952, 33225145	no	2a : Function from experimental evidences in other organisms	2022-01-17	2	5240894	5241406	513
478	5	Bacillus thuringiensis C15	93116708	SEIU01_130064	CDS	automatic/finished	apt	adenine phosphoribosyltransferase	2.4.2.7	no	e : enzyme			16.11 : Scavenge (Catabolism) ;	6408059, 9383190, 15629952, 33225145	no	2a : Function from experimental evidences in other organisms	2022-01-17	1	537964	538476	513
478	5	Pseudomonas sp. B10	93122894	SEIT01_280023	CDS	automatic/finished	apt	adenine phosphoribosyltransferase	2.4.2.7	no						no		2022-01-17	-1	1261632	1262180	549
478	5	Pseudomonas sp. SWI36 SWI36_1	77223566	SEIS01_80013	CDS	automatic/finished	apt	adenine phosphoribosyltransferase	2.4.2.7	no						no		2020-07-15	3	429996	430544	549
478	5	Pseudomonas sp. SWI36 SWI36_2	77218074	SEIQ01_120013	CDS	automatic/finished	apt	adenine phosphoribosyltransferase	2.4.2.7	no						no		2020-07-15	3	521949	522497	549
481	5	Bacillus albus PFYN01	93133551	SEIR01_4370026	CDS	automatic/finished	nadC	nicotinate-nucleotide pyrophosphorylase (quinolinate phosphoribosyltransferase)	2.4.2.19	no	e : enzyme			16.2 : Construct biomass (Anabolism) ;	8419294, 28618168	no	2a : Function from experimental evidences in other organisms	2022-01-17	1	5431033	5431866	834
481	5	Bacillus thuringiensis C15	93116688	SEIU01_130044	CDS	automatic/finished	nadC	nicotinate-nucleotide pyrophosphorylase (quinolinate phosphoribosyltransferase)	2.4.2.19	no	e : enzyme			16.2 : Construct biomass (Anabolism) ;	8419294, 28618168	no	2a : Function from experimental evidences in other organisms	2022-01-17	2	517019	517852	834
481	5	Pseudomonas sp. B10	93124382	SEIT01_430101	CDS	automatic/finished	nadC	quinolinate phosphoribosyltransferase (decarboxylating)	2.4.2.19	no						no		2022-01-17	1	2889421	2890269	849
481	5	Pseudomonas sp. SWI36 SWI36_1	77227104	SEIS01_1610021	CDS	automatic/finished	nadC	quinolinate phosphoribosyltransferase (decarboxylating)	2.4.2.19	no						no		2020-07-15	3	4096626	4097474	849
481	5	Pseudomonas sp. SWI36 SWI36_2	77222634	SEIQ01_1900020	CDS	automatic/finished	nadC	quinolinate phosphoribosyltransferase (decarboxylating)	2.4.2.19	no						no		2020-07-15	3	5340990	5341838	849
482	5	Bacillus albus PFYN01	93127597	SEIR01_10036	CDS	automatic/finished	nuoA	NADH-quinone oxidoreductase subunit A	7.1.1.-	no						no		2022-01-17	-2	33889	34257	369
482	5	Bacillus thuringiensis C15	93116436	SEIU01_20003	CDS	automatic/finished	nuoA	NADH-quinone oxidoreductase subunit A	7.1.1.-	no						no		2022-01-17	-1	253474	253842	369
482	5	Pseudomonas sp. B10	93127101	SEIT01_980088	CDS	automatic/finished	nuoA	NADH:quinone oxidoreductase subunit A	7.1.1.2	no						no		2022-01-17	-2	5801081	5801494	414
482	5	Pseudomonas sp. SWI36 SWI36_1	77225345	SEIS01_1300016	CDS	automatic/finished	nuoA	NADH:quinone oxidoreductase subunit A	1.6.5.-, 7.1.1.2	no						no		2020-07-15	2	2250089	2250502	414
482	5	Pseudomonas sp. SWI36 SWI36_2	77219844	SEIQ01_1260041	CDS	automatic/finished	nuoA	NADH:quinone oxidoreductase subunit A	1.6.5.-, 7.1.1.2	no						no		2020-07-15	-1	2394727	2395140	414
483	5	Bacillus albus PFYN01	93127596	SEIR01_10035	CDS	automatic/finished	nuoB	NADH-quinone oxidoreductase subunit B	7.1.1.-	no						no		2022-01-17	-1	33380	33898	519
483	5	Bacillus thuringiensis C15	93116435	SEIU01_20002	CDS	automatic/finished	nuoB	NADH-quinone oxidoreductase subunit B	7.1.1.-	no						no		2022-01-17	-3	252965	253483	519
483	5	Pseudomonas sp. B10	93127100	SEIT01_980087	CDS	automatic/finished	nuoB	NADH:quinone oxidoreductase subunit B	7.1.1.2	no						no		2022-01-17	-3	5800396	5801070	675
483	5	Pseudomonas sp. SWI36 SWI36_1	77225346	SEIS01_1300017	CDS	automatic/finished	nuoB	NADH:quinone oxidoreductase subunit B	1.6.5.-, 7.1.1.2	no						no		2020-07-15	2	2250512	2251189	678
483	5	Pseudomonas sp. SWI36 SWI36_2	77219843	SEIQ01_1260040	CDS	automatic/finished	nuoB	NADH:quinone oxidoreductase subunit B	1.6.5.-, 7.1.1.2	no						no		2020-07-15	-1	2394040	2394717	678
484	5	Bacillus albus PFYN01	93127594	SEIR01_10033	CDS	automatic/finished	nuoD	NADH-quinone oxidoreductase subunit D	7.1.1.-	no						no		2022-01-17	-2	31153	32253	1101
484	5	Bacillus thuringiensis C15	93119634	SEIU01_760035	CDS	automatic/finished	nuoD	NADH-quinone oxidoreductase subunit D	7.1.1.-	no						no		2022-01-17	-1	3299449	3300549	1101
484	5	Pseudomonas sp. B10	93127099	SEIT01_980086	CDS	automatic/finished	nuoC	NADH:quinone oxidoreductase subunit CD	7.1.1.2	no						no		2022-01-17	-3	5798542	5800326	1785
484	5	Pseudomonas sp. SWI36 SWI36_1	77225347	SEIS01_1300018	CDS	automatic/finished	nuoC	NADH:quinone oxidoreductase subunit CD	1.6.5.-, 7.1.1.2	no						no		2020-07-15	3	2251269	2253050	1782
484	5	Pseudomonas sp. SWI36 SWI36_2	77219842	SEIQ01_1260039	CDS	automatic/finished	nuoC	NADH:quinone oxidoreductase subunit CD	1.6.5.-, 7.1.1.2	no						no		2020-07-15	-2	2392179	2393960	1782
486	5	Bacillus albus PFYN01	93127590	SEIR01_10029	CDS	automatic/finished	nuoK	NADH-quinone oxidoreductase subunit K	7.1.1.-	no						no		2022-01-17	-3	28878	29192	315
486	5	Bacillus thuringiensis C15	93119630	SEIU01_760031	CDS	automatic/finished	nuoK	NADH-quinone oxidoreductase subunit K	7.1.1.-	no						no		2022-01-17	-1	3297175	3297489	315
486	5	Pseudomonas sp. B10	93127092	SEIT01_980079	CDS	automatic/finished	nuoK	NADH:quinone oxidoreductase subunit K	7.1.1.2	no						no		2022-01-17	-1	5791452	5791760	309
486	5	Pseudomonas sp. B10	93127093	SEIT01_980080	CDS	automatic/finished	nuoJ	NADH:quinone oxidoreductase subunit J	7.1.1.2	no						no		2022-01-17	-1	5791764	5792264	501
486	5	Pseudomonas sp. SWI36 SWI36_1	77225353	SEIS01_1300024	CDS	automatic/finished	nuoJ	NADH:quinone oxidoreductase subunit J	1.6.5.-, 7.1.1.2	no						no		2020-07-15	3	2259330	2259830	501
486	5	Pseudomonas sp. SWI36 SWI36_1	77225354	SEIS01_1300025	CDS	automatic/finished	nuoK	NADH:quinone oxidoreductase subunit K	1.6.5.-, 7.1.1.2	no						no		2020-07-15	3	2259834	2260142	309
486	5	Pseudomonas sp. SWI36 SWI36_2	77219835	SEIQ01_1260032	CDS	automatic/finished	nuoK	NADH:quinone oxidoreductase subunit K	1.6.5.-, 7.1.1.2	no						no		2020-07-15	-2	2385087	2385395	309
486	5	Pseudomonas sp. SWI36 SWI36_2	77219836	SEIQ01_1260033	CDS	automatic/finished	nuoJ	NADH:quinone oxidoreductase subunit J	1.6.5.-, 7.1.1.2	no						no		2020-07-15	-2	2385399	2385899	501
488	5	Bacillus albus PFYN01	93128349	SEIR01_240048	CDS	automatic/finished	rpmF	ribosomal protein L32		no	f : factor			16.1 : Circulate ;	12682299	no	2a : Function from experimental evidences in other organisms	2022-01-17	-1	691052	691225	174
488	5	Bacillus thuringiensis C15	93119420	SEIU01_740099	CDS	automatic/finished	rpmF	ribosomal protein L32		no	f : factor			16.1 : Circulate ;	12682299	no	2a : Function from experimental evidences in other organisms	2022-01-17	2	3089114	3089287	174
488	5	Pseudomonas sp. B10	93124976	SEIT01_510032	CDS	automatic/finished	rpmF	50S ribosomal subunit protein L32		no						no		2022-01-17	2	3525320	3525502	183
488	5	Pseudomonas sp. SWI36 SWI36_1	77228342	SEIS01_1990025	CDS	automatic/finished	rpmF	50S ribosomal subunit protein L32		no						no		2020-07-15	-2	5444949	5445131	183
488	5	Pseudomonas sp. SWI36 SWI36_2	77222706	SEIQ01_1930025	CDS	automatic/finished	rpmF	50S ribosomal subunit protein L32		no						no		2020-07-15	-3	5410883	5411065	183
535	5	Bacillus albus PFYN01	93129467	SEIR01_850005	CDS	automatic/finished	pxpA	oxoprolinase subunit A	3.5.2.9	no	e : enzyme			16.6 : Maintain ; 16.11 : Scavenge (Catabolism) ;	9334321, 28830929	no	2a : Function from experimental evidences in other organisms	2022-01-17	-2	1695487	1696248	762
535	5	Bacillus thuringiensis C15	93117665	SEIU01_510063	CDS	automatic/finished	pxpA	oxoprolinase subunit A	3.5.2.9	no	e : enzyme			16.6 : Maintain ; 16.11 : Scavenge (Catabolism) ;	9334321, 28830929	no	2a : Function from experimental evidences in other organisms	2022-01-17	-3	1450373	1451134	762
535	5	Pseudomonas sp. B10	93122230	SEIT01_130035	CDS	automatic/finished	pxpA	5-oxoprolinase component A	3.5.2.9	no						no		2022-01-17	-1	580599	581351	753
535	5	Pseudomonas sp. SWI36 SWI36_1	77225395	SEIS01_1310009	CDS	automatic/finished	pxpA	5-oxoprolinase subunit A 1	3.5.2.9	no						no		2020-07-15	-3	2306678	2307436	759
535	5	Pseudomonas sp. SWI36 SWI36_1	77227913	SEIS01_1850003	CDS	automatic/finished	pxpA	5-oxoprolinase subunit A 2	3.5.2.9	no						no		2020-07-15	2	4995776	4996552	777
535	5	Pseudomonas sp. SWI36 SWI36_2	77220533	SEIQ01_1380035	CDS	automatic/finished	pxpA	5-oxoprolinase subunit A 2	3.5.2.9	no						no		2020-07-15	3	3136854	3137630	777
535	5	Pseudomonas sp. SWI36 SWI36_2	77222881	SEIQ01_1990080	CDS	automatic/finished	pxpA	5-oxoprolinase subunit A 1	3.5.2.9	no						no		2020-07-15	-2	5582796	5583554	759
539	5	Bacillus albus PFYN01	93127620	SEIR01_10059	CDS	automatic/finished	ywrF	putative flavin-binding monooxygenase	1.14.13.-	no	e : enzyme					no	3 : Putative function from multiple computational evidences	2022-01-17	1	52621	53232	612
539	5	Bacillus thuringiensis C15	93116458	SEIU01_20025	CDS	automatic/finished	ywrF	putative flavin-binding monooxygenase	1.14.13.-	no	e : enzyme					no	3 : Putative function from multiple computational evidences	2022-01-17	2	272213	272824	612
539	5	Pseudomonas sp. B10	93123643	SEIT01_340090	CDS	automatic/finished		Flavin reductase (DIM6/NTAB) family NADH-FMN oxidoreductase RutF		no						no		2022-01-17	-3	2117182	2117811	630
539	5	Pseudomonas sp. B10	93124276	SEIT01_420055	CDS	automatic/finished		Flavin reductase family protein		no						no		2022-01-17	3	2772981	2773640	660
539	5	Pseudomonas sp. SWI36 SWI36_1	77226405	SEIS01_1470050	CDS	automatic/finished		Flavin reductase family protein		no						no		2020-07-15	-1	3332860	3333465	606
539	5	Pseudomonas sp. SWI36 SWI36_2	77218306	SEIQ01_240002	CDS	automatic/finished		Flavin reductase family protein		no						no		2020-07-15	2	779312	779917	606
5543	5	Bacillus albus PFYN01	93128134	SEIR01_140005	CDS	automatic/finished	dhbF	siderophore 2,3-dihydroxybenzoate-glycine-threonine trimeric ester bacillibactin synthetase	5.1.1.-, 2.7.7.-	no	e : enzyme			16.2 : Construct biomass (Anabolism) ; 16.11 : Scavenge (Catabolism) ;	11112781, 12354229, 16672620, 18957859, 26284661, 27731335	no	2a : Function from experimental evidences in other organisms	2022-01-17	3	497229	504386	7158
5543	5	Bacillus albus PFYN01	93131083	SEIR01_2010010	CDS	automatic/finished		D-alanine--poly(phosphoribitol) ligase subunit 1	6.1.1.13	no						no		2022-01-17	-2	3160714	3162291	1578
5543	5	Bacillus albus PFYN01	93132610	SEIR01_3680002	CDS	automatic/finished		fengycin family lipopeptide synthetase B		no						no		2022-01-17	1	4534903	4539459	4557
5543	5	Bacillus albus PFYN01	93132611	SEIR01_3680003	CDS	automatic/finished		D-alanine--poly(phosphoribitol) ligase subunit 1	6.1.1.13	no						no		2022-01-17	3	4539462	4545932	6471
5543	5	Bacillus thuringiensis C15	93119674	SEIU01_780002	CDS	automatic/finished		fengycin family lipopeptide synthetase B		no						no		2022-01-17	1	3336328	3340884	4557
5543	5	Bacillus thuringiensis C15	93119675	SEIU01_780003	CDS	automatic/finished		D-alanine--poly(phosphoribitol) ligase subunit 1	6.1.1.13	no						no		2022-01-17	3	3340887	3347357	6471
5543	5	Bacillus thuringiensis C15	93120273	SEIU01_940005	CDS	automatic/finished	dhbF	siderophore 2,3-dihydroxybenzoate-glycine-threonine trimeric ester bacillibactin synthetase	5.1.1.-, 2.7.7.-	no	e : enzyme			16.2 : Construct biomass (Anabolism) ; 16.11 : Scavenge (Catabolism) ;	11112781, 12354229, 16672620, 18957859, 26284661, 27731335	no	2a : Function from experimental evidences in other organisms	2022-01-17	3	3958761	3965918	7158
5543	5	Pseudomonas sp. B10	93122931	SEIT01_280060	CDS	automatic/finished	ddaC	Dapdiamide synthesis protein DdaC	1.-.-.-	no						no		2022-01-17	3	1293981	1294964	984
5543	5	Pseudomonas sp. B10	93122932	SEIT01_280061	CDS	automatic/finished		Amino acid adenylation domain-containing protein		no						no		2022-01-17	1	1295152	1298553	3402
5543	5	Pseudomonas sp. B10	93122933	SEIT01_280062	CDS	automatic/finished		Non-ribosomal peptide synthetase		no						no		2022-01-17	3	1298550	1306385	7836
5543	5	Pseudomonas sp. B10	93122934	SEIT01_280063	CDS	automatic/finished	lgrB	ATP-dependent D-leucine adenylase / Leucine racemase [ATP-hydrolyzing] / ATP-dependent alanine adenylase / ATP-dependent D-valine adenylase / Valine racemase [ATP-hydrolyzing]	5.1.1.-	no						no		2022-01-17	1	1306399	1318725	12327
5543	5	Pseudomonas sp. B10	93124944	SEIT01_500051	CDS	automatic/finished		Non-ribosomal peptide synthetase		no						no		2022-01-17	1	3487411	3493095	5685
5543	5	Pseudomonas sp. B10	93125344	SEIT01_560007	CDS	automatic/finished		D-alanine--poly(phosphoribitol) ligase subunit 1	6.1.1.13	no						no		2022-01-17	3	3920832	3933833	13002
5543	5	Pseudomonas sp. B10	93126188	SEIT01_720013	CDS	automatic/finished		Non-ribosomal peptide synthetase		no						no		2022-01-17	-2	4807823	4816123	8301
5543	5	Pseudomonas sp. B10	93126189	SEIT01_720014	CDS	automatic/finished		Non-ribosomal peptide synthetase		no						no		2022-01-17	-3	4816120	4829118	12999
5543	5	Pseudomonas sp. B10	93126191	SEIT01_720016	CDS	automatic/finished		protein of unknown function		no	u : unknown	1 : Unknown				no	5 : Unknown function	2022-01-17	-1	4829304	4830020	717
5543	5	Pseudomonas sp. SWI36 SWI36_1	77223959	SEIS01_250001	CDS	automatic/finished		putative D-alanine--poly(phosphoribitol) ligase	6.1.1.13	no	e : enzyme					no	3 : Putative function from multiple computational evidences	2020-07-15	-3	818591	827683	9093
5543	5	Pseudomonas sp. SWI36 SWI36_1	77224174	SEIS01_380001	CDS	automatic/finished		Non-ribosomal peptide synthetase		no						no		2020-07-15	-2	1058649	1067732	9084
5543	5	Pseudomonas sp. SWI36 SWI36_1	77224175	SEIS01_380002	CDS	automatic/finished		protein of unknown function		no	u : unknown	1 : Unknown				no	5 : Unknown function	2020-07-15	-2	1067745	1070936	3192
5543	5	Pseudomonas sp. SWI36 SWI36_1	77224672	SEIS01_770001	CDS	automatic/finished		protein of unknown function		no	u : unknown	1 : Unknown				no	5 : Unknown function	2020-07-15	1	1609297	1613721	4425
5543	5	Pseudomonas sp. SWI36 SWI36_1	77224888	SEIS01_990001	CDS	automatic/finished		protein of unknown function		no	u : unknown	1 : Unknown				no	5 : Unknown function	2020-07-15	1	1828672	1828968	297
5543	5	Pseudomonas sp. SWI36 SWI36_1	77224889	SEIS01_990002	CDS	automatic/finished		protein of unknown function		no	u : unknown	1 : Unknown				no	5 : Unknown function	2020-07-15	3	1828965	1830362	1398
5543	5	Pseudomonas sp. SWI36 SWI36_1	77224890	SEIS01_1000001	CDS	automatic/finished		protein of unknown function		no	u : unknown	1 : Unknown				no	5 : Unknown function	2020-07-15	-2	1830453	1832063	1611
5543	5	Pseudomonas sp. SWI36 SWI36_1	77224985	SEIS01_1050001	CDS	automatic/finished		Non-ribosomal peptide synthetase modules, pyoverdine		no						no		2020-07-15	-2	1908363	1909910	1548
5543	5	Pseudomonas sp. SWI36 SWI36_1	77225246	SEIS01_1150001	CDS	automatic/finished		Non-ribosomal peptide synthetase modules, pyoverdine		no						no		2020-07-15	1	2147905	2149269	1365
5543	5	Pseudomonas sp. SWI36 SWI36_1	77228409	SEIS01_2030001	CDS	automatic/finished		Pyoverdine chromophore precursor synthetase PvdL		no						no		2020-07-15	-1	5513383	5526336	12954
5543	5	Pseudomonas sp. SWI36 SWI36_2	77218036	SEIQ01_100001	CDS	automatic/finished		protein of unknown function		no	u : unknown	1 : Unknown				no	5 : Unknown function	2020-07-15	3	476199	480623	4425
5543	5	Pseudomonas sp. SWI36 SWI36_2	77218404	SEIQ01_260005	CDS	automatic/finished		putative D-alanine--poly(phosphoribitol) ligase	6.1.1.13	no	e : enzyme					no	3 : Putative function from multiple computational evidences	2020-07-15	1	884260	893355	9096
5543	5	Pseudomonas sp. SWI36 SWI36_2	77218570	SEIQ01_360001	CDS	automatic/finished		protein of unknown function		no	u : unknown	1 : Unknown				no	5 : Unknown function	2020-07-15	1	1088236	1091427	3192
5543	5	Pseudomonas sp. SWI36 SWI36_2	77218571	SEIQ01_360002	CDS	automatic/finished		Non-ribosomal peptide synthetase		no						no		2020-07-15	1	1091440	1100523	9084
5543	5	Pseudomonas sp. SWI36 SWI36_2	77219309	SEIQ01_950001	CDS	automatic/finished		protein of unknown function		no	u : unknown	1 : Unknown				no	5 : Unknown function	2020-07-15	2	1870061	1870387	327
5543	5	Pseudomonas sp. SWI36 SWI36_2	77219310	SEIQ01_950002	CDS	automatic/finished		protein of unknown function		no	u : unknown	1 : Unknown				no	5 : Unknown function	2020-07-15	1	1870384	1871781	1398
5543	5	Pseudomonas sp. SWI36 SWI36_2	77219315	SEIQ01_990001	CDS	automatic/finished		protein of unknown function		no	u : unknown	1 : Unknown				no	5 : Unknown function	2020-07-15	1	1877173	1878744	1572
5543	5	Pseudomonas sp. SWI36 SWI36_2	77219316	SEIQ01_1000001	CDS	automatic/finished		Non-ribosomal peptide synthetase modules, pyoverdine		no						no		2020-07-15	2	1878872	1880419	1548
5543	5	Pseudomonas sp. SWI36 SWI36_2	77219403	SEIQ01_1080001	CDS	automatic/finished		Non-ribosomal peptide synthetase modules, pyoverdine		no						no		2020-07-15	1	1963747	1965111	1365
5543	5	Pseudomonas sp. SWI36 SWI36_2	77222791	SEIQ01_1980001	CDS	automatic/finished		Pyoverdine chromophore precursor synthetase PvdL		no						no		2020-07-15	-2	5500617	5513570	12954
55693	5	Bacillus albus PFYN01	93128475	SEIR01_300009	CDS	automatic/finished	yczG	putative transcriptional regulator (ArsR family)		no	r : regulator			16.3 : Control ;		no	3 : Putative function from multiple computational evidences	2022-01-17	-3	798144	798452	309
55693	5	Bacillus thuringiensis C15	93117450	SEIU01_490021	CDS	automatic/finished	yczG	putative transcriptional regulator (ArsR family)		no	r : regulator			16.3 : Control ;		no	3 : Putative function from multiple computational evidences	2022-01-17	-2	1250157	1250465	309
55693	5	Pseudomonas sp. B10	93124470	SEIT01_430189	CDS	automatic/finished	yczG	Uncharacterized HTH-type transcriptional regulator YczG		no						no		2022-01-17	-2	2978501	2978866	366
55693	5	Pseudomonas sp. SWI36 SWI36_1	77227690	SEIS01_1780031	CDS	automatic/finished	yczG	Uncharacterized HTH-type transcriptional regulator YczG		no						no		2020-07-15	3	4747125	4747433	309
55693	5	Pseudomonas sp. SWI36 SWI36_2	77220499	SEIQ01_1380001	CDS	automatic/finished	yczG	Uncharacterized HTH-type transcriptional regulator YczG		no						no		2020-07-15	-2	3103674	3103982	309
565	5	Bacillus albus PFYN01	93133005	SEIR01_4230078	CDS	automatic/finished	dapA	4-hydroxy-tetrahydrodipicolinate synthase	4.3.3.7	no	e : enzyme			16.2 : Construct biomass (Anabolism) ;	8098035, 9298659	no	2a : Function from experimental evidences in other organisms	2022-01-17	2	4931870	4932748	879
565	5	Bacillus thuringiensis C15	93116853	SEIU01_240030	CDS	automatic/finished	dapA	4-hydroxy-tetrahydrodipicolinate synthase	4.3.3.7	no	e : enzyme			16.2 : Construct biomass (Anabolism) ;	8098035, 9298659	no	2a : Function from experimental evidences in other organisms	2022-01-17	3	674232	675110	879
565	5	Pseudomonas sp. B10	93122273	SEIT01_130078	CDS	automatic/finished	dapA	4-hydroxy-tetrahydrodipicolinate synthase	4.3.3.7	no						no		2022-01-17	-3	619264	620142	879
565	5	Pseudomonas sp. SWI36 SWI36_1	77224942	SEIS01_1010052	CDS	automatic/finished	dapA	4-hydroxy-tetrahydrodipicolinate synthase	4.3.3.7	no						no		2020-07-15	-3	1868081	1868968	888
565	5	Pseudomonas sp. SWI36 SWI36_2	77221577	SEIQ01_1590052	CDS	automatic/finished	dapA	4-hydroxy-tetrahydrodipicolinate synthase	4.3.3.7	no						no		2020-07-15	-3	4197743	4198630	888
5745	5	Bacillus albus PFYN01	93128775	SEIR01_460016	CDS	automatic/finished	pbuX	xanthine permease		no	t : transporter			16.1 : Circulate ;	9098051, 12923093, 15549109, 15849754, 16850406	no	2a : Function from experimental evidences in other organisms	2022-01-17	-1	1069403	1070725	1323
5745	5	Bacillus thuringiensis C15	93121289	SEIU01_1180175	CDS	automatic/finished	pbuX	xanthine permease		no	t : transporter			16.1 : Circulate ;	9098051, 12923093, 15549109, 15849754, 16850406	no	2a : Function from experimental evidences in other organisms	2022-01-17	1	4886692	4888014	1323
5745	5	Pseudomonas sp. B10	93122960	SEIT01_280089	CDS	automatic/finished	uacT	Uric acid transporter UacT		no						no		2022-01-17	3	1351593	1353113	1521
5745	5	Pseudomonas sp. B10	93123769	SEIT01_360028	CDS	automatic/finished	uacT	urate:H(+) symporter		no						no		2022-01-17	-3	2240527	2241885	1359
5745	5	Pseudomonas sp. B10	93126545	SEIT01_800016	CDS	automatic/finished	uacT	Uric acid transporter UacT		no						no		2022-01-17	2	5211089	5212444	1356
5745	5	Pseudomonas sp. B10	93126896	SEIT01_900012	CDS	automatic/finished	pbuX	Xanthine permease		no						no		2022-01-17	-3	5579236	5580576	1341
5745	5	Pseudomonas sp. B10	93127376	SEIT01_1090099	CDS	automatic/finished	xanP	Xanthine permease XanP		no						no		2022-01-17	1	6084361	6085827	1467
5745	5	Pseudomonas sp. SWI36 SWI36_1	77225589	SEIS01_1340024	CDS	automatic/finished	uacT	Uric acid transporter UacT		no						no		2020-07-15	1	2503210	2504727	1518
5745	5	Pseudomonas sp. SWI36 SWI36_1	77227012	SEIS01_1600020	CDS	automatic/finished	xanP	xanthine:H(+) symporter XanP		no						no		2020-07-15	2	3970349	3971728	1380
5745	5	Pseudomonas sp. SWI36 SWI36_1	77227625	SEIS01_1760028	CDS	automatic/finished	uacT	urate:H(+) symporter		no						no		2020-07-15	-2	4679460	4680815	1356
5745	5	Pseudomonas sp. SWI36 SWI36_2	77219995	SEIQ01_1290034	CDS	automatic/finished	uacT	Uric acid transporter UacT		no						no		2020-07-15	-2	2572161	2573678	1518
5745	5	Pseudomonas sp. SWI36 SWI36_2	77221837	SEIQ01_1660067	CDS	automatic/finished	xanP	xanthine:H(+) symporter XanP		no						no		2020-07-15	-3	4490975	4492354	1380
5745	5	Pseudomonas sp. SWI36 SWI36_2	77222005	SEIQ01_1710028	CDS	automatic/finished	uacT	urate:H(+) symporter		no						no		2020-07-15	-2	4671777	4673132	1356
5749	5	Bacillus albus PFYN01	93131127	SEIR01_2060002	CDS	automatic/finished	sdaAA	L-serine dehydratase (alpha chain)	4.3.1.17	no	e : enzyme			16.8 : Protect ; 16.11 : Scavenge (Catabolism) ;	2504697, 16014871, 22686449	no	2a : Function from experimental evidences in other organisms	2022-01-17	1	3210571	3211461	891
5749	5	Bacillus albus PFYN01	93133459	SEIR01_4340123	CDS	automatic/finished	sdaAA	L-serine dehydratase (alpha chain)	4.3.1.17	no	e : enzyme			16.8 : Protect ; 16.11 : Scavenge (Catabolism) ;	2504697, 16014871, 22686449	no	2a : Function from experimental evidences in other organisms	2022-01-17	-2	5353159	5354037	879
5749	5	Bacillus thuringiensis C15	93120420	SEIU01_960121	CDS	automatic/finished	sdaAA	L-serine dehydratase (alpha chain)	4.3.1.17	no	e : enzyme			16.8 : Protect ; 16.11 : Scavenge (Catabolism) ;	2504697, 16014871, 22686449	no	2a : Function from experimental evidences in other organisms	2022-01-17	3	4096878	4097756	879
5749	5	Bacillus thuringiensis C15	93121408	SEIU01_1260002	CDS	automatic/finished	sdaAA	L-serine dehydratase (alpha chain)	4.3.1.17	no	e : enzyme			16.8 : Protect ; 16.11 : Scavenge (Catabolism) ;	2504697, 16014871, 22686449	no	2a : Function from experimental evidences in other organisms	2022-01-17	2	4991033	4991923	891
5749	5	Pseudomonas sp. B10	93121835	SEIT01_10141	CDS	automatic/finished	tdcG	L-serine deaminase III	4.3.1.17	no						no		2022-01-17	-3	159466	160842	1377
5749	5	Pseudomonas sp. B10	93122523	SEIT01_250044	CDS	automatic/finished	sdaB	L-serine deaminase II	4.3.1.17	no						no		2022-01-17	-1	877740	879116	1377
5749	5	Pseudomonas sp. B10	93123000	SEIT01_290030	CDS	automatic/finished	sdaB	L-serine deaminase II	4.3.1.17	no						no		2022-01-17	2	1400498	1401874	1377
5749	5	Pseudomonas sp. SWI36 SWI36_1	77223179	SEIS01_10036	CDS	automatic/finished	tdcG	L-serine deaminase III	4.3.1.17	no						no		2020-07-15	2	37598	38974	1377
5749	5	Pseudomonas sp. SWI36 SWI36_1	77227476	SEIS01_1720002	CDS	automatic/finished	tdcG	L-serine deaminase III	4.3.1.17	no						no		2020-07-15	-3	4526999	4528375	1377
5749	5	Pseudomonas sp. SWI36 SWI36_1	77228139	SEIS01_1930021	CDS	automatic/finished	tdcG	L-serine deaminase III	4.3.1.17	no						no		2020-07-15	2	5227568	5228944	1377
5749	5	Pseudomonas sp. SWI36 SWI36_2	77218100	SEIQ01_130021	CDS	automatic/finished	tdcG	L-serine deaminase III	4.3.1.17	no						no		2020-07-15	1	546154	547530	1377
5749	5	Pseudomonas sp. SWI36 SWI36_2	77220806	SEIQ01_1440020	CDS	automatic/finished	tdcG	L-serine deaminase III	4.3.1.17	no						no		2020-07-15	-3	3414017	3415393	1377
5749	5	Pseudomonas sp. SWI36 SWI36_2	77221922	SEIQ01_1690002	CDS	automatic/finished	tdcG	L-serine deaminase III	4.3.1.17	no						no		2020-07-15	-3	4583021	4584397	1377
5752	5	Bacillus albus PFYN01	93127669	SEIR01_10108	CDS	automatic/finished	speB	agmatinase	3.5.3.11	no	e : enzyme			16.2 : Construct biomass (Anabolism) ; 16.3 : Control ; 16.8 : Protect ;	9723923, 10931887, 24678831, 28807600, 28291380	no	2a : Function from experimental evidences in other organisms	2022-01-17	-2	109063	109935	873
5752	5	Bacillus thuringiensis C15	93116505	SEIU01_20072	CDS	automatic/finished	speB	agmatinase	3.5.3.11	no	e : enzyme			16.2 : Construct biomass (Anabolism) ; 16.3 : Control ; 16.8 : Protect ;	9723923, 10931887, 24678831, 28807600, 28291380	no	2a : Function from experimental evidences in other organisms	2022-01-17	-1	329557	330429	873
5752	5	Pseudomonas sp. B10	93126209	SEIT01_730018	CDS	automatic/finished	gbuA	Guanidinobutyrase	3.5.3.7	no						no		2022-01-17	-1	4853496	4854446	951
5752	5	Pseudomonas sp. B10	93127373	SEIT01_1090096	CDS	automatic/finished	speB	agmatinase	3.5.3.11	no						no		2022-01-17	-3	6081142	6082101	960
5752	5	Pseudomonas sp. SWI36 SWI36_1	77223985	SEIS01_270003	CDS	automatic/finished	speB	agmatinase	3.5.3.11	no						no		2020-07-15	3	849291	850256	966
5752	5	Pseudomonas sp. SWI36 SWI36_1	77226427	SEIS01_1480021	CDS	automatic/finished	gbuA	Guanidinobutyrase	3.5.3.7	no						no		2020-07-15	3	3355056	3356006	951
5752	5	Pseudomonas sp. SWI36 SWI36_2	77221257	SEIQ01_1530031	CDS	automatic/finished	speB	agmatinase	3.5.3.11	no						no		2020-07-15	3	3885426	3886391	966
5752	5	Pseudomonas sp. SWI36 SWI36_2	77221679	SEIQ01_1620029	CDS	automatic/finished	gbuA	Guanidinobutyrase	3.5.3.7	no						no		2020-07-15	1	4303351	4304301	951
5776	5	Bacillus albus PFYN01	93134618	SEIR01_4710009	CDS	automatic/finished	ddlA	D-alanine--D-alanine ligase A	6.3.2.4	no						no		2022-01-17	-3	6386673	6387587	915
5776	5	Bacillus thuringiensis C15	93119764	SEIU01_810022	CDS	automatic/finished	ddlA	D-alanine--D-alanine ligase A	6.3.2.4	no						no		2022-01-17	3	3446763	3447677	915
5776	5	Pseudomonas sp. B10	93122756	SEIT01_270013	CDS	automatic/finished	ddlB	D-alanine--D-alanine ligase B	6.3.2.4	no						no		2022-01-17	-2	1114184	1115158	975
5776	5	Pseudomonas sp. SWI36 SWI36_1	77227228	SEIS01_1650016	CDS	automatic/finished	ddlB	D-alanine--D-alanine ligase B	6.3.2.4	no						no		2020-07-15	-3	4228352	4229308	957
5776	5	Pseudomonas sp. SWI36 SWI36_2	77218370	SEIQ01_240066	CDS	automatic/finished	ddlB	D-alanine--D-alanine ligase B	6.3.2.4	no						no		2020-07-15	-1	846190	847146	957
5782	5	Bacillus albus PFYN01	93133681	SEIR01_4430003	CDS	automatic/finished	cymR	transcriptional regulator of cysteine biosynthesis		no	r : regulator			16.3 : Control ;	15668000, 16109943, 16513748, 17056751, 18974048, 19508281, 21624051, 22553203, 22927394	no	2a : Function from experimental evidences in other organisms	2022-01-17	1	5563096	5563512	417
5782	5	Bacillus thuringiensis C15	93116717	SEIU01_130073	CDS	automatic/finished	cymR	transcriptional regulator of cysteine biosynthesis		no	r : regulator			16.3 : Control ;	15668000, 16109943, 16513748, 17056751, 18974048, 19508281, 21624051, 22553203, 22927394	no	2a : Function from experimental evidences in other organisms	2022-01-17	2	549140	549556	417
5782	5	Pseudomonas sp. B10	93124864	SEIT01_490038	CDS	automatic/finished	iscR	DNA-binding transcriptional dual regulator IscR		no						no		2022-01-17	2	3398909	3399400	492
5782	5	Pseudomonas sp. SWI36 SWI36_1	77226290	SEIS01_1450037	CDS	automatic/finished	iscR	DNA-binding transcriptional dual regulator IscR		no						no		2020-07-15	2	3216494	3216985	492
5782	5	Pseudomonas sp. SWI36 SWI36_2	77220588	SEIQ01_1390036	CDS	automatic/finished	iscR	DNA-binding transcriptional dual regulator IscR		no						no		2020-07-15	2	3188222	3188713	492
5788	5	Bacillus albus PFYN01	93129648	SEIR01_970010	CDS	automatic/finished	thrP	putative amino acid permease		no	t : transporter			16.1 : Circulate ;	15849754, 16850406, 32743959	no	3 : Putative function from multiple computational evidences	2022-01-17	-2	1857133	1858524	1392
5788	5	Bacillus albus PFYN01	93129811	SEIR01_1100003	CDS	automatic/finished	lysP	lysine:H(+) symporter		no						no		2022-01-17	-2	2011378	2012844	1467
5788	5	Bacillus albus PFYN01	93129875	SEIR01_1120049	CDS	automatic/finished	rocE	arginine/ornithine/gamma-aminobutyrate permease		no	t : transporter			16.1 : Circulate ;	7540694, 10648515, 15849754, 16850406, 22720735	no	2a : Function from experimental evidences in other organisms	2022-01-17	-1	2069237	2070658	1422
5788	5	Bacillus albus PFYN01	93130457	SEIR01_1460029	CDS	automatic/finished	alaP	D-alanine (L-alanine) permease		no	t : transporter			16.1 : Circulate ;	15849754, 16850406, 22720735, 33155333	no	2a : Function from experimental evidences in other organisms	2022-01-17	-3	2598837	2600228	1392
5788	5	Bacillus albus PFYN01	93130469	SEIR01_1460041	CDS	automatic/finished	rocC	basic aminoacid permease		no	t : transporter			16.1 : Circulate ;	7540694, 8113162, 15849754, 16850406	no	2b : Function from indirect experimental evidences (e.g. phenotypes)	2022-01-17	-1	2609528	2610943	1416
5788	5	Bacillus albus PFYN01	93130626	SEIR01_1580003	CDS	automatic/finished	lysP	lysine:H(+) symporter		no						no		2022-01-17	-3	2749551	2751044	1494
5788	5	Bacillus albus PFYN01	93132240	SEIR01_3230027	CDS	automatic/finished	rocE	arginine/ornithine/gamma-aminobutyrate permease		no	t : transporter			16.1 : Circulate ;	7540694, 10648515, 15849754, 16850406, 22720735	no	2a : Function from experimental evidences in other organisms	2022-01-17	-3	4201839	4203266	1428
5788	5	Bacillus albus PFYN01	93133297	SEIR01_4320018	CDS	automatic/finished	gabP	gamma-aminobutyrate (GABA) permease; proline permease		no	t : transporter			16.1 : Circulate ; 16.8 : Protect ;	15849754, 16547045, 16850406, 8951816, 9677314, 24142252	no	2a : Function from experimental evidences in other organisms	2022-01-17	3	5211618	5213012	1395
5788	5	Bacillus albus PFYN01	93133503	SEIR01_4360004	CDS	automatic/finished	rocC	basic aminoacid permease		no	t : transporter			16.1 : Circulate ;	7540694, 8113162, 15849754, 16850406	no	2b : Function from indirect experimental evidences (e.g. phenotypes)	2022-01-17	-3	5384133	5385557	1425
5788	5	Bacillus thuringiensis C15	93116928	SEIU01_240105	CDS	automatic/finished	gabP	gamma-aminobutyrate (GABA) permease; proline permease		no	t : transporter			16.1 : Circulate ; 16.8 : Protect ;	15849754, 16547045, 16850406, 8951816, 9677314, 24142252	no	2a : Function from experimental evidences in other organisms	2022-01-17	2	757592	758986	1395
5788	5	Bacillus thuringiensis C15	93117652	SEIU01_510050	CDS	automatic/finished	lysP	lysine:H(+) symporter		no						no		2022-01-17	3	1437279	1438745	1467
5788	5	Bacillus thuringiensis C15	93118484	SEIU01_600044	CDS	automatic/finished	rocC	basic aminoacid permease		no	t : transporter			16.1 : Circulate ;	7540694, 8113162, 15849754, 16850406	no	2b : Function from indirect experimental evidences (e.g. phenotypes)	2022-01-17	3	2210304	2211728	1425
5788	5	Bacillus thuringiensis C15	93119068	SEIU01_680016	CDS	automatic/finished	rocC	basic aminoacid permease		no	t : transporter			16.1 : Circulate ;	7540694, 8113162, 15849754, 16850406	no	2b : Function from indirect experimental evidences (e.g. phenotypes)	2022-01-17	2	2777702	2779117	1416
5788	5	Bacillus thuringiensis C15	93119081	SEIU01_680029	CDS	automatic/finished	alaP	D-alanine (L-alanine) permease		no	t : transporter			16.1 : Circulate ;	15849754, 16850406, 22720735, 33155333	no	2a : Function from experimental evidences in other organisms	2022-01-17	2	2789981	2791372	1392
5788	5	Bacillus thuringiensis C15	93120022	SEIU01_850161	CDS	automatic/finished	rocE	arginine/ornithine/gamma-aminobutyrate permease		no	t : transporter			16.1 : Circulate ;	7540694, 10648515, 15849754, 16850406, 22720735	no	2a : Function from experimental evidences in other organisms	2022-01-17	2	3709856	3711277	1422
5788	5	Bacillus thuringiensis C15	93120629	SEIU01_1000017	CDS	automatic/finished	thrP	putative amino acid permease		no	t : transporter			16.1 : Circulate ;	15849754, 16850406, 32743959	no	3 : Putative function from multiple computational evidences	2022-01-17	2	4277498	4278889	1392
5788	5	Bacillus thuringiensis C15	93121478	SEIU01_1290034	CDS	automatic/finished	rocE	arginine/ornithine/gamma-aminobutyrate permease		no	t : transporter			16.1 : Circulate ;	7540694, 10648515, 15849754, 16850406, 22720735	no	2a : Function from experimental evidences in other organisms	2022-01-17	-2	5056470	5057897	1428
5788	5	Pseudomonas sp. B10	93123866	SEIT01_370031	CDS	automatic/finished	aroP	aromatic amino acid:H(+) symporter AroP		no						no		2022-01-17	1	2337046	2338461	1416
5788	5	Pseudomonas sp. B10	93124179	SEIT01_410035	CDS	automatic/finished	gabP	4-aminobutanoate:H(+) symporter		no						no		2022-01-17	-1	2661135	2662526	1392
5788	5	Pseudomonas sp. B10	93126819	SEIT01_870140	CDS	automatic/finished	gabP	4-aminobutanoate:H(+) symporter		no						no		2022-01-17	-2	5495561	5496967	1407
5788	5	Pseudomonas sp. B10	93127263	SEIT01_1070005	CDS	automatic/finished	proY	putative transporter ProY		no						no	3 : Putative function from multiple computational evidences	2022-01-17	-2	5963924	5965345	1422
5788	5	Pseudomonas sp. SWI36 SWI36_1	77224500	SEIS01_600001	CDS	automatic/finished	aroP	aromatic amino acid:H(+) symporter AroP		no						no		2020-07-15	-2	1418166	1419569	1404
5788	5	Pseudomonas sp. SWI36 SWI36_1	77224716	SEIS01_790036	CDS	automatic/finished	aroP	aromatic amino acid:H(+) symporter AroP		no						no		2020-07-15	1	1654999	1656360	1362
5788	5	Pseudomonas sp. SWI36 SWI36_1	77224840	SEIS01_900045	CDS	automatic/finished	proY	putative transporter ProY		no						no	3 : Putative function from multiple computational evidences	2020-07-15	-3	1781207	1782625	1419
5788	5	Pseudomonas sp. SWI36 SWI36_1	77225332	SEIS01_1300003	CDS	automatic/finished	gabP	4-aminobutyrate:H(+) symporter		no						no		2020-07-15	-2	2234271	2235653	1383
5788	5	Pseudomonas sp. SWI36 SWI36_1	77225403	SEIS01_1310017	CDS	automatic/finished	gabP	4-aminobutyrate:H(+) symporter		no						no		2020-07-15	-2	2316024	2317415	1392
5788	5	Pseudomonas sp. SWI36 SWI36_1	77225679	SEIS01_1350057	CDS	automatic/finished		GABA permease		no						no		2020-07-15	1	2597584	2598966	1383
5788	5	Pseudomonas sp. SWI36 SWI36_1	77225752	SEIS01_1370010	CDS	automatic/finished	cycA	serine/alanine/glycine/cycloserine:H(+)symporter		no						no		2020-07-15	-2	2669265	2670671	1407
5788	5	Pseudomonas sp. SWI36 SWI36_1	77226219	SEIS01_1440014	CDS	automatic/finished	mmuP	S-methyl-L-methionine transporter		no						no		2020-07-15	-3	3147857	3149296	1440
5788	5	Pseudomonas sp. SWI36 SWI36_1	77226515	SEIS01_1490065	CDS	automatic/finished	gabP	4-aminobutyrate:H(+) symporter		no						no		2020-07-15	1	3435964	3437376	1413
5788	5	Pseudomonas sp. SWI36 SWI36_1	77226967	SEIS01_1590012	CDS	automatic/finished	gabP	4-aminobutyrate:H(+) symporter		no						no		2020-07-15	3	3915573	3916964	1392
5788	5	Pseudomonas sp. SWI36 SWI36_1	77227846	SEIS01_1820077	CDS	automatic/finished	rocE	Amino-acid permease RocE		no						no		2020-07-15	-2	4919319	4920725	1407
5788	5	Pseudomonas sp. SWI36 SWI36_1	77228124	SEIS01_1930006	CDS	automatic/finished	gabP	4-aminobutyrate:H(+) symporter		no						no		2020-07-15	2	5212268	5213653	1386
5788	5	Pseudomonas sp. SWI36 SWI36_1	77228575	SEIS01_2090003	CDS	automatic/finished	proY	putative transporter ProY		no						no	3 : Putative function from multiple computational evidences	2020-07-15	2	5703008	5704411	1404
5788	5	Pseudomonas sp. SWI36 SWI36_2	77217756	SEIQ01_10181	CDS	automatic/finished	gabP	4-aminobutyrate:H(+) symporter		no						no		2020-07-15	3	177444	178856	1413
5788	5	Pseudomonas sp. SWI36 SWI36_2	77218085	SEIQ01_130006	CDS	automatic/finished	gabP	4-aminobutyrate:H(+) symporter		no						no		2020-07-15	1	530854	532239	1386
5788	5	Pseudomonas sp. SWI36 SWI36_2	77218624	SEIQ01_410001	CDS	automatic/finished	cycA	serine/alanine/glycine/cycloserine:H(+)symporter		no						no		2020-07-15	2	1148837	1150243	1407
5788	5	Pseudomonas sp. SWI36 SWI36_2	77219357	SEIQ01_1010041	CDS	automatic/finished	aroP	aromatic amino acid:H(+) symporter AroP		no						no		2020-07-15	-3	1918463	1919824	1362
5788	5	Pseudomonas sp. SWI36 SWI36_2	77219857	SEIQ01_1260054	CDS	automatic/finished	gabP	4-aminobutyrate:H(+) symporter		no						no		2020-07-15	3	2409576	2410958	1383
5788	5	Pseudomonas sp. SWI36 SWI36_2	77220406	SEIQ01_1360006	CDS	automatic/finished	proY	putative transporter ProY		no						no	3 : Putative function from multiple computational evidences	2020-07-15	1	3005713	3007131	1419
5788	5	Pseudomonas sp. SWI36 SWI36_2	77220485	SEIQ01_1370034	CDS	automatic/finished	mmuP	S-methyl-L-methionine transporter		no						no		2020-07-15	1	3085267	3086706	1440
5788	5	Pseudomonas sp. SWI36 SWI36_2	77221331	SEIQ01_1550025	CDS	automatic/finished	gabP	4-aminobutyrate:H(+) symporter		no						no		2020-07-15	3	3960306	3961697	1392
5788	5	Pseudomonas sp. SWI36 SWI36_2	77221651	SEIQ01_1620001	CDS	automatic/finished	aroP	aromatic amino acid:H(+) symporter AroP		no						no		2020-07-15	-1	4274467	4275870	1404
5788	5	Pseudomonas sp. SWI36 SWI36_2	77221717	SEIQ01_1640015	CDS	automatic/finished		GABA permease		no						no		2020-07-15	-2	4360860	4362242	1383
5788	5	Pseudomonas sp. SWI36 SWI36_2	77222504	SEIQ01_1880013	CDS	automatic/finished	rocE	Amino-acid permease RocE		no						no		2020-07-15	2	5210315	5211721	1407
5788	5	Pseudomonas sp. SWI36 SWI36_2	77222889	SEIQ01_1990088	CDS	automatic/finished	gabP	4-aminobutyrate:H(+) symporter		no						no		2020-07-15	-1	5592142	5593533	1392
5788	5	Pseudomonas sp. SWI36 SWI36_2	77223064	SEIQ01_2070011	CDS	automatic/finished	proY	putative transporter ProY		no						no	3 : Putative function from multiple computational evidences	2020-07-15	-2	5771217	5772620	1404
5812	5	Bacillus albus PFYN01	93134297	SEIR01_4610006	CDS	automatic/finished	opuAB	L-proline betaine and betonicine ABC transporter (permease)		no	t : transporter			16.1 : Circulate ; 16.8 : Protect ;	8752321, 15849754, 16225868, 16645306, 16850406, 25012968	no	2a : Function from experimental evidences in other organisms	2022-01-17	-2	6116722	6117558	837
5812	5	Bacillus thuringiensis C15	93119134	SEIU01_690039	CDS	automatic/finished	opuAB	L-proline betaine and betonicine ABC transporter (permease)		no	t : transporter			16.1 : Circulate ; 16.8 : Protect ;	8752321, 15849754, 16225868, 16645306, 16850406, 25012968	no	2a : Function from experimental evidences in other organisms	2022-01-17	2	2834810	2835646	837
5812	5	Pseudomonas sp. B10	93121837	SEIT01_10143	CDS	automatic/finished	opuAB	Glycine betaine transport system permease protein OpuAB		no						no		2022-01-17	1	162292	163137	846
5812	5	Pseudomonas sp. B10	93123286	SEIT01_320017	CDS	automatic/finished		glycine betaine/proline transport system permease protein		no						no		2022-01-17	2	1719413	1720264	852
5812	5	Pseudomonas sp. B10	93125583	SEIT01_610003	CDS	automatic/finished		glycine betaine/proline transport system substrate-binding protein		no						no		2022-01-17	-1	4181838	4182689	852
5812	5	Pseudomonas sp. SWI36 SWI36_1	77224621	SEIS01_680055	CDS	automatic/finished		Glycine betaine/L-proline ABC transporter, glycine betaine/L-proline- binding/permease protein		no						no		2020-07-15	-2	1543785	1544645	861
5812	5	Pseudomonas sp. SWI36 SWI36_1	77228137	SEIS01_1930019	CDS	automatic/finished	opuAB	Glycine betaine transport system permease protein OpuAB		no						no		2020-07-15	-2	5225238	5226083	846
5812	5	Pseudomonas sp. SWI36 SWI36_1	77228378	SEIS01_2010012	CDS	automatic/finished		ABC transporter permease		no						no		2020-07-15	2	5484917	5485765	849
5812	5	Pseudomonas sp. SWI36 SWI36_2	77218098	SEIQ01_130019	CDS	automatic/finished	opuAB	Glycine betaine transport system permease protein OpuAB		no						no		2020-07-15	-3	543824	544669	846
5812	5	Pseudomonas sp. SWI36 SWI36_2	77219284	SEIQ01_900055	CDS	automatic/finished		Glycine betaine/L-proline ABC transporter, glycine betaine/L-proline- binding/permease protein		no						no		2020-07-15	-2	1848564	1849424	861
5812	5	Pseudomonas sp. SWI36 SWI36_2	77220335	SEIQ01_1340035	CDS	automatic/finished		ABC transporter permease		no						no		2020-07-15	-1	2928538	2929386	849
5813	5	Bacillus albus PFYN01	93131350	SEIR01_2230096	CDS	automatic/finished	tpx	thiol peroxidase (lipid hydroperoxide reductase)	1.11.1.24	no	e : enzyme			16.6 : Maintain ; 16.8 : Protect ;	12486061, 18588855, 18588855, 23899494, 25355936, 25852656	no	2a : Function from experimental evidences in other organisms	2022-01-17	-2	3420016	3420516	501
5813	5	Bacillus thuringiensis C15	93120894	SEIU01_1070156	CDS	automatic/finished	tpx	thiol peroxidase (lipid hydroperoxide reductase)	1.11.1.24	no	e : enzyme			16.6 : Maintain ; 16.8 : Protect ;	12486061, 18588855, 18588855, 23899494, 25355936, 25852656	no	2a : Function from experimental evidences in other organisms	2022-01-17	-3	4534883	4535383	501
5813	5	Pseudomonas sp. B10	93126877	SEIT01_890008	CDS	automatic/finished	tpx	lipid hydroperoxide peroxidase	1.11.1.24	no						no		2022-01-17	2	5558426	5558926	501
5813	5	Pseudomonas sp. SWI36 SWI36_1	77227335	SEIS01_1680024	CDS	automatic/finished	tpx	lipid hydroperoxide peroxidase	1.11.1.15	no						no		2020-07-15	-3	4350716	4351216	501
5813	5	Pseudomonas sp. SWI36 SWI36_2	77220304	SEIQ01_1340004	CDS	automatic/finished	tpx	lipid hydroperoxide peroxidase	1.11.1.15	no						no		2020-07-15	2	2891006	2891506	501
5825	5	Bacillus albus PFYN01	93130265	SEIR01_1330002	CDS	automatic/finished	mmgE	2-methylcitrate dehydratase (promiscuous)	4.2.1.79, 4.2.1.-	no	e : enzyme			16.11 : Scavenge (Catabolism) ;	17274076, 28956599	no	2a : Function from experimental evidences in other organisms	2022-01-17	2	2430314	2431750	1437
5825	5	Bacillus thuringiensis C15	93121588	SEIU01_1300002	CDS	automatic/finished	mmgE	2-methylcitrate dehydratase (promiscuous)	4.2.1.79, 4.2.1.-	no	e : enzyme			16.11 : Scavenge (Catabolism) ;	17274076, 28956599	no	2a : Function from experimental evidences in other organisms	2022-01-17	1	5189908	5191344	1437
5825	5	Pseudomonas sp. B10	93126485	SEIT01_780009	CDS	automatic/finished	prpD	2-methylcitrate dehydratase	4.2.1.79	no						no		2022-01-17	1	5148439	5149923	1485
5825	5	Pseudomonas sp. SWI36 SWI36_1	77223439	SEIS01_20044	CDS	automatic/finished	prpD	2-methylcitrate dehydratase	4.2.1.79	no						no		2020-07-15	3	290301	291785	1485
5825	5	Pseudomonas sp. SWI36 SWI36_2	77217576	SEIQ01_10001	CDS	automatic/finished	prpD	2-methylcitrate dehydratase	4.2.1.79	no						no		2020-07-15	3	42	1526	1485
5826	5	Bacillus albus PFYN01	93131365	SEIR01_2230111	CDS	automatic/finished	msrC	free methionine-(R)-sulfoxide reductase	1.8.4.14	no	e : enzyme			16.6 : Maintain ;	17535911, 28032445	no	2a : Function from experimental evidences in other organisms	2022-01-17	2	3434540	3435019	480
5826	5	Bacillus thuringiensis C15	93120908	SEIU01_1070170	CDS	automatic/finished	msrC	free methionine-(R)-sulfoxide reductase	1.8.4.14	no	e : enzyme			16.6 : Maintain ;	17535911, 28032445	no	2a : Function from experimental evidences in other organisms	2022-01-17	1	4549333	4549812	480
5826	5	Pseudomonas sp. B10	93126411	SEIT01_760142	CDS	automatic/finished	msrC	free methionine-(R)-sulfoxide reductase	1.8.4.14	no						no		2022-01-17	1	5071192	5071674	483
5826	5	Pseudomonas sp. SWI36 SWI36_1	77224529	SEIS01_630006	CDS	automatic/finished	msrC	free methionine-(R)-sulfoxide reductase	1.8.4.14	no						no		2020-07-15	2	1447349	1447831	483
5826	5	Pseudomonas sp. SWI36 SWI36_2	77218982	SEIQ01_630002	CDS	automatic/finished	msrC	free methionine-(R)-sulfoxide reductase	1.8.4.14	no						no		2020-07-15	-2	1498491	1498973	483
5831	5	Bacillus albus PFYN01	93128503	SEIR01_320007	CDS	automatic/finished		putative 4-hydroxy-4-methyl-2-oxoglutarate aldolase	4.1.3.17, 4.1.1.112	no						no	3 : Putative function from multiple computational evidences	2022-01-17	-3	823896	824375	480
5831	5	Bacillus thuringiensis C15	93118539	SEIU01_610052	CDS	automatic/finished		putative 4-hydroxy-4-methyl-2-oxoglutarate aldolase	4.1.3.17, 4.1.1.112	no						no	3 : Putative function from multiple computational evidences	2022-01-17	-2	2255094	2255573	480
5831	5	Pseudomonas sp. B10	93126489	SEIT01_780013	CDS	automatic/finished	rraA	ribonuclease E inhibitor protein A		no						no		2022-01-17	2	5154599	5155090	492
5831	5	Pseudomonas sp. SWI36 SWI36_1	77227718	SEIS01_1790028	CDS	automatic/finished	rraA	ribonuclease E inhibitor protein A		no						no		2020-07-15	-2	4777359	4777850	492
5831	5	Pseudomonas sp. SWI36 SWI36_2	77221609	SEIQ01_1600030	CDS	automatic/finished	rraA	ribonuclease E inhibitor protein A		no						no		2020-07-15	-1	4236292	4236783	492
5833	5	Bacillus albus PFYN01	93130266	SEIR01_1330003	CDS	automatic/finished	mmgF	2-methylisocitrate lyase	4.1.3.30	no	e : enzyme			16.11 : Scavenge (Catabolism) ;	12706720, 17274076, 28956599	no	2a : Function from experimental evidences in other organisms	2022-01-17	2	2431769	2432677	909
5833	5	Bacillus thuringiensis C15	93121589	SEIU01_1300003	CDS	automatic/finished	mmgF	2-methylisocitrate lyase	4.1.3.30	no	e : enzyme			16.11 : Scavenge (Catabolism) ;	12706720, 17274076, 28956599	no	2a : Function from experimental evidences in other organisms	2022-01-17	2	5191364	5192272	909
5833	5	Pseudomonas sp. B10	93126481	SEIT01_780005	CDS	automatic/finished	prpB	2-methylisocitrate lyase	4.1.3.30	no						no		2022-01-17	1	5142154	5143044	891
5833	5	Pseudomonas sp. SWI36 SWI36_1	77223435	SEIS01_20040	CDS	automatic/finished	prpB	2-methylisocitrate lyase	4.1.3.30	no						no		2020-07-15	2	283958	284848	891
5833	5	Pseudomonas sp. SWI36 SWI36_2	77221182	SEIQ01_1510040	CDS	automatic/finished	prpB	2-methylisocitrate lyase	4.1.3.30	no						no		2020-07-15	1	3810325	3811215	891
5845	5	Bacillus albus PFYN01	93131519	SEIR01_2350005	CDS	automatic/finished	opuE	proline transporter		no	t : transporter			16.1 : Circulate ; 16.8 : Protect ;	9701821, 11902719, 14996799, 15849754, 16850406, 17183215, 22685134	no	2a : Function from experimental evidences in other organisms	2022-01-17	2	3564479	3565957	1479
5845	5	Bacillus albus PFYN01	93132322	SEIR01_3340043	CDS	automatic/finished	putP	proline permease		no	t : transporter			16.1 : Circulate ;	11902719, 14976255, 15849754, 16850406, 21840319, 22139509, 24142252	no	2a : Function from experimental evidences in other organisms	2022-01-17	1	4287622	4289100	1479
5845	5	Bacillus thuringiensis C15	93118088	SEIU01_540045	CDS	automatic/finished	putP	proline permease		no	t : transporter			16.1 : Circulate ;	11902719, 14976255, 15849754, 16850406, 21840319, 22139509, 24142252	no	2a : Function from experimental evidences in other organisms	2022-01-17	-3	1829282	1830760	1479
5845	5	Bacillus thuringiensis C15	93118950	SEIU01_650054	CDS	automatic/finished	opuE	proline transporter		no	t : transporter			16.1 : Circulate ; 16.8 : Protect ;	9701821, 11902719, 14996799, 15849754, 16850406, 17183215, 22685134	no	2a : Function from experimental evidences in other organisms	2022-01-17	3	2662221	2663699	1479
5845	5	Pseudomonas sp. B10	93123380	SEIT01_320111	CDS	automatic/finished	putP	proline:Na(+) symporter		no						no		2022-01-17	3	1827579	1829063	1485
5845	5	Pseudomonas sp. SWI36 SWI36_1	77227449	SEIS01_1710060	CDS	automatic/finished	putP	proline:Na(+) symporter		no						no		2020-07-15	-1	4494340	4495968	1629
5845	5	Pseudomonas sp. SWI36 SWI36_2	77219054	SEIQ01_680038	CDS	automatic/finished	putP	proline:Na(+) symporter		no						no		2020-07-15	-3	1580591	1582219	1629
5849	5	Bacillus albus PFYN01	93127697	SEIR01_10136	CDS	automatic/finished	ung	uracil-DNA glycosylase	3.2.2.27	no	e : enzyme			16.6 : Maintain ; 16.8 : Protect ;	1902430, 9776748, 10080896, 21542855, 22056936	no	2a : Function from experimental evidences in other organisms	2022-01-17	-1	134564	135241	678
5849	5	Bacillus thuringiensis C15	93116534	SEIU01_20101	CDS	automatic/finished	ung	uracil-DNA glycosylase	3.2.2.27	no	e : enzyme			16.6 : Maintain ; 16.8 : Protect ;	1902430, 9776748, 10080896, 21542855, 22056936	no	2a : Function from experimental evidences in other organisms	2022-01-17	-3	355223	355900	678
5849	5	Pseudomonas sp. B10	93122295	SEIT01_130100	CDS	automatic/finished	ung	uracil-DNA glycosylase	3.2.2.27	no						no		2022-01-17	-1	640302	641003	702
5849	5	Pseudomonas sp. SWI36 SWI36_1	77227632	SEIS01_1770002	CDS	automatic/finished	ung	uracil-DNA glycosylase	3.2.2.27	no						no		2020-07-15	3	4686717	4687409	693
5849	5	Pseudomonas sp. SWI36 SWI36_2	77222038	SEIQ01_1720028	CDS	automatic/finished	ung	uracil-DNA glycosylase	3.2.2.27	no						no		2020-07-15	-2	4707087	4707779	693
5876	5	Bacillus albus PFYN01	93128465	SEIR01_290015	CDS	automatic/finished	tsaE	tRNA(NNU) t(6)A37 threonylcarbamoyladenosine modification; ADP binding protein		no	e : enzyme			16.2 : Construct biomass (Anabolism) ;	12682299, 17005971, 19246765, 19376873, 19578062, 20701780, 20824107, 21183954, 21285948, 22378793, 23072323	no	2a : Function from experimental evidences in other organisms	2022-01-17	-2	789652	790125	474
5876	5	Bacillus thuringiensis C15	93120959	SEIU01_1080014	CDS	automatic/finished	tsaE	tRNA(NNU) t(6)A37 threonylcarbamoyladenosine modification; ADP binding protein		no	e : enzyme			16.2 : Construct biomass (Anabolism) ;	12682299, 17005971, 19246765, 19376873, 19578062, 20701780, 20824107, 21183954, 21285948, 22378793, 23072323	no	2a : Function from experimental evidences in other organisms	2022-01-17	-2	4595298	4595771	474
5876	5	Pseudomonas sp. B10	93123454	SEIT01_320185	CDS	automatic/finished	tsaE	N(6)-L-threonylcarbamoyladenine synthase, TsaE subunit	2.3.1.234	no						no		2022-01-17	3	1919208	1919678	471
5876	5	Pseudomonas sp. SWI36 SWI36_1	77227400	SEIS01_1710011	CDS	automatic/finished	tsaE	N(6)-L-threonylcarbamoyladenine synthase, TsaE subunit	2.3.1.234	no						no		2020-07-15	-2	4434672	4435145	474
5876	5	Pseudomonas sp. SWI36 SWI36_2	77222310	SEIQ01_1800011	CDS	automatic/finished	tsaE	N(6)-L-threonylcarbamoyladenine synthase, TsaE subunit	2.3.1.234	no						no		2020-07-15	-2	5002731	5003204	474
5905	5	Bacillus albus PFYN01	93127718	SEIR01_10157	CDS	automatic/finished	cstA	carbon starvation protein A		no						no		2022-01-17	-3	152238	154313	2076
5905	5	Bacillus thuringiensis C15	93116553	SEIU01_20120	CDS	automatic/finished	cstA	carbon starvation protein A		no						no		2022-01-17	-3	372899	374974	2076
5905	5	Pseudomonas sp. B10	93122058	SEIT01_20041	CDS	automatic/finished	btsT	pyruvate:H(+) symporter		no						no		2022-01-17	1	393394	395460	2067
5905	5	Pseudomonas sp. SWI36 SWI36_1	77225586	SEIS01_1340021	CDS	automatic/finished	btsT	pyruvate:H(+) symporter		no						no		2020-07-15	-3	2500340	2502406	2067
5905	5	Pseudomonas sp. SWI36 SWI36_2	77219997	SEIQ01_1290036	CDS	automatic/finished	btsT	pyruvate:H(+) symporter		no						no		2020-07-15	2	2574482	2576548	2067
5924	5	Bacillus albus PFYN01	93133809	SEIR01_4450076	CDS	automatic/finished		protein of unknown function		no	u : unknown	1 : Unknown				no	5 : Unknown function	2022-01-17	-2	5680390	5680533	144
5924	5	Bacillus thuringiensis C15	93121144	SEIU01_1180030	CDS	automatic/finished		DUF2292 domain-containing protein		no						no		2022-01-17	1	4754665	4754808	144
5924	5	Pseudomonas sp. B10	93125446	SEIT01_580015	CDS	automatic/finished		DUF2292 domain-containing protein		no						no		2022-01-17	-3	4036939	4037121	183
5924	5	Pseudomonas sp. SWI36 SWI36_1	77226314	SEIS01_1460006	CDS	automatic/finished		conserved protein of unknown function		no	u : unknown	1 : Unknown				no	4 : Unknown function but conserved in other organisms	2020-07-15	3	3242415	3242597	183
5924	5	Pseudomonas sp. SWI36 SWI36_2	77220612	SEIQ01_1400006	CDS	automatic/finished		conserved protein of unknown function		no	u : unknown	1 : Unknown				no	4 : Unknown function but conserved in other organisms	2020-07-15	3	3214143	3214325	183
5973	5	Bacillus albus PFYN01	93132099	SEIR01_3010039	CDS	automatic/finished		DUF523 domain-containing protein		no	u : unknown					no	4 : Unknown function but conserved in other organisms	2022-01-17	1	4088668	4089129	462
5973	5	Bacillus thuringiensis C15	93117038	SEIU01_350075	CDS	automatic/finished		DUF523 domain-containing protein		no	u : unknown					no	4 : Unknown function but conserved in other organisms	2022-01-17	-1	856207	856668	462
5973	5	Pseudomonas sp. B10	93121989	SEIT01_10295	CDS	automatic/finished		DUF523 domain-containing protein		no						no		2022-01-17	-1	321843	322328	486
5973	5	Pseudomonas sp. SWI36 SWI36_1	77226330	SEIS01_1460022	CDS	automatic/finished		Purine nucleoside phosphorylase	2.4.2.1	no						no		2020-07-15	2	3258236	3258739	504
5973	5	Pseudomonas sp. SWI36 SWI36_2	77220628	SEIQ01_1400022	CDS	automatic/finished		Purine nucleoside phosphorylase	2.4.2.1	no						no		2020-07-15	2	3229964	3230467	504
6009	5	Bacillus albus PFYN01	93129379	SEIR01_790016	CDS	automatic/finished	opuD	Glycine betaine transporter OpuD		no						no		2022-01-17	-3	1598418	1599968	1551
6009	5	Bacillus albus PFYN01	93130002	SEIR01_1130026	CDS	automatic/finished	opuD	glycine betaine transporter		no	t : transporter			16.1 : Circulate ; 16.8 : Protect ;	14996799, 15849754, 16850406, 8752321, 9925583	no	2a : Function from experimental evidences in other organisms	2022-01-17	1	2198959	2200473	1515
6009	5	Bacillus thuringiensis C15	93118828	SEIU01_630228	CDS	automatic/finished	opuD	glycine betaine transporter		no	t : transporter			16.1 : Circulate ; 16.8 : Protect ;	14996799, 15849754, 16850406, 8752321, 9925583	no	2a : Function from experimental evidences in other organisms	2022-01-17	-2	2538006	2539520	1515
6009	5	Bacillus thuringiensis C15	93121571	SEIU01_1290127	CDS	automatic/finished	opuD	Glycine betaine transporter OpuD		no						no		2022-01-17	1	5168995	5170545	1551
6009	5	Pseudomonas sp. B10	93121839	SEIT01_10145	CDS	automatic/finished	betT	choline:H(+) symporter		no						no		2022-01-17	-2	164561	166558	1998
6009	5	Pseudomonas sp. B10	93125391	SEIT01_570006	CDS	automatic/finished	betT	Osmo-dependent choline transporter BetT2		no						no		2022-01-17	-3	3976405	3978405	2001
6009	5	Pseudomonas sp. SWI36 SWI36_1	77226107	SEIS01_1420012	CDS	automatic/finished	betT	choline:H(+) symporter		no						no		2020-07-15	-3	3036902	3038905	2004
6009	5	Pseudomonas sp. SWI36 SWI36_1	77226771	SEIS01_1540016	CDS	automatic/finished	betT	Osmo-dependent choline transporter BetT2		no						no		2020-07-15	3	3716616	3718619	2004
6009	5	Pseudomonas sp. SWI36 SWI36_1	77227003	SEIS01_1600011	CDS	automatic/finished		Glycine betaine transporter		no						no		2020-07-15	-1	3958876	3960849	1974
6009	5	Pseudomonas sp. SWI36 SWI36_1	77227782	SEIS01_1820013	CDS	automatic/finished	betP	Glycine betaine transporter BetP		no						no		2020-07-15	2	4849337	4851082	1746
6009	5	Pseudomonas sp. SWI36 SWI36_2	77219929	SEIQ01_1280012	CDS	automatic/finished	betT	choline:H(+) symporter		no						no		2020-07-15	-3	2487104	2489107	2004
6009	5	Pseudomonas sp. SWI36 SWI36_2	77221127	SEIQ01_1500025	CDS	automatic/finished	betT	Osmo-dependent choline transporter BetT2		no						no		2020-07-15	-2	3755796	3757799	2004
6009	5	Pseudomonas sp. SWI36 SWI36_2	77221845	SEIQ01_1660075	CDS	automatic/finished		Glycine betaine transporter		no						no		2020-07-15	3	4501854	4503827	1974
6009	5	Pseudomonas sp. SWI36 SWI36_2	77222570	SEIQ01_1880079	CDS	automatic/finished	betP	Glycine betaine transporter BetP		no						no		2020-07-15	-2	5279958	5281703	1746
6033	5	Bacillus albus PFYN01	93129156	SEIR01_660010	CDS	automatic/finished	yhfO	putative N-acetyltransferase	2.3.1.-	no	e : enzyme			16.6 : Maintain ; 16.8 : Protect ;	11717295	no	3 : Putative function from multiple computational evidences	2022-01-17	1	1407109	1407597	489
6033	5	Bacillus thuringiensis C15	93117084	SEIU01_380001	CDS	automatic/finished	yhfO	putative N-acetyltransferase	2.3.1.-	no	e : enzyme			16.6 : Maintain ; 16.8 : Protect ;	11717295	no	3 : Putative function from multiple computational evidences	2022-01-17	-3	907511	907999	489
6033	5	Pseudomonas sp. B10	93125836	SEIT01_650078	CDS	automatic/finished		N-acetyltransferase		no						no		2022-01-17	1	4446793	4447254	462
6033	5	Pseudomonas sp. B10	93127146	SEIT01_980133	CDS	automatic/finished	yhfO	Uncharacterized N-acetyltransferase YhfO	2.3.1.-	no						no		2022-01-17	1	5842114	5842572	459
6033	5	Pseudomonas sp. SWI36 SWI36_1	77228435	SEIS01_2040016	CDS	automatic/finished		Histone acetyltransferase HPA2 and related acetyltransferases		no						no		2020-07-15	-1	5549650	5550108	459
6033	5	Pseudomonas sp. SWI36 SWI36_2	77218554	SEIQ01_350060	CDS	automatic/finished		Histone acetyltransferase HPA2 and related acetyltransferases		no						no		2020-07-15	1	1072027	1072485	459
6047	5	Bacillus albus PFYN01	93128535	SEIR01_350002	CDS	automatic/finished	dnaG	DNA primase	2.7.7.-	no	e : enzyme			16.9 : Replicate ;	3100394, 9387153, 12682299, 16036556, 28386108	no	2a : Function from experimental evidences in other organisms	2022-01-17	-2	856207	858003	1797
6047	5	Bacillus thuringiensis C15	93118007	SEIU01_530049	CDS	automatic/finished	dnaG	DNA primase	2.7.7.-	no	e : enzyme			16.9 : Replicate ;	3100394, 9387153, 12682299, 16036556, 28386108	no	2a : Function from experimental evidences in other organisms	2022-01-17	3	1757493	1759289	1797
6047	5	Pseudomonas sp. B10	93121745	SEIT01_10051	CDS	automatic/finished	dnaG	DNA primase	2.7.7.101	no						no		2022-01-17	1	52273	54240	1968
6047	5	Pseudomonas sp. SWI36 SWI36_1	77226640	SEIS01_1510013	CDS	automatic/finished	dnaG	DNA primase	2.7.7.-	no						no		2020-07-15	1	3576376	3578358	1983
6047	5	Pseudomonas sp. SWI36 SWI36_2	77220727	SEIQ01_1420028	CDS	automatic/finished	dnaG	DNA primase	2.7.7.-	no						no		2020-07-15	-2	3336180	3338162	1983
606	5	Bacillus albus PFYN01	93130346	SEIR01_1360002	CDS	automatic/finished	sndB	N-acetyl-sulfur-metabolite deacetylase	3.5.-.-	no	e : enzyme			16.11 : Scavenge (Catabolism) ;	12193636, 16513748, 16885442, 23944997, 28032445, 29626092	no	2a : Function from experimental evidences in other organisms	2022-01-17	2	2504297	2505442	1146
606	5	Bacillus albus PFYN01	93130472	SEIR01_1460044	CDS	automatic/finished		amidohydrolase	3.5.1.-	no						no		2022-01-17	2	2612162	2613337	1176
606	5	Bacillus albus PFYN01	93133258	SEIR01_4310015	CDS	automatic/finished	amaA	Amidohydrolase	3.5.1.14	no						no		2022-01-17	-2	5178454	5179623	1170
606	5	Bacillus thuringiensis C15	93117199	SEIU01_460103	CDS	automatic/finished		Amidohydrolase		no						no		2022-01-17	3	1012815	1013984	1170
606	5	Bacillus thuringiensis C15	93118930	SEIU01_650034	CDS	automatic/finished	sndB	N-acetyl-sulfur-metabolite deacetylase	3.5.-.-	no	e : enzyme			16.11 : Scavenge (Catabolism) ;	12193636, 16513748, 16885442, 23944997, 28032445, 29626092	no	2a : Function from experimental evidences in other organisms	2022-01-17	-2	2643852	2644997	1146
606	5	Bacillus thuringiensis C15	93119066	SEIU01_680014	CDS	automatic/finished		amidohydrolase	3.5.1.-	no						no		2022-01-17	-2	2775306	2776481	1176
606	5	Pseudomonas sp. B10	93127215	SEIT01_1030004	CDS	automatic/finished	hipO	Hippurate hydrolase	3.5.1.32	no						no		2022-01-17	2	5911271	5912446	1176
606	5	Pseudomonas sp. SWI36 SWI36_1	77223657	SEIS01_130026	CDS	automatic/finished	hipO	Hippurate hydrolase	3.5.1.32	no						no		2020-07-15	2	528812	529996	1185
606	5	Pseudomonas sp. SWI36 SWI36_2	77218732	SEIQ01_460060	CDS	automatic/finished	hipO	Hippurate hydrolase	3.5.1.32	no						no		2020-07-15	-3	1255730	1256914	1185
6065	5	Bacillus albus PFYN01	93133893	SEIR01_4480008	CDS	automatic/finished	anmK	Anhydro-N-acetylmuramic acid kinase	2.7.1.170	no						no		2022-01-17	1	5763466	5764638	1173
6065	5	Bacillus thuringiensis C15	93119312	SEIU01_730030	CDS	automatic/finished	anmK	Anhydro-N-acetylmuramic acid kinase	2.7.1.170	no						no		2022-01-17	-2	2991150	2992322	1173
6065	5	Pseudomonas sp. B10	93121697	SEIT01_10003	CDS	automatic/finished	anmK	anhydro-N-acetylmuramic acid kinase	2.7.1.170	no						no		2022-01-17	1	3064	4155	1092
6065	5	Pseudomonas sp. SWI36 SWI36_1	77227137	SEIS01_1620033	CDS	automatic/finished	anmK	anhydro-N-acetylmuramic acid kinase	2.7.1.170	no						no		2020-07-15	-3	4131710	4132801	1092
6065	5	Pseudomonas sp. SWI36 SWI36_2	77221523	SEIQ01_1580033	CDS	automatic/finished	anmK	anhydro-N-acetylmuramic acid kinase	2.7.1.170	no						no		2020-07-15	-3	4158164	4159255	1092
6085	5	Bacillus albus PFYN01	93128086	SEIR01_130070	CDS	automatic/finished	yjdM	zinc ribbon domain-containing protein YjdM		no						no		2022-01-17	1	465838	466179	342
6085	5	Bacillus albus PFYN01	93129252	SEIR01_700001	CDS	automatic/finished	yjdM	zinc ribbon domain-containing protein YjdM		no						no		2022-01-17	2	1495586	1495927	342
6085	5	Bacillus thuringiensis C15	93117026	SEIU01_350063	CDS	automatic/finished	yjdM	zinc ribbon domain-containing protein YjdM		no						no		2022-01-17	2	848204	848545	342
6085	5	Bacillus thuringiensis C15	93117393	SEIU01_480067	CDS	automatic/finished	yjdM	zinc ribbon domain-containing protein YjdM		no						no		2022-01-17	-1	1196701	1197042	342
6085	5	Pseudomonas sp. B10	93122079	SEIT01_20062	CDS	automatic/finished	yjdM	zinc ribbon domain-containing protein YjdM		no						no		2022-01-17	-3	419599	419940	342
6085	5	Pseudomonas sp. SWI36 SWI36_1	77223970	SEIS01_260007	CDS	automatic/finished	yjdM	Protein YjdM		no						no		2020-07-15	1	837604	837945	342
6085	5	Pseudomonas sp. SWI36 SWI36_2	77221747	SEIQ01_1650013	CDS	automatic/finished	yjdM	Protein YjdM		no						no		2020-07-15	-3	4386941	4387282	342
6096	5	Bacillus albus PFYN01	93129532	SEIR01_900026	CDS	automatic/finished	phnX	Phosphonoacetaldehyde hydrolase	3.11.1.1	no						no		2022-01-17	-2	1756423	1757217	795
6096	5	Bacillus thuringiensis C15	93117150	SEIU01_460054	CDS	automatic/finished	phnX	Phosphonoacetaldehyde hydrolase	3.11.1.1	no						no		2022-01-17	3	971706	972500	795
6096	5	Pseudomonas sp. B10	93125120	SEIT01_530057	CDS	automatic/finished	phnX	Phosphonoacetaldehyde hydrolase	3.11.1.1	no						no		2022-01-17	-1	3666060	3666887	828
6096	5	Pseudomonas sp. SWI36 SWI36_1	77223825	SEIS01_210001	CDS	automatic/finished	phnX	Phosphonoacetaldehyde hydrolase	3.11.1.1	no						no		2020-07-15	-3	694427	695254	828
6096	5	Pseudomonas sp. SWI36 SWI36_2	77218295	SEIQ01_230001	CDS	automatic/finished	phnX	Phosphonoacetaldehyde hydrolase	3.11.1.1	no						no		2020-07-15	-1	764236	765063	828
6098	5	Bacillus albus PFYN01	93129531	SEIR01_900025	CDS	automatic/finished	phnW	2-aminoethylphosphonate--pyruvate transaminase	2.6.1.37	no						no		2022-01-17	-2	1755310	1756407	1098
6098	5	Bacillus thuringiensis C15	93117151	SEIU01_460055	CDS	automatic/finished	phnW	2-aminoethylphosphonate--pyruvate transaminase	2.6.1.37	no						no		2022-01-17	3	972516	973613	1098
6098	5	Pseudomonas sp. B10	93125121	SEIT01_530058	CDS	automatic/finished	phnW	2-aminoethylphosphonate--pyruvate transaminase	2.6.1.37	no						no		2022-01-17	-2	3666959	3668068	1110
6098	5	Pseudomonas sp. SWI36 SWI36_1	77223826	SEIS01_210002	CDS	automatic/finished	phnW	2-aminoethylphosphonate--pyruvate transaminase	2.6.1.37	no						no		2020-07-15	-2	695289	696395	1107
6098	5	Pseudomonas sp. SWI36 SWI36_2	77218296	SEIQ01_230002	CDS	automatic/finished	phnW	2-aminoethylphosphonate--pyruvate transaminase	2.6.1.37	no						no		2020-07-15	-3	765098	766204	1107
6105	5	Bacillus albus PFYN01	93133917	SEIR01_4490003	CDS	automatic/finished		oxidoreductase	1.1.1.-	no						no		2022-01-17	2	5781395	5782054	660
6105	5	Bacillus thuringiensis C15	93117476	SEIU01_490047	CDS	automatic/finished		oxidoreductase	1.1.1.-	no						no		2022-01-17	1	1271035	1271694	660
6105	5	Pseudomonas sp. B10	93125825	SEIT01_650067	CDS	automatic/finished	yraR	putative nucleoside-diphosphate-sugar epimerase		no						no	3 : Putative function from multiple computational evidences	2022-01-17	1	4432975	4433616	642
6105	5	Pseudomonas sp. SWI36 SWI36_1	77228444	SEIS01_2040025	CDS	automatic/finished	yraR	Putative NAD(P)-binding protein YraR		no						no	3 : Putative function from multiple computational evidences	2020-07-15	-1	5560384	5561028	645
6105	5	Pseudomonas sp. SWI36 SWI36_2	77218545	SEIQ01_350051	CDS	automatic/finished	yraR	Putative NAD(P)-binding protein YraR		no						no	3 : Putative function from multiple computational evidences	2020-07-15	1	1061107	1061751	645
6136	5	Bacillus albus PFYN01	93129880	SEIR01_1120054	CDS	automatic/finished	yfjO	putative RNA methyltransferase	2.1.1.-	no	e : enzyme			16.6 : Maintain ; 16.8 : Protect ;		no	3 : Putative function from multiple computational evidences	2022-01-17	-3	2073840	2075219	1380
6136	5	Bacillus albus PFYN01	93130696	SEIR01_1680011	CDS	automatic/finished	rlmCD	methyltransferase of m5U747 and m5U1939 in 23S RNA	2.1.1.189, 2.1.1.190	no	e : enzyme			16.6 : Maintain ; 16.8 : Protect ;	21824914	no	2a : Function from experimental evidences in other organisms	2022-01-17	-1	2815379	2816755	1377
6136	5	Bacillus thuringiensis C15	93119908	SEIU01_850047	CDS	automatic/finished	rlmCD	methyltransferase of m5U747 and m5U1939 in 23S RNA	2.1.1.189, 2.1.1.190	no	e : enzyme			16.6 : Maintain ; 16.8 : Protect ;	21824914	no	2a : Function from experimental evidences in other organisms	2022-01-17	2	3589073	3590449	1377
6136	5	Bacillus thuringiensis C15	93120017	SEIU01_850156	CDS	automatic/finished	yfjO	putative RNA methyltransferase	2.1.1.-	no	e : enzyme			16.6 : Maintain ; 16.8 : Protect ;		no	3 : Putative function from multiple computational evidences	2022-01-17	3	3705312	3706691	1380
6136	5	Pseudomonas sp. B10	93122041	SEIT01_20024	CDS	automatic/finished	trmA	tRNA/tmRNA (uracil-C(5))-methyltransferase	2.1.1.-, 2.1.1.35	no						no		2022-01-17	-2	377240	378319	1080
6136	5	Pseudomonas sp. B10	93125973	SEIT01_660025	CDS	automatic/finished	rlmD	23S rRNA m(5)U1939 methyltransferase	2.1.1.190	no						no		2022-01-17	3	4574493	4575878	1386
6136	5	Pseudomonas sp. SWI36 SWI36_1	77225601	SEIS01_1340036	CDS	automatic/finished	trmA	tRNA m(5)U54 methyltransferase	2.1.1.35	no						no		2020-07-15	3	2515728	2516813	1086
6136	5	Pseudomonas sp. SWI36 SWI36_1	77227174	SEIS01_1640002	CDS	automatic/finished	rlmD	23S rRNA (uracil(1939)-C(5))-methyltransferase RlmD	2.1.1.190	no						no		2020-07-15	2	4174721	4176079	1359
6136	5	Pseudomonas sp. SWI36 SWI36_2	77219983	SEIQ01_1290022	CDS	automatic/finished	trmA	tRNA m(5)U54 methyltransferase	2.1.1.35	no						no		2020-07-15	-1	2560075	2561160	1086
6136	5	Pseudomonas sp. SWI36 SWI36_2	77221611	SEIQ01_1610002	CDS	automatic/finished	rlmD	23S rRNA (uracil(1939)-C(5))-methyltransferase RlmD	2.1.1.190	no						no		2020-07-15	3	4238418	4239776	1359
6137	5	Bacillus albus PFYN01	93130060	SEIR01_1160003	CDS	automatic/finished	pbuG	hypoxanthine/guanine permease		no	t : transporter			16.1 : Circulate ;	3110131, 11591660, 12923093, 15849754, 16850406, 19446032	no	2a : Function from experimental evidences in other organisms	2022-01-17	-3	2254803	2256128	1326
6137	5	Bacillus albus PFYN01	93130458	SEIR01_1460030	CDS	automatic/finished	pbuO	hypoxanthine/guanine permease		no	t : transporter			16.1 : Circulate ;	11591660, 12923093, 15849754, 16850406, 19446032, 28583948	no	2a : Function from experimental evidences in other organisms	2022-01-17	2	2600510	2601790	1281
6137	5	Bacillus albus PFYN01	93134113	SEIR01_4560027	CDS	automatic/finished	pbuO	hypoxanthine/guanine permease		no	t : transporter			16.1 : Circulate ;	11591660, 12923093, 15849754, 16850406, 19446032, 28583948	no	2a : Function from experimental evidences in other organisms	2022-01-17	-2	5956561	5957862	1302
6137	5	Bacillus thuringiensis C15	93117709	SEIU01_520025	CDS	automatic/finished	pbuO	hypoxanthine/guanine permease		no	t : transporter			16.1 : Circulate ;	11591660, 12923093, 15849754, 16850406, 19446032, 28583948	no	2a : Function from experimental evidences in other organisms	2022-01-17	-2	1492059	1493360	1302
6137	5	Bacillus thuringiensis C15	93119080	SEIU01_680028	CDS	automatic/finished	pbuO	hypoxanthine/guanine permease		no	t : transporter			16.1 : Circulate ;	11591660, 12923093, 15849754, 16850406, 19446032, 28583948	no	2a : Function from experimental evidences in other organisms	2022-01-17	-2	2788407	2789699	1293
6137	5	Bacillus thuringiensis C15	93120948	SEIU01_1080003	CDS	automatic/finished	pbuG	hypoxanthine/guanine permease		no	t : transporter			16.1 : Circulate ;	3110131, 11591660, 12923093, 15849754, 16850406, 19446032	no	2a : Function from experimental evidences in other organisms	2022-01-17	-1	4582960	4584285	1326
6137	5	Pseudomonas sp. B10	93122042	SEIT01_20025	CDS	automatic/finished	adeP	adenine:H(+) symporter		no						no		2022-01-17	-3	378316	379611	1296
6137	5	Pseudomonas sp. B10	93123781	SEIT01_360040	CDS	automatic/finished	adeP	Adenine permease AdeP		no						no		2022-01-17	-2	2255351	2256700	1350
6137	5	Pseudomonas sp. SWI36 SWI36_1	77225600	SEIS01_1340035	CDS	automatic/finished	adeP	adenine:H(+) symporter		no						no		2020-07-15	1	2514436	2515731	1296
6137	5	Pseudomonas sp. SWI36 SWI36_1	77227389	SEIS01_1700032	CDS	automatic/finished	adeP	Adenine permease AdeP		no						no		2020-07-15	2	4419797	4421146	1350
6137	5	Pseudomonas sp. SWI36 SWI36_2	77219984	SEIQ01_1290023	CDS	automatic/finished	adeP	adenine:H(+) symporter		no						no		2020-07-15	-2	2561157	2562452	1296
6137	5	Pseudomonas sp. SWI36 SWI36_2	77221888	SEIQ01_1670032	CDS	automatic/finished	adeP	Adenine permease AdeP		no						no		2020-07-15	3	4548975	4550324	1350
6147	5	Bacillus albus PFYN01	93127717	SEIR01_10156	CDS	automatic/finished		Cytosolic protein		no						no		2022-01-17	-1	152042	152245	204
6147	5	Bacillus thuringiensis C15	93116552	SEIU01_20119	CDS	automatic/finished		Cytosolic protein		no						no		2022-01-17	-1	372703	372906	204
6147	5	Pseudomonas sp. B10	93122059	SEIT01_20042	CDS	automatic/finished	ybdD	PF04328 family protein YbdD		no						no		2022-01-17	1	395476	395673	198
6147	5	Pseudomonas sp. B10	93126904	SEIT01_900020	CDS	automatic/finished	ybdD	PF04328 family protein YbdD		no						no		2022-01-17	-3	5587687	5587887	201
6147	5	Pseudomonas sp. SWI36 SWI36_1	77225585	SEIS01_1340020	CDS	automatic/finished		Putative small protein yjiX		no						no	3 : Putative function from multiple computational evidences	2020-07-15	-2	2500125	2500322	198
6147	5	Pseudomonas sp. SWI36 SWI36_2	77219998	SEIQ01_1290037	CDS	automatic/finished		Putative small protein yjiX		no						no	3 : Putative function from multiple computational evidences	2020-07-15	1	2576566	2576763	198
6194	5	Bacillus albus PFYN01	93133824	SEIR01_4450091	CDS	automatic/finished	hisG	ATP phosphoribosyltransferase	2.4.2.17	no	e : enzyme				10430882, 12269828, 12511575, 14741209, 15660995, 17154531, 21774583, 22989207, 28092443, 28872824	no	2a : Function from experimental evidences in other organisms	2022-01-17	-3	5693031	5693666	636
6194	5	Bacillus thuringiensis C15	93121129	SEIU01_1180015	CDS	automatic/finished	hisG	ATP phosphoribosyltransferase	2.4.2.17	no	e : enzyme				10430882, 12269828, 12511575, 14741209, 15660995, 17154531, 21774583, 22989207, 28092443, 28872824	no	2a : Function from experimental evidences in other organisms	2022-01-17	2	4741532	4742167	636
6194	5	Pseudomonas sp. B10	93124290	SEIT01_430009	CDS	automatic/finished	hisG	ATP phosphoribosyltransferase	2.4.2.17	no						no		2022-01-17	-3	2789863	2790498	636
6194	5	Pseudomonas sp. SWI36 SWI36_1	77224754	SEIS01_790074	CDS	automatic/finished	hisG	ATP phosphoribosyltransferase	2.4.2.17	no						no		2020-07-15	3	1690953	1691588	636
6194	5	Pseudomonas sp. SWI36 SWI36_2	77219319	SEIQ01_1010003	CDS	automatic/finished	hisG	ATP phosphoribosyltransferase	2.4.2.17	no						no		2020-07-15	-2	1883235	1883870	636
628	5	Bacillus albus PFYN01	93127889	SEIR01_50010	CDS	automatic/finished	pagR	Transcriptional repressor PagR		no						no		2022-01-17	-3	297690	297983	294
628	5	Bacillus albus PFYN01	93127949	SEIR01_90001	CDS	automatic/finished		Transcriptional regulator		no						no		2022-01-17	2	348920	349225	306
628	5	Bacillus albus PFYN01	93129077	SEIR01_600003	CDS	automatic/finished	pagR	Transcriptional repressor PagR		no						no		2022-01-17	-2	1336654	1336947	294
628	5	Bacillus albus PFYN01	93131237	SEIR01_2190003	CDS	automatic/finished		Helix-turn-helix transcriptional regulator		no						no		2022-01-17	3	3319410	3319709	300
628	5	Bacillus albus PFYN01	93131871	SEIR01_2760001	CDS	automatic/finished		Uncharacterized HTH-type transcriptional regulator MT0088		no						no		2022-01-17	2	3888629	3888982	354
628	5	Bacillus albus PFYN01	93133033	SEIR01_4240002	CDS	automatic/finished	pagR	Transcriptional repressor PagR		no						no		2022-01-17	2	4962476	4962766	291
628	5	Bacillus albus PFYN01	93133587	SEIR01_4390013	CDS	automatic/finished		Winged helix-turn-helix transcriptional regulator		no						no		2022-01-17	-3	5474067	5474390	324
628	5	Bacillus albus PFYN01	93133634	SEIR01_4410003	CDS	automatic/finished	ziaR	Transcriptional repressor SmtB homolog		no						no		2022-01-17	2	5513993	5514370	378
628	5	Bacillus albus PFYN01	93133650	SEIR01_4410019	CDS	automatic/finished	pagR	Transcriptional repressor PagR		no						no		2022-01-17	2	5533757	5534044	288
628	5	Bacillus albus PFYN01	93133960	SEIR01_4500020	CDS	automatic/finished	pagR	Transcriptional repressor PagR		no						no		2022-01-17	-3	5817735	5818010	276
628	5	Bacillus albus PFYN01	93134474	SEIR01_4670037	CDS	automatic/finished	sdpR	transcriptional regulator of SdpC synthesis operon (ArsR family)		no	r : regulator			16.3 : Control ;	12817086, 17069462, 23687264	no	2a : Function from experimental evidences in other organisms	2022-01-17	2	6275207	6275479	273
628	5	Bacillus albus PFYN01	93134699	SEIR01_4750013	CDS	automatic/finished	arsR	transcriptional regulator (ArsR-arsenate); skin element		no	r : regulator			16.3 : Control ;	9537360, 16430705, 19632156	no	2a : Function from experimental evidences in other organisms	2022-01-17	-2	6464794	6465099	306
628	5	Bacillus thuringiensis C15	93116823	SEIU01_230005	CDS	automatic/finished		Transcriptional repressor		no						no		2022-01-17	-1	644497	644877	381
628	5	Bacillus thuringiensis C15	93117282	SEIU01_470068	CDS	automatic/finished	sdpR	transcriptional regulator of SdpC synthesis operon (ArsR family)		no	r : regulator			16.3 : Control ;	12817086, 17069462, 23687264	no	2a : Function from experimental evidences in other organisms	2022-01-17	-1	1073719	1073991	273
628	5	Bacillus thuringiensis C15	93117396	SEIU01_480070	CDS	automatic/finished		Uncharacterized HTH-type transcriptional regulator MT0088		no						no		2022-01-17	-3	1199612	1199965	354
628	5	Bacillus thuringiensis C15	93117424	SEIU01_480098	CDS	automatic/finished	pagR	Transcriptional repressor PagR		no						no		2022-01-17	-3	1221992	1222267	276
628	5	Bacillus thuringiensis C15	93118042	SEIU01_530084	CDS	automatic/finished	pagR	Transcriptional repressor PagR		no						no		2022-01-17	-3	1790519	1790809	291
628	5	Bacillus thuringiensis C15	93119260	SEIU01_720022	CDS	automatic/finished		Winged helix-turn-helix transcriptional regulator		no						no		2022-01-17	-1	2948872	2949195	324
628	5	Bacillus thuringiensis C15	93120728	SEIU01_1060005	CDS	automatic/finished	arsR	transcriptional regulator (ArsR-arsenate); skin element		no	r : regulator			16.3 : Control ;	9537360, 16430705, 19632156	no	2a : Function from experimental evidences in other organisms	2022-01-17	2	4376468	4376773	306
628	5	Bacillus thuringiensis C15	93121410	SEIU01_1260004	CDS	automatic/finished	pagR	Transcriptional repressor PagR		no						no		2022-01-17	1	4993888	4994187	300
628	5	Bacillus thuringiensis C15	93121513	SEIU01_1290069	CDS	automatic/finished	pagR	Transcriptional repressor PagR		no						no		2022-01-17	-2	5098875	5099162	288
628	5	Bacillus thuringiensis C15	93121529	SEIU01_1290085	CDS	automatic/finished	ziaR	Transcriptional repressor SmtB homolog		no						no		2022-01-17	-1	5118397	5118774	378
628	5	Pseudomonas sp. B10	93126050	SEIT01_680031	CDS	automatic/finished	bigR	Biofilm growth-associated repressor		no						no		2022-01-17	1	4663057	4663395	339
628	5	Pseudomonas sp. B10	93126722	SEIT01_870043	CDS	automatic/finished	arsR	Arsenic resistance transcriptional regulator ArsR2		no						no		2022-01-17	1	5395327	5395674	348
628	5	Pseudomonas sp. SWI36 SWI36_1	77223671	SEIS01_130040	CDS	automatic/finished	arsR	Arsenic resistance transcriptional regulator ArsR2		no						no		2020-07-15	-1	540418	540765	348
628	5	Pseudomonas sp. SWI36 SWI36_1	77225038	SEIS01_1120040	CDS	automatic/finished	arsR	Arsenic resistance transcriptional regulator ArsR1		no						no		2020-07-15	-1	1955116	1955472	357
628	5	Pseudomonas sp. SWI36 SWI36_2	77218718	SEIQ01_460046	CDS	automatic/finished	arsR	Arsenic resistance transcriptional regulator ArsR2		no						no		2020-07-15	3	1244961	1245308	348
628	5	Pseudomonas sp. SWI36 SWI36_2	77219532	SEIQ01_1120125	CDS	automatic/finished	arsR	Arsenic resistance transcriptional regulator ArsR1		no						no		2020-07-15	3	2091792	2092148	357
6303	5	Bacillus albus PFYN01	93133207	SEIR01_4290009	CDS	automatic/finished		polyphosphate kinase (ADP)	2.7.4.-	no						no		2022-01-17	-2	5122546	5123349	804
6303	5	Bacillus thuringiensis C15	93116309	SEIU01_10138	CDS	automatic/finished		polyphosphate kinase (ADP)	2.7.4.-	no						no		2022-01-17	3	122331	123134	804
6303	5	Pseudomonas sp. B10	93126300	SEIT01_760031	CDS	automatic/finished		Polyphosphate:AMP phosphotransferase	2.7.4.33	no						no		2022-01-17	1	4959154	4960668	1515
6303	5	Pseudomonas sp. SWI36 SWI36_1	77224605	SEIS01_680039	CDS	automatic/finished		Polyphosphate:AMP phosphotransferase	2.7.4.33	no						no		2020-07-15	-2	1525341	1526834	1494
6303	5	Pseudomonas sp. SWI36 SWI36_2	77219268	SEIQ01_900039	CDS	automatic/finished		Polyphosphate:AMP phosphotransferase	2.7.4.33	no						no		2020-07-15	-2	1830120	1831613	1494
632	5	Bacillus albus PFYN01	93129131	SEIR01_640003	CDS	automatic/finished		putative Homoserine/homoserine lactone efflux protein		no						no	3 : Putative function from multiple computational evidences	2022-01-17	-2	1380328	1380960	633
632	5	Bacillus thuringiensis C15	93120991	SEIU01_1110001	CDS	automatic/finished		Threonine/homoserine/homoserine lactone efflux protein		no						no		2022-01-17	-2	4626348	4626980	633
632	5	Pseudomonas sp. B10	93123556	SEIT01_340003	CDS	automatic/finished		homoserine/homoserine lactone efflux protein		no						no		2022-01-17	3	2031006	2031644	639
632	5	Pseudomonas sp. SWI36 SWI36_1	77227805	SEIS01_1820036	CDS	automatic/finished		Amino acid transporter LysE		no						no		2020-07-15	-1	4872391	4873023	633
632	5	Pseudomonas sp. SWI36 SWI36_2	77222547	SEIQ01_1880056	CDS	automatic/finished		Amino acid transporter LysE		no						no		2020-07-15	1	5258017	5258649	633
6334	5	Bacillus albus PFYN01	93128471	SEIR01_300005	CDS	automatic/finished	nadE	ammonium-dependent NAD+ synthetase	6.3.1.5	no	e : enzyme			16.2 : Construct biomass (Anabolism) ;	7890752, 9271869, 12682299, 19204287	no	2a : Function from experimental evidences in other organisms	2022-01-17	-1	793508	794326	819
6334	5	Bacillus thuringiensis C15	93117446	SEIU01_490017	CDS	automatic/finished	nadE	ammonium-dependent NAD+ synthetase	6.3.1.5	no	e : enzyme			16.2 : Construct biomass (Anabolism) ;	7890752, 9271869, 12682299, 19204287	no	2a : Function from experimental evidences in other organisms	2022-01-17	-2	1245519	1246337	819
6334	5	Pseudomonas sp. B10	93124093	SEIT01_400016	CDS	automatic/finished	nadE	NH3-dependent NAD(+) synthetase	6.3.1.5, 6.3.5.1	no						no		2022-01-17	-3	2566174	2567001	828
6334	5	Pseudomonas sp. SWI36 SWI36_1	77224216	SEIS01_420001	CDS	automatic/finished	nadE	NAD synthetase, NH3-dependent	6.3.1.5, 6.3.5.1	no						no		2020-07-15	-2	1107504	1108331	828
6334	5	Pseudomonas sp. SWI36 SWI36_2	77218613	SEIQ01_400001	CDS	automatic/finished	nadE	NAD synthetase, NH3-dependent	6.3.1.5, 6.3.5.1	no						no		2020-07-15	-1	1136977	1137804	828
6366	5	Bacillus albus PFYN01	93131396	SEIR01_2230142	CDS	automatic/finished	ccpA	transcriptional regulator of catabolite repression (Lacl family)		no	r : regulator			16.3 : Control ;	11931564, 14665673, 16316990, 17085448, 17827291, 18757537, 19202299, 22001508, 22512862, 23123903, 25157083, 26712933, 28617843	no	2a : Function from experimental evidences in other organisms	2022-01-17	-3	3456051	3457049	999
6366	5	Bacillus thuringiensis C15	93120934	SEIU01_1070196	CDS	automatic/finished	ccpA	transcriptional regulator of catabolite repression (Lacl family)		no	r : regulator			16.3 : Control ;	11931564, 14665673, 16316990, 17085448, 17827291, 18757537, 19202299, 22001508, 22512862, 23123903, 25157083, 26712933, 28617843	no	2a : Function from experimental evidences in other organisms	2022-01-17	-1	4568224	4569222	999
6366	5	Pseudomonas sp. B10	93124376	SEIT01_430095	CDS	automatic/finished	cra	Catabolite repressor/activator		no						no		2022-01-17	1	2881540	2882535	996
6366	5	Pseudomonas sp. B10	93124548	SEIT01_440055	CDS	automatic/finished	rbsR	DNA-binding transcriptional dual regulator RbsR		no						no		2022-01-17	-2	3066959	3067978	1020
6366	5	Pseudomonas sp. SWI36 SWI36_1	77226460	SEIS01_1490010	CDS	automatic/finished	purR	HTH-type transcriptional repressor PurR		no						no		2020-07-15	1	3390886	3391908	1023
6366	5	Pseudomonas sp. SWI36 SWI36_1	77227099	SEIS01_1610016	CDS	automatic/finished	cra	Catabolite repressor/activator		no						no		2020-07-15	3	4090917	4091912	996
6366	5	Pseudomonas sp. SWI36 SWI36_2	77217700	SEIQ01_10125	CDS	automatic/finished	purR	HTH-type transcriptional repressor PurR		no						no		2020-07-15	3	132366	133388	1023
6366	5	Pseudomonas sp. SWI36 SWI36_2	77222629	SEIQ01_1900015	CDS	automatic/finished	cra	Catabolite repressor/activator		no						no		2020-07-15	3	5335281	5336276	996
6367	5	Bacillus albus PFYN01	93133303	SEIR01_4320024	CDS	automatic/finished	fruK	fructose-1-phosphate kinase	2.7.1.56	no	e : enzyme			16.11 : Scavenge (Catabolism) ;	168069, 14563858, 24328040	no	2a : Function from experimental evidences in other organisms	2022-01-17	2	5216534	5217445	912
6367	5	Bacillus thuringiensis C15	93116934	SEIU01_240111	CDS	automatic/finished	fruK	fructose-1-phosphate kinase	2.7.1.56	no	e : enzyme			16.11 : Scavenge (Catabolism) ;	168069, 14563858, 24328040	no	2a : Function from experimental evidences in other organisms	2022-01-17	2	762521	763432	912
6367	5	Pseudomonas sp. B10	93124374	SEIT01_430093	CDS	automatic/finished	fruK	1-phosphofructokinase	2.7.1.56	no						no		2022-01-17	-2	2877431	2878372	942
6367	5	Pseudomonas sp. SWI36 SWI36_1	77227097	SEIS01_1610014	CDS	automatic/finished	fruK	1-phosphofructokinase	2.7.1.56	no						no		2020-07-15	-1	4086832	4087779	948
6367	5	Pseudomonas sp. SWI36 SWI36_2	77222627	SEIQ01_1900013	CDS	automatic/finished	fruK	1-phosphofructokinase	2.7.1.56	no						no		2020-07-15	-1	5331196	5332143	948
6425	5	Bacillus albus PFYN01	93128768	SEIR01_460009	CDS	automatic/finished		thiosulfate/3-mercaptopyruvate sulfurtransferase	2.8.1.1, 2.8.1.2	no						no		2022-01-17	-1	1062089	1062922	834
6425	5	Bacillus thuringiensis C15	93121296	SEIU01_1180182	CDS	automatic/finished		thiosulfate/3-mercaptopyruvate sulfurtransferase	2.8.1.1, 2.8.1.2	no						no		2022-01-17	3	4894497	4895330	834
6425	5	Pseudomonas sp. B10	93121943	SEIT01_10249	CDS	automatic/finished	sseA	putative 3-mercaptopyruvate sulfurtransferase	2.8.1.2	no						no	3 : Putative function from multiple computational evidences	2022-01-17	-1	272313	273167	855
6425	5	Pseudomonas sp. SWI36 SWI36_1	77227959	SEIS01_1860019	CDS	automatic/finished	sseA	putative 3-mercaptopyruvate sulfurtransferase	2.8.1.2	no						no	3 : Putative function from multiple computational evidences	2020-07-15	2	5041493	5042347	855
6425	5	Pseudomonas sp. SWI36 SWI36_2	77218425	SEIQ01_280009	CDS	automatic/finished	sseA	putative 3-mercaptopyruvate sulfurtransferase	2.8.1.2	no						no	3 : Putative function from multiple computational evidences	2020-07-15	-3	915455	916309	855
65	5	Bacillus albus PFYN01	93132435	SEIR01_3350036	CDS	automatic/finished	cysW	sulfate/thiosulfate ABC transporter inner membrane subunit CysW	7.3.2.3, 7.3.2.5	no						no		2022-01-17	-2	4387009	4387866	858
65	5	Bacillus albus PFYN01	93132436	SEIR01_3350037	CDS	automatic/finished	cysU	sulfate/thiosulfate ABC transporter inner membrane subunit CysU	7.3.2.3, 7.3.2.5	no						no		2022-01-17	-3	4387878	4388705	828
65	5	Bacillus thuringiensis C15	93118311	SEIU01_570065	CDS	automatic/finished	cysW	sulfate/thiosulfate ABC transporter inner membrane subunit CysW	7.3.2.3, 7.3.2.5	no						no		2022-01-17	-2	2042319	2043176	858
65	5	Bacillus thuringiensis C15	93118312	SEIU01_570066	CDS	automatic/finished	cysU	sulfate/thiosulfate ABC transporter inner membrane subunit CysU	7.3.2.3, 7.3.2.5	no						no		2022-01-17	-3	2043188	2044015	828
65	5	Pseudomonas sp. B10	93125443	SEIT01_580012	CDS	automatic/finished	cysW	sulfate/thiosulfate ABC transporter inner membrane subunit CysW	7.3.2.3, 7.3.2.5	no						no		2022-01-17	-2	4034018	4034890	873
65	5	Pseudomonas sp. B10	93125444	SEIT01_580013	CDS	automatic/finished	cysU	sulfate/thiosulfate ABC transporter inner membrane subunit CysU	7.3.2.3, 7.3.2.5	no						no		2022-01-17	-1	4034904	4035722	819
65	5	Pseudomonas sp. SWI36 SWI36_1	77226316	SEIS01_1460008	CDS	automatic/finished	cysU	sulfate/thiosulfate ABC transporter inner membrane subunit CysU	7.3.2.-	no						no		2020-07-15	3	3243840	3244658	819
65	5	Pseudomonas sp. SWI36 SWI36_1	77226317	SEIS01_1460009	CDS	automatic/finished	cysW	sulfate/thiosulfate ABC transporter inner membrane subunit CysW	7.3.2.-	no						no		2020-07-15	2	3244670	3245542	873
65	5	Pseudomonas sp. SWI36 SWI36_2	77220614	SEIQ01_1400008	CDS	automatic/finished	cysU	sulfate/thiosulfate ABC transporter inner membrane subunit CysU	7.3.2.-	no						no		2020-07-15	3	3215568	3216386	819
65	5	Pseudomonas sp. SWI36 SWI36_2	77220615	SEIQ01_1400009	CDS	automatic/finished	cysW	sulfate/thiosulfate ABC transporter inner membrane subunit CysW	7.3.2.-	no						no		2020-07-15	2	3216398	3217270	873
6517	5	Bacillus albus PFYN01	93130330	SEIR01_1350054	CDS	automatic/finished	cmk	BH3562 homolog		no						no		2022-01-17	2	2489168	2489413	246
6517	5	Bacillus thuringiensis C15	93118717	SEIU01_630117	CDS	automatic/finished	cmk	BH3562 homolog		no						no		2022-01-17	-2	2431002	2431247	246
6517	5	Pseudomonas sp. B10	93126422	SEIT01_760153	CDS	automatic/finished		Glutaredoxin-like protein DUF836		no						no		2022-01-17	1	5086405	5086641	237
6517	5	Pseudomonas sp. SWI36 SWI36_1	77227695	SEIS01_1790005	CDS	automatic/finished		Thiol-disulfide isomerase and thioredoxins		no						no		2020-07-15	-2	4749783	4750022	240
6517	5	Pseudomonas sp. SWI36 SWI36_2	77221586	SEIQ01_1600007	CDS	automatic/finished		Thiol-disulfide isomerase and thioredoxins		no						no		2020-07-15	-1	4208716	4208955	240
6545	5	Bacillus albus PFYN01	93129899	SEIR01_1120073	CDS	automatic/finished	yfkJ	protein-tyrosine-phosphatase	3.1.3.48	no	e : enzyme			16.3 : Control ; 16.8 : Protect ;	15995210	no	2a : Function from experimental evidences in other organisms	2022-01-17	-2	2093998	2094462	465
6545	5	Bacillus thuringiensis C15	93119998	SEIU01_850137	CDS	automatic/finished	yfkJ	protein-tyrosine-phosphatase	3.1.3.48	no	e : enzyme			16.3 : Control ; 16.8 : Protect ;	15995210	no	2a : Function from experimental evidences in other organisms	2022-01-17	1	3686068	3686532	465
6545	5	Pseudomonas sp. B10	93124964	SEIT01_510020	CDS	automatic/finished		putative low molecular weight protein-tyrosine-phosphatase slr0328	3.1.3.48	no						no	3 : Putative function from multiple computational evidences	2022-01-17	2	3511316	3511780	465
6545	5	Pseudomonas sp. SWI36 SWI36_1	77224197	SEIS01_400007	CDS	automatic/finished		Low molecular weight protein tyrosine phosphatase	3.1.3.48	no						no		2020-07-15	-1	1091728	1092192	465
6545	5	Pseudomonas sp. SWI36 SWI36_2	77218592	SEIQ01_380006	CDS	automatic/finished		Low molecular weight protein tyrosine phosphatase	3.1.3.48	no						no		2020-07-15	-3	1121318	1121782	465
66	5	Bacillus albus PFYN01	93132437	SEIR01_3350038	CDS	automatic/finished	sbp	sulfate/thiosulfate ABC transporter periplasmic binding protein Sbp	7.3.2.3, 7.3.2.5	no						no		2022-01-17	-1	4388738	4389793	1056
66	5	Bacillus thuringiensis C15	93118313	SEIU01_570067	CDS	automatic/finished	sbp	sulfate/thiosulfate ABC transporter periplasmic binding protein Sbp	7.3.2.3, 7.3.2.5	no						no		2022-01-17	-1	2044048	2045103	1056
66	5	Pseudomonas sp. B10	93125445	SEIT01_580014	CDS	automatic/finished	sbp	sulfate/thiosulfate ABC transporter periplasmic binding protein Sbp	7.3.2.3, 7.3.2.5	no						no		2022-01-17	-3	4035793	4036806	1014
66	5	Pseudomonas sp. B10	93125598	SEIT01_610018	CDS	automatic/finished	sbp	sulfate/thiosulfate ABC transporter periplasmic binding protein Sbp	7.3.2.3, 7.3.2.5	no						no		2022-01-17	1	4198339	4199337	999
66	5	Pseudomonas sp. SWI36 SWI36_1	77226315	SEIS01_1460007	CDS	automatic/finished	sbp	sulfate/thiosulfate ABC transporter periplasmic binding protein Sbp	7.3.2.-	no						no		2020-07-15	3	3242649	3243656	1008
66	5	Pseudomonas sp. SWI36 SWI36_1	77227609	SEIS01_1760012	CDS	automatic/finished	sbp	sulfate/thiosulfate ABC transporter periplasmic binding protein Sbp	7.3.2.-	no						no		2020-07-15	-1	4664098	4665096	999
66	5	Pseudomonas sp. SWI36 SWI36_2	77220613	SEIQ01_1400007	CDS	automatic/finished	sbp	sulfate/thiosulfate ABC transporter periplasmic binding protein Sbp	7.3.2.-	no						no		2020-07-15	3	3214377	3215384	1008
66	5	Pseudomonas sp. SWI36 SWI36_2	77221989	SEIQ01_1710012	CDS	automatic/finished	sbp	sulfate/thiosulfate ABC transporter periplasmic binding protein Sbp	7.3.2.-	no						no		2020-07-15	-1	4656415	4657413	999
6621	5	Bacillus albus PFYN01	93133525	SEIR01_4360026	CDS	automatic/finished	mqo	malate:quinone oxidoreductase	1.1.5.4	no						no		2022-01-17	-3	5406480	5407982	1503
6621	5	Bacillus thuringiensis C15	93118464	SEIU01_600024	CDS	automatic/finished	mqo	malate:quinone oxidoreductase	1.1.5.4	no						no		2022-01-17	2	2187767	2189269	1503
6621	5	Pseudomonas sp. B10	93122808	SEIT01_270065	CDS	automatic/finished	mqo	malate:quinone oxidoreductase	1.1.5.4	no						no		2022-01-17	2	1167371	1168879	1509
6621	5	Pseudomonas sp. B10	93126609	SEIT01_830009	CDS	automatic/finished	mqo	malate:quinone oxidoreductase	1.1.5.4	no						no		2022-01-17	1	5278228	5279877	1650
6621	5	Pseudomonas sp. SWI36 SWI36_1	77224241	SEIS01_430015	CDS	automatic/finished	mqo	malate:quinone oxidoreductase	1.1.5.4	no						no		2020-07-15	1	1128808	1130445	1638
6621	5	Pseudomonas sp. SWI36 SWI36_1	77225389	SEIS01_1310003	CDS	automatic/finished	mqo	malate:quinone oxidoreductase	1.1.5.4	no						no		2020-07-15	-3	2300846	2302465	1620
6621	5	Pseudomonas sp. SWI36 SWI36_1	77227503	SEIS01_1730001	CDS	automatic/finished	mqo	malate:quinone oxidoreductase	1.1.5.4	no						no		2020-07-15	-2	4558356	4559864	1509
6621	5	Pseudomonas sp. SWI36 SWI36_2	77218598	SEIQ01_390001	CDS	automatic/finished	mqo	malate:quinone oxidoreductase	1.1.5.4	no						no		2020-07-15	-1	1125166	1126803	1638
6621	5	Pseudomonas sp. SWI36 SWI36_2	77222748	SEIQ01_1960001	CDS	automatic/finished	mqo	malate:quinone oxidoreductase	1.1.5.4	no						no		2020-07-15	-3	5458097	5459605	1509
6621	5	Pseudomonas sp. SWI36 SWI36_2	77222875	SEIQ01_1990074	CDS	automatic/finished	mqo	malate:quinone oxidoreductase	1.1.5.4	no						no		2020-07-15	-2	5576964	5578583	1620
6633	5	Bacillus albus PFYN01	93133426	SEIR01_4340090	CDS	automatic/finished	hisP	histidine / basic amino acid transporter		no	t : transporter			16.1 : Circulate ;	15135544, 15849754, 16850406, 23504016	no	2b : Function from indirect experimental evidences (e.g. phenotypes)	2022-01-17	3	5322291	5323610	1320
6633	5	Bacillus thuringiensis C15	93120453	SEIU01_960154	CDS	automatic/finished	hisP	histidine / basic amino acid transporter		no	t : transporter			16.1 : Circulate ;	15135544, 15849754, 16850406, 23504016	no	2b : Function from indirect experimental evidences (e.g. phenotypes)	2022-01-17	-3	4127159	4128478	1320
6633	5	Pseudomonas sp. B10	93122163	SEIT01_30002	CDS	automatic/finished		Glutamine transporter 1		no						no		2022-01-17	1	504712	506028	1317
6633	5	Pseudomonas sp. SWI36 SWI36_1	77228375	SEIS01_2010009	CDS	automatic/finished		Glutamine transporter 1		no						no		2020-07-15	-1	5480098	5481417	1320
6633	5	Pseudomonas sp. SWI36 SWI36_2	77220339	SEIQ01_1340039	CDS	automatic/finished		Glutamine transporter 1		no						no		2020-07-15	2	2932886	2934205	1320
6695	5	Bacillus albus PFYN01	93129943	SEIR01_1120117	CDS	automatic/finished	arcD	Arginine/ornithine antiporter		no						no		2022-01-17	-3	2142603	2144018	1416
6695	5	Bacillus albus PFYN01	93132865	SEIR01_4210009	CDS	automatic/finished	arcD	Arginine/ornithine antiporter		no						no		2022-01-17	-1	4793552	4794979	1428
6695	5	Bacillus thuringiensis C15	93117576	SEIU01_500056	CDS	automatic/finished	arcD	Arginine/ornithine antiporter		no						no		2022-01-17	2	1363352	1364779	1428
6695	5	Bacillus thuringiensis C15	93119954	SEIU01_850093	CDS	automatic/finished	arcD	Arginine/ornithine antiporter		no						no		2022-01-17	2	3633764	3635179	1416
6695	5	Pseudomonas sp. B10	93122991	SEIT01_290021	CDS	automatic/finished	ydgI	putative arginine:ornithine antiporter		no						no	3 : Putative function from multiple computational evidences	2022-01-17	-1	1387926	1389353	1428
6695	5	Pseudomonas sp. B10	93122992	SEIT01_290022	CDS	automatic/finished	ydgI	putative arginine:ornithine antiporter		no						no	3 : Putative function from multiple computational evidences	2022-01-17	3	1389804	1391231	1428
6695	5	Pseudomonas sp. B10	93123140	SEIT01_300073	CDS	automatic/finished	arcD	Arginine/ornithine antiporter		no						no		2022-01-17	-3	1559890	1561380	1491
6695	5	Pseudomonas sp. SWI36 SWI36_1	77227490	SEIS01_1720016	CDS	automatic/finished	ydgI	putative arginine:ornithine antiporter		no						no	3 : Putative function from multiple computational evidences	2020-07-15	-2	4542831	4544258	1428
6695	5	Pseudomonas sp. SWI36 SWI36_1	77227492	SEIS01_1720018	CDS	automatic/finished	ydgI	putative arginine:ornithine antiporter		no						no	3 : Putative function from multiple computational evidences	2020-07-15	1	4544695	4546122	1428
6695	5	Pseudomonas sp. SWI36 SWI36_2	77221936	SEIQ01_1690016	CDS	automatic/finished	ydgI	putative arginine:ornithine antiporter		no						no	3 : Putative function from multiple computational evidences	2020-07-15	-2	4598853	4600280	1428
6695	5	Pseudomonas sp. SWI36 SWI36_2	77221938	SEIQ01_1690018	CDS	automatic/finished	ydgI	putative arginine:ornithine antiporter		no						no	3 : Putative function from multiple computational evidences	2020-07-15	1	4600717	4602144	1428
6697	5	Bacillus albus PFYN01	93129386	SEIR01_790023	CDS	automatic/finished	citH	secondary transporter of divalent metal ions/citrate complexes		no	t : transporter			16.1 : Circulate ;	8892821, 11053381, 15849754, 16850406, 18556792	no	2a : Function from experimental evidences in other organisms	2022-01-17	-2	1610215	1611519	1305
6697	5	Bacillus thuringiensis C15	93121564	SEIU01_1290120	CDS	automatic/finished	citH	secondary transporter of divalent metal ions/citrate complexes		no	t : transporter			16.1 : Circulate ;	8892821, 11053381, 15849754, 16850406, 18556792	no	2a : Function from experimental evidences in other organisms	2022-01-17	3	5157438	5158742	1305
6697	5	Pseudomonas sp. B10	93123733	SEIT01_350086	CDS	automatic/finished	citN	Citrate transporter		no						no		2022-01-17	-2	2205692	2206999	1308
6697	5	Pseudomonas sp. SWI36 SWI36_1	77225257	SEIS01_1220001	CDS	automatic/finished	yraO	Uncharacterized transporter YraO		no						no		2020-07-15	2	2157845	2159059	1215
6697	5	Pseudomonas sp. SWI36 SWI36_1	77226863	SEIS01_1560026	CDS	automatic/finished	citN	Citrate transporter		no						no		2020-07-15	-1	3811204	3812511	1308
6697	5	Pseudomonas sp. SWI36 SWI36_2	77219649	SEIQ01_1170001	CDS	automatic/finished	yraO	Uncharacterized transporter YraO		no						no		2020-07-15	-1	2203489	2204703	1215
6697	5	Pseudomonas sp. SWI36 SWI36_2	77221202	SEIQ01_1520017	CDS	automatic/finished	citN	Citrate transporter		no						no		2020-07-15	2	3829991	3831298	1308
6737	5	Bacillus albus PFYN01	93127619	SEIR01_10058	CDS	automatic/finished	ydfP	putative membrane bound oxidoreductase	1.-.-.-	no	e : enzyme			16.11 : Scavenge (Catabolism) ; 16.8 : Protect ;	15306018, 15849754, 16850406, 17407181	no	3 : Putative function from multiple computational evidences	2022-01-17	1	52075	52461	387
6737	5	Bacillus albus PFYN01	93128604	SEIR01_350071	CDS	automatic/finished	catD	catechol-2,3-dioxygenase membrane subunit	1.13.11.2	no	e : enzyme			16.11 : Scavenge (Catabolism) ;	15849754, 16872404, 16850406, 17407181, 20639328, 30377275	no	2a : Function from experimental evidences in other organisms	2022-01-17	-3	917598	918002	405
6737	5	Bacillus albus PFYN01	93129430	SEIR01_810004	CDS	automatic/finished	catD	putative oxidoreductase CatD	1.-.-.-	no						no	3 : Putative function from multiple computational evidences	2022-01-17	-1	1658270	1658677	408
6737	5	Bacillus albus PFYN01	93134186	SEIR01_4560100	CDS	automatic/finished	catD	putative oxidoreductase CatD	1.-.-.-	no						no	3 : Putative function from multiple computational evidences	2022-01-17	1	6022849	6023253	405
6737	5	Bacillus thuringiensis C15	93116457	SEIU01_20024	CDS	automatic/finished	ydfP	putative membrane bound oxidoreductase	1.-.-.-	no	e : enzyme			16.11 : Scavenge (Catabolism) ; 16.8 : Protect ;	15306018, 15849754, 16850406, 17407181	no	3 : Putative function from multiple computational evidences	2022-01-17	3	271668	272054	387
6737	5	Bacillus thuringiensis C15	93116755	SEIU01_130111	CDS	automatic/finished	catD	catechol-2,3-dioxygenase membrane subunit	1.13.11.2	no	e : enzyme			16.11 : Scavenge (Catabolism) ;	15849754, 16872404, 16850406, 17407181, 20639328, 30377275	no	2a : Function from experimental evidences in other organisms	2022-01-17	1	584131	584535	405
6737	5	Bacillus thuringiensis C15	93117783	SEIU01_520099	CDS	automatic/finished	catD	putative oxidoreductase CatD	1.-.-.-	no						no	3 : Putative function from multiple computational evidences	2022-01-17	2	1558862	1559266	405
6737	5	Pseudomonas sp. B10	93126364	SEIT01_760095	CDS	automatic/finished	mhqP	putative oxidoreductase MhqP	1.-.-.-	no						no	3 : Putative function from multiple computational evidences	2022-01-17	2	5033762	5034196	435
6737	5	Pseudomonas sp. SWI36 SWI36_1	77223413	SEIS01_20018	CDS	automatic/finished	mhqP	Putative oxidoreductase MhqP	1.-.-.-	no						no	3 : Putative function from multiple computational evidences	2020-07-15	2	265316	265753	438
6737	5	Pseudomonas sp. SWI36 SWI36_2	77221159	SEIQ01_1510017	CDS	automatic/finished	mhqP	Putative oxidoreductase MhqP	1.-.-.-	no						no	3 : Putative function from multiple computational evidences	2020-07-15	1	3791683	3792120	438
675	5	Bacillus albus PFYN01	93134011	SEIR01_4520019	CDS	automatic/finished	ytbD	putative transporter		no	t : transporter			16.1 : Circulate ;	15849754, 16850406, 23504016	no	3 : Putative function from multiple computational evidences	2022-01-17	-1	5866898	5868112	1215
675	5	Bacillus thuringiensis C15	93117389	SEIU01_480063	CDS	automatic/finished	ytbD	putative transporter		no	t : transporter			16.1 : Circulate ;	15849754, 16850406, 23504016	no	3 : Putative function from multiple computational evidences	2022-01-17	-3	1192124	1193338	1215
675	5	Bacillus thuringiensis C15	93118668	SEIU01_630068	CDS	automatic/finished	ytbD	putative transporter		no	t : transporter			16.1 : Circulate ;	15849754, 16850406, 23504016	no	3 : Putative function from multiple computational evidences	2022-01-17	-2	2385000	2386214	1215
675	5	Pseudomonas sp. B10	93121873	SEIT01_10179	CDS	automatic/finished	ydhP	Inner membrane transport protein YdhP		no						no		2022-01-17	1	204424	205593	1170
675	5	Pseudomonas sp. B10	93124701	SEIT01_470006	CDS	automatic/finished	ydhP	Inner membrane transport protein YdhP		no						no		2022-01-17	2	3232595	3233758	1164
675	5	Pseudomonas sp. B10	93125886	SEIT01_650128	CDS	automatic/finished	ydhP	putative transporter YdhP		no						no	3 : Putative function from multiple computational evidences	2022-01-17	1	4497310	4498521	1212
675	5	Pseudomonas sp. SWI36 SWI36_1	77223467	SEIS01_20072	CDS	automatic/finished	ydhP	putative transporter YdhP		no						no	3 : Putative function from multiple computational evidences	2020-07-15	-2	321621	322808	1188
675	5	Pseudomonas sp. SWI36 SWI36_1	77224555	SEIS01_660004	CDS	automatic/finished		MFS transporter		no						no		2020-07-15	2	1466849	1468033	1185
675	5	Pseudomonas sp. SWI36 SWI36_1	77226503	SEIS01_1490053	CDS	automatic/finished	ydhP	putative transporter YdhP		no						no	3 : Putative function from multiple computational evidences	2020-07-15	2	3423392	3424567	1176
675	5	Pseudomonas sp. SWI36 SWI36_2	77217604	SEIQ01_10029	CDS	automatic/finished	ydhP	putative transporter YdhP		no						no	3 : Putative function from multiple computational evidences	2020-07-15	-2	31362	32549	1188
675	5	Pseudomonas sp. SWI36 SWI36_2	77217744	SEIQ01_10169	CDS	automatic/finished	ydhP	putative transporter YdhP		no						no	3 : Putative function from multiple computational evidences	2020-07-15	1	164872	166047	1176
675	5	Pseudomonas sp. SWI36 SWI36_2	77218993	SEIQ01_640006	CDS	automatic/finished		MFS transporter		no						no		2020-07-15	-1	1509115	1510299	1185
6756	5	Bacillus albus PFYN01	93131739	SEIR01_2570024	CDS	automatic/finished		4,5-DOPA dioxygenase extradiol	1.13.11.-	no						no		2022-01-17	-2	3758221	3758982	762
6756	5	Bacillus thuringiensis C15	93116342	SEIU01_10171	CDS	automatic/finished		4,5-DOPA dioxygenase extradiol	1.13.11.-	no						no		2022-01-17	-1	157510	158271	762
6756	5	Pseudomonas sp. B10	93126401	SEIT01_760132	CDS	automatic/finished	ygiD	4,5-DOPA dioxygenase extradiol	1.13.11.29	no						no		2022-01-17	-1	5062182	5062949	768
6756	5	Pseudomonas sp. SWI36 SWI36_1	77224637	SEIS01_690004	CDS	automatic/finished	ygiD	4,5-DOPA dioxygenase extradiol	1.13.11.29	no						no		2020-07-15	-1	1560349	1561116	768
6756	5	Pseudomonas sp. SWI36 SWI36_2	77219005	SEIQ01_660003	CDS	automatic/finished	ygiD	4,5-DOPA dioxygenase extradiol	1.13.11.29	no						no		2020-07-15	2	1522109	1522876	768
6778	5	Bacillus albus PFYN01	93133782	SEIR01_4450049	CDS	automatic/finished	hmpA	flavohemoglobin		no	c : carrier			16.8 : Protect ;	10658656, 10972836, 12469342, 15231799, 15751990, 16261196, 16517672, 17293416, 24214949, 26786044	no	2a : Function from experimental evidences in other organisms	2022-01-17	-2	5654620	5655828	1209
6778	5	Bacillus thuringiensis C15	93121171	SEIU01_1180057	CDS	automatic/finished	hmpA	flavohemoglobin		no	c : carrier			16.8 : Protect ;	10658656, 10972836, 12469342, 15231799, 15751990, 16261196, 16517672, 17293416, 24214949, 26786044	no	2a : Function from experimental evidences in other organisms	2022-01-17	3	4779354	4780562	1209
6778	5	Pseudomonas sp. B10	93124833	SEIT01_490007	CDS	automatic/finished	hmp	Flavohemoprotein	1.14.12.17	no						no		2022-01-17	3	3371076	3372257	1182
6778	5	Pseudomonas sp. SWI36 SWI36_1	77224763	SEIS01_810004	CDS	automatic/finished	hmp	Flavohemoprotein	1.14.12.17	no						no		2020-07-15	2	1703246	1704424	1179
6778	5	Pseudomonas sp. SWI36 SWI36_2	77219124	SEIQ01_780001	CDS	automatic/finished	hmp	Flavohemoprotein	1.14.12.17	no						no		2020-07-15	-2	1666884	1668062	1179
6779	5	Bacillus albus PFYN01	93129067	SEIR01_590007	CDS	automatic/finished		dCTP diphosphatase	3.6.1.12	no						no		2022-01-17	-2	1328509	1328838	330
6779	5	Bacillus thuringiensis C15	93119643	SEIU01_770008	CDS	automatic/finished		Cytoplasmic protein		no						no		2022-01-17	-1	3305236	3305496	261
6779	5	Pseudomonas sp. B10	93124669	SEIT01_460034	CDS	automatic/finished		Nucleotide pyrophosphohydrolase		no						no		2022-01-17	2	3201962	3202264	303
6779	5	Pseudomonas sp. SWI36 SWI36_1	77228474	SEIS01_2040055	CDS	automatic/finished		protein of unknown function		no	u : unknown	1 : Unknown				no	5 : Unknown function	2020-07-15	-2	5598900	5599205	306
6779	5	Pseudomonas sp. SWI36 SWI36_2	77218515	SEIQ01_350021	CDS	automatic/finished		protein of unknown function		no	u : unknown	1 : Unknown				no	5 : Unknown function	2020-07-15	2	1022930	1023235	306
6869	5	Bacillus albus PFYN01	93133379	SEIR01_4340043	CDS	automatic/finished	scpA	chromosome condensation and partitioning factor		no	f : factor			16.9 : Replicate ; 16.13 : Shape ;	12065423, 12100548, 12682299, 12897137, 16272394, 23541893, 24440393, 25951515, 26904953, 28286005, 33176849, 33910021	no	2a : Function from experimental evidences in other organisms	2022-01-17	-1	5284712	5285455	744
6869	5	Bacillus thuringiensis C15	93120499	SEIU01_960200	CDS	automatic/finished	scpA	chromosome condensation and partitioning factor		no	f : factor			16.9 : Replicate ; 16.13 : Shape ;	12065423, 12100548, 12682299, 12897137, 16272394, 23541893, 24440393, 25951515, 26904953, 28286005, 33176849, 33910021	no	2a : Function from experimental evidences in other organisms	2022-01-17	3	4165317	4166060	744
6869	5	Pseudomonas sp. B10	93123862	SEIT01_370027	CDS	automatic/finished	scpA	Segregation and condensation protein A		no						no		2022-01-17	1	2332795	2333613	819
6869	5	Pseudomonas sp. SWI36 SWI36_1	77224503	SEIS01_600004	CDS	automatic/finished	scpA	Segregation and condensation protein A		no						no		2020-07-15	-1	1422310	1423164	855
6869	5	Pseudomonas sp. SWI36 SWI36_2	77221654	SEIQ01_1620004	CDS	automatic/finished	scpA	Segregation and condensation protein A		no						no		2020-07-15	-3	4278611	4279465	855
691	5	Bacillus albus PFYN01	93134106	SEIR01_4560020	CDS	automatic/finished	kdpC	K(+) transporting P-type ATPase subunit KdpC	7.2.2.6	no						no		2022-01-17	2	5950991	5951572	582
691	5	Bacillus thuringiensis C15	93117704	SEIU01_520020	CDS	automatic/finished	kdpC	K(+) transporting P-type ATPase subunit KdpC	7.2.2.6	no						no		2022-01-17	1	1487350	1487931	582
691	5	Pseudomonas sp. B10	93126353	SEIT01_760084	CDS	automatic/finished	kdpC	K(+) transporting P-type ATPase subunit KdpC	7.2.2.6	no						no		2022-01-17	1	5021752	5022297	546
691	5	Pseudomonas sp. SWI36 SWI36_1	77225383	SEIS01_1300054	CDS	automatic/finished	kdpC	K(+) transporting P-type ATPase subunit KdpC	7.2.2.-	no						no		2020-07-15	-1	2293744	2294301	558
691	5	Pseudomonas sp. SWI36 SWI36_2	77219807	SEIQ01_1260004	CDS	automatic/finished	kdpC	K(+) transporting P-type ATPase subunit KdpC	7.2.2.-	no						no		2020-07-15	2	2350928	2351485	558
6952	5	Bacillus albus PFYN01	93131740	SEIR01_2570025	CDS	automatic/finished		Alpha/beta hydrolase		no						no		2022-01-17	1	3759190	3760113	924
6952	5	Bacillus thuringiensis C15	93116343	SEIU01_10172	CDS	automatic/finished		Hydrolase_4 domain-containing protein		no						no		2022-01-17	2	158483	159406	924
6952	5	Pseudomonas sp. B10	93126591	SEIT01_820019	CDS	automatic/finished		Alpha/beta hydrolase		no						no		2022-01-17	2	5260262	5261206	945
6952	5	Pseudomonas sp. SWI36 SWI36_1	77227938	SEIS01_1850028	CDS	automatic/finished		putative Lysophospholipase ;	3.1.1.5, 3.1.1.23	no						no	3 : Putative function from multiple computational evidences	2020-07-15	-1	5016991	5017935	945
6952	5	Pseudomonas sp. SWI36 SWI36_2	77218830	SEIQ01_550006	CDS	automatic/finished		putative Lysophospholipase ;	3.1.1.5, 3.1.1.23	no						no	3 : Putative function from multiple computational evidences	2020-07-15	-1	1362991	1363935	945
696	5	Bacillus albus PFYN01	93129573	SEIR01_900067	CDS	automatic/finished	ywdH	putative aldehyde dehydrogenase	1.2.1.-	no	e : enzyme			16.11 : Scavenge (Catabolism) ;		no	3 : Putative function from multiple computational evidences	2022-01-17	-2	1795867	1797234	1368
696	5	Bacillus thuringiensis C15	93117109	SEIU01_460013	CDS	automatic/finished	ywdH	putative aldehyde dehydrogenase	1.2.1.-	no	e : enzyme			16.11 : Scavenge (Catabolism) ;		no	3 : Putative function from multiple computational evidences	2022-01-17	2	931685	933052	1368
696	5	Pseudomonas sp. B10	93121945	SEIT01_10251	CDS	automatic/finished	calB	putative coniferyl aldehyde dehydrogenase	1.2.1.68	no						no	3 : Putative function from multiple computational evidences	2022-01-17	3	274014	275444	1431
696	5	Pseudomonas sp. SWI36 SWI36_1	77227957	SEIS01_1860017	CDS	automatic/finished	calB	putative coniferyl aldehyde dehydrogenase	1.2.1.68	no						no	3 : Putative function from multiple computational evidences	2020-07-15	-2	5039211	5040641	1431
696	5	Pseudomonas sp. SWI36 SWI36_2	77218427	SEIQ01_280011	CDS	automatic/finished	calB	putative coniferyl aldehyde dehydrogenase	1.2.1.68	no						no	3 : Putative function from multiple computational evidences	2020-07-15	1	917161	918591	1431
707	5	Bacillus albus PFYN01	93131785	SEIR01_2630001	CDS	automatic/finished	selO	Protein adenylyltransferase SelO	2.7.7.-	no						no		2022-01-17	-2	3802156	3803622	1467
707	5	Bacillus thuringiensis C15	93120230	SEIU01_920014	CDS	automatic/finished	selO	Protein adenylyltransferase SelO	2.7.7.-	no						no		2022-01-17	3	3918825	3920291	1467
707	5	Pseudomonas sp. B10	93123371	SEIT01_320102	CDS	automatic/finished	selO	Protein adenylyltransferase SelO	2.7.7.-	no						no		2022-01-17	-2	1809620	1811083	1464
707	5	Pseudomonas sp. SWI36 SWI36_1	77226114	SEIS01_1420019	CDS	automatic/finished	selO	Protein adenylyltransferase SelO	2.7.7.-	no						no		2020-07-15	3	3050940	3052400	1461
707	5	Pseudomonas sp. SWI36 SWI36_2	77219936	SEIQ01_1280019	CDS	automatic/finished	selO	Protein adenylyltransferase SelO	2.7.7.-	no						no		2020-07-15	3	2501142	2502602	1461
7117	5	Bacillus albus PFYN01	93130578	SEIR01_1570025	CDS	automatic/finished	bcd	branched-chain amino acid dehydrogenase	1.4.1.-, 1.4.1.9, 1.4.1.8	no	e : enzyme			16.2 : Construct biomass (Anabolism) ; 16.8 : Protect ; 16.11 : Scavenge (Catabolism) ;	4204435, 10094682, 12427936, 15241682, 20935095, 21856856, 22720735, 28165735	no	2a : Function from experimental evidences in other organisms	2022-01-17	-1	2713013	2714113	1101
7117	5	Bacillus thuringiensis C15	93120391	SEIU01_960092	CDS	automatic/finished	bcd	branched-chain amino acid dehydrogenase	1.4.1.-, 1.4.1.9, 1.4.1.8	no	e : enzyme			16.2 : Construct biomass (Anabolism) ; 16.8 : Protect ; 16.11 : Scavenge (Catabolism) ;	4204435, 10094682, 12427936, 15241682, 20935095, 21856856, 22720735, 28165735	no	2a : Function from experimental evidences in other organisms	2022-01-17	3	4070289	4071389	1101
7117	5	Pseudomonas sp. B10	93122518	SEIT01_250039	CDS	automatic/finished	yqiT	Leucine dehydrogenase	1.4.1.9	no						no		2022-01-17	2	873623	874642	1020
7117	5	Pseudomonas sp. SWI36 SWI36_1	77224331	SEIS01_480004	CDS	automatic/finished	ldh	Leucine dehydrogenase	1.4.1.9	no						no		2020-07-15	-3	1241336	1242355	1020
7117	5	Pseudomonas sp. SWI36 SWI36_2	77218657	SEIQ01_440004	CDS	automatic/finished	ldh	Leucine dehydrogenase	1.4.1.9	no						no		2020-07-15	-3	1182335	1183354	1020
712	5	Bacillus albus PFYN01	93130842	SEIR01_1790023	CDS	automatic/finished	rplO	ribosomal protein L15		no	s : structure			16.2 : Construct biomass (Anabolism) ;	12682299, 15855514, 23002217	no	2a : Function from experimental evidences in other organisms	2022-01-17	-2	2933674	2934114	441
712	5	Bacillus thuringiensis C15	93118338	SEIU01_580023	CDS	automatic/finished	rplO	ribosomal protein L15		no	s : structure			16.2 : Construct biomass (Anabolism) ;	12682299, 15855514, 23002217	no	2a : Function from experimental evidences in other organisms	2022-01-17	-1	2062765	2063205	441
712	5	Pseudomonas sp. B10	93125912	SEIT01_650154	CDS	automatic/finished	rplO	50S ribosomal subunit protein L15		no						no		2022-01-17	-1	4522794	4523231	438
712	5	Pseudomonas sp. SWI36 SWI36_1	77223904	SEIS01_240038	CDS	automatic/finished	rplO	50S ribosomal subunit protein L15		no						no		2020-07-15	1	767626	768060	435
712	5	Pseudomonas sp. SWI36 SWI36_2	77218882	SEIQ01_570038	CDS	automatic/finished	rplO	50S ribosomal subunit protein L15		no						no		2020-07-15	2	1406012	1406446	435
7123	5	Bacillus albus PFYN01	93134321	SEIR01_4620001	CDS	automatic/finished	cidB	metabolic regulator controlling activity of murein hydrolases		no	r : regulator			16.13 : Shape ;	15659658, 15849754, 16850406, 26060272	no	2a : Function from experimental evidences in other organisms	2022-01-17	3	6134904	6135581	678
7123	5	Bacillus thuringiensis C15	93118923	SEIU01_650027	CDS	automatic/finished	cidB	metabolic regulator controlling activity of murein hydrolases		no	r : regulator			16.13 : Shape ;	15659658, 15849754, 16850406, 26060272	no	2a : Function from experimental evidences in other organisms	2022-01-17	-3	2638334	2639011	678
7123	5	Pseudomonas sp. B10	93122501	SEIT01_250022	CDS	automatic/finished		LrgB family protein		no						no		2022-01-17	2	850688	851374	687
7123	5	Pseudomonas sp. SWI36 SWI36_1	77225567	SEIS01_1340002	CDS	automatic/finished		CidA-associated membrane protein CidB		no						no		2020-07-15	-2	2485713	2486399	687
7123	5	Pseudomonas sp. SWI36 SWI36_2	77220016	SEIQ01_1290055	CDS	automatic/finished		CidA-associated membrane protein CidB		no						no		2020-07-15	1	2590489	2591175	687
7156	5	Bacillus albus PFYN01	93128316	SEIR01_240015	CDS	automatic/finished	pyrP	uracil permease		no	t : transporter			16.1 : Circulate ;	8206848, 15849754, 16850406	no	2a : Function from experimental evidences in other organisms	2022-01-17	-3	655620	656903	1284
7156	5	Bacillus thuringiensis C15	93119453	SEIU01_740132	CDS	automatic/finished	pyrP	uracil permease		no	t : transporter			16.1 : Circulate ;	8206848, 15849754, 16850406	no	2a : Function from experimental evidences in other organisms	2022-01-17	1	3123469	3124752	1284
7156	5	Pseudomonas sp. B10	93122814	SEIT01_270071	CDS	automatic/finished	uraA	putative uracil permease		no						no	3 : Putative function from multiple computational evidences	2022-01-17	1	1171741	1173015	1275
7156	5	Pseudomonas sp. SWI36 SWI36_1	77226622	SEIS01_1500042	CDS	automatic/finished	uraA	putative uracil permease		no						no	3 : Putative function from multiple computational evidences	2020-07-15	-2	3560508	3561773	1266
7156	5	Pseudomonas sp. SWI36 SWI36_2	77220694	SEIQ01_1410041	CDS	automatic/finished	uraA	putative uracil permease		no						no	3 : Putative function from multiple computational evidences	2020-07-15	-2	3299493	3300758	1266
7182	5	Bacillus albus PFYN01	93128952	SEIR01_550014	CDS	automatic/finished	pssA	CDP-diacylglycerol--serine O-phosphatidyltransferase	2.7.8.8	no						no		2022-01-17	2	1229243	1229734	492
7182	5	Bacillus albus PFYN01	93133813	SEIR01_4450080	CDS	automatic/finished		CDP-diacylglycerol---serine O-phosphatidyltransferase	2.7.8.8	no						no		2022-01-17	2	5685323	5686024	702
7182	5	Bacillus thuringiensis C15	93120241	SEIU01_920025	CDS	automatic/finished	pssA	CDP-diacylglycerol--serine O-phosphatidyltransferase	2.7.8.8	no						no		2022-01-17	3	3927693	3928184	492
7182	5	Bacillus thuringiensis C15	93121140	SEIU01_1180026	CDS	automatic/finished		CDP-diacylglycerol---serine O-phosphatidyltransferase	2.7.8.8	no						no		2022-01-17	-2	4749174	4749875	702
7182	5	Pseudomonas sp. B10	93122159	SEIT01_20142	CDS	automatic/finished		CDP-diacylglycerol---serine O-phosphatidyltransferase	2.7.8.8	no						no		2022-01-17	1	499909	500766	858
7182	5	Pseudomonas sp. SWI36 SWI36_1	77224145	SEIS01_350068	CDS	automatic/finished		CDP-diacylglycerol--serine O-phosphatidyltransferase	2.7.8.8	no						no		2020-07-15	3	1030776	1031627	852
7182	5	Pseudomonas sp. SWI36 SWI36_2	77219195	SEIQ01_790068	CDS	automatic/finished		CDP-diacylglycerol--serine O-phosphatidyltransferase	2.7.8.8	no						no		2020-07-15	1	1746277	1747128	852
719	5	Bacillus albus PFYN01	93131614	SEIR01_2450001	CDS	automatic/finished	trnE	cys-tRNApro deacetylase; tRNA editing		no	e : enzyme			16.6 : Maintain ; 16.8 : Protect ;	22128149	no	2a : Function from experimental evidences in other organisms	2022-01-17	-1	3647393	3647869	477
719	5	Bacillus thuringiensis C15	93118545	SEIU01_610058	CDS	automatic/finished	trnE	cys-tRNApro deacetylase; tRNA editing		no	e : enzyme			16.6 : Maintain ; 16.8 : Protect ;	22128149	no	2a : Function from experimental evidences in other organisms	2022-01-17	-2	2260623	2261099	477
719	5	Pseudomonas sp. B10	93123572	SEIT01_340019	CDS	automatic/finished	ybaK	Cys-tRNA(Pro) and Cys-tRNA(Cys) deacylase		no						no		2022-01-17	2	2049440	2049910	471
719	5	Pseudomonas sp. SWI36 SWI36_1	77224821	SEIS01_900026	CDS	automatic/finished	ybaK	Cys-tRNA(Pro) and Cys-tRNA(Cys) deacylase		no						no		2020-07-15	-3	1754885	1755355	471
719	5	Pseudomonas sp. SWI36 SWI36_2	77220426	SEIQ01_1360026	CDS	automatic/finished	ybaK	Cys-tRNA(Pro) and Cys-tRNA(Cys) deacylase		no						no		2020-07-15	1	3032983	3033453	471
7223	5	Bacillus albus PFYN01	93129021	SEIR01_570044	CDS	automatic/finished	ydgK	Uncharacterized MFS-type transporter YdgK		no						no		2022-01-17	-3	1287204	1288400	1197
7223	5	Bacillus thuringiensis C15	93118209	SEIU01_560023	CDS	automatic/finished	ydgK	Uncharacterized MFS-type transporter YdgK		no						no		2022-01-17	3	1949397	1950593	1197
7223	5	Pseudomonas sp. B10	93126237	SEIT01_740022	CDS	automatic/finished		Bcr/CflA family efflux transporter		no						no		2022-01-17	-2	4886486	4887688	1203
7223	5	Pseudomonas sp. SWI36 SWI36_1	77228484	SEIS01_2040065	CDS	automatic/finished		Bcr/CflA family efflux transporter		no		Cell inner membrane; Multi-pass membrane protein				no		2020-07-15	2	5609657	5610838	1182
7223	5	Pseudomonas sp. SWI36 SWI36_2	77218505	SEIQ01_350011	CDS	automatic/finished		Bcr/CflA family efflux transporter		no		Cell inner membrane; Multi-pass membrane protein				no		2020-07-15	-2	1011297	1012478	1182
7332	5	Bacillus albus PFYN01	93130335	SEIR01_1350059	CDS	automatic/finished	pgm	phosphoglycerate mutase	5.4.2.12	no	e : enzyme			16.2 : Construct biomass (Anabolism) ;	9830105, 10869096, 12682299, 19193632, 22720735	no	2a : Function from experimental evidences in other organisms	2022-01-17	3	2493717	2495246	1530
7332	5	Bacillus thuringiensis C15	93118712	SEIU01_630112	CDS	automatic/finished	pgm	phosphoglycerate mutase	5.4.2.12	no	e : enzyme			16.2 : Construct biomass (Anabolism) ;	9830105, 10869096, 12682299, 19193632, 22720735	no	2a : Function from experimental evidences in other organisms	2022-01-17	-3	2425169	2426698	1530
7332	5	Pseudomonas sp. B10	93124158	SEIT01_410014	CDS	automatic/finished	gpmM	2,3-bisphosphoglycerate-independent phosphoglycerate mutase	5.4.2.12	no						no		2022-01-17	1	2639860	2641386	1527
7332	5	Pseudomonas sp. SWI36 SWI36_1	77226102	SEIS01_1420007	CDS	automatic/finished	gpmM	2,3-bisphosphoglycerate-independent phosphoglycerate mutase	5.4.2.12	no						no		2020-07-15	2	3026891	3028426	1536
7332	5	Pseudomonas sp. SWI36 SWI36_2	77219924	SEIQ01_1280007	CDS	automatic/finished	gpmM	2,3-bisphosphoglycerate-independent phosphoglycerate mutase	5.4.2.12	no						no		2020-07-15	2	2477093	2478628	1536
7338	5	Bacillus albus PFYN01	93132339	SEIR01_3340060	CDS	automatic/finished	rfbC	dTDP-4-dehydrorhamnose 3,5-epimerase	5.1.3.13	no						no		2022-01-17	-2	4301191	4301736	546
7338	5	Bacillus thuringiensis C15	93118071	SEIU01_540028	CDS	automatic/finished	rfbC	dTDP-4-dehydrorhamnose 3,5-epimerase	5.1.3.13	no						no		2022-01-17	1	1816576	1817121	546
7338	5	Pseudomonas sp. B10	93123888	SEIT01_370053	CDS	automatic/finished		dTDP-4-dehydrorhamnose 3,5-epimerase	5.1.3.13	no						no		2022-01-17	2	2362328	2362888	561
7338	5	Pseudomonas sp. B10	93124206	SEIT01_410062	CDS	automatic/finished	rfbC	dTDP-4-dehydrorhamnose 3,5-epimerase	5.1.3.13	no						no		2022-01-17	2	2686979	2687524	546
7338	5	Pseudomonas sp. SWI36 SWI36_1	77228029	SEIS01_1890010	CDS	automatic/finished	rfbC	dTDP-4-dehydrorhamnose 3,5-epimerase	5.1.3.13	no						no		2020-07-15	3	5118651	5119196	546
7338	5	Pseudomonas sp. SWI36 SWI36_2	77222334	SEIQ01_1810012	CDS	automatic/finished	rfbC	dTDP-4-dehydrorhamnose 3,5-epimerase	5.1.3.13	no						no		2020-07-15	-2	5027991	5028536	546
7339	5	Bacillus albus PFYN01	93129945	SEIR01_1120119	CDS	automatic/finished	arcA	Arginine deiminase	3.5.3.6	no						no		2022-01-17	-3	2145147	2146379	1233
7339	5	Bacillus thuringiensis C15	93119952	SEIU01_850091	CDS	automatic/finished	arcA	Arginine deiminase	3.5.3.6	no						no		2022-01-17	2	3631403	3632635	1233
7339	5	Pseudomonas sp. B10	93122993	SEIT01_290023	CDS	automatic/finished	arcA	Arginine deiminase	3.5.3.6	no						no		2022-01-17	1	1391266	1392522	1257
7339	5	Pseudomonas sp. SWI36 SWI36_1	77227489	SEIS01_1720015	CDS	automatic/finished	arcA	Arginine deiminase	3.5.3.6	no						no		2020-07-15	-2	4541544	4542797	1254
7339	5	Pseudomonas sp. SWI36 SWI36_2	77221935	SEIQ01_1690015	CDS	automatic/finished	arcA	Arginine deiminase	3.5.3.6	no						no		2020-07-15	-2	4597566	4598819	1254
738	5	Bacillus albus PFYN01	93129247	SEIR01_690005	CDS	automatic/finished		Isochorismatase family protein		no						no		2022-01-17	-1	1490009	1490653	645
738	5	Bacillus albus PFYN01	93129248	SEIR01_690006	CDS	automatic/finished	ycaC	putative hydrolase		no						no	3 : Putative function from multiple computational evidences	2022-01-17	-3	1490964	1491608	645
738	5	Bacillus thuringiensis C15	93120086	SEIU01_860017	CDS	automatic/finished		Hydrolase		no						no		2022-01-17	-1	3771154	3771798	645
738	5	Bacillus thuringiensis C15	93120087	SEIU01_860018	CDS	automatic/finished	ycaC	putative hydrolase		no						no	3 : Putative function from multiple computational evidences	2022-01-17	-2	3771963	3772607	645
738	5	Pseudomonas sp. B10	93122202	SEIT01_130007	CDS	automatic/finished		Hydrolase		no						no		2022-01-17	-1	548229	548870	642
738	5	Pseudomonas sp. B10	93124498	SEIT01_440005	CDS	automatic/finished	ycaC	putative hydrolase		no						no	3 : Putative function from multiple computational evidences	2022-01-17	-3	3015667	3016293	627
738	5	Pseudomonas sp. B10	93126812	SEIT01_870133	CDS	automatic/finished	ycaC	putative hydrolase		no						no	3 : Putative function from multiple computational evidences	2022-01-17	-1	5489073	5489705	633
738	5	Pseudomonas sp. SWI36 SWI36_1	77225850	SEIS01_1380051	CDS	automatic/finished	ycaC	putative hydrolase		no						no	3 : Putative function from multiple computational evidences	2020-07-15	2	2769251	2769880	630
738	5	Pseudomonas sp. SWI36 SWI36_1	77225857	SEIS01_1380058	CDS	automatic/finished	ycaC	putative hydrolase		no						no	3 : Putative function from multiple computational evidences	2020-07-15	3	2777736	2778365	630
738	5	Pseudomonas sp. SWI36 SWI36_1	77225862	SEIS01_1380063	CDS	automatic/finished	ycaC	putative hydrolase		no						no	3 : Putative function from multiple computational evidences	2020-07-15	3	2783286	2783912	627
738	5	Pseudomonas sp. SWI36 SWI36_1	77226584	SEIS01_1500004	CDS	automatic/finished	ycaC	putative hydrolase		no						no	3 : Putative function from multiple computational evidences	2020-07-15	3	3520785	3521405	621
738	5	Pseudomonas sp. SWI36 SWI36_2	77217895	SEIQ01_20075	CDS	automatic/finished	ycaC	putative hydrolase		no						no	3 : Putative function from multiple computational evidences	2020-07-15	-1	332155	332781	627
738	5	Pseudomonas sp. SWI36 SWI36_2	77217901	SEIQ01_20081	CDS	automatic/finished	ycaC	putative hydrolase		no						no	3 : Putative function from multiple computational evidences	2020-07-15	-1	337702	338331	630
738	5	Pseudomonas sp. SWI36 SWI36_2	77217908	SEIQ01_20088	CDS	automatic/finished	ycaC	putative hydrolase		no						no	3 : Putative function from multiple computational evidences	2020-07-15	-3	346187	346816	630
738	5	Pseudomonas sp. SWI36 SWI36_2	77220657	SEIQ01_1410004	CDS	automatic/finished	ycaC	putative hydrolase		no						no	3 : Putative function from multiple computational evidences	2020-07-15	3	3259770	3260390	621
7392	5	Bacillus albus PFYN01	93128776	SEIR01_460017	CDS	automatic/finished	xpt	xanthine phosphoribosyltransferase	2.4.2.22	no	e : enzyme			16.2 : Construct biomass (Anabolism) ; 16.11 : Scavenge (Catabolism) ;	12923093, 15549109, 19381559, 20108980, 20200045, 32446804, 33225145	no	2a : Function from experimental evidences in other organisms	2022-01-17	-1	1070729	1071322	594
7392	5	Bacillus thuringiensis C15	93121288	SEIU01_1180174	CDS	automatic/finished	xpt	xanthine phosphoribosyltransferase	2.4.2.22	no	e : enzyme			16.2 : Construct biomass (Anabolism) ; 16.11 : Scavenge (Catabolism) ;	12923093, 15549109, 19381559, 20108980, 20200045, 32446804, 33225145	no	2a : Function from experimental evidences in other organisms	2022-01-17	1	4886095	4886688	594
7392	5	Pseudomonas sp. B10	93122696	SEIT01_260094	CDS	automatic/finished	xpt	Xanthine phosphoribosyltransferase	2.4.2.22	no						no		2022-01-17	3	1057641	1058213	573
7392	5	Pseudomonas sp. SWI36 SWI36_1	77225840	SEIS01_1380041	CDS	automatic/finished	xpt	Xanthine phosphoribosyltransferase	2.4.2.22	no						no		2020-07-15	-2	2754459	2755031	573
7392	5	Pseudomonas sp. SWI36 SWI36_2	77220935	SEIQ01_1450040	CDS	automatic/finished	xpt	Xanthine phosphoribosyltransferase	2.4.2.22	no						no		2020-07-15	-1	3545692	3546264	573
7409	5	Bacillus albus PFYN01	93133045	SEIR01_4240014	CDS	automatic/finished		Phosphate transport system permease protein PstA		no						no		2022-01-17	-3	4971678	4972544	867
7409	5	Bacillus thuringiensis C15	93118030	SEIU01_530072	CDS	automatic/finished		Phosphate transport system permease protein PstA		no						no		2022-01-17	1	1780636	1781502	867
7409	5	Pseudomonas sp. B10	93125164	SEIT01_540042	CDS	automatic/finished		phosphate transport system permease protein		no						no		2022-01-17	-2	3710189	3711859	1671
7409	5	Pseudomonas sp. SWI36 SWI36_1	77228052	SEIS01_1900012	CDS	automatic/finished		Phosphate transport system permease protein PstA (TC 3.A.1.7.1)		no						no		2020-07-15	1	5142991	5144661	1671
7409	5	Pseudomonas sp. SWI36 SWI36_2	77222407	SEIQ01_1840012	CDS	automatic/finished		Phosphate transport system permease protein PstA (TC 3.A.1.7.1)		no						no		2020-07-15	3	5108262	5109932	1671
7473	5	Bacillus albus PFYN01	93131742	SEIR01_2570027	CDS	automatic/finished	cat	Succinyl-CoA:coenzyme A transferase	2.8.3.-	no						no		2022-01-17	2	3761180	3762694	1515
7473	5	Bacillus thuringiensis C15	93116345	SEIU01_10174	CDS	automatic/finished	cat	Succinyl-CoA:coenzyme A transferase	2.8.3.-	no						no		2022-01-17	1	160444	161958	1515
7473	5	Pseudomonas sp. B10	93123655	SEIT01_350008	CDS	automatic/finished	cat	Succinyl-CoA:coenzyme A transferase	2.8.3.-	no						no		2022-01-17	1	2128111	2129604	1494
7473	5	Pseudomonas sp. SWI36 SWI36_1	77226872	SEIS01_1560035	CDS	automatic/finished	cat	Succinyl-CoA:coenzyme A transferase	2.8.3.-	no						no		2020-07-15	-1	3817126	3818619	1494
7473	5	Pseudomonas sp. SWI36 SWI36_2	77221193	SEIQ01_1520008	CDS	automatic/finished	cat	Succinyl-CoA:coenzyme A transferase	2.8.3.-	no						no		2020-07-15	2	3823883	3825376	1494
7515	5	Bacillus albus PFYN01	93131193	SEIR01_2120045	CDS	automatic/finished		DJ-1_PfpI domain-containing protein		no						no		2022-01-17	-3	3278757	3279428	672
7515	5	Bacillus thuringiensis C15	93120752	SEIU01_1070014	CDS	automatic/finished		putative intracellular protease/amidase		no						no	3 : Putative function from multiple computational evidences	2022-01-17	1	4399384	4400067	684
7515	5	Bacillus thuringiensis C15	93120754	SEIU01_1070016	CDS	automatic/finished		DJ-1_PfpI domain-containing protein		no						no		2022-01-17	-3	4401032	4401694	663
7515	5	Pseudomonas sp. B10	93122180	SEIT01_60005	CDS	automatic/finished		Type 1 glutamine amidotransferase domain-containing protein		no						no		2022-01-17	-2	525698	526375	678
7515	5	Pseudomonas sp. SWI36 SWI36_1	77224269	SEIS01_460011	CDS	automatic/finished		Type 1 glutamine amidotransferase domain-containing protein		no						no		2020-07-15	3	1168209	1168895	687
7515	5	Pseudomonas sp. SWI36 SWI36_1	77225185	SEIS01_1130021	CDS	automatic/finished		Thiamine biosynthesis protein ThiJ		no						no		2020-07-15	2	2090552	2091355	804
7515	5	Pseudomonas sp. SWI36 SWI36_1	77226593	SEIS01_1500013	CDS	automatic/finished		ThiJ/PfpI family protein		no						no		2020-07-15	1	3531133	3531981	849
7515	5	Pseudomonas sp. SWI36 SWI36_2	77219677	SEIQ01_1240020	CDS	automatic/finished		Thiamine biosynthesis protein ThiJ		no						no		2020-07-15	1	2224195	2224998	804
7515	5	Pseudomonas sp. SWI36 SWI36_2	77220666	SEIQ01_1410013	CDS	automatic/finished		ThiJ/PfpI family protein		no						no		2020-07-15	1	3270118	3270966	849
7515	5	Pseudomonas sp. SWI36 SWI36_2	77222211	SEIQ01_1770054	CDS	automatic/finished		Type 1 glutamine amidotransferase domain-containing protein		no						no		2020-07-15	-2	4892172	4892858	687
7574	5	Bacillus albus PFYN01	93130293	SEIR01_1350017	CDS	automatic/finished	ybjQ	putative heavy metal binding protein YbjQ		no						no	3 : Putative function from multiple computational evidences	2022-01-17	2	2457365	2457676	312
7574	5	Bacillus albus PFYN01	93131762	SEIR01_2570047	CDS	automatic/finished	ybjQ	putative heavy metal binding protein YbjQ		no						no	3 : Putative function from multiple computational evidences	2022-01-17	-3	3783558	3783869	312
7574	5	Bacillus albus PFYN01	93133181	SEIR01_4280020	CDS	automatic/finished	ybjQ	putative heavy metal binding protein YbjQ		no						no	3 : Putative function from multiple computational evidences	2022-01-17	-3	5100171	5100482	312
7574	5	Bacillus thuringiensis C15	93116375	SEIU01_10204	CDS	automatic/finished	ybjQ	putative heavy metal binding protein YbjQ		no						no	3 : Putative function from multiple computational evidences	2022-01-17	-3	194447	194758	312
7574	5	Bacillus thuringiensis C15	93118761	SEIU01_630161	CDS	automatic/finished	ybjQ	putative heavy metal binding protein YbjQ		no						no	3 : Putative function from multiple computational evidences	2022-01-17	-1	2468710	2469021	312
7574	5	Bacillus thuringiensis C15	93119175	SEIU01_700026	CDS	automatic/finished	ybjQ	putative heavy metal binding protein YbjQ		no						no	3 : Putative function from multiple computational evidences	2022-01-17	1	2869087	2869398	312
7574	5	Pseudomonas sp. B10	93123828	SEIT01_360087	CDS	automatic/finished		putative heavy metal binding protein YbjQ		no						no	3 : Putative function from multiple computational evidences	2022-01-17	1	2299426	2299746	321
7574	5	Pseudomonas sp. SWI36 SWI36_1	77225441	SEIS01_1310055	CDS	automatic/finished	ybjQ	putative heavy metal binding protein YbjQ		no						no	3 : Putative function from multiple computational evidences	2020-07-15	-1	2352466	2352786	321
7574	5	Pseudomonas sp. SWI36 SWI36_2	77218465	SEIQ01_320007	CDS	automatic/finished	ybjQ	putative heavy metal binding protein YbjQ		no						no	3 : Putative function from multiple computational evidences	2020-07-15	-1	967120	967440	321
7601	5	Bacillus albus PFYN01	93131910	SEIR01_2790030	CDS	automatic/finished	tcyA	cystine ABC transporter (substrate-binding lipoprotein)		no	t : transporter			16.1 : Circulate ;	15262924, 22212096	no	2a : Function from experimental evidences in other organisms	2022-01-17	1	3926680	3927477	798
7601	5	Bacillus thuringiensis C15	93117815	SEIU01_520131	CDS	automatic/finished	tcyA	cystine ABC transporter (substrate-binding lipoprotein)		no	t : transporter			16.1 : Circulate ;	15262924, 22212096	no	2a : Function from experimental evidences in other organisms	2022-01-17	3	1585854	1586651	798
7601	5	Pseudomonas sp. B10	93121988	SEIT01_10294	CDS	automatic/finished		Transporter substrate-binding domain-containing protein		no						no		2022-01-17	1	321253	321831	579
7601	5	Pseudomonas sp. B10	93125394	SEIT01_570009	CDS	automatic/finished	tcyJ	cystine ABC transporter periplasmic binding protein	7.4.2.12	no						no		2022-01-17	1	3981022	3981822	801
7601	5	Pseudomonas sp. SWI36 SWI36_1	77226332	SEIS01_1460024	CDS	automatic/finished		Amino acid ABC transporter substrate-binding protein (PAAT family)		no						no		2020-07-15	-3	3259010	3259498	489
7601	5	Pseudomonas sp. SWI36 SWI36_1	77226768	SEIS01_1540013	CDS	automatic/finished	tcyJ	cystine ABC transporter periplasmic binding protein	7.4.2.-	no						no		2020-07-15	-2	3714309	3715103	795
7601	5	Pseudomonas sp. SWI36 SWI36_2	77220630	SEIQ01_1400024	CDS	automatic/finished		Amino acid ABC transporter substrate-binding protein (PAAT family)		no						no		2020-07-15	-3	3230738	3231226	489
7601	5	Pseudomonas sp. SWI36 SWI36_2	77221130	SEIQ01_1500028	CDS	automatic/finished	tcyJ	cystine ABC transporter periplasmic binding protein	7.4.2.-	no						no		2020-07-15	3	3759312	3760106	795
7640	5	Bacillus albus PFYN01	93129535	SEIR01_900029	CDS	automatic/finished		iron(III) transport system substrate-binding protein		no						no		2022-01-17	-3	1760019	1761095	1077
7640	5	Bacillus thuringiensis C15	93117147	SEIU01_460051	CDS	automatic/finished		iron(III) transport system substrate-binding protein		no						no		2022-01-17	2	967829	968905	1077
7640	5	Pseudomonas sp. B10	93121966	SEIT01_10272	CDS	automatic/finished		iron(III) transport system substrate-binding protein		no						no		2022-01-17	-2	296705	297730	1026
7640	5	Pseudomonas sp. SWI36 SWI36_1	77226355	SEIS01_1460047	CDS	automatic/finished		Ferric iron ABC transporter, iron-binding protein		no						no		2020-07-15	2	3283043	3284068	1026
7640	5	Pseudomonas sp. SWI36 SWI36_2	77220653	SEIQ01_1400047	CDS	automatic/finished		Ferric iron ABC transporter, iron-binding protein		no						no		2020-07-15	2	3254771	3255796	1026
7641	5	Bacillus albus PFYN01	93129533	SEIR01_900027	CDS	automatic/finished		iron(III) transport system permease protein		no						no		2022-01-17	-2	1757239	1758996	1758
7641	5	Bacillus thuringiensis C15	93117149	SEIU01_460053	CDS	automatic/finished		iron(III) transport system permease protein		no						no		2022-01-17	3	969927	971684	1758
7641	5	Pseudomonas sp. B10	93121967	SEIT01_10273	CDS	automatic/finished		iron(III) transport system permease protein		no						no		2022-01-17	-3	297778	299502	1725
7641	5	Pseudomonas sp. SWI36 SWI36_1	77226354	SEIS01_1460046	CDS	automatic/finished		Ferric iron ABC transporter, permease protein		no						no		2020-07-15	2	3281300	3283024	1725
7641	5	Pseudomonas sp. SWI36 SWI36_2	77220652	SEIQ01_1400046	CDS	automatic/finished		Ferric iron ABC transporter, permease protein		no						no		2020-07-15	2	3253028	3254752	1725
77	5	Bacillus albus PFYN01	93133601	SEIR01_4390027	CDS	automatic/finished	moaC	molybdenum cofactor biosynthesis protein C	4.6.1.17	no	e : enzyme			16.2 : Construct biomass (Anabolism) ;	10903949, 16632608, 18607082, 20606263, 25941396, 26575208	no	2a : Function from experimental evidences in other organisms	2022-01-17	3	5481600	5482085	486
77	5	Bacillus thuringiensis C15	93119273	SEIU01_720035	CDS	automatic/finished	moaC	molybdenum cofactor biosynthesis protein C	4.6.1.17	no	e : enzyme			16.2 : Construct biomass (Anabolism) ;	10903949, 16632608, 18607082, 20606263, 25941396, 26575208	no	2a : Function from experimental evidences in other organisms	2022-01-17	2	2956319	2956804	486
77	5	Pseudomonas sp. B10	93122564	SEIT01_250085	CDS	automatic/finished	moaC	cyclic pyranopterin monophosphate synthase	4.6.1.17	no						no		2022-01-17	1	926101	926574	474
77	5	Pseudomonas sp. B10	93125538	SEIT01_600017	CDS	automatic/finished	moaC	cyclic pyranopterin monophosphate synthase	4.6.1.17	no						no		2022-01-17	2	4147550	4148035	486
77	5	Pseudomonas sp. SWI36 SWI36_1	77225996	SEIS01_1400009	CDS	automatic/finished	moaC	cyclic pyranopterin monophosphate synthase	4.6.1.17	no						no		2020-07-15	-3	2920955	2921425	471
77	5	Pseudomonas sp. SWI36 SWI36_2	77220356	SEIQ01_1350009	CDS	automatic/finished	moaC	cyclic pyranopterin monophosphate synthase	4.6.1.17	no						no		2020-07-15	-2	2952552	2953022	471
772	5	Bacillus albus PFYN01	93130593	SEIR01_1570040	CDS	automatic/finished	xseB	exodeoxyribonuclease VII subunit XseB	3.1.11.6	no						no		2022-01-17	-3	2728743	2728973	231
772	5	Bacillus thuringiensis C15	93120377	SEIU01_960078	CDS	automatic/finished	xseB	exodeoxyribonuclease VII subunit XseB	3.1.11.6	no						no		2022-01-17	3	4055427	4055657	231
772	5	Pseudomonas sp. B10	93125857	SEIT01_650099	CDS	automatic/finished	xseB	exodeoxyribonuclease VII subunit XseB	3.1.11.6	no						no		2022-01-17	2	4467935	4468177	243
772	5	Pseudomonas sp. SWI36 SWI36_1	77228422	SEIS01_2040003	CDS	automatic/finished	xseB	exodeoxyribonuclease VII subunit XseB	3.1.11.6	no						no		2020-07-15	-3	5537483	5537725	243
772	5	Pseudomonas sp. SWI36 SWI36_2	77218567	SEIQ01_350073	CDS	automatic/finished	xseB	exodeoxyribonuclease VII subunit XseB	3.1.11.6	no						no		2020-07-15	3	1084410	1084652	243
782	5	Bacillus albus PFYN01	93128797	SEIR01_460038	CDS	automatic/finished	aspB	anabolic oxaloacetate / glutamate aminotransferase (PLP-dependent)	2.6.1.1	no	e : enzyme			16.2 : Construct biomass (Anabolism) ; 16.11 : Scavenge (Catabolism) ;	418816, 12670965, 22740702	no	2a : Function from experimental evidences in other organisms	2022-01-17	-1	1088927	1090114	1188
782	5	Bacillus albus PFYN01	93129751	SEIR01_1030008	CDS	automatic/finished	dapL	LL-diaminopimelate aminotransferase	2.6.1.83	no						no		2022-01-17	-1	1958720	1959919	1200
782	5	Bacillus albus PFYN01	93132068	SEIR01_3010008	CDS	automatic/finished	alaT	L-alanine aminotransferase	2.6.1.-	no	e : enzyme			16.11 : Scavenge (Catabolism) ;	12670965, 33155333	no	2a : Function from experimental evidences in other organisms	2022-01-17	-3	4051536	4052726	1191
782	5	Bacillus albus PFYN01	93133354	SEIR01_4340018	CDS	automatic/finished	mtnE	methionine-glutamine aminotransferase (PLP-dependent)	2.6.1.1	no	e : enzyme			16.2 : Construct biomass (Anabolism) ; 16.11 : Scavenge (Catabolism) ;	12670965, 15102328, 23429746, 24387040	no	2a : Function from experimental evidences in other organisms	2022-01-17	2	5262929	5264107	1179
782	5	Bacillus albus PFYN01	93133876	SEIR01_4470013	CDS	automatic/finished	dapX	N-acetyl-L,L-diaminopimelate aminotransferase	2.6.1.83	no	e : enzyme			16.2 : Construct biomass (Anabolism) ;	12670965, 14523133, 14627808, 19948795	no	2a : Function from experimental evidences in other organisms	2022-01-17	2	5744468	5745631	1164
782	5	Bacillus thuringiensis C15	93116806	SEIU01_200005	CDS	automatic/finished	dapL	LL-diaminopimelate aminotransferase	2.6.1.83	no						no		2022-01-17	-3	632465	633664	1200
782	5	Bacillus thuringiensis C15	93117073	SEIU01_350110	CDS	automatic/finished	alaT	L-alanine aminotransferase	2.6.1.-	no	e : enzyme			16.11 : Scavenge (Catabolism) ;	12670965, 33155333	no	2a : Function from experimental evidences in other organisms	2022-01-17	1	896701	897891	1191
782	5	Bacillus thuringiensis C15	93119331	SEIU01_740010	CDS	automatic/finished	dapX	N-acetyl-L,L-diaminopimelate aminotransferase	2.6.1.83	no	e : enzyme			16.2 : Construct biomass (Anabolism) ;	12670965, 14523133, 14627808, 19948795	no	2a : Function from experimental evidences in other organisms	2022-01-17	-1	3011407	3012570	1164
782	5	Bacillus thuringiensis C15	93120522	SEIU01_960223	CDS	automatic/finished	mtnE	methionine-glutamine aminotransferase (PLP-dependent)	2.6.1.1	no	e : enzyme			16.2 : Construct biomass (Anabolism) ; 16.11 : Scavenge (Catabolism) ;	12670965, 15102328, 23429746, 24387040	no	2a : Function from experimental evidences in other organisms	2022-01-17	-3	4186658	4187836	1179
782	5	Bacillus thuringiensis C15	93121267	SEIU01_1180153	CDS	automatic/finished	aspB	anabolic oxaloacetate / glutamate aminotransferase (PLP-dependent)	2.6.1.1	no	e : enzyme			16.2 : Construct biomass (Anabolism) ; 16.11 : Scavenge (Catabolism) ;	418816, 12670965, 22740702	no	2a : Function from experimental evidences in other organisms	2022-01-17	2	4867295	4868482	1188
782	5	Pseudomonas sp. B10	93126657	SEIT01_850020	CDS	automatic/finished	alaC	glutamate--pyruvate aminotransferase AlaC	2.6.1.2	no						no		2022-01-17	3	5331750	5332958	1209
782	5	Pseudomonas sp. SWI36 SWI36_1	77226261	SEIS01_1450008	CDS	automatic/finished	alaC	glutamate--pyruvate aminotransferase AlaC	2.6.1.2	no						no		2020-07-15	3	3189687	3190895	1209
782	5	Pseudomonas sp. SWI36 SWI36_2	77220559	SEIQ01_1390007	CDS	automatic/finished	alaC	glutamate--pyruvate aminotransferase AlaC	2.6.1.2	no						no		2020-07-15	3	3161415	3162623	1209
80	5	Bacillus albus PFYN01	93128723	SEIR01_440002	CDS	automatic/finished		Paraslipin		no						no		2022-01-17	1	1033678	1034646	969
80	5	Bacillus thuringiensis C15	93117512	SEIU01_490083	CDS	automatic/finished		Paraslipin		no						no		2022-01-17	1	1303561	1304529	969
80	5	Pseudomonas sp. B10	93125477	SEIT01_580046	CDS	automatic/finished		PHB domain-containing protein		no						no		2022-01-17	2	4068464	4069222	759
80	5	Pseudomonas sp. SWI36 SWI36_1	77225758	SEIS01_1370016	CDS	automatic/finished		Membrane protein		no						no		2020-07-15	-1	2676031	2676885	855
80	5	Pseudomonas sp. SWI36 SWI36_1	77226888	SEIS01_1570009	CDS	automatic/finished		Putative stomatin/prohibitin-family membrane protease subunit aq_911		no						no	3 : Putative function from multiple computational evidences	2020-07-15	3	3834858	3835613	756
80	5	Pseudomonas sp. SWI36 SWI36_2	77220781	SEIQ01_1430042	CDS	automatic/finished		SPFH/Band 7/PHB domain protein		no						no		2020-07-15	1	3389443	3390297	855
80	5	Pseudomonas sp. SWI36 SWI36_2	77221441	SEIQ01_1560029	CDS	automatic/finished		Putative stomatin/prohibitin-family membrane protease subunit aq_911		no						no	3 : Putative function from multiple computational evidences	2020-07-15	-2	4075965	4076720	756
803	5	Bacillus albus PFYN01	93128602	SEIR01_350069	CDS	automatic/finished		putative pterin-4-alpha-carbinolamine dehydratase	4.2.1.96	no						no	3 : Putative function from multiple computational evidences	2022-01-17	3	916389	916703	315
803	5	Bacillus thuringiensis C15	93116757	SEIU01_130113	CDS	automatic/finished		putative pterin-4-alpha-carbinolamine dehydratase	4.2.1.96	no						no	3 : Putative function from multiple computational evidences	2022-01-17	-3	585431	585745	315
803	5	Pseudomonas sp. B10	93123874	SEIT01_370039	CDS	automatic/finished		putative pterin-4-alpha-carbinolamine dehydratase	4.2.1.96	no						no	3 : Putative function from multiple computational evidences	2022-01-17	-3	2342863	2343219	357
803	5	Pseudomonas sp. SWI36 SWI36_1	77224318	SEIS01_470001	CDS	automatic/finished		Putative pterin-4-alpha-carbinolamine dehydratase	4.2.1.96	no						no	3 : Putative function from multiple computational evidences	2020-07-15	-2	1229694	1230050	357
803	5	Pseudomonas sp. SWI36 SWI36_2	77218644	SEIQ01_430001	CDS	automatic/finished		Putative pterin-4-alpha-carbinolamine dehydratase	4.2.1.96	no						no	3 : Putative function from multiple computational evidences	2020-07-15	-2	1170693	1171049	357
804	5	Bacillus albus PFYN01	93128462	SEIR01_290012	CDS	automatic/finished	tsaD	tRNA(NNU) t(6)A37 threonylcarbamoyladenosine modification; glycation binding protein		no	e : enzyme			16.2 : Construct biomass (Anabolism) ; 16.6 : Maintain ;	9743119, 11073929, 12682299, 19376873, 19578062, 20701780, 20824107, 21183954, 21285948, 21625506, 21873492, 22378793, 31118925, 33101263	no	2a : Function from experimental evidences in other organisms	2022-01-17	-3	787506	788522	1017
804	5	Bacillus thuringiensis C15	93120956	SEIU01_1080011	CDS	automatic/finished	tsaD	tRNA(NNU) t(6)A37 threonylcarbamoyladenosine modification; glycation binding protein		no	e : enzyme			16.2 : Construct biomass (Anabolism) ; 16.6 : Maintain ;	9743119, 11073929, 12682299, 19376873, 19578062, 20701780, 20824107, 21183954, 21285948, 21625506, 21873492, 22378793, 31118925, 33101263	no	2a : Function from experimental evidences in other organisms	2022-01-17	-3	4593152	4594168	1017
804	5	Pseudomonas sp. B10	93121743	SEIT01_10049	CDS	automatic/finished	tsaD	N(6)-L-threonylcarbamoyladenine synthase, TsaD subunit	2.3.1.234	no						no		2022-01-17	-1	50352	51377	1026
804	5	Pseudomonas sp. SWI36 SWI36_1	77226638	SEIS01_1510011	CDS	automatic/finished	tsaD	N(6)-L-threonylcarbamoyladenine synthase, TsaD subunit	2.3.1.234	no						no		2020-07-15	-2	3574626	3575651	1026
804	5	Pseudomonas sp. SWI36 SWI36_2	77220729	SEIQ01_1420030	CDS	automatic/finished	tsaD	N(6)-L-threonylcarbamoyladenine synthase, TsaD subunit	2.3.1.234	no						no		2020-07-15	1	3338887	3339912	1026
81	5	Bacillus albus PFYN01	93132489	SEIR01_3460004	CDS	automatic/finished	vbfA	acetate Na+-dependent symporter subunit involved in volatile signal for biofilm formation		no	t : transporter			16.1 : Circulate ;	15849754, 16850406, 26060272, 28357266	no	2a : Function from experimental evidences in other organisms	2022-01-17	-3	4421985	4423535	1551
81	5	Bacillus thuringiensis C15	93118882	SEIU01_640029	CDS	automatic/finished	vbfA	acetate Na+-dependent symporter subunit involved in volatile signal for biofilm formation		no	t : transporter			16.1 : Circulate ;	15849754, 16850406, 26060272, 28357266	no	2a : Function from experimental evidences in other organisms	2022-01-17	2	2599382	2600932	1551
81	5	Pseudomonas sp. B10	93125581	SEIT01_610001	CDS	automatic/finished	actP	acetate/glycolate:cation symporter		no						no		2022-01-17	-2	4179641	4181299	1659
81	5	Pseudomonas sp. SWI36 SWI36_1	77223306	SEIS01_10163	CDS	automatic/finished	actP	acetate/glycolate:cation symporter		no						no		2020-07-15	-3	158633	160195	1563
81	5	Pseudomonas sp. SWI36 SWI36_1	77224619	SEIS01_680053	CDS	automatic/finished	actP	acetate/glycolate:cation symporter		no						no		2020-07-15	-2	1541607	1543271	1665
81	5	Pseudomonas sp. SWI36 SWI36_2	77219282	SEIQ01_900053	CDS	automatic/finished	actP	acetate/glycolate:cation symporter		no						no		2020-07-15	-2	1846386	1848050	1665
81	5	Pseudomonas sp. SWI36 SWI36_2	77220263	SEIQ01_1330089	CDS	automatic/finished	actP	acetate/glycolate:cation symporter		no						no		2020-07-15	3	2856201	2857763	1563
818	5	Bacillus albus PFYN01	93128326	SEIR01_240025	CDS	automatic/finished	ylmE	putative PLP-containing enzyme		no	e : enzyme			16.6 : Maintain ; 16.13 : Shape ;	14526035, 24097949, 29202109, 29743540	no	3 : Putative function from multiple computational evidences	2022-01-17	-1	665027	665701	675
818	5	Bacillus thuringiensis C15	93119443	SEIU01_740122	CDS	automatic/finished	ylmE	putative PLP-containing enzyme		no	e : enzyme			16.6 : Maintain ; 16.13 : Shape ;	14526035, 24097949, 29202109, 29743540	no	3 : Putative function from multiple computational evidences	2022-01-17	2	3114668	3115342	675
818	5	Pseudomonas sp. B10	93121919	SEIT01_10225	CDS	automatic/finished	yggS	PLP homeostasis protein		no						no		2022-01-17	2	252200	252886	687
818	5	Pseudomonas sp. SWI36 SWI36_1	77224540	SEIS01_640009	CDS	automatic/finished	yggS	PLP homeostasis protein		no						no		2020-07-15	-2	1455378	1456064	687
818	5	Pseudomonas sp. SWI36 SWI36_2	77218979	SEIQ01_620009	CDS	automatic/finished	yggS	PLP homeostasis protein		no						no		2020-07-15	-3	1495403	1496089	687
838	5	Bacillus albus PFYN01	93130712	SEIR01_1680027	CDS	automatic/finished	gatC	glutamyl-tRNA(Gln) amidotransferase (subunit C)	6.3.5.7	no	e : enzyme			16.2 : Construct biomass (Anabolism) ;	9342321, 11445070, 12682299, 25005615	no	2a : Function from experimental evidences in other organisms	2022-01-17	-2	2832844	2833134	291
838	5	Bacillus thuringiensis C15	93119893	SEIU01_850032	CDS	automatic/finished	gatC	glutamyl-tRNA(Gln) amidotransferase (subunit C)	6.3.5.7	no	e : enzyme			16.2 : Construct biomass (Anabolism) ;	9342321, 11445070, 12682299, 25005615	no	2a : Function from experimental evidences in other organisms	2022-01-17	2	3572687	3572977	291
838	5	Pseudomonas sp. B10	93124323	SEIT01_430042	CDS	automatic/finished	gatC	Aspartyl/glutamyl-tRNA(Asn/Gln) amidotransferase subunit C	6.3.5.-	no						no		2022-01-17	3	2820039	2820326	288
838	5	Pseudomonas sp. SWI36 SWI36_1	77224721	SEIS01_790041	CDS	automatic/finished	gatC	Aspartyl/glutamyl-tRNA(Asn/Gln) amidotransferase subunit C	6.3.5.-	no						no		2020-07-15	-3	1661225	1661512	288
838	5	Pseudomonas sp. SWI36 SWI36_2	77219352	SEIQ01_1010036	CDS	automatic/finished	gatC	Aspartyl/glutamyl-tRNA(Asn/Gln) amidotransferase subunit C	6.3.5.-	no						no		2020-07-15	1	1913311	1913598	288
8424	5	Bacillus albus PFYN01	93133869	SEIR01_4470006	CDS	automatic/finished	metE	cobalamin-independent methionine synthase	2.1.1.14	no	e : enzyme			16.2 : Construct biomass (Anabolism) ;	8755891, 10094622, 12910260, 16086852, 16194229, 17012790, 17611193, 21749987, 22938038, 24313874	no	2a : Function from experimental evidences in other organisms	2022-01-17	3	5738358	5740646	2289
8424	5	Bacillus thuringiensis C15	93119338	SEIU01_740017	CDS	automatic/finished	metE	cobalamin-independent methionine synthase	2.1.1.14	no	e : enzyme			16.2 : Construct biomass (Anabolism) ;	8755891, 10094622, 12910260, 16086852, 16194229, 17012790, 17611193, 21749987, 22938038, 24313874	no	2a : Function from experimental evidences in other organisms	2022-01-17	-2	3016392	3018680	2289
8424	5	Pseudomonas sp. B10	93123559	SEIT01_340006	CDS	automatic/finished	metE	cobalamin-independent homocysteine transmethylase	2.1.1.14	no						no		2022-01-17	3	2033190	2035502	2313
8424	5	Pseudomonas sp. SWI36 SWI36_1	77225582	SEIS01_1340017	CDS	automatic/finished		5-methyltetrahydropteroyltriglutamate--homocysteine methyltransferase		no						no		2020-07-15	-2	2496570	2497394	825
8424	5	Pseudomonas sp. SWI36 SWI36_2	77220001	SEIQ01_1290040	CDS	automatic/finished		5-methyltetrahydropteroyltriglutamate--homocysteine methyltransferase		no						no		2020-07-15	1	2579494	2580318	825
848	5	Bacillus albus PFYN01	93127593	SEIR01_10032	CDS	automatic/finished	nuoH	NADH:quinone oxidoreductase subunit H	7.1.1.2	no						no		2022-01-17	-1	30152	31153	1002
848	5	Bacillus thuringiensis C15	93119633	SEIU01_760034	CDS	automatic/finished	nuoH	NADH:quinone oxidoreductase subunit H	7.1.1.2	no						no		2022-01-17	-3	3298448	3299449	1002
848	5	Pseudomonas sp. B10	93127095	SEIT01_980082	CDS	automatic/finished	nuoH	NADH:quinone oxidoreductase subunit H	7.1.1.2	no						no		2022-01-17	-2	5792834	5793841	1008
848	5	Pseudomonas sp. SWI36 SWI36_1	77225351	SEIS01_1300022	CDS	automatic/finished	nuoH	NADH:quinone oxidoreductase subunit H	1.6.5.-, 7.1.1.2	no						no		2020-07-15	3	2257752	2258759	1008
848	5	Pseudomonas sp. SWI36 SWI36_2	77219838	SEIQ01_1260035	CDS	automatic/finished	nuoH	NADH:quinone oxidoreductase subunit H	1.6.5.-, 7.1.1.2	no						no		2020-07-15	-2	2386470	2387477	1008
850	5	Bacillus albus PFYN01	93127589	SEIR01_10028	CDS	automatic/finished	ndhF	NAD(P)H-quinone oxidoreductase chain 5	7.1.1.-	no						no		2022-01-17	-3	26985	28847	1863
850	5	Bacillus thuringiensis C15	93119629	SEIU01_760030	CDS	automatic/finished	ndhF	NAD(P)H-quinone oxidoreductase chain 5	7.1.1.-	no						no		2022-01-17	-1	3295282	3297144	1863
850	5	Pseudomonas sp. B10	93127091	SEIT01_980078	CDS	automatic/finished	nuoL	NADH:quinone oxidoreductase subunit L	7.1.1.2	no						no		2022-01-17	-3	5789602	5791455	1854
850	5	Pseudomonas sp. SWI36 SWI36_1	77225355	SEIS01_1300026	CDS	automatic/finished	nuoL	NADH:quinone oxidoreductase subunit L	1.6.5.-, 7.1.1.2	no						no		2020-07-15	2	2260139	2261992	1854
850	5	Pseudomonas sp. SWI36 SWI36_2	77219834	SEIQ01_1260031	CDS	automatic/finished	nuoL	NADH:quinone oxidoreductase subunit L	1.6.5.-, 7.1.1.2	no						no		2020-07-15	-1	2383237	2385090	1854
852	5	Bacillus albus PFYN01	93132088	SEIR01_3010028	CDS	automatic/finished	pepA	cytosol aminopeptidase	3.4.11.1	no	e : enzyme			16.6 : Maintain ; 16.11 : Scavenge (Catabolism) ;	8057849, 9864319, 10449417, 26936797	no	2a : Function from experimental evidences in other organisms	2022-01-17	-2	4069396	4070880	1485
852	5	Bacillus thuringiensis C15	93117048	SEIU01_350085	CDS	automatic/finished	pepA	cytosol aminopeptidase	3.4.11.1	no	e : enzyme			16.6 : Maintain ; 16.11 : Scavenge (Catabolism) ;	8057849, 9864319, 10449417, 26936797	no	2a : Function from experimental evidences in other organisms	2022-01-17	2	874022	875506	1485
852	5	Pseudomonas sp. B10	93122591	SEIT01_250112	CDS	automatic/finished	pepA	aminopeptidase A/I	3.4.11.1	no						no		2022-01-17	-3	950551	952041	1491
852	5	Pseudomonas sp. SWI36 SWI36_1	77223547	SEIS01_70012	CDS	automatic/finished	pepA	aminopeptidase A/I	3.4.11.1	no						no		2020-07-15	-1	412378	413871	1494
852	5	Pseudomonas sp. SWI36 SWI36_2	77218056	SEIQ01_110012	CDS	automatic/finished	pepA	aminopeptidase A/I	3.4.11.1	no						no		2020-07-15	-3	504317	505810	1494
8645	5	Bacillus albus PFYN01	93128630	SEIR01_360005	CDS	automatic/finished		catalase	1.11.1.6	no						no		2022-01-17	1	940528	941907	1380
8645	5	Bacillus albus PFYN01	93131900	SEIR01_2790020	CDS	automatic/finished	katE	catalase 2	1.11.1.6	no	e : enzyme			16.8 : Protect ;	7559348, 8931328, 16151211	no	2a : Function from experimental evidences in other organisms	2022-01-17	-3	3913779	3915776	1998
8645	5	Bacillus albus PFYN01	93132399	SEIR01_3340120	CDS	automatic/finished	katX	major catalase in spores	1.11.1.6	no	e : enzyme			16.8 : Protect ;	9393707, 9555886, 10503549, 24123749	no	2a : Function from experimental evidences in other organisms	2022-01-17	-1	4357355	4358821	1467
8645	5	Bacillus thuringiensis C15	93117805	SEIU01_520121	CDS	automatic/finished	katE	catalase 2	1.11.1.6	no	e : enzyme			16.8 : Protect ;	7559348, 8931328, 16151211	no	2a : Function from experimental evidences in other organisms	2022-01-17	-2	1572939	1574936	1998
8645	5	Bacillus thuringiensis C15	93118249	SEIU01_570003	CDS	automatic/finished	katX	major catalase in spores	1.11.1.6	no	e : enzyme			16.8 : Protect ;	9393707, 9555886, 10503549, 24123749	no	2a : Function from experimental evidences in other organisms	2022-01-17	-2	1989945	1991411	1467
8645	5	Bacillus thuringiensis C15	93119788	SEIU01_820014	CDS	automatic/finished		catalase	1.11.1.6	no						no		2022-01-17	3	3472161	3473540	1380
8645	5	Pseudomonas sp. B10	93122055	SEIT01_20038	CDS	automatic/finished	katB	Catalase	1.11.1.6	no						no		2022-01-17	2	389816	391354	1539
8645	5	Pseudomonas sp. B10	93123702	SEIT01_350055	CDS	automatic/finished	katE	catalase HPII	1.11.1.6	no						no		2022-01-17	1	2170015	2172156	2142
8645	5	Pseudomonas sp. B10	93125515	SEIT01_590033	CDS	automatic/finished	katA	Catalase	1.11.1.6	no						no		2022-01-17	-2	4113116	4114549	1434
8645	5	Pseudomonas sp. B10	93125905	SEIT01_650147	CDS	automatic/finished	cat	Catalase	1.11.1.6	no						no		2022-01-17	-1	4516629	4518083	1455
8645	5	Pseudomonas sp. SWI36 SWI36_1	77223912	SEIS01_240046	CDS	automatic/finished	katA	Catalase	1.11.1.6	no						no		2020-07-15	2	772694	774133	1440
8645	5	Pseudomonas sp. SWI36 SWI36_1	77224018	SEIS01_290010	CDS	automatic/finished	katE	catalase II	1.11.1.6	no						no		2020-07-15	-2	883494	885629	2136
8645	5	Pseudomonas sp. SWI36 SWI36_2	77218443	SEIQ01_300010	CDS	automatic/finished	katE	catalase II	1.11.1.6	no						no		2020-07-15	-3	944294	946429	2136
8645	5	Pseudomonas sp. SWI36 SWI36_2	77218890	SEIQ01_570046	CDS	automatic/finished	katA	Catalase	1.11.1.6	no						no		2020-07-15	3	1411080	1412519	1440
8646	5	Bacillus albus PFYN01	93132730	SEIR01_3900030	CDS	automatic/finished	glpF	glycerol permease		no	t : transporter			16.1 : Circulate ;	11929549, 15849754, 16850406	no	2a : Function from experimental evidences in other organisms	2022-01-17	-1	4668992	4669813	822
8646	5	Bacillus thuringiensis C15	93121057	SEIU01_1140010	CDS	automatic/finished	glpF	glycerol permease		no	t : transporter			16.1 : Circulate ;	11929549, 15849754, 16850406	no	2a : Function from experimental evidences in other organisms	2022-01-17	-1	4678072	4678893	822
8646	5	Pseudomonas sp. B10	93123571	SEIT01_340018	CDS	automatic/finished	glpF	glycerol facilitator		no						no		2022-01-17	-3	2048227	2049078	852
8646	5	Pseudomonas sp. SWI36 SWI36_1	77224822	SEIS01_900027	CDS	automatic/finished	glpF	glycerol facilitator		no						no		2020-07-15	1	1755658	1756509	852
8646	5	Pseudomonas sp. SWI36 SWI36_2	77220425	SEIQ01_1360025	CDS	automatic/finished	glpF	glycerol facilitator		no						no		2020-07-15	-3	3031829	3032680	852
8696	5	Bacillus albus PFYN01	93134407	SEIR01_4650015	CDS	automatic/finished	tcyP	(sodium)-cystine symporter		no	t : transporter			16.1 : Circulate ;	12193636, 15262924, 15849754, 16513748, 16850406, 19508281	no	2a : Function from experimental evidences in other organisms	2022-01-17	2	6202925	6204319	1395
8696	5	Bacillus thuringiensis C15	93120309	SEIU01_960010	CDS	automatic/finished	tcyP	(sodium)-cystine symporter		no	t : transporter			16.1 : Circulate ;	12193636, 15262924, 15849754, 16513748, 16850406, 19508281	no	2a : Function from experimental evidences in other organisms	2022-01-17	-1	4007677	4009071	1395
8696	5	Pseudomonas sp. B10	93121960	SEIT01_10266	CDS	automatic/finished	tcyP	cystine/sulfocysteine:cation symporter		no						no		2022-01-17	2	290051	291439	1389
8696	5	Pseudomonas sp. SWI36 SWI36_1	77227944	SEIS01_1860004	CDS	automatic/finished	tcyP	cystine/sulfocysteine:cation symporter		no						no		2020-07-15	-1	5025928	5027319	1392
8696	5	Pseudomonas sp. SWI36 SWI36_2	77218778	SEIQ01_490008	CDS	automatic/finished	tcyP	cystine/sulfocysteine:cation symporter		no						no		2020-07-15	2	1312442	1313833	1392
8737	5	Bacillus albus PFYN01	93132221	SEIR01_3230008	CDS	automatic/finished	rbsD	D-ribose pyranase	5.4.99.62	no	e : enzyme			16.1 : Circulate ;	7921236, 12738765, 21276853	no	2a : Function from experimental evidences in other organisms	2022-01-17	-2	4185913	4186308	396
8737	5	Bacillus thuringiensis C15	93121459	SEIU01_1290015	CDS	automatic/finished	rbsD	D-ribose pyranase	5.4.99.62	no	e : enzyme			16.1 : Circulate ;	7921236, 12738765, 21276853	no	2a : Function from experimental evidences in other organisms	2022-01-17	-2	5040453	5040848	396
8737	5	Pseudomonas sp. B10	93124546	SEIT01_440053	CDS	automatic/finished	rbsD	D-ribose pyranase	5.4.99.62	no						no		2022-01-17	-1	3065616	3066020	405
8737	5	Pseudomonas sp. SWI36 SWI36_1	77226462	SEIS01_1490012	CDS	automatic/finished	rbsD	D-ribose pyranase	5.4.99.62	no						no		2020-07-15	3	3392829	3393227	399
8737	5	Pseudomonas sp. SWI36 SWI36_2	77217702	SEIQ01_10127	CDS	automatic/finished	rbsD	D-ribose pyranase	5.4.99.62	no						no		2020-07-15	2	134309	134707	399
8757	5	Bacillus albus PFYN01	93131128	SEIR01_2060003	CDS	automatic/finished	sdaC	L-serine:H(+) symporter SdaC		no						no		2022-01-17	3	3211752	3213071	1320
8757	5	Bacillus albus PFYN01	93132272	SEIR01_3300001	CDS	automatic/finished	sdaC	L-serine:H(+) symporter SdaC		no						no		2022-01-17	2	4235159	4236478	1320
8757	5	Bacillus thuringiensis C15	93117398	SEIU01_480072	CDS	automatic/finished	sdaC	L-serine:H(+) symporter SdaC		no						no		2022-01-17	-1	1200394	1201713	1320
8757	5	Bacillus thuringiensis C15	93121409	SEIU01_1260003	CDS	automatic/finished	sdaC	L-serine:H(+) symporter SdaC		no						no		2022-01-17	1	4992214	4993533	1320
8757	5	Pseudomonas sp. B10	93122522	SEIT01_250043	CDS	automatic/finished	sdaC	L-serine:H(+) symporter SdaC		no						no		2022-01-17	-1	876375	877676	1302
8757	5	Pseudomonas sp. B10	93123079	SEIT01_300012	CDS	automatic/finished	sdaC	L-serine:H(+) symporter SdaC		no						no		2022-01-17	2	1499606	1500886	1281
8757	5	Pseudomonas sp. SWI36 SWI36_1	77227337	SEIS01_1680026	CDS	automatic/finished	sdaC	serine:H(+) symporter SdaC		no						no		2020-07-15	-3	4352777	4354057	1281
8757	5	Pseudomonas sp. SWI36 SWI36_2	77220302	SEIQ01_1340002	CDS	automatic/finished	sdaC	serine:H(+) symporter SdaC		no						no		2020-07-15	2	2888165	2889445	1281
8818	5	Bacillus albus PFYN01	93132230	SEIR01_3230017	CDS	automatic/finished	ybaR	putative permease		no	t : transporter			16.1 : Circulate ;	15849754, 16850406	no	3 : Putative function from multiple computational evidences	2022-01-17	-1	4192961	4194412	1452
8818	5	Bacillus thuringiensis C15	93121468	SEIU01_1290024	CDS	automatic/finished	ybaR	putative permease		no	t : transporter			16.1 : Circulate ;	15849754, 16850406	no	3 : Putative function from multiple computational evidences	2022-01-17	-1	5047501	5048952	1452
8818	5	Pseudomonas sp. B10	93127148	SEIT01_980135	CDS	automatic/finished	ybaR	putative sulfate transporter YbaR		no						no	3 : Putative function from multiple computational evidences	2022-01-17	2	5843054	5844499	1446
8818	5	Pseudomonas sp. SWI36 SWI36_1	77225339	SEIS01_1300010	CDS	automatic/finished	ybaR	Putative sulfate transporter YbaR		no						no	3 : Putative function from multiple computational evidences	2020-07-15	-2	2241582	2243024	1443
8818	5	Pseudomonas sp. SWI36 SWI36_2	77219850	SEIQ01_1260047	CDS	automatic/finished	ybaR	Putative sulfate transporter YbaR		no						no	3 : Putative function from multiple computational evidences	2020-07-15	3	2402205	2403647	1443
8869	5	Bacillus albus PFYN01	93132130	SEIR01_3110003	CDS	automatic/finished	yplQ	putative membrane hydrolase		no	e : enzyme			16.8 : Protect ;	15849754, 16585774, 16850406, 19763274	no	3 : Putative function from multiple computational evidences	2022-01-17	-3	4114623	4115279	657
8869	5	Bacillus albus PFYN01	93134741	SEIR01_4770018	CDS	automatic/finished		hemolysin III		no						no		2022-01-17	2	6503453	6504100	648
8869	5	Bacillus thuringiensis C15	93117537	SEIU01_500017	CDS	automatic/finished	yplQ	putative membrane hydrolase		no	e : enzyme			16.8 : Protect ;	15849754, 16585774, 16850406, 19763274	no	3 : Putative function from multiple computational evidences	2022-01-17	-3	1326032	1326688	657
8869	5	Bacillus thuringiensis C15	93119827	SEIU01_830030	CDS	automatic/finished		hemolysin III		no						no		2022-01-17	1	3511939	3512586	648
8869	5	Pseudomonas sp. B10	93121890	SEIT01_10196	CDS	automatic/finished		Hemolysin-3		no						no		2022-01-17	-1	224277	224894	618
8869	5	Pseudomonas sp. SWI36 SWI36_1	77227258	SEIS01_1660014	CDS	automatic/finished		Hemolysin-3		no						no		2020-07-15	3	4262412	4263029	618
8869	5	Pseudomonas sp. SWI36 SWI36_2	77220053	SEIQ01_1300036	CDS	automatic/finished		Hemolysin-3		no						no		2020-07-15	3	2630538	2631155	618
8874	5	Bacillus albus PFYN01	93129045	SEIR01_570068	CDS	automatic/finished	glxK	D-glycerate kinase	2.7.1.31	no	e : enzyme			16.11 : Scavenge (Catabolism) ;	15771780, 18326573	no	2a : Function from experimental evidences in other organisms	2022-01-17	-3	1312227	1313372	1146
8874	5	Bacillus thuringiensis C15	93118187	SEIU01_560001	CDS	automatic/finished	glxK	D-glycerate kinase	2.7.1.31	no	e : enzyme			16.11 : Scavenge (Catabolism) ;	15771780, 18326573	no	2a : Function from experimental evidences in other organisms	2022-01-17	1	1924414	1925559	1146
8874	5	Pseudomonas sp. B10	93122476	SEIT01_240127	CDS	automatic/finished	garK	glycerate 2-kinase 1	2.7.1.165	no						no		2022-01-17	-3	829780	830919	1140
8874	5	Pseudomonas sp. SWI36 SWI36_1	77223217	SEIS01_10074	CDS	automatic/finished	glxK	Glycerate kinase	2.7.1.31	no						no		2020-07-15	1	78220	79359	1140
8874	5	Pseudomonas sp. SWI36 SWI36_2	77219623	SEIQ01_1130053	CDS	automatic/finished	glxK	Glycerate kinase	2.7.1.31	no						no		2020-07-15	-2	2177337	2178476	1140
9135	5	Bacillus albus PFYN01	93130694	SEIR01_1680009	CDS	automatic/finished		DUF1456 family protein		no						no		2022-01-17	-3	2813358	2813876	519
9135	5	Bacillus thuringiensis C15	93119910	SEIU01_850049	CDS	automatic/finished		Cytoplasmic protein		no						no		2022-01-17	3	3591951	3592469	519
9135	5	Pseudomonas sp. B10	93125660	SEIT01_620032	CDS	automatic/finished	yehS	DUF1456 domain-containing protein YehS		no						no		2022-01-17	2	4257866	4258333	468
9135	5	Pseudomonas sp. SWI36 SWI36_1	77223513	SEIS01_50009	CDS	automatic/finished		conserved protein of unknown function		no	u : unknown	1 : Unknown				no	4 : Unknown function but conserved in other organisms	2020-07-15	3	377217	377678	462
9135	5	Pseudomonas sp. SWI36 SWI36_2	77218014	SEIQ01_80009	CDS	automatic/finished		conserved protein of unknown function		no	u : unknown	1 : Unknown				no	4 : Unknown function but conserved in other organisms	2020-07-15	2	452114	452575	462
916	5	Bacillus albus PFYN01	93127629	SEIR01_10068	CDS	automatic/finished	rpmEB	ribosomal protein L31		no	f : factor			16.2 : Construct biomass (Anabolism) ;	15049826, 16014871, 16547061, 19648245, 20208344	no	2a : Function from experimental evidences in other organisms	2022-01-17	-3	60198	60443	246
916	5	Bacillus thuringiensis C15	93116467	SEIU01_20034	CDS	automatic/finished	rpmEB	ribosomal protein L31		no	f : factor			16.2 : Construct biomass (Anabolism) ;	15049826, 16014871, 16547061, 19648245, 20208344	no	2a : Function from experimental evidences in other organisms	2022-01-17	-2	280041	280286	246
916	5	Pseudomonas sp. B10	93123325	SEIT01_320056	CDS	automatic/finished	rpmE	50S ribosomal subunit protein L31		no						no		2022-01-17	2	1761647	1761865	219
916	5	Pseudomonas sp. SWI36 SWI36_1	77226134	SEIS01_1420039	CDS	automatic/finished	rpmE	50S ribosomal subunit protein L31		no						no		2020-07-15	-3	3076256	3076471	216
916	5	Pseudomonas sp. SWI36 SWI36_2	77219956	SEIQ01_1280039	CDS	automatic/finished	rpmE	50S ribosomal subunit protein L31		no						no		2020-07-15	-3	2526458	2526673	216
9160	5	Bacillus albus PFYN01	93129225	SEIR01_680056	CDS	automatic/finished		HD domain-containing protein		no						no		2022-01-17	2	1461182	1461829	648
9160	5	Bacillus thuringiensis C15	93121380	SEIU01_1230014	CDS	automatic/finished	hdhQ	Mn(2+)-dependent (deoxy)ribonucleoside pyrophosphohydrolase	3.6.1.-	no	e : enzyme			16.11 : Scavenge (Catabolism) ;	25005104, 27062940	no	2a : Function from experimental evidences in other organisms	2022-01-17	-1	4965448	4966095	648
9160	5	Pseudomonas sp. B10	93125005	SEIT01_510061	CDS	automatic/finished		Phosphohydrolase		no						no		2022-01-17	-2	3550751	3551419	669
9160	5	Pseudomonas sp. SWI36 SWI36_1	77226494	SEIS01_1490044	CDS	automatic/finished		Phosphohydrolase		no						no		2020-07-15	1	3414859	3415515	657
9160	5	Pseudomonas sp. SWI36 SWI36_2	77217735	SEIQ01_10160	CDS	automatic/finished		Phosphohydrolase		no						no		2020-07-15	3	156339	156995	657
92	5	Bacillus albus PFYN01	93132315	SEIR01_3340036	CDS	automatic/finished	trpB	tryptophan synthase (beta subunit)	4.2.1.20	no	e : enzyme			16.2 : Construct biomass (Anabolism) ;	2422155, 3062311, 9383185, 10714985, 12963367, 17114058, 17555270	no	2a : Function from experimental evidences in other organisms	2022-01-17	-3	4281003	4282196	1194
92	5	Bacillus thuringiensis C15	93118095	SEIU01_540052	CDS	automatic/finished	trpB	tryptophan synthase (beta subunit)	4.2.1.20	no	e : enzyme			16.2 : Construct biomass (Anabolism) ;	2422155, 3062311, 9383185, 10714985, 12963367, 17114058, 17555270	no	2a : Function from experimental evidences in other organisms	2022-01-17	2	1836095	1837288	1194
92	5	Pseudomonas sp. B10	93123663	SEIT01_350016	CDS	automatic/finished	trpB	tryptophan synthase subunit beta	4.2.1.122, 4.2.1.20	no						no		2022-01-17	-2	2134961	2136208	1248
92	5	Pseudomonas sp. SWI36 SWI36_1	77225145	SEIS01_1120147	CDS	automatic/finished	trpB	tryptophan synthase subunit beta	4.2.1.122, 4.2.1.20	no						no		2020-07-15	-1	2060578	2061795	1218
92	5	Pseudomonas sp. SWI36 SWI36_2	77219427	SEIQ01_1120020	CDS	automatic/finished	trpB	tryptophan synthase subunit beta	4.2.1.122, 4.2.1.20	no						no		2020-07-15	3	1985469	1986686	1218
928	5	Bacillus albus PFYN01	93132316	SEIR01_3340037	CDS	automatic/finished	trpF	N-(5'-phosphoribosyl)anthranilate isomerase	5.3.1.24	no						no		2022-01-17	-1	4282193	4282807	615
928	5	Bacillus thuringiensis C15	93118094	SEIU01_540051	CDS	automatic/finished	trpF	N-(5'-phosphoribosyl)anthranilate isomerase	5.3.1.24	no						no		2022-01-17	3	1835484	1836098	615
928	5	Pseudomonas sp. B10	93127436	SEIT01_1120003	CDS	automatic/finished	trpF	N-(5'-phosphoribosyl)anthranilate isomerase	5.3.1.24	no						no		2022-01-17	1	6155293	6155868	576
928	5	Pseudomonas sp. SWI36 SWI36_1	77224029	SEIS01_300008	CDS	automatic/finished	trpF	N-(5'-phosphoribosyl)anthranilate isomerase	5.3.1.24	no						no		2020-07-15	-3	896273	896893	621
928	5	Pseudomonas sp. SWI36 SWI36_2	77218451	SEIQ01_310005	CDS	automatic/finished	trpF	N-(5'-phosphoribosyl)anthranilate isomerase	5.3.1.24	no						no		2020-07-15	1	954784	955404	621
959	5	Bacillus albus PFYN01	93130725	SEIR01_1680040	CDS	automatic/finished	ligA	DNA ligase (NAD-dependent)	6.5.1.2	no	e : enzyme			16.6 : Maintain ; 16.9 : Replicate ;	164915, 11095673, 12682299, 16267290	no	2a : Function from experimental evidences in other organisms	2022-01-17	-1	2843981	2845990	2010
959	5	Bacillus thuringiensis C15	93119880	SEIU01_850019	CDS	automatic/finished	ligA	DNA ligase (NAD-dependent)	6.5.1.2	no	e : enzyme			16.6 : Maintain ; 16.9 : Replicate ;	164915, 11095673, 12682299, 16267290	no	2a : Function from experimental evidences in other organisms	2022-01-17	2	3559829	3561838	2010
959	5	Pseudomonas sp. B10	93122885	SEIT01_280014	CDS	automatic/finished	ligA	DNA ligase	6.5.1.2	no						no		2022-01-17	2	1248965	1251322	2358
959	5	Pseudomonas sp. SWI36 SWI36_1	77227379	SEIS01_1700022	CDS	automatic/finished	ligA	DNA ligase	6.5.1.2, 6.5.1.6	no						no		2020-07-15	-3	4403720	4406050	2331
959	5	Pseudomonas sp. SWI36 SWI36_2	77221878	SEIQ01_1670022	CDS	automatic/finished	ligA	DNA ligase	6.5.1.2, 6.5.1.6	no						no		2020-07-15	-2	4532898	4535228	2331
960	5	Bacillus albus PFYN01	93130726	SEIR01_1680041	CDS	automatic/finished	pcrA	ATP-dependent DNA helicase	3.6.4.12	no	e : enzyme			16.6 : Maintain ; 16.8 : Protect ;	12073041, 12682299, 14594837, 16267290, 26070154, 32793628, 33920686	no	2a : Function from experimental evidences in other organisms	2022-01-17	-1	2846006	2848267	2262
960	5	Bacillus thuringiensis C15	93119879	SEIU01_850018	CDS	automatic/finished	pcrA	ATP-dependent DNA helicase	3.6.4.12	no	e : enzyme			16.6 : Maintain ; 16.8 : Protect ;	12073041, 12682299, 14594837, 16267290, 26070154, 32793628, 33920686	no	2a : Function from experimental evidences in other organisms	2022-01-17	3	3557553	3559814	2262
960	5	Pseudomonas sp. B10	93122695	SEIT01_260093	CDS	automatic/finished	rep	ATP-dependent DNA helicase Rep		no						no		2022-01-17	3	1055574	1057583	2010
960	5	Pseudomonas sp. B10	93125198	SEIT01_540076	CDS	automatic/finished	uvrD	DNA helicase II		no						no		2022-01-17	2	3753761	3755944	2184
960	5	Pseudomonas sp. SWI36 SWI36_1	77225841	SEIS01_1380042	CDS	automatic/finished	rep	ATP-dependent DNA helicase Rep	5.6.2.-	no						no		2020-07-15	-2	2755143	2757152	2010
960	5	Pseudomonas sp. SWI36 SWI36_1	77228077	SEIS01_1910011	CDS	automatic/finished	uvrD	ssDNA translocase and dsDNA helicase - DNA helicase II		no						no		2020-07-15	-2	5166096	5168282	2187
960	5	Pseudomonas sp. SWI36 SWI36_2	77220936	SEIQ01_1450041	CDS	automatic/finished	rep	ATP-dependent DNA helicase Rep	5.6.2.-	no						no		2020-07-15	-1	3546376	3548385	2010
960	5	Pseudomonas sp. SWI36 SWI36_2	77222432	SEIQ01_1850011	CDS	automatic/finished	uvrD	ssDNA translocase and dsDNA helicase - DNA helicase II		no						no		2020-07-15	-3	5131367	5133553	2187
965	5	Bacillus albus PFYN01	93134028	SEIR01_4530016	CDS	automatic/finished	uvrC	excinuclease ABC (subunit C)	4.1.99.3	no	e : enzyme			16.6 : Maintain ; 16.9 : Replicate ;	8655545, 16267290, 16426634, 25713353	no	2a : Function from experimental evidences in other organisms	2022-01-17	-3	5882097	5883881	1785
965	5	Bacillus thuringiensis C15	93120774	SEIU01_1070036	CDS	automatic/finished	uvrC	excinuclease ABC (subunit C)	4.1.99.3	no	e : enzyme			16.6 : Maintain ; 16.9 : Replicate ;	8655545, 16267290, 16426634, 25713353	no	2a : Function from experimental evidences in other organisms	2022-01-17	-1	4418872	4420656	1785
965	5	Pseudomonas sp. B10	93123510	SEIT01_330043	CDS	automatic/finished	uvrC	excision nuclease subunit C		no						no		2022-01-17	-2	1970204	1972027	1824
965	5	Pseudomonas sp. SWI36 SWI36_1	77223848	SEIS01_220014	CDS	automatic/finished	uvrC	excision nuclease subunit C	3.1.25.-	no						no		2020-07-15	-2	717897	719720	1824
965	5	Pseudomonas sp. SWI36 SWI36_2	77222987	SEIQ01_2030006	CDS	automatic/finished	uvrC	excision nuclease subunit C	3.1.25.-	no						no		2020-07-15	2	5682401	5684224	1824
966	5	Bacillus albus PFYN01	93129712	SEIR01_1010035	CDS	automatic/finished	moaD	molybdopterin synthase (small subunit)		no	e : enzyme			16.2 : Construct biomass (Anabolism) ;	11135669, 17223713, 19946146	no	2b : Function from indirect experimental evidences (e.g. phenotypes)	2022-01-17	-2	1917685	1917921	237
966	5	Bacillus albus PFYN01	93133597	SEIR01_4390023	CDS	automatic/finished	moaD	molybdopterin synthase (small subunit)		no	e : enzyme			16.2 : Construct biomass (Anabolism) ;	11135669, 17223713, 19946146	no	2b : Function from indirect experimental evidences (e.g. phenotypes)	2022-01-17	-2	5479045	5479278	234
966	5	Bacillus albus PFYN01	93133615	SEIR01_4400011	CDS	automatic/finished	moaD	molybdopterin synthase (small subunit)		no	e : enzyme			16.2 : Construct biomass (Anabolism) ;	11135669, 17223713, 19946146	no	2b : Function from indirect experimental evidences (e.g. phenotypes)	2022-01-17	1	5497666	5497899	234
966	5	Bacillus thuringiensis C15	93118403	SEIU01_590014	CDS	automatic/finished	moaD	molybdopterin synthase (small subunit)		no	e : enzyme			16.2 : Construct biomass (Anabolism) ;	11135669, 17223713, 19946146	no	2b : Function from indirect experimental evidences (e.g. phenotypes)	2022-01-17	1	2121223	2121459	237
966	5	Bacillus thuringiensis C15	93119269	SEIU01_720031	CDS	automatic/finished	moaD	molybdopterin synthase (small subunit)		no	e : enzyme			16.2 : Construct biomass (Anabolism) ;	11135669, 17223713, 19946146	no	2b : Function from indirect experimental evidences (e.g. phenotypes)	2022-01-17	-2	2953764	2953997	234
966	5	Bacillus thuringiensis C15	93119663	SEIU01_770028	CDS	automatic/finished	moaD	molybdopterin synthase (small subunit)		no	e : enzyme			16.2 : Construct biomass (Anabolism) ;	11135669, 17223713, 19946146	no	2b : Function from indirect experimental evidences (e.g. phenotypes)	2022-01-17	-2	3322506	3322739	234
966	5	Pseudomonas sp. B10	93122565	SEIT01_250086	CDS	automatic/finished	moaD	molybdopterin synthase sulfur carrier subunit	2.8.1.12	no						no		2022-01-17	3	926571	926813	243
966	5	Pseudomonas sp. B10	93125539	SEIT01_600018	CDS	automatic/finished	moaD	Molybdopterin synthase sulfur carrier subunit		no						no		2022-01-17	1	4148032	4148283	252
966	5	Pseudomonas sp. SWI36 SWI36_1	77225995	SEIS01_1400008	CDS	automatic/finished	moaD	molybdopterin synthase sulfur carrier subunit	2.8.1.12	no						no		2020-07-15	-2	2920710	2920955	246
966	5	Pseudomonas sp. SWI36 SWI36_2	77220355	SEIQ01_1350008	CDS	automatic/finished	moaD	molybdopterin synthase sulfur carrier subunit	2.8.1.12	no						no		2020-07-15	-1	2952307	2952552	246
984	5	Bacillus albus PFYN01	93130742	SEIR01_1680057	CDS	automatic/finished	purK	N5-carboxyaminoimidazole ribonucleotide synthase	6.3.4.18	no	e : enzyme			16.2 : Construct biomass (Anabolism) ;	8998996, 9683488, 21931218, 25372694	no	2a : Function from experimental evidences in other organisms	2022-01-17	-1	2862266	2863417	1152
984	5	Bacillus thuringiensis C15	93119864	SEIU01_850003	CDS	automatic/finished	purK	N5-carboxyaminoimidazole ribonucleotide synthase	6.3.4.18	no	e : enzyme			16.2 : Construct biomass (Anabolism) ;	8998996, 9683488, 21931218, 25372694	no	2a : Function from experimental evidences in other organisms	2022-01-17	3	3542247	3543398	1152
984	5	Pseudomonas sp. B10	93125172	SEIT01_540050	CDS	automatic/finished	purK	N5-carboxyaminoimidazole ribonucleotide synthase	6.3.4.18	no						no		2022-01-17	-2	3719660	3720742	1083
[truncated: 23,135 more rows]
